# Supplementary material
Source: publisher figshare collection journal article supplement (https://gsajournals.figshare.com/articles/dataset/_/5977459)
Supplement: Supplementary file 1 [file 2]

## Sheet: GO enrichment
	module	Term	Ontology	set.mean	set.size	z.score	genes	in.set	in.genes
GO:0050321	black	tau-protein kinase activity	MF	0.454545	11	8.10974	Mark2;Csnk1d;Mark4;Brsk1;Gsk3a;Cdk5;Phkg1;Gsk3b;Brsk2;Prkaa1;Mark1	5	Mark2;Csnk1d;Mark4;Brsk1;Gsk3a
GO:0003682	black	chromatin binding	MF	0.0859729	442	6.76017	Adnp;Cenpb;Arid3a;Kat2a;Maz;Mbd3;Nkx2-2;Nkx6-1;Notch1;Pold1;Rara;Ncor2;Srebf1;Tcf3;Thra;Wbp2;Creb3l1;Sirt6;Brd4;Med12;Pygo2;Cic;Lrwd1;Wdr13;Pelp1;Cdk9;Ehmt2;Mbd6;Mta1;Camta2;Safb;Ncoa5;Zmynd8;Tnrc18;Bahcc1;Phf21b;Auts2;Pkn1;Actb;Parp1;Apbb1;Apex1;Ar;Arx;Atf2;Neurog3;Hnrnpd;Barx2;Bcl6;Bmi1;Brca1;Ctnnb1;Runx2;Cbfa2t3;Cbx2;Cbx4;Cbx5;Ccnt1;Cdk1;Cdc45;Cebpb;Cited1;Clock;Coq7;Cys1;Creb3;Crebbp;Csnk2b;S…	38	Adnp;Cenpb;Arid3a;Kat2a;Maz;Mbd3;Nkx2-2;Nkx6-1;Notch1;Pold1;Rara;Ncor2;Srebf1;Tcf3;Thra;Wbp2;Creb3l1;Sirt6;Brd4;Med12;Pygo2;Cic;Lrwd1;Wdr13;Pelp1;Cdk9;Ehmt2;Mbd6;Mta1;Camta2;Safb;Ncoa5;Zmynd8;Tnrc18;Bahcc1;Phf21b;Auts2;Pkn1
GO:0031056	black	regulation of histone modification	BP	0.129032	124	6.32406	Ctbp1;Kat2a;Srebf1;Wbp2;Mapk3;Paxip1;Rps6ka4;Pygo2;Tada3;Prkd2;Cdk9;Ehmt2;Kdm4b;Rnf40;Auts2;Zfp335;Atg5;Atm;Bcl6;Brca1;Ctnnb1;Chek1;Ctcf;Daxx;Dnmt1;Dnmt3b;Eed;Lpin1;Gata2;Gata3;Gcg;Gfi1;Trip12;Isl1;Jarid2;Lif;Smad4;Mecp2;Men1;Mtf2;Mthfr;Myb;Nap1l2;Nos1;Nsd1;Kat2b;Prkd1;Pml;Ruvbl2;Ncor1;Foxp3;Spi1;Sin3a;Snai2;Smarcb1;Snca;Slk;Supt6;Tcf21;Phf1;Tert;Tgfb1;Trp53;Ctr9;Twist1;Ube2b;Vegfa;Xbp1;Taf7;Nelf…	16	Ctbp1;Kat2a;Srebf1;Wbp2;Mapk3;Paxip1;Rps6ka4;Pygo2;Tada3;Prkd2;Cdk9;Ehmt2;Kdm4b;Rnf40;Auts2;Zfp335
GO:0018393	black	internal peptidyl-lysine acetylation	BP	0.120567	141	6.16455	Ctbp1;Kat2a;Mbd3;Hnf1a;Tcf3;Wbp2;Med24;Mapk3;Paxip1;Rps6ka4;Brd4;Atat1;Tada3;Brd1;Bag6;Brpf3;Auts2;Apbb1;Atg5;Atf2;Bmi1;Brca1;Brca2;Chek1;Clock;Crebbp;Ctcf;Dr1;Epc1;Gata2;Gata3;Hcfc1;Irf4;Isl1;Ldb1;Lef1;Lif;Smad4;Mecp2;Msl3;Nap1l2;Ncoa1;Ncoa3;Nos1;Kat2b;Per1;Por;Ruvbl2;Foxp3;Spi1;Sin3a;Snai2;Smarca4;Smarcb1;Snca;Morf4l1;Tgfb1;Twist1;Pcgf2;Taf7;Taf10;Brd7;Tada1;Ing4;Mcrs1;Kat6b;Morf4l2;Actl6a;Ruvb…	17	Ctbp1;Kat2a;Mbd3;Hnf1a;Tcf3;Wbp2;Med24;Mapk3;Paxip1;Rps6ka4;Brd4;Atat1;Tada3;Brd1;Bag6;Brpf3;Auts2
GO:0006475	black	internal protein amino acid acetylation	BP	0.116438	146	5.98466	Ctbp1;Kat2a;Mbd3;Hnf1a;Tcf3;Wbp2;Med24;Mapk3;Paxip1;Rps6ka4;Brd4;Atat1;Tada3;Brd1;Bag6;Brpf3;Auts2;Apbb1;Atg5;Atf2;Bmi1;Brca1;Brca2;Chek1;Clock;Crebbp;Ctcf;Dr1;Epc1;Gata2;Gata3;Hcfc1;Irf4;Isl1;Ldb1;Lef1;Lif;Smad4;Mecp2;Mdh2;Msl3;Nap1l2;Ncoa1;Ncoa3;Nos1;Kat2b;Pck1;Per1;Por;Ruvbl2;Foxp3;Spi1;Sin3a;Snai2;Smarca4;Smarcb1;Snca;Morf4l1;Tgfb1;Twist1;Pcgf2;Taf7;Taf10;Brd7;Tada1;Ing4;Mcrs1;Kat6b;Naa10;Mor…	17	Ctbp1;Kat2a;Mbd3;Hnf1a;Tcf3;Wbp2;Med24;Mapk3;Paxip1;Rps6ka4;Brd4;Atat1;Tada3;Brd1;Bag6;Brpf3;Auts2
GO:0018394	black	peptidyl-lysine acetylation	BP	0.114865	148	5.91492	Ctbp1;Kat2a;Mbd3;Hnf1a;Tcf3;Wbp2;Med24;Mapk3;Paxip1;Rps6ka4;Brd4;Atat1;Tada3;Brd1;Bag6;Brpf3;Auts2;Apbb1;Atg5;Atf2;Bmi1;Brca1;Brca2;Chek1;Clock;Crebbp;Ctcf;Dr1;Epc1;Gata2;Gata3;Bloc1s1;Hcfc1;Hdac2;Irf4;Isl1;Ldb1;Lef1;Lif;Smad4;Mecp2;Msl3;Nap1l2;Ncoa1;Ncoa3;Nfe2;Nos1;Kat2b;Per1;Por;Ruvbl2;Foxp3;Spi1;Sin3a;Snai2;Smarca4;Smarcb1;Snca;Sox4;Morf4l1;Tgfb1;Twist1;Pcgf2;Taf7;Taf10;Brd7;Tada1;Ing4;Mcrs1;K…	17	Ctbp1;Kat2a;Mbd3;Hnf1a;Tcf3;Wbp2;Med24;Mapk3;Paxip1;Rps6ka4;Brd4;Atat1;Tada3;Brd1;Bag6;Brpf3;Auts2
GO:1903308	black	regulation of chromatin modification	BP	0.117647	136	5.85604	Ctbp1;Kat2a;Srebf1;Wbp2;Mapk3;Paxip1;Rps6ka4;Pygo2;Tada3;Prkd2;Cdk9;Ehmt2;Kdm4b;Rnf40;Auts2;Zfp335;Aicda;Atg5;Apobec1;Atm;Bcl6;Brca1;Ctnnb1;Cdc45;Chek1;Ctcf;Daxx;Dnmt1;Dnmt3b;Eed;Lpin1;Gata2;Gata3;Gcg;Gfi1;Trip12;Isl1;Jarid2;Lif;Smad4;Mecp2;Men1;Mtf2;Mthfr;Myb;Nap1l2;Nos1;Uhrf1;Nsd1;Kat2b;Phf2;Prkd1;Pml;Ruvbl2;Ncor1;Foxp3;Spi1;Sin3a;Snai2;Smarcb1;Snca;Slk;Supt6;Tcf21;Phf1;Tert;Tgfb1;Trp53;Ctr9;Tw…	16	Ctbp1;Kat2a;Srebf1;Wbp2;Mapk3;Paxip1;Rps6ka4;Pygo2;Tada3;Prkd2;Cdk9;Ehmt2;Kdm4b;Rnf40;Auts2;Zfp335
GO:0031058	black	positive regulation of histone modification	BP	0.144737	76	5.73585	Ctbp1;Kat2a;Srebf1;Wbp2;Mapk3;Paxip1;Rps6ka4;Prkd2;Cdk9;Rnf40;Auts2;Atm;Bcl6;Brca1;Daxx;Dnmt1;Dnmt3b;Eed;Lpin1;Gata3;Gcg;Isl1;Jarid2;Lif;Smad4;Men1;Mtf2;Myb;Nap1l2;Nos1;Kat2b;Prkd1;Pml;Ruvbl2;Ncor1;Foxp3;Snai2;Smarcb1;Slk;Phf1;Tgfb1;Trp53;Ctr9;Vegfa;Xbp1;Nelfa;Brd7;Tet1;Sart3;Paf1;Piwil2;Wdr61;Snw1;Paxbp1;Pih1d1;Pink1;Nipbl;Rps6ka5;Phf19;Asxl2;Rtf1;BC004004;Jdp2;Sirt1;Ube2n;Kdm1a;Ogt;Rnf20;Arrb1;…	11	Ctbp1;Kat2a;Srebf1;Wbp2;Mapk3;Paxip1;Rps6ka4;Prkd2;Cdk9;Rnf40;Auts2
GO:1902275	black	regulation of chromatin organization	BP	0.111888	143	5.60699	Ctbp1;Kat2a;Srebf1;Wbp2;Mapk3;Paxip1;Rps6ka4;Pygo2;Tada3;Prkd2;Cdk9;Ehmt2;Kdm4b;Rnf40;Auts2;Zfp335;Aicda;Atg5;Apobec1;Atm;Bcl6;Brca1;Ctnnb1;Cdc45;Chek1;Ctcf;Daxx;Dnmt1;Dnmt3b;Eed;Lpin1;Gata2;Gata3;Gcg;Gfi1;Trip12;Isl1;Jarid2;Lif;Smad4;Mecp2;Men1;Mtf2;Mthfr;Myb;Nap1l2;Nos1;Uhrf1;Nsd1;Kat2b;Padi2;Phf2;Prkd1;Pml;Ruvbl2;Ncor1;Foxp3;Spi1;Sin3a;Snai2;Smarcb1;Snca;Slk;Supt6;Tal1;Tcf21;Phf1;Tert;Tgfb1;Tr…	16	Ctbp1;Kat2a;Srebf1;Wbp2;Mapk3;Paxip1;Rps6ka4;Pygo2;Tada3;Prkd2;Cdk9;Ehmt2;Kdm4b;Rnf40;Auts2;Zfp335
GO:0035066	black	positive regulation of histone acetylation	BP	0.214286	28	5.6022	Kat2a;Wbp2;Mapk3;Paxip1;Rps6ka4;Auts2;Brca1;Gata3;Isl1;Lif;Smad4;Nap1l2;Nos1;Kat2b;Ruvbl2;Foxp3;Snai2;Smarcb1;Tgfb1;Brd7;Piwil2;Pih1d1;Rps6ka5;Arrb1;Arid5a;Tada2a;Tada2b;Ep300	6	Kat2a;Wbp2;Mapk3;Paxip1;Rps6ka4;Auts2
GO:1903310	black	positive regulation of chromatin modification	BP	0.1375	80	5.51113	Ctbp1;Kat2a;Srebf1;Wbp2;Mapk3;Paxip1;Rps6ka4;Prkd2;Cdk9;Rnf40;Auts2;Atm;Bcl6;Brca1;Ctnnb1;Daxx;Dnmt1;Dnmt3b;Eed;Lpin1;Gata3;Gcg;Isl1;Jarid2;Lif;Smad4;Men1;Mtf2;Myb;Nap1l2;Nos1;Kat2b;Prkd1;Pml;Ruvbl2;Ncor1;Foxp3;Sin3a;Snai2;Smarcb1;Slk;Phf1;Tgfb1;Trp53;Ctr9;Vegfa;Xbp1;Nelfa;Brd7;Tet1;Sart3;Paf1;Piwil2;Wdr61;Snw1;Paxbp1;Pih1d1;Pink1;Mier1;Nipbl;Rps6ka5;Phf19;Asxl2;Rtf1;BC004004;Jdp2;Sirt1;Ube2n;Kdm…	11	Ctbp1;Kat2a;Srebf1;Wbp2;Mapk3;Paxip1;Rps6ka4;Prkd2;Cdk9;Rnf40;Auts2
GO:0016573	black	histone acetylation	BP	0.110294	136	5.35919	Ctbp1;Kat2a;Mbd3;Hnf1a;Tcf3;Wbp2;Med24;Mapk3;Paxip1;Rps6ka4;Brd4;Tada3;Brd1;Brpf3;Auts2;Apbb1;Atg5;Atf2;Bmi1;Brca1;Brca2;Chek1;Clock;Crebbp;Ctcf;Dr1;Epc1;Gata2;Gata3;Hcfc1;Irf4;Isl1;Ldb1;Lef1;Lif;Smad4;Mecp2;Msl3;Nap1l2;Ncoa1;Ncoa3;Nos1;Kat2b;Per1;Ruvbl2;Foxp3;Spi1;Sin3a;Snai2;Smarca4;Smarcb1;Snca;Morf4l1;Tgfb1;Twist1;Pcgf2;Taf7;Taf10;Brd7;Tada1;Ing4;Mcrs1;Kat6b;Morf4l2;Actl6a;Ruvbl1;Noc2l;Piwil2…	15	Ctbp1;Kat2a;Mbd3;Hnf1a;Tcf3;Wbp2;Med24;Mapk3;Paxip1;Rps6ka4;Brd4;Tada3;Brd1;Brpf3;Auts2
GO:2000758	black	positive regulation of peptidyl-lysine acetylation	BP	0.2	30	5.34721	Kat2a;Wbp2;Mapk3;Paxip1;Rps6ka4;Auts2;Brca1;Gata3;Isl1;Lif;Smad4;Nap1l2;Nfe2;Nos1;Kat2b;Ruvbl2;Foxp3;Snai2;Smarcb1;Sox4;Tgfb1;Brd7;Piwil2;Pih1d1;Rps6ka5;Arrb1;Arid5a;Tada2a;Tada2b;Ep300	6	Kat2a;Wbp2;Mapk3;Paxip1;Rps6ka4;Auts2
GO:0043543	black	protein acylation	BP	0.0945274	201	5.23008	Ctbp1;Kat2a;Mbd3;Hnf1a;Tcf3;Wbp2;Med24;Mapk3;Paxip1;Rps6ka4;Brd4;Zdhhc1;Atat1;Tada3;Zdhhc9;Brd1;Bag6;Brpf3;Auts2;Aanat;Apbb1;Atg5;Atf2;Bmi1;Brca1;Brca2;Chek1;Clock;Crebbp;Ctcf;Dr1;Epc1;Gata2;Gata3;Bloc1s1;Hcfc1;Hdac2;Irf4;Isl1;Ldb1;Lef1;Lif;Smad4;Mecp2;Mdh2;Msl3;Nap1l2;Ncoa1;Ncoa3;Nfe2;Nmt1;Nmt2;Nos1;Kat2b;Pck1;Per1;Por;Ppm1a;Ppm1b;Ruvbl2;Foxp3;Spi1;Sin3a;Snai2;Smarca4;Smarcb1;Snca;Sox4;Morf4l1;T…	19	Ctbp1;Kat2a;Mbd3;Hnf1a;Tcf3;Wbp2;Med24;Mapk3;Paxip1;Rps6ka4;Brd4;Zdhhc1;Atat1;Tada3;Zdhhc9;Brd1;Bag6;Brpf3;Auts2
GO:0006473	black	protein acetylation	BP	0.1	170	5.21932	Ctbp1;Kat2a;Mbd3;Hnf1a;Tcf3;Wbp2;Med24;Mapk3;Paxip1;Rps6ka4;Brd4;Atat1;Tada3;Brd1;Bag6;Brpf3;Auts2;Aanat;Apbb1;Atg5;Atf2;Bmi1;Brca1;Brca2;Chek1;Clock;Crebbp;Ctcf;Dr1;Epc1;Gata2;Gata3;Bloc1s1;Hcfc1;Hdac2;Irf4;Isl1;Ldb1;Lef1;Lif;Smad4;Mecp2;Mdh2;Msl3;Nap1l2;Ncoa1;Ncoa3;Nfe2;Nos1;Kat2b;Pck1;Per1;Por;Ruvbl2;Foxp3;Spi1;Sin3a;Snai2;Smarca4;Smarcb1;Snca;Sox4;Morf4l1;Tgfb1;Twist1;Xbp1;Pcgf2;Taf7;Taf10;Br…	17	Ctbp1;Kat2a;Mbd3;Hnf1a;Tcf3;Wbp2;Med24;Mapk3;Paxip1;Rps6ka4;Brd4;Atat1;Tada3;Brd1;Bag6;Brpf3;Auts2
GO:0006367	black	transcription initiation from RNA polymerase II promoter	BP	0.148148	54	4.97667	Maz;Hnf1a;Thra;Med24;Paxip1;Med12;Med26;Med16;Ahr;Creb1;Ercc3;Hey2;Irf8;Med1;Psmc1;Psmc2;Psmc3;Psmc5;Srf;Taf6;Hnf1b;Tcf4;Wnt10b;Ikzf1;Psmc4;Taf7;Taf10;Med14;Atf7ip;Taf12;Ctnnbip1;Psmc6;Med4;Polr2g;Gtf2e2;Gtf2f2;Taf11;Polr2d;Med30;Med6;Polr2i;Cand1;Gtf2e1;Gtf2a1;Gtf2f1;Zfp451;Taf5;Taf4;Thrap3;Med17;Gtf2a2;Taf2;Med13;4933416C03Rik	8	Maz;Hnf1a;Thra;Med24;Paxip1;Med12;Med26;Med16
GO:0001843	black	neural tube closure	BP	0.11828	93	4.87172	Dvl2;Dvl3;Kat2a;Prkaca;Rara;Rarg;Tsc2;Med12;Fuz;Scrib;Plxnb2;Adm;Apaf1;Bcl10;Bmp4;Celsr1;Cobl;Dvl1;Enah;Folr1;Fzd1;Fzd3;Fzd6;Lmo4;Lrp6;Cited2;Pfn1;Prkacb;St14;Ptch1;Rab23;Rock2;Rps7;Sfrp2;Sema4c;Sfrp1;Stil;Ski;Spint1;Spint2;Sdc4;T;Tead2;Tgif1;Traf6;Tulp3;Twist1;Kdm6a;Vasp;Wnt5a;Sufu;Zeb2;Shroom3;Kdm2b;Dlc1;Nckap1;Deaf1;Sfrp5;Rala;Tmed2;Sall1;Tsc1;Ift172;Cthrc1;Ptk7;Ift57;Opa1;Cluap1;Lias;Ift122;A…	11	Dvl2;Dvl3;Kat2a;Prkaca;Rara;Rarg;Tsc2;Med12;Fuz;Scrib;Plxnb2
GO:0060606	black	tube closure	BP	0.11828	93	4.87172	Dvl2;Dvl3;Kat2a;Prkaca;Rara;Rarg;Tsc2;Med12;Fuz;Scrib;Plxnb2;Adm;Apaf1;Bcl10;Bmp4;Celsr1;Cobl;Dvl1;Enah;Folr1;Fzd1;Fzd3;Fzd6;Lmo4;Lrp6;Cited2;Pfn1;Prkacb;St14;Ptch1;Rab23;Rock2;Rps7;Sfrp2;Sema4c;Sfrp1;Stil;Ski;Spint1;Spint2;Sdc4;T;Tead2;Tgif1;Traf6;Tulp3;Twist1;Kdm6a;Vasp;Wnt5a;Sufu;Zeb2;Shroom3;Kdm2b;Dlc1;Nckap1;Deaf1;Sfrp5;Rala;Tmed2;Sall1;Tsc1;Ift172;Cthrc1;Ptk7;Ift57;Opa1;Cluap1;Lias;Ift122;A…	11	Dvl2;Dvl3;Kat2a;Prkaca;Rara;Rarg;Tsc2;Med12;Fuz;Scrib;Plxnb2
GO:0018205	black	peptidyl-lysine modification	BP	0.0798611	288	4.82803	Ctbp1;Kat2a;Mbd3;Hnf1a;Tcf3;Wbp2;Med24;Mapk3;Paxip1;Rps6ka4;Brd4;Pias4;Pygo2;Atat1;Tada3;Ehmt2;Kdm4b;Brd1;Bag6;Brpf3;Auts2;Zfp335;Kmt2d;Ahrr;Apbb1;Atg5;Arnt;Atf2;Atp7a;Bmi1;Brca1;Brca2;Capn3;Ctnnb1;Cbx4;Cdkn2a;Chek1;Clock;Crebbp;Ctcf;Dnmt1;Dnmt3b;Dr1;Eed;Egr1;Epc1;Bcl11a;Eya1;Ezh1;Ezh2;Gata2;Gata3;Gcg;Bloc1s1;Gfi1;Hist1h1d;Hcfc1;Hdac2;Hdac6;Hmg20b;Irf4;Isl1;Jarid2;Ldb1;Lef1;Lif;Smad4;Mdm2;Mecp2;M…	23	Ctbp1;Kat2a;Mbd3;Hnf1a;Tcf3;Wbp2;Med24;Mapk3;Paxip1;Rps6ka4;Brd4;Pias4;Pygo2;Atat1;Tada3;Ehmt2;Kdm4b;Brd1;Bag6;Brpf3;Auts2;Zfp335;Kmt2d
GO:1901985	black	positive regulation of protein acetylation	BP	0.171429	35	4.80002	Kat2a;Wbp2;Mapk3;Paxip1;Rps6ka4;Auts2;Brca1;Gata3;Isl1;Lif;Smad4;Nap1l2;Nfe2;Nos1;Kat2b;Ruvbl2;Foxp3;Snai2;Smarcb1;Sox4;Tgfb1;Xbp1;Brd7;Camk1;Terf2ip;Piwil2;Pih1d1;Rps6ka5;Kat5;Arrb1;Arid5a;Tada2a;Rapgef3;Tada2b;Ep300	6	Kat2a;Wbp2;Mapk3;Paxip1;Rps6ka4;Auts2
GO:0035148	black	tube formation	BP	0.100719	139	4.76433	Dvl2;Dvl3;Kat2a;Notch1;Prkaca;Rara;Rarg;Tsc2;Shank3;Med12;Fuz;Scrib;Plxnb2;Tctn1;Adm;Apaf1;Bcl10;Bcl2l11;Bmp4;Casp8;Ctnnb1;Cdh1;Celsr1;Cfl1;Cobl;Coq7;Dvl1;Eda;Edar;Enah;Folr1;Fzd1;Fzd3;Fzd6;Gata3;Gdnf;Hif1a;Hoxa1;Itgb1bp1;Lmo4;Lrp6;Cited2;Nfib;Nup50;Pax8;Pfn1;Prkacb;St14;Ptch1;Rab23;Ret;Rock2;Rps7;Sfrp2;Sema4c;Sfrp1;Shh;Stil;Six4;Ski;Sox11;Sox4;Sox8;Sox9;Spint1;Spint2;Sdc4;T;Hnf1b;Tead2;Tgif1;Tgm…	14	Dvl2;Dvl3;Kat2a;Notch1;Prkaca;Rara;Rarg;Tsc2;Shank3;Med12;Fuz;Scrib;Plxnb2;Tctn1
GO:0003712	black	transcription cofactor activity	MF	0.0733696	368	4.74408	Ctbp1;Atn1;Kat2a;Nkx2-2;Rara;Ncor2;Tcf3;Tle2;Wbp2;Zfpm1;Med24;Sirt6;Zmiz2;Pex14;Gps2;Pias4;Med12;Med26;Tada3;Mta1;Med16;Mkl1;Zmynd8;Phf21b;Zfp865;Pkn1;Maml3;Actn2;Aebp1;Aebp2;Aip;Apex1;Birc2;Arnt;Neurog3;Bcl10;Smyd1;C1qbp;Ctnnb1;Runx1t1;Cbfa2t2;Cbfa2t3;Cbfb;Ccnd1;Cdx2;Cdyl;Cebpa;Cited1;Cops2;Crebbp;Crym;Ctbp2;Daxx;Dcc;Pcbd1;Ddit3;Ddx5;Dnmt3b;Dyrk1b;Elf3;Elk3;Erf;Bcl11a;Foxh1;Fgf2;Lpin1;Gata3;Gata…	27	Ctbp1;Atn1;Kat2a;Nkx2-2;Rara;Ncor2;Tcf3;Tle2;Wbp2;Zfpm1;Med24;Sirt6;Zmiz2;Pex14;Gps2;Pias4;Med12;Med26;Tada3;Mta1;Med16;Mkl1;Zmynd8;Phf21b;Zfp865;Pkn1;Maml3
GO:0001841	black	neural tube formation	BP	0.109091	110	4.743	Dvl2;Dvl3;Kat2a;Prkaca;Rara;Rarg;Tsc2;Med12;Fuz;Scrib;Plxnb2;Tctn1;Adm;Apaf1;Bcl10;Bmp4;Casp8;Celsr1;Cfl1;Cobl;Coq7;Dvl1;Enah;Folr1;Fzd1;Fzd3;Fzd6;Hif1a;Lmo4;Lrp6;Cited2;Nup50;Pfn1;Prkacb;St14;Ptch1;Rab23;Rock2;Rps7;Sfrp2;Sema4c;Sfrp1;Shh;Stil;Ski;Sox11;Sox4;Spint1;Spint2;Sdc4;T;Tead2;Tgif1;Traf6;Tulp3;Twist1;Kdm6a;Vasp;Wnt5a;Sufu;Zeb2;Map3k7;Shroom3;Kdm2b;Dlc1;Nckap1;Deaf1;Sfrp5;Rala;Stk3;Tmed2;…	12	Dvl2;Dvl3;Kat2a;Prkaca;Rara;Rarg;Tsc2;Med12;Fuz;Scrib;Plxnb2;Tctn1
GO:0001838	black	embryonic epithelial tube formation	BP	0.104	125	4.72861	Dvl2;Dvl3;Kat2a;Prkaca;Rara;Rarg;Tsc2;Shank3;Med12;Fuz;Scrib;Plxnb2;Tctn1;Adm;Apaf1;Bcl10;Bmp4;Casp8;Ctnnb1;Celsr1;Cfl1;Cobl;Coq7;Dvl1;Enah;Folr1;Fzd1;Fzd3;Fzd6;Gata3;Gdnf;Hif1a;Lmo4;Lrp6;Cited2;Nup50;Pax8;Pfn1;Prkacb;St14;Ptch1;Rab23;Ret;Rock2;Rps7;Sfrp2;Sema4c;Sfrp1;Shh;Stil;Six4;Ski;Sox11;Sox4;Sox8;Sox9;Spint1;Spint2;Sdc4;T;Hnf1b;Tead2;Tgif1;Traf6;Tulp3;Twist1;Kdm6a;Vasp;Wnt9b;Wnt4;Wnt5a;Wnt6;…	13	Dvl2;Dvl3;Kat2a;Prkaca;Rara;Rarg;Tsc2;Shank3;Med12;Fuz;Scrib;Plxnb2;Tctn1
GO:0072175	black	epithelial tube formation	BP	0.104	125	4.72861	Dvl2;Dvl3;Kat2a;Prkaca;Rara;Rarg;Tsc2;Shank3;Med12;Fuz;Scrib;Plxnb2;Tctn1;Adm;Apaf1;Bcl10;Bmp4;Casp8;Ctnnb1;Celsr1;Cfl1;Cobl;Coq7;Dvl1;Enah;Folr1;Fzd1;Fzd3;Fzd6;Gata3;Gdnf;Hif1a;Lmo4;Lrp6;Cited2;Nup50;Pax8;Pfn1;Prkacb;St14;Ptch1;Rab23;Ret;Rock2;Rps7;Sfrp2;Sema4c;Sfrp1;Shh;Stil;Six4;Ski;Sox11;Sox4;Sox8;Sox9;Spint1;Spint2;Sdc4;T;Hnf1b;Tead2;Tgif1;Traf6;Tulp3;Twist1;Kdm6a;Vasp;Wnt9b;Wnt4;Wnt5a;Wnt6;…	13	Dvl2;Dvl3;Kat2a;Prkaca;Rara;Rarg;Tsc2;Shank3;Med12;Fuz;Scrib;Plxnb2;Tctn1
GO:0016570	black	histone modification	BP	0.0731707	369	4.72838	Ctbp1;Kat2a;Mbd3;Srebf1;Hnf1a;Tcf3;Wbp2;Med24;Hsf4;Mapk3;Sirt6;Paxip1;Rps6ka4;Brd4;Pygo2;Tada3;Prkd2;Cdk9;Ehmt2;Kdm4b;Brd1;Rnf40;Brpf3;Auts2;Pkn1;Zfp335;Kmt2d;Apbb1;Atg5;Atf2;Atm;Bcl6;Bmi1;Brca1;Brca2;Ctnnb1;Cdk2;Chek1;Clock;Crebbp;Ctcf;Daxx;Ddb1;Dnmt1;Dnmt3b;Dr1;Phc1;Eed;Elk4;Epc1;Smarcad1;Eya1;Eya2;Eya3;Ezh1;Ezh2;Fbl;Lpin1;Gata2;Gata3;Usp15;Gcg;Gfi1;Gsg2;Trip12;Hist1h1d;Hcfc1;Hdac2;Hdac3;Hdac5;…	27	Ctbp1;Kat2a;Mbd3;Srebf1;Hnf1a;Tcf3;Wbp2;Med24;Hsf4;Mapk3;Sirt6;Paxip1;Rps6ka4;Brd4;Pygo2;Tada3;Prkd2;Cdk9;Ehmt2;Kdm4b;Brd1;Rnf40;Brpf3;Auts2;Pkn1;Zfp335;Kmt2d
GO:0014020	black	primary neural tube formation	BP	0.113402	97	4.69795	Dvl2;Dvl3;Kat2a;Prkaca;Rara;Rarg;Tsc2;Med12;Fuz;Scrib;Plxnb2;Adm;Apaf1;Bcl10;Bmp4;Celsr1;Cfl1;Cobl;Dvl1;Enah;Folr1;Fzd1;Fzd3;Fzd6;Hif1a;Lmo4;Lrp6;Cited2;Pfn1;Prkacb;St14;Ptch1;Rab23;Rock2;Rps7;Sfrp2;Sema4c;Sfrp1;Stil;Ski;Spint1;Spint2;Sdc4;T;Tead2;Tgif1;Traf6;Tulp3;Twist1;Kdm6a;Vasp;Wnt5a;Sufu;Zeb2;Shroom3;Kdm2b;Dlc1;Nckap1;Deaf1;Sfrp5;Rala;Tmed2;Sall1;Tsc1;Ift172;Cthrc1;Ptk7;Ift57;Opa1;Cluap1;Li…	11	Dvl2;Dvl3;Kat2a;Prkaca;Rara;Rarg;Tsc2;Med12;Fuz;Scrib;Plxnb2
GO:0050772	black	positive regulation of axonogenesis	BP	0.126761	71	4.66718	Adnp;Limk1;Stk11;Map2k2;Anapc2;Golga2;Plxnb2;Plxnb1;Megf8;Ache;Apoe;Rnd2;Bdnf;Bmpr2;Cdh4;Crabp2;Dscam;Efna5;Bcl11a;Fn1;Fxn;Ilk;L1cam;Map1b;Mapt;Nefl;Ngf;Nin;Nrp1;Ntn1;Ntrk2;Ntrk3;Pafah1b1;Robo1;Cxcl12;Sema4d;Sema5a;Sema7a;Shox2;Skil;Srf;Tiam1;Trpc5;Vegfa;Trpv2;Wnt3;Twf2;Zeb2;Map2k1;Tnfrsf12a;Rufy3;Rab11a;Golga4;Dbn1;Gsk3b;Stk25;Lpar3;Metrn;Shtn1;Ist1;Ndel1;Braf;Plxnb3;Nrg1;Amigo1;Disc1;Robo2;Islr…	9	Adnp;Limk1;Stk11;Map2k2;Anapc2;Golga2;Plxnb2;Plxnb1;Megf8
GO:0051569	black	regulation of histone H3-K4 methylation	BP	0.185185	27	4.62776	Paxip1;Pygo2;Ehmt2;Auts2;Zfp335;Brca1;Ctnnb1;Dnmt1;Dnmt3b;Gata3;Gcg;Gfi1;Smad4;Myb;Ctr9;Nelfa;H2afy;Wdr61;Snw1;Pih1d1;Bcor;Kmt2b;Rtf1;Kdm1a;Ogt;Kmt2a;Ctcfl	5	Paxip1;Pygo2;Ehmt2;Auts2;Zfp335
GO:0016569	black	covalent chromatin modification	BP	0.0718085	376	4.61987	Ctbp1;Kat2a;Mbd3;Srebf1;Hnf1a;Tcf3;Wbp2;Med24;Hsf4;Mapk3;Sirt6;Paxip1;Rps6ka4;Brd4;Pygo2;Tada3;Prkd2;Cdk9;Ehmt2;Kdm4b;Brd1;Rnf40;Brpf3;Auts2;Pkn1;Zfp335;Kmt2d;Aicda;Apbb1;Atg5;Apobec1;Atf2;Atm;Bcl6;Bmi1;Brca1;Brca2;Ctnnb1;Cdk2;Chek1;Clock;Crebbp;Ctcf;Daxx;Ddb1;Dnmt1;Dnmt3a;Dnmt3b;Dr1;Phc1;Eed;Elk4;Epc1;Smarcad1;Eya1;Eya2;Eya3;Ezh1;Ezh2;Fbl;Lpin1;Gata2;Gata3;Usp15;Gcg;Gfi1;Gsg2;Trip12;Hist1h1d;Hcf…	27	Ctbp1;Kat2a;Mbd3;Srebf1;Hnf1a;Tcf3;Wbp2;Med24;Hsf4;Mapk3;Sirt6;Paxip1;Rps6ka4;Brd4;Pygo2;Tada3;Prkd2;Cdk9;Ehmt2;Kdm4b;Brd1;Rnf40;Brpf3;Auts2;Pkn1;Zfp335;Kmt2d
GO:0035065	black	regulation of histone acetylation	BP	0.145833	48	4.59854	Ctbp1;Kat2a;Wbp2;Mapk3;Paxip1;Rps6ka4;Auts2;Atg5;Brca1;Chek1;Ctcf;Gata2;Gata3;Isl1;Lif;Smad4;Mecp2;Nap1l2;Nos1;Kat2b;Ruvbl2;Foxp3;Spi1;Sin3a;Snai2;Smarcb1;Snca;Tgfb1;Twist1;Taf7;Brd7;Noc2l;Piwil2;Eid1;Pih1d1;Rps6ka5;Iws1;Atg7;Sirt1;Zfp451;Arrb1;Kmt2a;Myocd;Arid5a;Flcn;Tada2a;Tada2b;Ep300	7	Ctbp1;Kat2a;Wbp2;Mapk3;Paxip1;Rps6ka4;Auts2
GO:0016331	black	morphogenesis of embryonic epithelium	BP	0.0939597	149	4.45592	Dvl2;Dvl3;Kat2a;Prkaca;Rara;Rarg;Tsc2;Shank3;Med12;Fuz;Scrib;Plxnb2;Llgl2;Tctn1;Adm;Aldh1a1;Apaf1;Ar;Bcl10;Bmp4;Bmp7;Casp8;Ctnnb1;Celsr1;Cfl1;Cobl;Coq7;Dvl1;Enah;Fgfr2;Folr1;Fzd1;Fzd3;Fzd6;Gata3;Gdnf;Gli2;Htt;Hhex;Hif1a;Jag2;Lama5;Lmo4;Lrp6;Cited2;Nup50;Pax8;Pcdh8;Pdx1;Pfn1;Prkacb;St14;Ptch1;Rab23;Aldh1a2;Ret;Rock2;Rps7;Sfrp2;Sema4c;Sfrp1;Shh;Stil;Six4;Ski;Sox11;Sox4;Sox8;Sox9;Spint1;Spint2;Sdc4;…	14	Dvl2;Dvl3;Kat2a;Prkaca;Rara;Rarg;Tsc2;Shank3;Med12;Fuz;Scrib;Plxnb2;Llgl2;Tctn1
GO:0051020	black	GTPase binding	MF	0.0774908	271	4.45399	Dvl2;Dvl3;Gnb2;Prkaca;Tsc2;Fmnl3;Inf2;Pak4;Rgl3;Ipo4;Rusc2;Exoc8;Sgsm3;Rap1gap;Mfn2;Git1;Llgl2;Cdc42bpb;Ipo13;Gga3;Pkn1;Abca1;Adcyap1r1;Ankfy1;Ap1g1;Birc5;Bicd1;Bnip3;Anxa2;Cav1;Chm;Chml;Cit;Dapk3;Diaph1;Dvl1;Ect2;Ehd1;Aimp1;Eno1;Eps8;Evi5;Fer;Fgd1;Srgap2;Gdi1;Gdi2;Gnb1;Gnb3;Hdac3;Hsp90aa1;Slc6a4;Kpnb1;Kif16b;Kif3b;Arhgef2;Llgl1;Mllt4;Myo1c;Myo5a;Myo5b;Ncf2;Ndrg1;Ngfr;Nsf;Odf2;Pak1;Pak3;Pde6d;Pfn…	21	Dvl2;Dvl3;Gnb2;Prkaca;Tsc2;Fmnl3;Inf2;Pak4;Rgl3;Ipo4;Rusc2;Exoc8;Sgsm3;Rap1gap;Mfn2;Git1;Llgl2;Cdc42bpb;Ipo13;Gga3;Pkn1
GO:0000989	black	transcription factor activity, transcription factor binding	MF	0.0684597	409	4.42749	Ctbp1;Atn1;Kat2a;Nkx2-2;Notch1;Rara;Ncor2;Tcf3;Tle2;Wbp2;Zfpm1;Med24;Sirt6;Zmiz2;Pex14;Gps2;Pias4;Med12;Med26;Tada3;Mta1;Med16;Mkl1;Zmynd8;Phf21b;Zfp865;Pkn1;Maml3;Actn2;Aebp1;Aebp2;Ahrr;Aip;Apex1;Birc2;Arnt;Arntl;Neurog3;Bcl10;Smyd1;C1qbp;Ctnnb1;Runx1t1;Cbfa2t2;Cbfa2t3;Cbfb;Ccnd1;Cdx2;Cdyl;Cebpa;Cited1;Clock;Cops2;Cys1;Creb1;Crebbp;Cry1;Cry2;Crym;Ctbp2;Daxx;Dcc;Pcbd1;Ddit3;Ddx5;Dnmt3b;Dyrk1b;Elf…	28	Ctbp1;Atn1;Kat2a;Nkx2-2;Notch1;Rara;Ncor2;Tcf3;Tle2;Wbp2;Zfpm1;Med24;Sirt6;Zmiz2;Pex14;Gps2;Pias4;Med12;Med26;Tada3;Mta1;Med16;Mkl1;Zmynd8;Phf21b;Zfp865;Pkn1;Maml3
GO:0000988	black	transcription factor activity, protein binding	MF	0.0677966	413	4.3709	Ctbp1;Atn1;Kat2a;Nkx2-2;Notch1;Rara;Ncor2;Tcf3;Tle2;Wbp2;Zfpm1;Med24;Sirt6;Zmiz2;Pex14;Gps2;Pias4;Med12;Med26;Tada3;Mta1;Med16;Mkl1;Zmynd8;Phf21b;Zfp865;Pkn1;Maml3;Actn2;Aebp1;Aebp2;Ahrr;Aip;Apex1;Birc2;Arnt;Arntl;Neurog3;Bcl10;Smyd1;C1qbp;Ctnnb1;Runx1t1;Cbfa2t2;Cbfa2t3;Cbfb;Ccnd1;Cdx2;Cdyl;Cebpa;Cited1;Clock;Cops2;Cys1;Creb1;Crebbp;Cry1;Cry2;Crym;Ctbp2;Daxx;Dcc;Pcbd1;Ddit3;Ddx5;Dnmt3b;Dyrk1b;Elf…	28	Ctbp1;Atn1;Kat2a;Nkx2-2;Notch1;Rara;Ncor2;Tcf3;Tle2;Wbp2;Zfpm1;Med24;Sirt6;Zmiz2;Pex14;Gps2;Pias4;Med12;Med26;Tada3;Mta1;Med16;Mkl1;Zmynd8;Phf21b;Zfp865;Pkn1;Maml3
GO:1903312	black	negative regulation of mRNA metabolic process	BP	0.15	40	4.34914	Hnrnpl;Srsf4;Dhx34;Cdk9;Srsf9;Rnf40;C1qbp;Ccnt1;Dyrk1a;Srsf10;Hnrnpc;Hnrnpk;Npm1;Pabpc1;Ptbp1;Rbmxl1;Rnps1;Sap18;Tra2b;Supt5;Tob1;Ctr9;U2af2;Nelfe;Hnrnpa2b1;Acin1;Pcbp4;Bag4;Srsf6;Rbm42;Nbas;Secisbp2;Zc3h14;Celf4;Rnf20;Tmbim6;Srsf7;Ptbp3;Sfswap;Rbm10	6	Hnrnpl;Srsf4;Dhx34;Cdk9;Srsf9;Rnf40
GO:0021915	black	neural tube development	BP	0.0909091	154	4.31126	Dvl2;Dvl3;Kat2a;Notch1;Prkaca;Psen2;Rara;Rarg;Tsc2;Med12;Fuz;Scrib;Plxnb2;Tctn1;Adm;Apaf1;Bcl10;Bmi1;Bmp4;Zfp36l1;Casp8;Celsr1;Cfl1;Cobl;Coq7;Dvl1;Enah;Epha2;Fkbp8;Folr1;Fzd1;Fzd3;Fzd6;Gas1;Gli2;Gli3;Hes1;Hif1a;Mnx1;Foxa1;Foxa2;Kif3a;Lmo4;Lrp6;Cited2;Nf1;Nup50;Pax6;Pfn1;Prkacb;St14;Psen1;Ptch1;Rab23;Aldh1a2;Rock2;Rps7;Sfrp2;Sema4c;Sfrp1;Shh;Stil;Ski;Sox11;Sox17;Sox4;Spint1;Spint2;Sdc4;T;Tcf7;Tcf7…	14	Dvl2;Dvl3;Kat2a;Notch1;Prkaca;Psen2;Rara;Rarg;Tsc2;Med12;Fuz;Scrib;Plxnb2;Tctn1
GO:2001252	black	positive regulation of chromosome organization	BP	0.0935252	139	4.27283	Ctbp1;Kat2a;Srebf1;Wbp2;Mapk3;Paxip1;Rps6ka4;Pnkp;Prkd2;Cdk9;Rnf40;Auts2;Acd;Atm;Bcl6;Brca1;Ctnnb1;Cct2;Cct3;Cct4;Cct5;Cct6a;Cct7;Cct8;Daxx;Dnmt1;Dnmt3b;Eed;Ercc1;Lpin1;Gata3;Gcg;Isl1;Jarid2;Lif;Smad4;Mapkapk5;Men1;Mre11a;Mtf2;Myb;Nap1l2;Nek2;Nos1;Kat2b;Prkd1;Prkcq;Pkib;Plk1;Pml;Pten;Rad50;Rb1;Ruvbl2;Ncor1;Foxp3;Sin3a;Snai2;Smarcb1;Slk;Aurkb;Tal1;Tcp1;Phf1;Terf2;Tgfb1;Tnks;Trp53;Ctr9;Vegfa;Xbp1;A…	13	Ctbp1;Kat2a;Srebf1;Wbp2;Mapk3;Paxip1;Rps6ka4;Pnkp;Prkd2;Cdk9;Rnf40;Auts2;Acd
GO:0031267	black	small GTPase binding	MF	0.077551	245	4.23715	Dvl2;Dvl3;Prkaca;Tsc2;Fmnl3;Inf2;Pak4;Rgl3;Ipo4;Rusc2;Exoc8;Sgsm3;Rap1gap;Git1;Llgl2;Cdc42bpb;Ipo13;Gga3;Pkn1;Abca1;Adcyap1r1;Ankfy1;Ap1g1;Birc5;Bicd1;Anxa2;Cav1;Chm;Chml;Cit;Dapk3;Diaph1;Dvl1;Ect2;Ehd1;Eps8;Evi5;Fer;Fgd1;Srgap2;Gdi1;Gdi2;Slc6a4;Kpnb1;Kif16b;Kif3b;Arhgef2;Llgl1;Mllt4;Myo1c;Myo5a;Myo5b;Ncf2;Ndrg1;Ngfr;Nsf;Odf2;Pak1;Pak3;Pde6d;Pfn1;Prkch;Pex5;Dennd5a;Rab7;Rabggtb;Rac1;Rab34;Rangap1…	19	Dvl2;Dvl3;Prkaca;Tsc2;Fmnl3;Inf2;Pak4;Rgl3;Ipo4;Rusc2;Exoc8;Sgsm3;Rap1gap;Git1;Llgl2;Cdc42bpb;Ipo13;Gga3;Pkn1
GO:0007268	black	synaptic transmission	BP	0.064877	447	4.19092	Adnp;Cacna1c;Cacnb1;Cacnb3;Cux2;Eif4ebp2;Gnai2;Grik5;Grin2d;Hap1;Prkaca;Psen2;Rara;Mink1;Gabbr1;Slc12a5;Jph3;Shank3;Mapk8ip2;Clstn1;Ppfia3;Anapc2;Hrh3;Scrib;Slc8a2;Kiss1r;Zmynd8;Brsk1;Crtc1;Asic1;Chrna1;Chrna4;Chrna7;Chrnb1;Chrnb2;Adcyap1;Adora1;Adora2a;Adra1a;Adrb1;Adrb2;Agrn;Agt;Apba2;Arf1;Atp2a2;Atp2b2;Bche;Bdnf;Tspo;Cacna1a;Cacna1b;Cacna1g;Cacnb2;Cacnb4;Calb1;Camk2a;Camk2b;Camk4;Car2;Car7;Ctn…	29	Adnp;Cacna1c;Cacnb1;Cacnb3;Cux2;Eif4ebp2;Gnai2;Grik5;Grin2d;Hap1;Prkaca;Psen2;Rara;Mink1;Gabbr1;Slc12a5;Jph3;Shank3;Mapk8ip2;Clstn1;Ppfia3;Anapc2;Hrh3;Scrib;Slc8a2;Kiss1r;Zmynd8;Brsk1;Crtc1
GO:0099536	black	synaptic signaling	BP	0.064877	447	4.19092	Adnp;Cacna1c;Cacnb1;Cacnb3;Cux2;Eif4ebp2;Gnai2;Grik5;Grin2d;Hap1;Prkaca;Psen2;Rara;Mink1;Gabbr1;Slc12a5;Jph3;Shank3;Mapk8ip2;Clstn1;Ppfia3;Anapc2;Hrh3;Scrib;Slc8a2;Kiss1r;Zmynd8;Brsk1;Crtc1;Asic1;Chrna1;Chrna4;Chrna7;Chrnb1;Chrnb2;Adcyap1;Adora1;Adora2a;Adra1a;Adrb1;Adrb2;Agrn;Agt;Apba2;Arf1;Atp2a2;Atp2b2;Bche;Bdnf;Tspo;Cacna1a;Cacna1b;Cacna1g;Cacnb2;Cacnb4;Calb1;Camk2a;Camk2b;Camk4;Car2;Car7;Ctn…	29	Adnp;Cacna1c;Cacnb1;Cacnb3;Cux2;Eif4ebp2;Gnai2;Grik5;Grin2d;Hap1;Prkaca;Psen2;Rara;Mink1;Gabbr1;Slc12a5;Jph3;Shank3;Mapk8ip2;Clstn1;Ppfia3;Anapc2;Hrh3;Scrib;Slc8a2;Kiss1r;Zmynd8;Brsk1;Crtc1
GO:0099537	black	trans-synaptic signaling	BP	0.064877	447	4.19092	Adnp;Cacna1c;Cacnb1;Cacnb3;Cux2;Eif4ebp2;Gnai2;Grik5;Grin2d;Hap1;Prkaca;Psen2;Rara;Mink1;Gabbr1;Slc12a5;Jph3;Shank3;Mapk8ip2;Clstn1;Ppfia3;Anapc2;Hrh3;Scrib;Slc8a2;Kiss1r;Zmynd8;Brsk1;Crtc1;Asic1;Chrna1;Chrna4;Chrna7;Chrnb1;Chrnb2;Adcyap1;Adora1;Adora2a;Adra1a;Adrb1;Adrb2;Agrn;Agt;Apba2;Arf1;Atp2a2;Atp2b2;Bche;Bdnf;Tspo;Cacna1a;Cacna1b;Cacna1g;Cacnb2;Cacnb4;Calb1;Camk2a;Camk2b;Camk4;Car2;Car7;Ctn…	29	Adnp;Cacna1c;Cacnb1;Cacnb3;Cux2;Eif4ebp2;Gnai2;Grik5;Grin2d;Hap1;Prkaca;Psen2;Rara;Mink1;Gabbr1;Slc12a5;Jph3;Shank3;Mapk8ip2;Clstn1;Ppfia3;Anapc2;Hrh3;Scrib;Slc8a2;Kiss1r;Zmynd8;Brsk1;Crtc1
GO:0006506	black	GPI anchor biosynthetic process	BP	0.16129	31	4.19082	Pigq;Pigo;Pigt;Pigs;Pgap3;Dpm1;Dpm2;Gpaa1;Piga;Pigf;Pign;Pigb;Pigp;Alg5;Pigyl;Pyurf;Pigc;Pigm;Dpm3;Pigw;Pigx;Pigh;Mppe1;Pigu;Pigv;Pgap2;Pigz;Pgap1;Pigl;Pigk;Pigg	5	Pigq;Pigo;Pigt;Pigs;Pgap3
GO:0009247	black	glycolipid biosynthetic process	BP	0.12963	54	4.19009	Pigq;St3gal3;Pigo;Pigt;Pigs;Pgap3;Gal3st3;Dpm1;Dpm2;B4galnt1;Gpaa1;Piga;Pigf;St3gal1;St3gal4;St3gal2;St6galnac2;St6galnac3;St6galnac4;St8sia2;St8sia3;St8sia4;St3gal5;Ugcg;Ugt8a;St6galnac5;Pign;St6galnac6;Gal3st1;St3gal6;Pigb;Pigp;Alg5;Pigyl;Pyurf;Pigc;Pigm;Dpm3;Pigw;Pigx;Pigh;A3galt2;Mppe1;Pigu;Pigv;Pgap2;A4galt;Pigz;Pgap1;St8sia6;6430550D23Rik;Pigl;Pigk;Pigg	7	Pigq;St3gal3;Pigo;Pigt;Pigs;Pgap3;Gal3st3
GO:2000756	black	regulation of peptidyl-lysine acetylation	BP	0.12963	54	4.19009	Ctbp1;Kat2a;Wbp2;Mapk3;Paxip1;Rps6ka4;Auts2;Atg5;Brca1;Chek1;Ctcf;Gata2;Gata3;Hdac2;Isl1;Lif;Smad4;Mecp2;Nap1l2;Nfe2;Nos1;Kat2b;Ruvbl2;Foxp3;Spi1;Sin3a;Snai2;Smarcb1;Snca;Sox4;Tgfb1;Twist1;Taf7;Brd7;Noc2l;Piwil2;Eid1;Sirt3;Klf15;Pih1d1;Rps6ka5;Iws1;Atg7;Sirt1;Zfp451;Arrb1;Kmt2a;Myocd;Arid5a;Flcn;Tada2a;Tada2b;Ep300;Hdac1	7	Ctbp1;Kat2a;Wbp2;Mapk3;Paxip1;Rps6ka4;Auts2
GO:0060322	black	head development	BP	0.0628803	493	4.14776	Cdk5r2;Kat2a;Adgrg1;Hap1;Hspg2;Notch1;Numbl;Pcnt;Psen2;Ptprs;Rara;Rarg;Ncor2;Cd27;Xrcc1;Map2k2;Mapk3;Mapk8ip3;Sphk2;Shank3;Pygo2;Atat1;Trappc9;Scrib;Plxnb2;Mkl1;Bag6;Szt2;Zfp335;Tctn1;Ccdc85c;Aatk;Abl1;Abl2;Chrnb2;Apaf1;Aplp1;Aplp2;Nr2f2;App;Rhoa;Phox2a;Arnt2;Arx;Atm;Neurog2;Atp2b2;Atp7a;Atrn;Axin1;Bax;Bcan;Bcl2;Fabp7;Bmi1;Bmp2;Bmp4;Bmpr1a;Brca2;Btg2;C5ar1;Cacna1a;Aspm;Ctnna2;Ctnnb1;Cbln1;Cbs;Cck…	31	Cdk5r2;Kat2a;Adgrg1;Hap1;Hspg2;Notch1;Numbl;Pcnt;Psen2;Ptprs;Rara;Rarg;Ncor2;Cd27;Xrcc1;Map2k2;Mapk3;Mapk8ip3;Sphk2;Shank3;Pygo2;Atat1;Trappc9;Scrib;Plxnb2;Mkl1;Bag6;Szt2;Zfp335;Tctn1;Ccdc85c
GO:0006505	black	GPI anchor metabolic process	BP	0.15625	32	4.09331	Pigq;Pigo;Pigt;Pigs;Pgap3;Dpm1;Dpm2;Gpaa1;Gpld1;Piga;Pigf;Pign;Pigb;Pigp;Alg5;Pigyl;Pyurf;Pigc;Pigm;Dpm3;Pigw;Pigx;Pigh;Mppe1;Pigu;Pigv;Pgap2;Pigz;Pgap1;Pigl;Pigk;Pigg	5	Pigq;Pigo;Pigt;Pigs;Pgap3
GO:0010770	black	positive regulation of cell morphogenesis involved in differentiation	BP	0.0864198	162	4.09154	Adnp;Cux2;Dnm2;Limk1;Notch1;Numbl;Stk11;Map2k2;Bcl9l;Anapc2;Golga2;Plxnb2;Plxnb1;Megf8;Ache;Ager;Apoa1;Apoe;Rnd2;Axin2;Bdnf;Bmp2;Bmpr2;C1qbp;Calr;Camk2b;Ctnnb1;Cdh4;Col1a1;Crabp2;Cux1;Dab2;Dscam;Eef2k;Efna5;Dmtn;Epha4;Bcl11a;Ezh2;Fn1;Fxn;Gcnt2;Gdnf;Has2;Hdac2;Ilk;Itgb3;L1cam;Lef1;Lif;Lrp8;Smad2;Smad3;Smad4;Met;Pias2;Map1b;Mapt;Myoc;Nefl;Ngf;Nin;Nrp1;Ntn1;Ntrk2;Ntrk3;Numb;Pafah1b1;Pak3;Pax8;Enpp2;…	14	Adnp;Cux2;Dnm2;Limk1;Notch1;Numbl;Stk11;Map2k2;Bcl9l;Anapc2;Golga2;Plxnb2;Plxnb1;Megf8
GO:0031346	black	positive regulation of cell projection organization	BP	0.0690691	333	4.05073	Adnp;Cux2;Dnm2;Mark2;Kat2a;Hap1;Limk1;Numbl;Stk11;Map2k2;Shank3;Fuz;Kctd17;Smurf1;Anapc2;Golga2;Plxnb2;Ppp2r5b;Zmynd8;Rltpr;Plxnb1;Megf8;Crtc1;Abl2;Ache;Adamts1;Adcyap1;Avil;Agrn;Apbb1;Apc;Apoe;Aqp1;Arf1;Rnd2;Arsb;Atf1;Bdnf;Bmp4;Bmp5;Bmp7;Bmpr2;Camk2b;Cbfa2t2;Cd24a;Cdh4;Ccr7;Cnr1;Cntf;Cntn1;Cobl;Cpeb1;Cpne6;Crabp2;Crp;Cux1;Dcc;Dmd;Dscam;Dvl1;Eef1a1;Eef2k;Efna5;Eif4g2;Enc1;Epha3;Epha4;Epor;Bcl11a;…	23	Adnp;Cux2;Dnm2;Mark2;Kat2a;Hap1;Limk1;Numbl;Stk11;Map2k2;Shank3;Fuz;Kctd17;Smurf1;Anapc2;Golga2;Plxnb2;Ppp2r5b;Zmynd8;Rltpr;Plxnb1;Megf8;Crtc1
GO:0001012	black	RNA polymerase II regulatory region DNA binding	MF	0.0625	480	4.04233	Cux2;Arid3a;Zbtb7a;Maz;Mbd3;Nfic;Nkx2-2;Nkx6-1;Pou2f2;Pou6f1;Rara;Rarg;Dpf2;Ncor2;Srebf1;Hnf1a;Tcf3;Wbp2;Zfpm1;Hsf4;Klf13;Med12;Cdk9;Ehmt2;Klf16;Cc2d1a;Zmynd8;Mypop;Phf21b;Zfp335;Actb;Aebp1;Aebp2;Alx4;Ar;Phox2a;Arnt2;Arx;Atf1;Atf2;Atf3;Atf4;Neurog3;Bach1;Bach2;Barx2;Bcl6b;Bcl6;Prdm1;Klf5;Nr1i3;Runx2;Runx1;Runx3;Cdx2;Cdx4;Cebpa;Cebpz;Cebpb;Cebpd;Cebpg;Clock;Cys1;Creb1;Creb3;Crebbp;Ctcf;Cux1;Dbp;Dd…	30	Cux2;Arid3a;Zbtb7a;Maz;Mbd3;Nfic;Nkx2-2;Nkx6-1;Pou2f2;Pou6f1;Rara;Rarg;Dpf2;Ncor2;Srebf1;Hnf1a;Tcf3;Wbp2;Zfpm1;Hsf4;Klf13;Med12;Cdk9;Ehmt2;Klf16;Cc2d1a;Zmynd8;Mypop;Phf21b;Zfp335
GO:0005905	black	coated pit	CC	0.122807	57	4.00753	Ap2a1;Dnm2;Epn1;Lrp1;Hip1r;Tnk2;Atat1;Ap1s1;Ap2a2;Ap2m1;Ap4s1;App;Clta;Ackr3;Cttn;Dab2;Eps15;Eps15l1;Fnbp1;Lrp2;Hspd1;Itsn1;Ldlr;Myo6;Reps1;Sele;Slc2a4;Snap91;Sort1;Trf;Tfrc;Vldlr;Cubn;Cltc;Necap1;Ap2b1;Epn3;Cdhr5;Tbc1d5;Sgip1;Dnm1l;Fcho1;Cltb;Rab35;Cemip;Sh3bp4;Ldlrap1;Ap4e1;Ap1s2;Arrb1;Arrb2;Fcho2;Ap2s1;Picalm;Lrp12;Ap1s3;Ocrl	7	Ap2a1;Dnm2;Epn1;Lrp1;Hip1r;Tnk2;Atat1
GO:0048667	black	cell morphogenesis involved in neuron differentiation	BP	0.0621118	483	4.00536	Adnp;Cux2;Dnm2;Mark2;Limk1;Nkx6-1;Notch1;Numbl;Stk11;Map2k2;Mapk8ip3;Mink1;Shank3;Pvrl1;Mapk8ip2;Sptbn4;Anapc2;Golga2;Scrib;Unc5b;Plxnb2;Ntng2;Unk;Szt2;Lingo1;Plxnb1;Sarm1;Megf8;Brsk1;Tctn1;Aatk;Abl1;Abl2;Ache;Chrnb2;Actb;Agrn;Alcam;Ank3;Apbb1;Apbb2;Apc;Apoe;App;Rnd2;Artn;Arx;Neurog2;Neurog3;Atp2b2;Atp7a;Pcdh15;Bcl2;Bdnf;Bmp7;Bmpr1b;Bmpr2;Cacna1a;Camk2b;Ctnna2;Runx3;Cck;Cckar;Cdh11;Cdh2;Cdh4;Cdk5…	30	Adnp;Cux2;Dnm2;Mark2;Limk1;Nkx6-1;Notch1;Numbl;Stk11;Map2k2;Mapk8ip3;Mink1;Shank3;Pvrl1;Mapk8ip2;Sptbn4;Anapc2;Golga2;Scrib;Unc5b;Plxnb2;Ntng2;Unk;Szt2;Lingo1;Plxnb1;Sarm1;Megf8;Brsk1;Tctn1
GO:0051646	black	mitochondrion localization	BP	0.151515	33	3.99977	Kat2a;Mfn2;Rhot2;Msto1;Brat1;Alb;Atp2a1;Hdac6;Hif1a;Atcay;Kif1b;Mef2a;Bhlha15;Map1b;Mapt;Mtm1;Nefl;Pvrl2;Synj2;Ubb;Uchl1;Synj2bp;Park2;Rhot1;Myo19;Lrrk2;Plin5;Mgarp;Mul1;Cluh;Ogt;Slc4a5;Fez1	5	Kat2a;Mfn2;Rhot2;Msto1;Brat1
GO:0050804	black	modulation of synaptic transmission	BP	0.0719424	278	3.97381	Adnp;Cux2;Eif4ebp2;Gnai2;Grik5;Hap1;Prkaca;Psen2;Rara;Gabbr1;Jph3;Shank3;Mapk8ip2;Clstn1;Ppfia3;Anapc2;Slc8a2;Kiss1r;Zmynd8;Crtc1;Asic1;Chrna4;Chrna7;Chrnb2;Adcyap1;Adora1;Adora2a;Adra1a;Adrb1;Agt;Arf1;Atp2a2;Atp2b2;Bche;Bdnf;Cacna1a;Cacna1b;Calb1;Camk2a;Camk2b;Car2;Car7;Cckbr;Cd38;Cdk5;Cel;Celsr1;Chat;Cnih2;Cnr1;Cnr2;Cpeb1;Cplx2;Creb1;Crhr1;Crhr2;Cx3cr1;Dbi;Dlg4;Dmpk;Dnm1;Drd1;Drd2;Dvl1;Edn1;Edn…	20	Adnp;Cux2;Eif4ebp2;Gnai2;Grik5;Hap1;Prkaca;Psen2;Rara;Gabbr1;Jph3;Shank3;Mapk8ip2;Clstn1;Ppfia3;Anapc2;Slc8a2;Kiss1r;Zmynd8;Crtc1
GO:0045666	black	positive regulation of neuron differentiation	BP	0.0680473	338	3.97214	Adnp;Cux2;Mark2;Hap1;Limk1;Nkx2-2;Nkx6-1;Numbl;Rara;Stk11;Tcf3;Map2k2;Mapk8ip3;Shank3;Smurf1;Anapc2;Golga2;Plxnb2;Ppp2r5b;Zmynd8;Plxnb1;Megf8;Crtc1;Abl2;Ache;Adamts1;Adcyap1;Avil;Apbb1;Apoe;Arf1;Rhoa;Rnd2;Arsb;Atf1;Neurog2;Neurog3;Bcl2;Bcl6;Bdnf;Bmp2;Bmp4;Bmp5;Bmp6;Bmp7;Bmpr2;Bnip2;Camk2b;Cbfa2t2;Cd24a;Cdh4;Ccr5;Cnr1;Cntf;Cntn1;Cobl;Cpeb1;Cpne6;Crabp2;Crp;Cux1;Dab1;Dcc;Dmd;Dnmt3b;Dscam;Dvl1;Ect2;…	23	Adnp;Cux2;Mark2;Hap1;Limk1;Nkx2-2;Nkx6-1;Numbl;Rara;Stk11;Tcf3;Map2k2;Mapk8ip3;Shank3;Smurf1;Anapc2;Golga2;Plxnb2;Ppp2r5b;Zmynd8;Plxnb1;Megf8;Crtc1
GO:0007613	black	memory	BP	0.0990099	101	3.95721	Adnp;Cux2;Eif4ebp2;Psen2;Jph3;Shank3;Hrh3;Ehmt2;Slc8a2;Crtc1;Asic1;Chrna7;Chrnb2;Adcy8;Adrb1;Calb1;Camk4;Casp1;Chat;Cnr1;Comt;Creb1;Crhr1;Cx3cr1;Cyp7b1;Drd1;Drd2;Egr1;Fen1;Fgf13;Glp1r;Grin1;Grin2a;Grin2b;Hrh1;Hrh2;Htr2a;Htr7;Slc6a4;Igf1;Igf2;Il1b;Il1rn;Itga3;Itga5;Itpr3;Mdk;Mecp2;Ngf;Ntan1;Ntrk2;Oxtr;Prkcz;Plcb1;Psen1;Pten;Ptgs1;Ptgs2;Reln;S100b;Serpinf1;Sgk1;Snap25;Plk2;Srf;Tac1;Tacr1;Th;Eif2ak4…	10	Adnp;Cux2;Eif4ebp2;Psen2;Jph3;Shank3;Hrh3;Ehmt2;Slc8a2;Crtc1
GO:0030900	black	forebrain development	BP	0.0711744	281	3.92063	Cdk5r2;Kat2a;Adgrg1;Hap1;Notch1;Numbl;Pcnt;Psen2;Ptprs;Ncor2;Xrcc1;Mapk8ip3;Shank3;Atat1;Trappc9;Mkl1;Szt2;Zfp335;Tctn1;Ccdc85c;Chrnb2;Apaf1;Aplp1;Aplp2;Nr2f2;App;Rhoa;Arx;Neurog2;Atp7a;Axin1;Bax;Bcan;Fabp7;Bmp2;Bmp4;Bmpr1a;Btg2;Aspm;Ctnnb1;Cckar;Cdh2;Cdk5;Cdk5r1;Chrd;Cxcr4;Col3a1;Creb1;Csf1r;Cx3cr1;Dab1;Dbi;Dclk1;Dct;Dcx;Dlx1;Drd1;Drd2;E2f1;Egfr;Epha5;Ephb2;Ephb3;Nr2f1;Erbb4;Mecom;Ext1;Fgf13;Fgf…	20	Cdk5r2;Kat2a;Adgrg1;Hap1;Notch1;Numbl;Pcnt;Psen2;Ptprs;Ncor2;Xrcc1;Mapk8ip3;Shank3;Atat1;Trappc9;Mkl1;Szt2;Zfp335;Tctn1;Ccdc85c
GO:0006352	black	DNA-templated transcription, initiation	BP	0.103448	87	3.91072	Maz;Hnf1a;Thra;Med24;Paxip1;Med12;Med26;Brf1;Med16;Ahr;Ctnnb1;Crcp;Creb1;Ercc3;Fosl1;Hey2;Tfb2m;Irf8;Jun;Lipe;Mitf;Myc;Med1;Psmc1;Psmc2;Psmc3;Psmc5;Ptrf;Srf;Taf1b;Taf6;Tbp;Hnf1b;Tcf4;Tfam;Ttf1;Twist1;Wnt10b;Ikzf1;Psmc4;Taf7;Taf10;Med14;Atf7ip;Polr1e;Taf12;Brf2;Ctnnbip1;Psmc6;Med4;Polr3g;Polr2g;Gtf2e2;Gtf2f2;Taf11;Polr2d;Med30;Med6;Polr3gl;Polr2i;Cand1;Taf4b;Bclaf1;Gtf2e1;Rtf1;Polr3h;Gtf2a1;Smarca…	9	Maz;Hnf1a;Thra;Med24;Paxip1;Med12;Med26;Brf1;Med16
GO:0050686	black	negative regulation of mRNA processing	BP	0.147059	34	3.90994	Hnrnpl;Srsf4;Cdk9;Srsf9;Rnf40;C1qbp;Ccnt1;Dyrk1a;Srsf10;Hnrnpk;Npm1;Ptbp1;Rbmxl1;Rnps1;Sap18;Tra2b;Supt5;Tob1;Ctr9;U2af2;Nelfe;Hnrnpa2b1;Acin1;Pcbp4;Srsf6;Rbm42;Zc3h14;Celf4;Rnf20;Tmbim6;Srsf7;Ptbp3;Sfswap;Rbm10	5	Hnrnpl;Srsf4;Cdk9;Srsf9;Rnf40
GO:0043966	black	histone H3 acetylation	BP	0.118644	59	3.89261	Kat2a;Tcf3;Wbp2;Brd4;Tada3;Brd1;Brpf3;Brca1;Brca2;Chek1;Dr1;Gata3;Irf4;Ldb1;Lef1;Lif;Smad4;Nap1l2;Kat2b;Per1;Spi1;Sin3a;Smarca4;Smarcb1;Taf10;Tada1;Ing4;Piwil2;Pole3;Ing5;Taf12;Pole4;Pih1d1;Meaf6;Supt7l;Elp3;Crtc2;Sgf29;Jade2;Elp4;Brpf1;Sirt1;Trim16;Zfp451;Taf5l;Taf9;Supt3;Wdr5;Yeats2;Kmt2a;Tada2a;Kat7;Mbip;Csrp2bp;Kat6a;Sap130;Jade1;Ep300;Jade3	7	Kat2a;Tcf3;Wbp2;Brd4;Tada3;Brd1;Brpf3
GO:0032870	black	cellular response to hormone stimulus	BP	0.0638821	407	3.87696	Csk;Eif4ebp2;Inppl1;Notch1;Pik3r2;Prkaca;Rara;Rarg;Shc1;Slc9a1;Srebf1;Thra;Tsc2;Wbp2;Med24;Adrm1;Med12;Pelp1;Med16;Safb;Ncoa5;Ipo13;Wdtc1;P2ry6;Kmt2d;Gsk3a;Adcy6;Parp1;Adra2a;Agrp;Agtr1a;Ahsg;Akt1;Akt2;Anxa5;Nr2f2;Aqp1;Ar;Rhoa;Arntl;Atp1a1;Avpr2;Phb2;Bdnf;Bmp4;Bmp7;Brca1;Calr;Nr1i3;Casp9;Ctnnb1;Cav1;Cav2;Cdk2;Cish;Socs3;Socs1;Clock;Cpeb1;Crhbp;Crhr1;Crhr2;Bcar1;Cry1;Cry2;Csnk2b;Cyp7b1;Dab2;Daxx;D…	26	Csk;Eif4ebp2;Inppl1;Notch1;Pik3r2;Prkaca;Rara;Rarg;Shc1;Slc9a1;Srebf1;Thra;Tsc2;Wbp2;Med24;Adrm1;Med12;Pelp1;Med16;Safb;Ncoa5;Ipo13;Wdtc1;P2ry6;Kmt2d;Gsk3a
GO:0033044	black	regulation of chromosome organization	BP	0.0716981	265	3.85515	Ctbp1;Kat2a;Srebf1;Wbp2;Mapk3;Paxip1;Rps6ka4;Pnkp;Pygo2;Xrcc3;Tada3;Prkd2;Cdk9;Ehmt2;Kdm4b;Rnf40;Auts2;Zfp335;Acd;Parp1;Aicda;Apc;Atg5;Apobec1;Atm;Axin2;Bcl6;Brca1;Bub1;Bub1b;Ctnnb1;Cct2;Cct3;Cct4;Cct5;Cct6a;Cct7;Cct8;Cdc45;Chek1;Cit;Csnk2a1;Csnk2a2;Ctcf;Daxx;Dnmt1;Dnmt3b;Eed;Ercc1;Lpin1;Gata2;Gata3;Gcg;Gfi1;Trip12;H3f3a;H3f3b;Hnrnpc;Isl1;Jarid2;Lif;Mad1l1;Smad4;Mapkapk5;Mecp2;Men1;Mre11a;Mtf2;Mt…	19	Ctbp1;Kat2a;Srebf1;Wbp2;Mapk3;Paxip1;Rps6ka4;Pnkp;Pygo2;Xrcc3;Tada3;Prkd2;Cdk9;Ehmt2;Kdm4b;Rnf40;Auts2;Zfp335;Acd
GO:0000977	black	RNA polymerase II regulatory region sequence-specific DNA binding	MF	0.0611814	474	3.84823	Cux2;Arid3a;Zbtb7a;Maz;Mbd3;Nfic;Nkx2-2;Nkx6-1;Pou2f2;Pou6f1;Rara;Rarg;Dpf2;Srebf1;Hnf1a;Tcf3;Wbp2;Zfpm1;Hsf4;Klf13;Med12;Cdk9;Ehmt2;Klf16;Cc2d1a;Zmynd8;Mypop;Phf21b;Zfp335;Actb;Aebp1;Aebp2;Alx4;Ar;Phox2a;Arnt2;Arx;Atf1;Atf2;Atf3;Atf4;Neurog3;Bach1;Bach2;Barx2;Bcl6b;Bcl6;Prdm1;Klf5;Nr1i3;Runx2;Runx1;Runx3;Cdx2;Cdx4;Cebpa;Cebpz;Cebpb;Cebpd;Cebpg;Clock;Cys1;Creb1;Creb3;Crebbp;Ctcf;Cux1;Dbp;Ddit3;Dd…	29	Cux2;Arid3a;Zbtb7a;Maz;Mbd3;Nfic;Nkx2-2;Nkx6-1;Pou2f2;Pou6f1;Rara;Rarg;Dpf2;Srebf1;Hnf1a;Tcf3;Wbp2;Zfpm1;Hsf4;Klf13;Med12;Cdk9;Ehmt2;Klf16;Cc2d1a;Zmynd8;Mypop;Phf21b;Zfp335
GO:1901983	black	regulation of protein acetylation	BP	0.116667	60	3.83703	Ctbp1;Kat2a;Wbp2;Mapk3;Paxip1;Rps6ka4;Auts2;Atg5;Brca1;Chek1;Ctcf;Gata2;Gata3;Hdac2;Isl1;Lif;Smad4;Mecp2;Nap1l2;Nfe2;Nos1;Kat2b;Ruvbl2;Foxp3;Spi1;Sin3a;Snai2;Smarcb1;Snca;Sox4;Tgfb1;Twist1;Xbp1;Taf7;Brd7;Camk1;Park7;Terf2ip;Noc2l;Piwil2;Eid1;Sirt3;Klf15;Pih1d1;Rps6ka5;Iws1;Atg7;Kat5;Sirt1;Zfp451;Arrb1;Kmt2a;Myocd;Arid5a;Flcn;Tada2a;Rapgef3;Tada2b;Ep300;Hdac1	7	Ctbp1;Kat2a;Wbp2;Mapk3;Paxip1;Rps6ka4;Auts2
GO:0035904	black	aorta development	BP	0.12766	47	3.83023	Dnm2;Lrp1;Nprl3;Notch1;Notch4;Fuz;Prdm1;Cxcr4;Col3a1;Efnb2;Ephb4;Eya1;Foxh1;Lrp2;Hes1;Hey1;Hey2;Ndst1;Jag1;Kif7;Lox;Smad6;Pdgfrb;Prox1;Rbpj;Smarca4;Sox4;Srf;Tbx1;Tbx2;Sufu;Cntrl;Dll4;Dctn5;Tab1;Plxnd1;Ap2b1;Myh10;Sec24b;Prickle1;Mylk;Adamts6;Hectd1;Pde2a;Kat6a;Snx17;Ltbp1	6	Dnm2;Lrp1;Nprl3;Notch1;Notch4;Fuz
GO:0051568	black	histone H3-K4 methylation	BP	0.12766	47	3.83023	Paxip1;Pygo2;Ehmt2;Auts2;Zfp335;Kmt2d;Brca1;Ctnnb1;Dnmt1;Dnmt3b;Gata3;Gcg;Gfi1;Hist1h1d;Smad4;Myb;Ctr9;Ash2l;Nelfa;H2afy;Hist1h1c;Hist1h1e;Ncoa6;Dpy30;Wdr61;Snw1;Pih1d1;Kmt2e;Bcor;Cxxc1;Kmt2b;Rtf1;Wdr82;Kdm1a;Ogt;Rlf;Wdr5;Ash1l;Tet3;Rbbp5;Tet2;Kmt2a;Kmt2c;Setd1a;Arid4a;Bend3;Ctcfl	6	Paxip1;Pygo2;Ehmt2;Auts2;Zfp335;Kmt2d
GO:0003713	black	transcription coactivator activity	MF	0.0761905	210	3.80427	Atn1;Kat2a;Nkx2-2;Rara;Tcf3;Wbp2;Med24;Zmiz2;Med12;Med26;Tada3;Mta1;Med16;Mkl1;Pkn1;Maml3;Actn2;Apex1;Birc2;Arnt;Neurog3;Bcl10;Ctnnb1;Cbfb;Cebpa;Cited1;Crebbp;Ctbp2;Daxx;Dcc;Pcbd1;Ddx5;Dyrk1b;Elf3;Fgf2;Lpin1;Gata3;Gata4;Nr3c1;Hand2;Hcfc1;Hipk2;Hmga1;Prmt2;Hyal2;Isl1;Jun;Junb;Jund;Jup;Mak;Mef2a;Cited2;Myt1l;Naca;Ncoa1;Ncoa2;Ncoa3;Neurod1;Npm1;Kat2b;Phf2;Pou1f1;Prkcb;Pml;Prrx1;Pou3f1;Med1;Ppard;Ppa…	16	Atn1;Kat2a;Nkx2-2;Rara;Tcf3;Wbp2;Med24;Zmiz2;Med12;Med26;Tada3;Mta1;Med16;Mkl1;Pkn1;Maml3
GO:0010498	black	proteasomal protein catabolic process	BP	0.0659026	349	3.80396	Gna12;Prkaca;Psen2;Rbck1;Sgta;Ubqln2;Fzr1;Ube4b;Rnf126;Osbpl7;Usp19;Kctd17;Syvn1;Xrcc3;Smurf1;Ubqln4;Csnk1d;Mta1;Agap3;Bag6;Rnf40;Fbxl19;Gsk3a;Akt1;Apc;Birc2;Araf;Arntl;Atm;Aup1;Axin1;Btrc;Bub1;Bub1b;Cbfa2t3;Ccnf;Cd2ap;Clock;Clu;Plk3;Csnk2a1;Csnk2a2;Dab2;Ddb1;Ddit3;Dvl1;Rhbdf1;Enc1;Fhit;Gba;Gclc;Rack1;Gpx1;Hfe;Mad1l1;Smad7;Mdm2;Psmd7;Mtm1;Commd1;Nfe2l2;Pcbp2;Prkcg;Pkd1;Plk1;Pml;Ppp2cb;Psen1;Psmb5…	23	Gna12;Prkaca;Psen2;Rbck1;Sgta;Ubqln2;Fzr1;Ube4b;Rnf126;Osbpl7;Usp19;Kctd17;Syvn1;Xrcc3;Smurf1;Ubqln4;Csnk1d;Mta1;Agap3;Bag6;Rnf40;Fbxl19;Gsk3a
GO:0090311	black	regulation of protein deacetylation	BP	0.138889	36	3.74033	Ctbp1;Ncor2;Srebf1;Tada3;Prkd2;Bcl6;Dyrk1a;Lpin1;Fnta;Hdac2;Prkd1;Pml;Ncor1;Foxp3;Tcf21;Tgfb1;Trp53;Vegfa;Nek3;Mapk8;Ripk3;Pink1;Znhit1;Nipbl;BC004004;Jdp2;Trps1;Sirt1;Brms1;Spred1;Spred2;Kdm5a;Tada2a;Ccar2;Fry;Ep300	5	Ctbp1;Ncor2;Srebf1;Tada3;Prkd2
GO:0019894	black	kinesin binding	MF	0.135135	37	3.66013	Mapk8ip1;Mapk8ip3;Mapk8ip2;Clstn1;Crocc;Actb;Ap1g1;Daxx;Kpnb1;Atcay;Kcnc1;Kifap3;Klc2;Ktn1;Lrp8;Nup62;Snca;Ift88;Mapk8;Stau2;Tor1a;Nek6;Plekhm2;Kif18b;Spag9;Shtn1;Fam83d;Kif1bp;Jakmip1;Ap1ar;Klc3;Prc1;Arhgef10;Disc1;Sybu;Sptbn5;Pifo	5	Mapk8ip1;Mapk8ip3;Mapk8ip2;Clstn1;Crocc
GO:0048736	black	appendage development	BP	0.0833333	144	3.64084	Gna12;Lrp5;Notch1;Pcnt;Psen2;Rara;Rarg;Hnf1a;Fuz;Slc39a3;Megf8;Acd;Alx4;Nr2f2;Atp7a;Bak1;Bax;Bcl2l11;Bmp4;Bmp7;Bmpr1a;Bmpr1b;Bmpr2;Ctnnb1;Runx2;Col2a1;Comp;Crabp2;Dlx6;Mecom;Fbn2;Fgf9;Fgfr1;Fgfr2;Fmn1;Fzd6;Gas1;Gdf5;Gja1;Gja5;Gli2;Gli3;Gnaq;Gnas;Gpc3;Hand2;Hdac2;Foxn1;Idua;Ihh;Itga6;Aff3;Lef1;Lmx1b;Lrp6;Smad4;Meox2;Msx1;Mycn;Notch2;Pbx1;Pbx2;Pcsk5;Prrx1;Med1;Psen1;Ptch1;Rab23;Aldh1a2;Prrx2;Scx;Sf…	12	Gna12;Lrp5;Notch1;Pcnt;Psen2;Rara;Rarg;Hnf1a;Fuz;Slc39a3;Megf8;Acd
GO:0060173	black	limb development	BP	0.0833333	144	3.64084	Gna12;Lrp5;Notch1;Pcnt;Psen2;Rara;Rarg;Hnf1a;Fuz;Slc39a3;Megf8;Acd;Alx4;Nr2f2;Atp7a;Bak1;Bax;Bcl2l11;Bmp4;Bmp7;Bmpr1a;Bmpr1b;Bmpr2;Ctnnb1;Runx2;Col2a1;Comp;Crabp2;Dlx6;Mecom;Fbn2;Fgf9;Fgfr1;Fgfr2;Fmn1;Fzd6;Gas1;Gdf5;Gja1;Gja5;Gli2;Gli3;Gnaq;Gnas;Gpc3;Hand2;Hdac2;Foxn1;Idua;Ihh;Itga6;Aff3;Lef1;Lmx1b;Lrp6;Smad4;Meox2;Msx1;Mycn;Notch2;Pbx1;Pbx2;Pcsk5;Prrx1;Med1;Psen1;Ptch1;Rab23;Aldh1a2;Prrx2;Scx;Sf…	12	Gna12;Lrp5;Notch1;Pcnt;Psen2;Rara;Rarg;Hnf1a;Fuz;Slc39a3;Megf8;Acd
GO:0046467	black	membrane lipid biosynthetic process	BP	0.0957447	94	3.63362	Pigq;St3gal3;Sphk2;Pigo;Fam57b;Pigt;Pigs;Pgap3;Gal3st3;Alox12b;Degs1;Dpm1;Dpm2;B4galnt1;Gba;Gpaa1;Cyr61;P2rx1;P2rx7;Piga;Pigf;Prkcd;St3gal1;St3gal4;St3gal2;St6galnac2;St6galnac3;St6galnac4;St8sia2;St8sia3;St8sia4;St3gal5;Smpd1;Smpd2;Sphk1;Sptlc2;Ugcg;Ugt8a;Aloxe3;St6galnac5;Pign;Hacd1;St6galnac6;Pla2g6;Gal3st1;Elovl1;St3gal6;Pigb;Pigp;B4galt6;Smpd3;Acer3;Alg5;Pigyl;Pyurf;Ormdl2;Cers4;Pigc;Pigm;Sa…	9	Pigq;St3gal3;Sphk2;Pigo;Fam57b;Pigt;Pigs;Pgap3;Gal3st3
GO:0021537	black	telencephalon development	BP	0.0769231	182	3.59598	Cdk5r2;Kat2a;Adgrg1;Numbl;Pcnt;Ptprs;Ncor2;Xrcc1;Shank3;Atat1;Trappc9;Szt2;Tctn1;Ccdc85c;Rhoa;Arx;Bax;Bcan;Bmp2;Bmp4;Btg2;Aspm;Ctnnb1;Cdh2;Cdk5;Cdk5r1;Cxcr4;Col3a1;Csf1r;Cx3cr1;Dab1;Dbi;Dcx;Dlx1;Drd1;Drd2;Egfr;Epha5;Ephb2;Ephb3;Nr2f1;Erbb4;Ext1;Fgf13;Fgfr1;Srgap2;Gli3;Grin1;Hdac2;Htt;Hes1;Foxg1;Hif1a;Hnrnpk;Hprt;Id2;Id4;Inhba;Kcna1;Kif3a;Lamb1;Lef1;Lhx6;Lrp6;Lrp8;Ascl1;Mdk;Mllt4;Neurod1;Nf1;Nf2;N…	14	Cdk5r2;Kat2a;Adgrg1;Numbl;Pcnt;Ptprs;Ncor2;Xrcc1;Shank3;Atat1;Trappc9;Szt2;Tctn1;Ccdc85c
GO:0000139	black	Golgi membrane	CC	0.0742574	202	3.57072	Dnm2;Ext2;Furin;St3gal3;Scamp2;Cabp1;Mapk8ip3;Sppl2b;Scyl1;Golga2;Man2a2;Zdhhc9;Hid1;Scap;Myo18a;Ap1s1;Arf1;Atp7b;Bet1;Cav1;Cdc42;Cln3;Clta;Copa;Creb3;Cux1;Cyp2e1;Rhbdf1;Lgr5;B4galnt1;Gnas;Hyal2;Ica1;Itm2b;Kif13a;Lfng;Llgl1;Man1a;Man1a2;Man2a1;Mfng;Mmp24;Myo1b;Nucb1;Pcsk7;Abcb1b;Abcb4;Prkce;Prkci;Srgn;Rab1a;Rac1;Rfng;Sec22b;Sec23a;Glg1;St6gal1;St3gal1;St3gal4;St3gal2;St6galnac2;St8sia1;St8sia2;St…	15	Dnm2;Ext2;Furin;St3gal3;Scamp2;Cabp1;Mapk8ip3;Sppl2b;Scyl1;Golga2;Man2a2;Zdhhc9;Hid1;Scap;Myo18a
GO:0007420	black	brain development	BP	0.0594714	454	3.55076	Cdk5r2;Kat2a;Adgrg1;Hap1;Hspg2;Notch1;Numbl;Pcnt;Psen2;Ptprs;Ncor2;Cd27;Xrcc1;Mapk8ip3;Sphk2;Shank3;Pygo2;Atat1;Trappc9;Scrib;Plxnb2;Mkl1;Bag6;Szt2;Zfp335;Tctn1;Ccdc85c;Aatk;Abl1;Abl2;Chrnb2;Apaf1;Aplp1;Aplp2;Nr2f2;App;Rhoa;Phox2a;Arnt2;Arx;Atm;Neurog2;Atp2b2;Atp7a;Atrn;Axin1;Bax;Bcan;Bcl2;Fabp7;Bmi1;Bmp2;Bmp4;Bmpr1a;Brca2;Btg2;C5ar1;Cacna1a;Aspm;Ctnna2;Ctnnb1;Cbln1;Cbs;Cckar;Cdh2;Cdk5;Cdk5r1;Chr…	27	Cdk5r2;Kat2a;Adgrg1;Hap1;Hspg2;Notch1;Numbl;Pcnt;Psen2;Ptprs;Ncor2;Cd27;Xrcc1;Mapk8ip3;Sphk2;Shank3;Pygo2;Atat1;Trappc9;Scrib;Plxnb2;Mkl1;Bag6;Szt2;Zfp335;Tctn1;Ccdc85c
GO:0010976	black	positive regulation of neuron projection development	BP	0.0679245	265	3.49785	Adnp;Cux2;Mark2;Hap1;Limk1;Numbl;Stk11;Map2k2;Shank3;Smurf1;Anapc2;Golga2;Plxnb2;Ppp2r5b;Zmynd8;Plxnb1;Megf8;Crtc1;Abl2;Ache;Adamts1;Adcyap1;Avil;Apbb1;Apoe;Arf1;Rnd2;Arsb;Atf1;Bdnf;Bmp4;Bmp5;Bmp7;Bmpr2;Camk2b;Cbfa2t2;Cd24a;Cdh4;Cnr1;Cntf;Cntn1;Cobl;Cpeb1;Cpne6;Crabp2;Crp;Cux1;Dcc;Dmd;Dscam;Dvl1;Eef1a1;Eef2k;Efna5;Eif4g2;Enc1;Epha3;Epha4;Epor;Bcl11a;Ezh2;Fes;Fgfr1;Fkbp1b;Fn1;Fxn;Fyn;Lpar1;Nr3c1;G…	18	Adnp;Cux2;Mark2;Hap1;Limk1;Numbl;Stk11;Map2k2;Shank3;Smurf1;Anapc2;Golga2;Plxnb2;Ppp2r5b;Zmynd8;Plxnb1;Megf8;Crtc1
GO:0007409	black	axonogenesis	BP	0.0613333	375	3.42983	Adnp;Dnm2;Mark2;Limk1;Nkx6-1;Notch1;Numbl;Stk11;Map2k2;Mapk8ip3;Pvrl1;Sptbn4;Anapc2;Golga2;Unc5b;Plxnb2;Ntng2;Szt2;Lingo1;Plxnb1;Megf8;Brsk1;Tctn1;Aatk;Abl1;Ache;Chrnb2;Actb;Agrn;Alcam;Ank3;Apbb1;Apbb2;Apc;Apoe;App;Rnd2;Artn;Arx;Neurog2;Bcl2;Bdnf;Bmp7;Bmpr1b;Bmpr2;Cacna1a;Ctnna2;Runx3;Cck;Cckar;Cdh11;Cdh2;Cdh4;Cdk5;Cdk5r1;Chl1;Cxcr4;Ccr5;Cnp;Cobl;Crabp2;Creb1;Crmp1;Dpysl2;Csf1r;Cttn;Dab1;Dag1;Dcl…	23	Adnp;Dnm2;Mark2;Limk1;Nkx6-1;Notch1;Numbl;Stk11;Map2k2;Mapk8ip3;Pvrl1;Sptbn4;Anapc2;Golga2;Unc5b;Plxnb2;Ntng2;Szt2;Lingo1;Plxnb1;Megf8;Brsk1;Tctn1
GO:0050769	black	positive regulation of neurogenesis	BP	0.0593824	421	3.40522	Adnp;Cux2;Mark2;Hap1;Limk1;Nkx2-2;Nkx6-1;Notch1;Numbl;Rara;Stk11;Tcf3;Map2k2;Mapk8ip3;Shank3;Smurf1;Anapc2;Golga2;Plxnb2;Ppp2r5b;Zmynd8;Plxnb1;Megf8;Zfp335;Crtc1;Abl2;Ace;Ache;Aspa;Adamts1;Adcyap1;Avil;Apbb1;Apoe;Arf1;Rhoa;Rnd2;Arsb;Atf1;Neurog2;Neurog3;Bcl2;Bcl6;Bdnf;Bmp2;Bmp4;Bmp5;Bmp6;Bmp7;Bmpr2;Bnip2;Tspo;Aspm;Camk2b;Ctnnb1;Cbfa2t2;Cd24a;Cdh4;Cxcr4;Ccr2;Ccr5;Cnr1;Cntf;Cntn1;Cobl;Cpeb1;Cpne6;C…	25	Adnp;Cux2;Mark2;Hap1;Limk1;Nkx2-2;Nkx6-1;Notch1;Numbl;Rara;Stk11;Tcf3;Map2k2;Mapk8ip3;Shank3;Smurf1;Anapc2;Golga2;Plxnb2;Ppp2r5b;Zmynd8;Plxnb1;Megf8;Zfp335;Crtc1
GO:0006661	black	phosphatidylinositol biosynthetic process	BP	0.111111	54	3.40351	Pigq;Inppl1;Pigo;Pigt;Pigs;Pgap3;Atm;Dpm1;Dpm2;Fgf2;Gpaa1;Htr2a;Htr2b;Pdgfa;Pdgfb;Piga;Pigf;Pik3ca;Pik3r1;Pip5k1c;Pip5k1b;Pip5k1a;Sh3yl1;Slc27a1;Pign;Pik3cg;Cdipt;Impa1;Pigb;Pigp;Alg5;Pigyl;Pyurf;Pigc;Pigm;Dpm3;Pigw;Pigx;Cds1;Pik3cb;Pi4k2a;Pigh;Pik3c3;Mppe1;Pigu;Pigv;Pgap2;Inpp4b;Plcg2;Pigz;Pgap1;Pigl;Pigk;Pigg	6	Pigq;Inppl1;Pigo;Pigt;Pigs;Pgap3
GO:0017016	black	Ras GTPase binding	MF	0.0689655	232	3.36174	Dvl2;Dvl3;Prkaca;Fmnl3;Inf2;Pak4;Rgl3;Ipo4;Rusc2;Exoc8;Sgsm3;Rap1gap;Llgl2;Cdc42bpb;Ipo13;Pkn1;Ankfy1;Ap1g1;Birc5;Bicd1;Anxa2;Cav1;Chm;Chml;Cit;Dapk3;Diaph1;Dvl1;Ect2;Ehd1;Eps8;Evi5;Fer;Srgap2;Gdi1;Slc6a4;Kpnb1;Kif16b;Kif3b;Arhgef2;Llgl1;Mllt4;Myo1c;Myo5a;Myo5b;Ncf2;Ndrg1;Ngfr;Nsf;Odf2;Pak1;Pak3;Pde6d;Pfn1;Prkch;Dennd5a;Rab7;Rabggtb;Rac1;Rab34;Rangap1;Rasgrf1;Ralbp1;Rock1;Rock2;Rph3a;Rtkn;Hps6;Ex…	16	Dvl2;Dvl3;Prkaca;Fmnl3;Inf2;Pak4;Rgl3;Ipo4;Rusc2;Exoc8;Sgsm3;Rap1gap;Llgl2;Cdc42bpb;Ipo13;Pkn1
GO:1901019	black	regulation of calcium ion transmembrane transporter activity	BP	0.109091	55	3.34838	Cacnb1;Cacnb3;Hap1;Hspa2;Slc9a1;Jph3;Atp1b1;Bmp4;Cacnb2;Cacnb4;Casq2;Crhr1;Dmd;Drd2;Fgf14;Fkbp1a;Fkbp1b;Gnb5;Gsto1;Htt;Hrc;Myo5a;Oprl1;Pde4b;Pkd2;Plcg1;Pln;Ppp2ca;Rgn;Ryr2;S100a1;Stac;Stim1;Sumo1;Pla2g6;Ubqln1;Kcne3;Jph2;Asph;Ahnak;Gstm7;Nos1ap;Jsrp1;Tlr9;Atp1a2;Sri;Ank2;Stim2;Nppa;Plcg2;Akap6;Pde4d;Kcne2;Cracr2a;Cbarp	6	Cacnb1;Cacnb3;Hap1;Hspa2;Slc9a1;Jph3
GO:0019902	black	phosphatase binding	MF	0.0747126	174	3.34609	Cacna1c;Csk;Kat2a;Pik3r2;Shc1;Slc9a1;Traf3;Tsc2;Hsf4;Mapk3;Sptbn4;Strn4;Ppp2r4;Akap1;Akt1;Ap3b1;Bad;Bcl2;Cacna1b;Ctnnb1;Ctnnd1;Cdh1;Cdh2;Cdh5;Cdkn1b;Cpd;Cry1;Cry2;Csf1r;Vcan;Ctsc;Dlg1;Dlg4;Drd1;Egfr;Eif2ak3;Eif4ebp1;Ell;Erbb2;Fer;Flt4;Ghr;Rack1;Grb2;Hmgcr;Hsp90aa1;Insr;Itpr1;Jak1;Jak3;Jup;Kcnn4;Kcnq1;Lck;Lmna;Smad2;Smad3;Met;Mapt;Mast2;Ppp1r15a;Ncam1;Nek2;Igbp1;Pik3r1;Ppara;Pparg;Ppp1ca;Ppp1cc;Pp…	13	Cacna1c;Csk;Kat2a;Pik3r2;Shc1;Slc9a1;Traf3;Tsc2;Hsf4;Mapk3;Sptbn4;Strn4;Ppp2r4
GO:0043161	black	proteasome-mediated ubiquitin-dependent protein catabolic process	BP	0.0628931	318	3.31508	Gna12;Psen2;Rbck1;Sgta;Ubqln2;Fzr1;Ube4b;Rnf126;Usp19;Kctd17;Syvn1;Xrcc3;Smurf1;Ubqln4;Csnk1d;Mta1;Agap3;Bag6;Fbxl19;Gsk3a;Akt1;Apc;Birc2;Araf;Arntl;Atm;Aup1;Axin1;Btrc;Bub1;Bub1b;Cbfa2t3;Ccnf;Cd2ap;Clock;Clu;Plk3;Csnk2a1;Csnk2a2;Dab2;Ddb1;Ddit3;Dvl1;Fhit;Gba;Gclc;Rack1;Hfe;Mad1l1;Smad7;Mdm2;Psmd7;Mtm1;Commd1;Nfe2l2;Pcbp2;Plk1;Pml;Ppp2cb;Psen1;Psmb5;Psmc1;Psmc2;Psmc3;Psmc5;Psmd4;Pten;Rad23a;Rad23…	20	Gna12;Psen2;Rbck1;Sgta;Ubqln2;Fzr1;Ube4b;Rnf126;Usp19;Kctd17;Syvn1;Xrcc3;Smurf1;Ubqln4;Csnk1d;Mta1;Agap3;Bag6;Fbxl19;Gsk3a
GO:0031060	black	regulation of histone methylation	BP	0.107143	56	3.29451	Paxip1;Pygo2;Ehmt2;Kdm4b;Auts2;Zfp335;Brca1;Ctnnb1;Ctcf;Dnmt1;Dnmt3b;Eed;Gata3;Gcg;Gfi1;Jarid2;Smad4;Mecp2;Men1;Mtf2;Mthfr;Myb;Nsd1;Smarcb1;Supt6;Phf1;Ctr9;Xbp1;Nelfa;H2afy;Tet1;Paf1;Wdr61;Snw1;Paxbp1;Fendrr;Pih1d1;Bcor;Setd7;Iws1;Dppa2;Phf19;Asxl2;Kmt2b;Rtf1;Kdm4c;Sirt1;Kdm1a;Airn;Kdm3a;Ogt;Rnf20;Kmt2a;Kdm4a;Kdm4d;Ctcfl	6	Paxip1;Pygo2;Ehmt2;Kdm4b;Auts2;Zfp335
GO:0003714	black	transcription corepressor activity	MF	0.0791367	139	3.28983	Ctbp1;Atn1;Rara;Ncor2;Tle2;Zfpm1;Sirt6;Pex14;Gps2;Pias4;Mta1;Aebp1;Aebp2;Smyd1;C1qbp;Runx1t1;Cbfa2t2;Cbfa2t3;Ccnd1;Cdx2;Cdyl;Cops2;Crym;Ctbp2;Daxx;Ddit3;Dnmt3b;Elk3;Erf;Bcl11a;Aes;Hdac3;Hdac5;Hdgf;Hipk1;Hipk2;Hipk3;Hr;Ajuba;Cited2;Nfib;Nsd1;Mybbp1a;Pou1f1;Prox1;Uri1;Ncor1;Foxp3;Sin3a;Sin3b;Ski;Skil;Smarca4;Bhlhe40;Tbl1x;Tbx15;Tcf4;Trim28;Tle1;Tle4;Tob1;Tsg101;Uxt;Wnt4;Yap1;Zfpm2;Zhx1;Nr0b2;Casp8a…	11	Ctbp1;Atn1;Rara;Ncor2;Tle2;Zfpm1;Sirt6;Pex14;Gps2;Pias4;Mta1
GO:0048588	black	developmental cell growth	BP	0.0714286	196	3.28678	Adnp;Dnm2;Limk1;Nkx6-1;Rarg;Stk11;Sirt6;Ddx39b;Smurf1;Anapc2;Plxnb1;Megf8;Kmt2d;Gsk3a;Aatk;Abl1;Adrb1;Agt;Slc25a4;Apoe;App;Rnd2;Bdnf;Bmpr2;Cdh4;Cdk5;Cdk5r1;Ccr5;Cobl;Col14a1;Cpne6;Crabp2;Dpysl2;Cttn;Dclk1;Dcx;Dscam;Dvl1;Efna5;Epha7;Bcl11a;Fgf13;Fn1;Fxn;G6pdx;Gal;Gata4;Gdf9;Nr3c1;Hdac6;Hnrnpk;Prmt2;Ifrd1;Ilk;Impact;Itgb1;L1cam;Lamb2;Map1b;Mapt;Ndn;Ngf;Nin;Nrp1;Nrp2;Ntn1;Ntrk3;Omg;Pafah1b1;Prkcz;Pl…	14	Adnp;Dnm2;Limk1;Nkx6-1;Rarg;Stk11;Sirt6;Ddx39b;Smurf1;Anapc2;Plxnb1;Megf8;Kmt2d;Gsk3a
GO:0032091	black	negative regulation of protein binding	BP	0.0972222	72	3.25056	Adnp;Psen2;Zfpm1;Mapk3;Pex14;Golga2;Wfikkn1;Ace;Adam15;Adrb2;B2m;Bax;Anxa2;Cav1;Cdkn2a;Ckmt1;Dab2;Dvl1;Aes;Hfe;Hnrnpk;Id1;Ifit2;Il10;Isl1;Itga4;Itgb1bp1;Lef1;Lrpap1;Myc;Pdgfb;Pim2;Ppara;Ptprf;Rock1;Ruvbl2;Slpi;Sorl1;Aurkb;Aurka;Tdg;Plscr1;Pin1;Mapk8;Csnk1e;Camk1;Tfip11;Stub1;Gsk3b;Park7;Carm1;Dact1;Ralb;Lrrk2;Ppp1r2;Ctnnbip1;Mitd1;Gtpbp4;Spag9;Crtac1;Nfatc4;Senp2;Tex14;Kdm1a;Tmbim6;Usp33;Arrb2;Tm…	7	Adnp;Psen2;Zfpm1;Mapk3;Pex14;Golga2;Wfikkn1
GO:0001046	black	core promoter sequence-specific DNA binding	MF	0.0857143	105	3.24661	Zfhx3;Maz;Taf1c;Hnf1a;Wbp2;Zfpm1;Cdk9;Mta1;Zfp335;Arntl;Atf4;Runx2;Clock;Crem;Cry1;Egr1;Esr1;Ezh2;Fos;Gata1;Gata2;Gata3;Gata6;H3f3a;H3f3b;Hdac2;Hdac5;Hnf4a;Hoxb3;Hsf1;Hsf2;Smad1;Smad5;Mef2c;Meox1;Mitf;Mtf1;Myc;Nfatc1;Nfil3;Nfya;Nr4a3;Nsd1;Nr4a2;Pax6;Pax8;Pdx1;Pparg;Prox1;Rbpj;Rest;Rora;Ruvbl2;Spi1;Smarca4;Smarcb1;Sox11;Sox4;Sox8;Sox9;Sp1;Sp3;Stat1;Stat5a;Stat5b;Stat6;Taf1b;Tal1;Tbp;Tbr1;Tcf7l2;Ub…	9	Zfhx3;Maz;Taf1c;Hnf1a;Wbp2;Zfpm1;Cdk9;Mta1;Zfp335
GO:0003279	black	cardiac septum development	BP	0.0898876	89	3.21543	Dnm2;Dvl3;Lrp1;Nprl3;Notch1;Rara;Zfpm1;Fuz;Acvr1;Prdm1;Cxcr4;Fgfr2;Fzd1;Gata3;Gata4;Gata6;Gja5;Lrp2;Hes1;Hey1;Hey2;Ndst1;Id2;Cyr61;Isl1;Jag1;Kif7;Lmo4;Lrp6;Smad4;Smad6;Smad7;Matr3;Mdm2;Mdm4;Cited2;Nfatc1;Notch2;Pcsk5;Prox1;Robo1;Dhrs3;Smarca4;Sox11;Sox4;Stra6;Tbx1;Tbx2;Tbx3;Tgfb2;Ift88;Trp53;Wnt11;Wnt5a;Zbtb14;Zfpm2;Dand5;Sufu;Cntrl;Heyl;Parva;Sall1;Dctn5;Sav1;Tab1;Plxnd1;Ptk7;Ap2b1;2410089E03Rik…	8	Dnm2;Dvl3;Lrp1;Nprl3;Notch1;Rara;Zfpm1;Fuz
GO:0030135	black	coated vesicle	CC	0.0806452	124	3.20317	Dnm2;Dvl2;Lrp1;Furin;Hip1r;Tnk2;Sec31a;Scyl1;Golga2;Fam109a;Ap1g1;Ap1s1;App;Arf1;Rab27a;Atp7a;Ctla4;Clta;Copa;Cpne6;Dab2;Dvl1;Edn1;Epn2;Eps15;Htt;Hspd1;Idua;Igf2r;Lyz2;Lyz1;Rab8a;Myo6;Ngfr;Numb;Sec23a;Slc2a4;Snap91;Sort1;Tex261;Trf;Tgoln1;Vamp2;Vamp3;Vwf;Hax1;Pacsin1;Sec23b;Bcap31;Golga5;Spg21;Copb2;Vti1a;Copg2;Copg1;Snx3;Uso1;Tmed2;Copz2;Copz1;Rgs19;Cope;Slc5a7;Nrgn;Cubn;Tmed3;Necap2;Snx9;Yipf5;…	10	Dnm2;Dvl2;Lrp1;Furin;Hip1r;Tnk2;Sec31a;Scyl1;Golga2;Fam109a
GO:0021510	black	spinal cord development	BP	0.103448	58	3.19037	Nkx2-2;Nkx6-1;Ptprs;Med12;Fuz;Tctn1;Akt1;Phox2a;Cacna1a;Chrd;Dcc;Dll1;Ercc2;Evx1;Gata2;Gdf11;Gli2;Gli3;Nkx6-2;Mnx1;Isl1;Lhx1;Lhx3;Lhx4;Lmo4;Ascl1;Nf1;Pax6;Pbx3;Ptch1;Rab23;Reln;Shh;Ighmbp2;Sox11;Sox12;Sox4;Tal1;Ift88;Tulp3;Zpr1;Sufu;Cln8;Abt1;Dll4;Mtor;Ift172;Draxin;Rfx4;Ift122;Dync2h1;Dicer1;Gigyf2;Gbx1;Gdpd5;Phgdh;Smo;Intu	6	Nkx2-2;Nkx6-1;Ptprs;Med12;Fuz;Tctn1
GO:0045732	black	positive regulation of protein catabolic process	BP	0.0718232	181	3.18791	Psen2;Apc2;Sgta;Ubqln2;Fzr1;Osbpl7;Smurf1;Csnk1d;Sgsm3;Gga1;Bag6;Rnf40;Gga3;Adam8;Adam9;Adra2a;Akt1;Apc;Apoe;Atpif1;Axin1;Cbfa2t3;Cd81;Clu;Plk3;Csnk2a1;Ctsc;Dab2;Dvl1;Egf;Ptk2;Gba;Gja1;Gclc;Rack1;Gpc3;Gpld1;Ier3;Il1b;Itch;Smad7;Mdm2;Msn;Nedd4;Nsf;Oaz1;Oaz2;Plk1;Psen1;Pten;Ptk2b;Rab7;Rb1;Rdx;Rgn;Trim30a;Sec22b;Sumo3;Plk2;Sorl1;Sox17;Sox9;Aurka;Tnf;Tnfaip3;Tnfrsf1b;Tnfsf12;Sumo1;Usp5;Ezr;Vip;Wnt5a;…	13	Psen2;Apc2;Sgta;Ubqln2;Fzr1;Osbpl7;Smurf1;Csnk1d;Sgsm3;Gga1;Bag6;Rnf40;Gga3
GO:0010769	black	regulation of cell morphogenesis involved in differentiation	BP	0.0611621	327	3.18016	Adnp;Cux2;Dnm2;Mark2;Limk1;Nkx6-1;Notch1;Numbl;Stk11;Map2k2;Shank3;Fuz;Bcl9l;Pofut2;Anapc2;Golga2;Plxnb2;Plxnb1;Sarm1;Megf8;Aatk;Abl1;Ache;Chrnb2;Ager;Agrn;Apoa1;Apoe;Rnd2;Neurog3;Axin2;Bdnf;Bmp2;Bmpr2;C1qbp;Cacna1a;Calr;Camk2b;Ctnnb1;Cdh2;Cdh4;Cdk5;Cdk5r1;Cfl1;Cit;Cited1;Ccr5;Col1a1;Crabp2;Dpysl2;Cttn;Cux1;Dab1;Dab2;Dag1;Dscam;Eef2k;Efna1;Efna5;Dmtn;Epha3;Epha4;Epha7;Ephb2;Ephb3;Bcl11a;Ezh2;Ptk2…	20	Adnp;Cux2;Dnm2;Mark2;Limk1;Nkx6-1;Notch1;Numbl;Stk11;Map2k2;Shank3;Fuz;Bcl9l;Pofut2;Anapc2;Golga2;Plxnb2;Plxnb1;Sarm1;Megf8
GO:0042176	black	regulation of protein catabolic process	BP	0.0611621	327	3.18016	Gna12;Furin;Prkaca;Psen2;Psmd3;Apc2;Sgta;Ubqln2;Fzr1;Osbpl7;Usp19;Xrcc3;Smurf1;Ubqln4;Csnk1d;Sgsm3;Gga1;Bag6;Rnf40;Gga3;Adam8;Adam9;Adra2a;Akt1;Apc;Apoe;Araf;Arntl;Atm;Atpif1;Axin1;Btrc;Bub1;Bub1b;Anxa2;Cbfa2t3;Cd81;Cdc42;Cdkn2a;Clu;Plk3;Csnk2a1;Csnk2a2;Cst3;Ctsc;Dab2;Dvl1;Egf;Egfr;Rhbdf1;Ptk2;Faf1;Fhit;Fyn;Gba;Gja1;Gclc;Rack1;Gpc3;Gpld1;Gpx1;Grin2a;Grin2c;Hfe;Ier3;Il10;Il1b;Ins2;Itch;Mad1l1;Smad…	20	Gna12;Furin;Prkaca;Psen2;Psmd3;Apc2;Sgta;Ubqln2;Fzr1;Osbpl7;Usp19;Xrcc3;Smurf1;Ubqln4;Csnk1d;Sgsm3;Gga1;Bag6;Rnf40;Gga3
GO:0008286	black	insulin receptor signaling pathway	BP	0.0888889	90	3.17871	Eif4ebp2;Inppl1;Pik3r2;Shc1;Srebf1;Tsc2;Ncoa5;Gsk3a;Ahsg;Akt1;Akt2;Cav2;Cish;Socs3;Socs1;Bcar1;Eif4ebp1;Fer;Foxc2;Gpld1;Grb10;Grb2;Igf2;Il1b;Ins2;Insr;Irs1;Irs3;Irs4;Kl;Mstn;Pdk2;Enpp1;Pik3r1;Pik3r3;Prkca;Prkcb;Prkcd;Prkcq;Prkcz;Plcb1;Inpp5k;Ptpn1;Ptpn2;Ptpra;Ptpre;Ptprf;Rbm4;Rela;Nr1h4;Srsf3;Zfp106;Sorbs1;Smarcc1;Src;Stxbp4;Ybx1;Sh2b2;Pdk4;Grb14;Nucb2;Foxo4;Slc2a8;Foxo1;Tsc1;Baiap2l1;Fam132a;Lmb…	8	Eif4ebp2;Inppl1;Pik3r2;Shc1;Srebf1;Tsc2;Ncoa5;Gsk3a
GO:0034704	black	calcium channel complex	CC	0.113636	44	3.16814	Cacna1c;Cacnb1;Cacnb3;Hspa2;Ppp2r4;Cacna1a;Cacna1b;Cacna1d;Cacna1e;Cacna2d1;Cacna2d3;Cacnb2;Cacnb4;Cacng1;Cacng2;Fkbp1b;Pde4b;Ppm1a;Ryr2;Trpc4;Trpc5;Cacng4;Cacna1f;Cacna2d2;Cacna1h;Herpud1;Ccdc109b;Micu2;Smdt1;Nos1ap;Catsperg2;Catsper3;Catsperd;Camk2d;Pkd1l1;Catsper2;Mcu;Micu1;Sestd1;Akap6;Pde4d;Cacna2d4;Catsperg1;Catsper4	5	Cacna1c;Cacnb1;Cacnb3;Hspa2;Ppp2r4
GO:0038083	black	peptidyl-tyrosine autophosphorylation	BP	0.113636	44	3.16814	Ddr1;Csk;Mapk3;Tnk2;Tyk2;Aatk;Abl1;Abl2;Ace;Bmx;Btk;Ctnnd1;Cav1;Ptk2;Fer;Fes;Fgr;Frk;Fyn;Hck;Igf1r;Insr;Itk;Jak1;Jak2;Jak3;Kdr;Lck;Lyn;Matk;Ptk2b;Ros1;Ptk6;Src;Srms;Syk;Tec;Txk;Vegfa;Yes1;Zap70;Grem1;Tnk1;Styk1	5	Ddr1;Csk;Mapk3;Tnk2;Tyk2
GO:0005096	black	GTPase activator activity	MF	0.0675676	222	3.16652	Arhgef1;Nprl3;Sipa1;Tsc2;Arhgap23;Tbc1d13;Sipa1l3;Tbc1d9b;Sgsm3;Rap1gap;Agap3;Git1;Llgl2;Arhgap33;Tbc1d2;Arhgap5;Arhgap6;Arhgdib;Axin1;Axin2;Arhgap31;Chm;Chml;Asap1;Ect2;Evi5;Srgap2;Gdi1;Gdi2;Arhgdig;Gnaq;Gnb5;Agfg1;Htr2b;Jun;Llgl1;Myo9b;Nf1;Plcb1;Ranbp1;Rangap1;Rasa3;Rasal1;Rgs16;Rgs2;Rgs4;Rgs5;Rgs9;Ralbp1;Rp2;Thy1;Wnt11;Tiam2;Rgs7;Git2;Racgap1;Rabgap1l;Iqgap1;Dlc1;Rgs1;Rgs6;Rgs3;Rgs11;Rgs14;Ras…	15	Arhgef1;Nprl3;Sipa1;Tsc2;Arhgap23;Tbc1d13;Sipa1l3;Tbc1d9b;Sgsm3;Rap1gap;Agap3;Git1;Llgl2;Arhgap33;Tbc1d2
GO:0035107	black	appendage morphogenesis	BP	0.0793651	126	3.14586	Gna12;Lrp5;Notch1;Pcnt;Psen2;Rarg;Hnf1a;Fuz;Megf8;Acd;Alx4;Atp7a;Bak1;Bax;Bcl2l11;Bmp4;Bmp7;Bmpr1a;Bmpr1b;Ctnnb1;Runx2;Col2a1;Crabp2;Dlx6;Mecom;Fbn2;Fgf9;Fgfr1;Fgfr2;Fmn1;Fzd6;Gas1;Gdf5;Gja1;Gja5;Gli2;Gli3;Gnaq;Gnas;Gpc3;Hand2;Hdac2;Idua;Ihh;Aff3;Lef1;Lmx1b;Lrp6;Smad4;Msx1;Mycn;Notch2;Pbx1;Pbx2;Pcsk5;Prrx1;Med1;Psen1;Ptch1;Rab23;Aldh1a2;Prrx2;Sfrp2;Shh;Shox2;Ski;Smarca4;Sox11;Sox4;Tbx2;Tbx3;Ift88…	10	Gna12;Lrp5;Notch1;Pcnt;Psen2;Rarg;Hnf1a;Fuz;Megf8;Acd
GO:0035108	black	limb morphogenesis	BP	0.0793651	126	3.14586	Gna12;Lrp5;Notch1;Pcnt;Psen2;Rarg;Hnf1a;Fuz;Megf8;Acd;Alx4;Atp7a;Bak1;Bax;Bcl2l11;Bmp4;Bmp7;Bmpr1a;Bmpr1b;Ctnnb1;Runx2;Col2a1;Crabp2;Dlx6;Mecom;Fbn2;Fgf9;Fgfr1;Fgfr2;Fmn1;Fzd6;Gas1;Gdf5;Gja1;Gja5;Gli2;Gli3;Gnaq;Gnas;Gpc3;Hand2;Hdac2;Idua;Ihh;Aff3;Lef1;Lmx1b;Lrp6;Smad4;Msx1;Mycn;Notch2;Pbx1;Pbx2;Pcsk5;Prrx1;Med1;Psen1;Ptch1;Rab23;Aldh1a2;Prrx2;Sfrp2;Shh;Shox2;Ski;Smarca4;Sox11;Sox4;Tbx2;Tbx3;Ift88…	10	Gna12;Lrp5;Notch1;Pcnt;Psen2;Rarg;Hnf1a;Fuz;Megf8;Acd
GO:0005765	black	lysosomal membrane	CC	0.0731707	164	3.13305	Abca2;Ap3d1;Atp6v0d1;Gaa;Gnb2;Lrp1;Atp6v0a2;Sphk2;Sppl2b;Mfsd12;Pqlc2;Daglb;Ankfy1;Anxa6;Ap3b1;Atp6v1a;Atp6v1b2;Atp6v1e1;Atp6v0c;Anxa2;Scarb2;Cd63;Clcn5;Cln3;Col6a1;Cp;Dnajc5;Dpp4;Egf;Enpep;Flot1;Gba;Gdap2;Gfap;Gna11;Gnai1;Gnai3;Gnaq;Gnb1;Gnb4;Lrp2;Gpld1;H2-Eb1;H2-DMa;H2-DMb2;Hspa8;Hsp90ab1;Lamp1;Lamp2;Anpep;Laptm5;Mylpf;Myo7a;Npc1;Slc11a2;Nsf;Gpr143;P2rx4;Enpp1;Pld1;Ctsa;Psen1;Rab5c;Rab7;Slc12a4…	12	Abca2;Ap3d1;Atp6v0d1;Gaa;Gnb2;Lrp1;Atp6v0a2;Sphk2;Sppl2b;Mfsd12;Pqlc2;Daglb
GO:0098852	black	lytic vacuole membrane	CC	0.0731707	164	3.13305	Abca2;Ap3d1;Atp6v0d1;Gaa;Gnb2;Lrp1;Atp6v0a2;Sphk2;Sppl2b;Mfsd12;Pqlc2;Daglb;Ankfy1;Anxa6;Ap3b1;Atp6v1a;Atp6v1b2;Atp6v1e1;Atp6v0c;Anxa2;Scarb2;Cd63;Clcn5;Cln3;Col6a1;Cp;Dnajc5;Dpp4;Egf;Enpep;Flot1;Gba;Gdap2;Gfap;Gna11;Gnai1;Gnai3;Gnaq;Gnb1;Gnb4;Lrp2;Gpld1;H2-Eb1;H2-DMa;H2-DMb2;Hspa8;Hsp90ab1;Lamp1;Lamp2;Anpep;Laptm5;Mylpf;Myo7a;Npc1;Slc11a2;Nsf;Gpr143;P2rx4;Enpp1;Pld1;Ctsa;Psen1;Rab5c;Rab7;Slc12a4…	12	Abca2;Ap3d1;Atp6v0d1;Gaa;Gnb2;Lrp1;Atp6v0a2;Sphk2;Sppl2b;Mfsd12;Pqlc2;Daglb
GO:0030326	black	embryonic limb morphogenesis	BP	0.0825688	109	3.11813	Gna12;Lrp5;Notch1;Psen2;Rarg;Hnf1a;Fuz;Megf8;Acd;Alx4;Bax;Bcl2l11;Bmp4;Bmp7;Bmpr1a;Ctnnb1;Runx2;Crabp2;Dlx6;Mecom;Fbn2;Fgf9;Fgfr1;Fzd6;Gas1;Gdf5;Gja1;Gja5;Gli2;Gli3;Gnaq;Gnas;Gpc3;Hand2;Hdac2;Ihh;Aff3;Lef1;Lmx1b;Lrp6;Smad4;Msx1;Mycn;Notch2;Pbx1;Pbx2;Prrx1;Med1;Psen1;Ptch1;Rab23;Aldh1a2;Prrx2;Sfrp2;Shh;Shox2;Ski;Smarca4;Tbx2;Tbx3;Ift88;Tulp3;Twist1;Wnt3;Wnt5a;Grem1;Ror2;B9d1;Fbxw4;Reck;Lmbr1;Sall1…	9	Gna12;Lrp5;Notch1;Psen2;Rarg;Hnf1a;Fuz;Megf8;Acd
GO:0035113	black	embryonic appendage morphogenesis	BP	0.0825688	109	3.11813	Gna12;Lrp5;Notch1;Psen2;Rarg;Hnf1a;Fuz;Megf8;Acd;Alx4;Bax;Bcl2l11;Bmp4;Bmp7;Bmpr1a;Ctnnb1;Runx2;Crabp2;Dlx6;Mecom;Fbn2;Fgf9;Fgfr1;Fzd6;Gas1;Gdf5;Gja1;Gja5;Gli2;Gli3;Gnaq;Gnas;Gpc3;Hand2;Hdac2;Ihh;Aff3;Lef1;Lmx1b;Lrp6;Smad4;Msx1;Mycn;Notch2;Pbx1;Pbx2;Prrx1;Med1;Psen1;Ptch1;Rab23;Aldh1a2;Prrx2;Sfrp2;Shh;Shox2;Ski;Smarca4;Tbx2;Tbx3;Ift88;Tulp3;Twist1;Wnt3;Wnt5a;Grem1;Ror2;B9d1;Fbxw4;Reck;Lmbr1;Sall1…	9	Gna12;Lrp5;Notch1;Psen2;Rarg;Hnf1a;Fuz;Megf8;Acd
GO:0050770	black	regulation of axonogenesis	BP	0.0727273	165	3.10965	Adnp;Dnm2;Mark2;Limk1;Nkx6-1;Stk11;Map2k2;Anapc2;Golga2;Plxnb2;Plxnb1;Megf8;Aatk;Abl1;Ache;Agrn;Apoe;Rnd2;Bdnf;Bmpr2;Cacna1a;Cdh2;Cdh4;Cdk5;Cdk5r1;Ccr5;Crabp2;Dpysl2;Cttn;Dab1;Dscam;Efna1;Efna5;Epha4;Epha7;Ephb2;Ephb3;Bcl11a;Ptk2;Fgf13;Fn1;Fxn;Gdi1;Grin1;Ifrd1;Ilk;Kif13b;L1cam;Map1b;Map2;Mapt;Nefl;Nefm;Ngf;Nin;Nrp1;Ntn1;Ntrk2;Ntrk3;Omg;Pafah1b1;Plxna1;Plxna2;Plxna3;Psen1;Pten;Ret;Robo1;Ryk;Cxcl12…	12	Adnp;Dnm2;Mark2;Limk1;Nkx6-1;Stk11;Map2k2;Anapc2;Golga2;Plxnb2;Plxnb1;Megf8
GO:0001190	black	transcriptional activator activity, RNA polymerase II transcription factor binding	MF	0.111111	45	3.10614	Atn1;Notch1;Wbp2;Med12;Mkl1;Arntl;Cited1;Clock;Creb1;Foxh1;Hipk2;Hyal2;Isl1;Klf4;Lmo2;Mef2a;Cited2;Myt1l;Neurod1;Nfe2l1;Pou1f1;Prrx1;Pou3f1;Ppara;Nr1h4;Smarca4;Sox10;Sox11;Sox12;Sox4;Trim28;Cited4;Sall1;Wwp2;Smarca2;Rere;Med6;Wwox;Psip1;Ankrd1;Myocd;Mkl2;Jade1;Med12l;Klf14	5	Atn1;Notch1;Wbp2;Med12;Mkl1
GO:0098811	black	transcriptional repressor activity, RNA polymerase II activating transcription factor binding	MF	0.111111	45	3.10614	Atn1;Notch1;Wbp2;Med12;Mkl1;Arntl;Cited1;Clock;Creb1;Foxh1;Hipk2;Hyal2;Isl1;Klf4;Lmo2;Mef2a;Cited2;Myt1l;Neurod1;Nfe2l1;Pou1f1;Prrx1;Pou3f1;Ppara;Nr1h4;Smarca4;Sox10;Sox11;Sox12;Sox4;Trim28;Cited4;Sall1;Wwp2;Smarca2;Rere;Med6;Wwox;Psip1;Ankrd1;Myocd;Mkl2;Jade1;Med12l;Klf14	5	Atn1;Notch1;Wbp2;Med12;Mkl1
GO:2000573	black	positive regulation of DNA biosynthetic process	BP	0.111111	45	3.10614	Mapk3;Ddx39b;Pnkp;Prkd2;Acd;Gfer;C3ar1;Ctnnb1;Cct2;Cct4;Cyp1b1;Egf;Fgfr4;Hgf;Klf4;Mapkapk5;Myc;Nek2;Pak3;Pdgfb;Pdgfrb;Prkcq;Pkib;Ptk2b;Src;Aurkb;Tcp1;Tnks;Grem1;Map2k7;Map3k4;Mapk1;Nox4;Gsk3b;Nek7;Nvl;Pot1a;Obfc1;Wrap53;Arrb2;Hmbox1;Parm1;Dkc1;Grhl2;Mapk15	5	Mapk3;Ddx39b;Pnkp;Prkd2;Acd
GO:0031329	black	regulation of cellular catabolic process	BP	0.054878	492	3.10397	Kat2a;Gna12;Furin;Pik3r2;Prkaca;Psen2;Srebf1;Stk11;Tsc2;Mapk3;Sirt6;Sgta;Ubqln2;Pnpla2;Osbpl7;Usp19;Dhx34;Xrcc3;Smurf1;Trim8;Ubqln4;Golga2;Csnk1d;Ehmt2;Bag6;Rnf40;Gsk3a;Actn3;Adam8;Adam9;Adra1b;Adra2a;Adrb2;Ager;Akt1;Akt2;Apaf1;Apc;Atg5;Apoa1;Apoc3;Apoe;Apoh;Araf;Atm;Atp6v0a1;Atpif1;Axin1;Bax;Bcl2;Bnip3;Bnip3l;Bpgm;Zfp36l2;Btg2;Btrc;Bub1;Bub1b;Tspo;Anxa2;Casp1;Cbfa2t3;Rb1cc1;Entpd5;Cd81;Cdkn2a;Ci…	27	Kat2a;Gna12;Furin;Pik3r2;Prkaca;Psen2;Srebf1;Stk11;Tsc2;Mapk3;Sirt6;Sgta;Ubqln2;Pnpla2;Osbpl7;Usp19;Dhx34;Xrcc3;Smurf1;Trim8;Ubqln4;Golga2;Csnk1d;Ehmt2;Bag6;Rnf40;Gsk3a
GO:0061564	black	axon development	BP	0.0575	400	3.09725	Adnp;Dnm2;Mark2;Limk1;Nkx6-1;Notch1;Numbl;Stk11;Map2k2;Mapk8ip3;Pvrl1;Sptbn4;Anapc2;Golga2;Unc5b;Plxnb2;Ntng2;Szt2;Lingo1;Plxnb1;Megf8;Brsk1;Tctn1;Aatk;Abl1;Ache;Chrnb2;Actb;Agrn;Alcam;Ank3;Apbb1;Apbb2;Apc;Apoe;App;Rnd2;Artn;Arx;Neurog2;Bcl2;Bdnf;Bmp7;Bmpr1b;Bmpr2;Cacna1a;Ctnna2;Runx3;Cck;Cckar;Cdh11;Cdh2;Cdh4;Cdk5;Cdk5r1;Chl1;Cxcr4;Ccr5;Cnp;Cnr1;Cntf;Cobl;Crabp2;Creb1;Crmp1;Dpysl2;Csf1r;Cttn;Dab…	23	Adnp;Dnm2;Mark2;Limk1;Nkx6-1;Notch1;Numbl;Stk11;Map2k2;Mapk8ip3;Pvrl1;Sptbn4;Anapc2;Golga2;Unc5b;Plxnb2;Ntng2;Szt2;Lingo1;Plxnb1;Megf8;Brsk1;Tctn1
GO:1903362	black	regulation of cellular protein catabolic process	BP	0.0679612	206	3.08163	Gna12;Furin;Prkaca;Psen2;Sgta;Ubqln2;Osbpl7;Usp19;Xrcc3;Smurf1;Ubqln4;Csnk1d;Bag6;Rnf40;Akt1;Apc;Apoe;Araf;Atm;Atpif1;Axin1;Btrc;Bub1;Bub1b;Anxa2;Cbfa2t3;Cd81;Cdkn2a;Clu;Plk3;Csnk2a1;Csnk2a2;Ctsc;Dab2;Dvl1;Egf;Rhbdf1;Ptk2;Fhit;Gba;Gclc;Rack1;Gpx1;Hfe;Mad1l1;Smad7;Mdm2;Msn;Mtm1;Commd1;Prkcg;Pkd1;Plk1;Pml;Psen1;Psme1;Psme2;Psme3;Pten;Ptk2b;Rad23a;Rad23b;Rb1;Rdx;Rgn;Shh;Stil;Smarcc1;Sumo3;Plk2;Aurka…	14	Gna12;Furin;Prkaca;Psen2;Sgta;Ubqln2;Osbpl7;Usp19;Xrcc3;Smurf1;Ubqln4;Csnk1d;Bag6;Rnf40
GO:1903050	black	regulation of proteolysis involved in cellular protein catabolic process	BP	0.0698925	186	3.07932	Gna12;Prkaca;Psen2;Sgta;Ubqln2;Osbpl7;Usp19;Xrcc3;Smurf1;Ubqln4;Csnk1d;Bag6;Rnf40;Akt1;Apc;Araf;Atm;Atpif1;Axin1;Btrc;Bub1;Bub1b;Cbfa2t3;Cdkn2a;Clu;Plk3;Csnk2a1;Csnk2a2;Ctsc;Dab2;Dvl1;Egf;Rhbdf1;Ptk2;Fhit;Gba;Gclc;Rack1;Gpx1;Hfe;Mad1l1;Smad7;Mdm2;Mtm1;Commd1;Prkcg;Pkd1;Plk1;Pml;Psen1;Psme1;Psme2;Psme3;Pten;Ptk2b;Rad23a;Rad23b;Rb1;Rgn;Shh;Stil;Smarcc1;Sumo3;Plk2;Aurka;Terf1;Ubb;Ube3a;Sumo1;Usp5;Wn…	13	Gna12;Prkaca;Psen2;Sgta;Ubqln2;Osbpl7;Usp19;Xrcc3;Smurf1;Ubqln4;Csnk1d;Bag6;Rnf40
GO:0016055	black	Wnt signaling pathway	BP	0.0598802	334	3.07815	Dvl2;Dvl3;Mark2;Lrp1;Lrp5;Notch1;Stk11;Hnf1a;Thra;Tle2;Tle3;Tsc2;Apc2;Pias4;Med12;Pygo2;Fuz;Bcl9l;Csnk1d;Gsk3a;Abl1;Abl2;Macf1;Apc;Xiap;Arntl;Atp6v0c;Axin1;Axin2;Bcl7b;Bmp2;Btrc;Aspm;Ctnnb1;Ctnnd1;Cav1;Ccnd1;Ccne1;Cd44;Cdc42;Cdh1;Cdh2;Cdh3;Celsr1;Col1a1;Cpe;Csnk2a1;Csnk2a2;Csnk2b;Dab2;Dapk3;Ddb1;Ddit3;Ddx3x;Drd2;Dvl1;Eda;Egf;Egr1;Emd;Lgr5;Fgf2;Fgf9;Fgfr2;Fgfr3;Foxl1;Folr1;Fzd1;Fzd3;Fzd4;Fzd5;Fzd6…	20	Dvl2;Dvl3;Mark2;Lrp1;Lrp5;Notch1;Stk11;Hnf1a;Thra;Tle2;Tle3;Tsc2;Apc2;Pias4;Med12;Pygo2;Fuz;Bcl9l;Csnk1d;Gsk3a
GO:0019941	black	modification-dependent protein catabolic process	BP	0.0545455	495	3.07036	Gna12;Psen2;Psmd3;Rbck1;Sgta;Ubqln2;Fzr1;Ube4b;Rnf126;Usp19;Kctd17;Syvn1;Usp20;Xrcc3;Smurf1;Cul9;Ubqln4;Anapc2;Csnk1d;Mta1;Ube3b;Agap3;Bag6;Rnf40;Fbxl19;Pcyox1l;Gsk3a;Akt1;Apc;Birc2;Araf;Arntl;Ate1;Atm;Aup1;Axin1;Btrc;Bub1;Bub1b;Cbfa2t3;Cbl;Ccnf;Cd2ap;Cdkn2a;Clock;Clu;Plk3;Csnk2a1;Csnk2a2;Dab2;Ddb1;Ddit3;Usp17la;Dvl1;Egf;Ptk2;Fhit;Gba;Usp15;Gclc;Rack1;Trip12;Hdac6;Herc2;Hfe;Itch;Lnx1;Mad1l1;Smad7…	27	Gna12;Psen2;Psmd3;Rbck1;Sgta;Ubqln2;Fzr1;Ube4b;Rnf126;Usp19;Kctd17;Syvn1;Usp20;Xrcc3;Smurf1;Cul9;Ubqln4;Anapc2;Csnk1d;Mta1;Ube3b;Agap3;Bag6;Rnf40;Fbxl19;Pcyox1l;Gsk3a
GO:0061136	black	regulation of proteasomal protein catabolic process	BP	0.0718563	167	3.06334	Gna12;Prkaca;Psen2;Sgta;Ubqln2;Osbpl7;Usp19;Xrcc3;Ubqln4;Csnk1d;Bag6;Rnf40;Akt1;Apc;Araf;Atm;Axin1;Btrc;Bub1;Bub1b;Cbfa2t3;Clu;Plk3;Csnk2a1;Csnk2a2;Dab2;Dvl1;Rhbdf1;Fhit;Gba;Gclc;Rack1;Gpx1;Hfe;Mad1l1;Smad7;Mdm2;Mtm1;Commd1;Prkcg;Pkd1;Plk1;Psen1;Psme1;Psme2;Psme3;Pten;Rad23a;Rad23b;Rb1;Shh;Stil;Smarcc1;Plk2;Aurka;Terf1;Ubb;Sumo1;Usp5;Wnt10b;Xbp1;Zfp207;Arih1;Arih2;Tlk2;Rfwd2;Cul3;Zw10;Bcap31;Csnk…	12	Gna12;Prkaca;Psen2;Sgta;Ubqln2;Osbpl7;Usp19;Xrcc3;Ubqln4;Csnk1d;Bag6;Rnf40
GO:0044432	black	endoplasmic reticulum part	CC	0.0562061	427	3.0464	Atf6b;Ext2;Pigq;Furin;Rtn2;Creb3l1;Slc27a4;Cherp;Gabbr1;Pigo;Jph3;G6pc3;Sec31a;Osbpl7;Usp19;Sppl2b;Syvn1;Cant1;Pigt;Ubqln4;Ncln;Scap;Pigs;Pgap3;Ache;Adam10;Aldh3a2;Anxa7;Atp2a1;Atp2a2;Aup1;Bax;Bche;Bcl2;Hyou1;Pdia4;Calr;Calu;Canx;Capn2;Casq1;Casq2;Cav1;Cd4;Cftr;Cln3;Creb3;Pcyt1a;Cyba;Cyp2e1;Dad1;Dbi;Ddost;Dgat1;Dhcr7;Dmpk;Dnajc1;Dpagt1;Dpm1;Dpm2;Dst;Ebp;Eda;Edn1;Rhbdf1;Eif2ak3;Ext1;Faf1;Fkbp1a;Fk…	24	Atf6b;Ext2;Pigq;Furin;Rtn2;Creb3l1;Slc27a4;Cherp;Gabbr1;Pigo;Jph3;G6pc3;Sec31a;Osbpl7;Usp19;Sppl2b;Syvn1;Cant1;Pigt;Ubqln4;Ncln;Scap;Pigs;Pgap3
GO:0046902	black	regulation of mitochondrial membrane permeability	BP	0.108696	46	3.04589	Slc9a1;Zfp13;Naif1;Rhot2;Gsk3a;Slc25a4;Slc25a5;Atf2;Atpif1;Bad;Bak1;Bax;Bcl2;Bcl2l1;Bid;Bcl2l11;Bnip3;Bnip3l;Camk2a;Cnp;Eya2;Htt;Hk2;Ier3;Stat3;Trp53;Siva1;Acaa2;Sh3glb1;Hebp2;Mtch2;Gsk3b;Pmaip1;Rhot1;Moap1;Alkbh7;Mul1;Plekhf1;Bloc1s2;Slc35f6;Them4;Nol3;Mpv17l;Ppif;Bbc3;Tmem102	5	Slc9a1;Zfp13;Naif1;Rhot2;Gsk3a
GO:0048538	black	thymus development	BP	0.108696	46	3.04589	Psen2;Map2k2;Mapk3;Adrm1;Rltpr;Abl1;Apc;Bcl2;Bcl2l11;Cacnb4;Ctnnb1;Ccnb2;Crkl;Ephb3;Fadd;Gata3;Hand2;Hes1;Foxn1;Hoxa3;Jarid2;Mafb;Lmo4;Mad1l1;Cited2;Myb;Nfatc3;Pbx1;Prkdc;Psen1;Shh;Six4;Srf;Tbx1;Prdx2;Tgfbr1;Tyr;Ikzf1;Map2k1;Mapk1;Ripk3;Bcl11b;Ctc1;Braf;Raf1;Zbtb1	5	Psen2;Map2k2;Mapk3;Adrm1;Rltpr
GO:0000979	black	RNA polymerase II core promoter sequence-specific DNA binding	MF	0.0983607	61	3.0424	Maz;Hnf1a;Wbp2;Zfpm1;Cdk9;Zfp335;Runx2;Egr1;Ezh2;Fos;Gata1;Gata2;Gata3;Gata6;H3f3a;H3f3b;Hdac2;Hnf4a;Hoxb3;Hsf1;Hsf2;Smad1;Smad5;Mitf;Mtf1;Myc;Nfatc1;Nfil3;Nsd1;Nr4a2;Pax6;Pax8;Rbpj;Ruvbl2;Spi1;Sox11;Sox8;Sp1;Sp3;Stat1;Stat5a;Stat5b;Stat6;Tal1;Tbp;Tbr1;Tcf7l2;Trp53;Yap1;Ikzf1;H2afy;Kdm2b;H2afz;Suz12;Irf7;Heyl;Rreb1;Smyd3;Zfp277;Ep300;Nlrc5	6	Maz;Hnf1a;Wbp2;Zfpm1;Cdk9;Zfp335
GO:0001104	black	RNA polymerase II transcription cofactor activity	MF	0.0909091	77	3.0416	Ctbp1;Atn1;Wbp2;Med24;Med12;Med26;Mkl1;Cited1;Foxh1;Hdgf;Hipk2;Hyal2;Isl1;Mef2a;Cited2;Myt1l;Neurod1;Nfib;Pou1f1;Prrx1;Pou3f1;Med1;Ppargc1a;Uri1;Sin3a;Sin3b;Smarca4;Sox11;Sox12;Sox4;Med22;Tbx15;Tdg;Trim28;Tle1;Uxt;Med14;Trp53bp1;Med10;Tcerg1;Heyl;Cited4;Med20;Sall1;Med11;Med7;Smarca2;Med18;Med31;Med4;Rere;Med30;Med6;Med13l;Med8;Wwox;Med15;Zfp451;Psip1;Ankrd1;Med21;Ppargc1b;Med9;Myocd;Rbbp8;Pprc1;…	7	Ctbp1;Atn1;Wbp2;Med24;Med12;Med26;Mkl1
GO:0032868	black	response to insulin	BP	0.0714286	168	3.04044	Eif4ebp2;Inppl1;Pik3r2;Shc1;Slc9a1;Srebf1;Tsc2;Scly;Ncoa5;Wdtc1;Scap;Gsk3a;Aanat;Parp1;Ahsg;Akt1;Akt2;Cav2;Cdk2;Cish;Socs3;Socs1;Cited1;Cpeb1;Bcar1;Cry1;Cry2;Cyp27b1;Egr1;Egr2;Eif4ebp1;Ptprv;Fer;Foxc2;Lpin1;Ggh;Gpam;Gpld1;Grb10;Grb2;Hnrnpk;Igf1r;Igf2;Il1b;Ins2;Insr;Irs1;Irs3;Irs4;Khk;Kl;Mc4r;Rab8a;Mstn;Myo5a;Ngfr;Pak1;Kat2b;Pck1;Pdk2;Enpp1;Pdpk1;Pik3r1;Pik3r3;Prkca;Prkcb;Prkcd;Prkci;Prkcq;Prkcz;P…	12	Eif4ebp2;Inppl1;Pik3r2;Shc1;Slc9a1;Srebf1;Tsc2;Scly;Ncoa5;Wdtc1;Scap;Gsk3a
GO:0005789	black	endoplasmic reticulum membrane	CC	0.0593472	337	3.03519	Atf6b;Ext2;Furin;Creb3l1;Slc27a4;Cherp;Gabbr1;Pigo;Jph3;G6pc3;Usp19;Sppl2b;Syvn1;Cant1;Pigt;Ubqln4;Ncln;Scap;Pigs;Pgap3;Aldh3a2;Anxa7;Atp2a1;Atp2a2;Aup1;Bax;Bcl2;Calr;Canx;Cav1;Cd4;Cftr;Cln3;Creb3;Pcyt1a;Cyp2e1;Dad1;Ddost;Dgat1;Dhcr7;Dmpk;Dpagt1;Dpm1;Dpm2;Dst;Ebp;Eda;Rhbdf1;Eif2ak3;Ext1;Faf1;Fkbp1a;Fkbp1b;Fkbp2;Fkbp4;Fkbp5;Fkbp10;Fkbp7;Fkbp8;G6pc2;Slc37a4;Bscl2;Gnrh1;Gpaa1;Pdia3;Hspa5;H13;Hmgcr;H…	20	Atf6b;Ext2;Furin;Creb3l1;Slc27a4;Cherp;Gabbr1;Pigo;Jph3;G6pc3;Usp19;Sppl2b;Syvn1;Cant1;Pigt;Ubqln4;Ncln;Scap;Pigs;Pgap3
GO:0019903	black	protein phosphatase binding	MF	0.0769231	130	3.03448	Cacna1c;Csk;Kat2a;Pik3r2;Shc1;Slc9a1;Traf3;Hsf4;Strn4;Ppp2r4;Akap1;Akt1;Ap3b1;Bad;Bcl2;Cacna1b;Ctnnb1;Ctnnd1;Cdh1;Cdh2;Cdh5;Cdkn1b;Cpd;Csf1r;Vcan;Dlg4;Drd1;Egfr;Eif2ak3;Eif4ebp1;Erbb2;Fer;Flt4;Ghr;Rack1;Grb2;Hmgcr;Hsp90aa1;Insr;Itpr1;Jak1;Jak3;Jup;Kcnn4;Kcnq1;Lck;Lmna;Met;Mapt;Ppp1r15a;Nek2;Igbp1;Pik3r1;Pparg;Ppp1ca;Ppp1cc;Ppp2ca;Ppp3cb;Pstpip1;Ptpn1;Reg1;Ros1;Rpa2;Sod1;Sphk1;Stat1;Stat3;Stat5a;S…	10	Cacna1c;Csk;Kat2a;Pik3r2;Shc1;Slc9a1;Traf3;Hsf4;Strn4;Ppp2r4
GO:0007611	black	learning or memory	BP	0.0669856	209	3.02237	Adnp;Cacna1c;Cux2;Eif4ebp2;Psen2;Thra;Slc12a5;Jph3;Shank3;Mapk8ip2;Hrh3;Ehmt2;Slc8a2;Crtc1;Abl2;Asic1;Chrna7;Chrnb2;Adcy8;Adra1b;Adrb1;Adrb2;Apbb1;App;Arf4;Atp8a1;Bche;Bdnf;Btg2;Cacna1e;Calb1;Camk4;Casp1;Casp3;Cdk5;Chat;Cln3;Cnr1;Comt;Creb1;Crhr1;Cx3cr1;Cyp7b1;Dbi;Drd1;Drd2;Drd3;Egfr;Egr1;Ephb2;Epm2a;Fen1;Fgf13;Aff2;Fzd9;Glp1r;Gm2a;Grin1;Grin2a;Grin2b;Grpr;Htt;Hif1a;Hmgcr;Hrh1;Hrh2;Htr2a;Htr7;Slc…	14	Adnp;Cacna1c;Cux2;Eif4ebp2;Psen2;Thra;Slc12a5;Jph3;Shank3;Mapk8ip2;Hrh3;Ehmt2;Slc8a2;Crtc1
GO:0035601	black	protein deacylation	BP	0.0897436	78	3.00184	Ctbp1;Ncor2;Srebf1;Lypla2;Sirt6;Tada3;Prkd2;Bcl6;Dyrk1a;Elk4;Smarcad1;Lpin1;Fnta;Hdac2;Hdac3;Hdac5;Hdac6;Ndst1;Msl3;Per1;Phb;Prkd1;Lypla1;Pml;Ppt1;Rest;Ncor1;Foxp3;Sin3a;Sin3b;Tbl1x;Tcf21;Morf4l1;Tgfb1;Trp53;Vegfa;Nek3;Mapk8;Brms1l;Rbm14;Morf4l2;Ripk3;Sirt2;Sirt3;Nacc2;Sirt5;Pink1;Znhit1;Hdac8;Prdm5;Nipbl;Sfpq;Suds3;Msl3l2;Hopx;Sirt4;Hdac9;BC004004;Tbl1xr1;Jdp2;Trps1;Sirt1;Brms1;Spred1;Spred2;Baz…	7	Ctbp1;Ncor2;Srebf1;Lypla2;Sirt6;Tada3;Prkd2
GO:1903311	black	regulation of mRNA metabolic process	BP	0.079646	113	2.99531	Hnrnpl;Srsf4;Dazap1;Dhx34;Celf3;Cdk9;Srsf9;Safb;Rnf40;Apobec1;Zfp36l2;Btg2;C1qbp;Ccnt1;Cdk11b;Ddx5;Dyrk1a;Srsf10;Gtpbp1;Hnrnpc;Hnrnpk;Hspa8;Uhmk1;Magoh;Npm1;Pabpc1;Papola;Cnot7;Ptbp1;Rbm4;Rbmx;Rbmxl1;Upf1;Rnps1;Sap18;Srsf2;Tra2b;Snrnp70;Srpk1;Supt5;Supt6;Tia1;Tob1;Ctr9;U2af2;Zfp36;Zfp64;Nelfe;Prpf19;Rbfox3;Hnrnpa2b1;Paf1;Acin1;Mbnl1;Pcbp4;Rbm8a;Wtap;Snw1;Rbm25;Bag4;Polr2g;Srsf6;Rbm42;Ncbp2;Ptcd2;…	9	Hnrnpl;Srsf4;Dazap1;Dhx34;Celf3;Cdk9;Srsf9;Safb;Rnf40
GO:0051098	black	regulation of binding	BP	0.0620438	274	2.99137	Adnp;Kat2a;Hnrnpl;Psen2;Rara;Zfpm1;Mapk3;Pex14;Brd4;Pygo2;Med25;Golga2;Mapre3;Cdk9;Rap1gap;Wfikkn1;Acd;Abl1;Abl2;Ace;Adam15;Add1;Add2;Parp1;Adrb2;Ager;Angpt1;Agrn;Aplp2;App;B2m;Bak1;Bax;Bcl2;Blm;Bmp2;Bmp4;Anxa2;Calm1;Ctnnb1;Cav1;Runx1t1;Cdc42;Cdk5;Cdkn2a;Ckmt1;Csf3;Ctbp2;Dab2;Pcbd1;Ddit3;Dvl1;E2f1;Mapre1;Ebf2;Egf;Eif2ak3;Eno1;Epha4;Ephb6;Ercc2;Fkbp1a;Flot1;Aktip;Gata1;Gata3;Gcg;Aes;Hand2;Hdac2;Hd…	17	Adnp;Kat2a;Hnrnpl;Psen2;Rara;Zfpm1;Mapk3;Pex14;Brd4;Pygo2;Med25;Golga2;Mapre3;Cdk9;Rap1gap;Wfikkn1;Acd
GO:0002011	black	morphogenesis of an epithelial sheet	BP	0.106383	47	2.98728	Ddr1;Dvl2;Notch1;Rltpr;Megf8;Acvrl1;Chuk;Col5a1;Dag1;Dvl1;Hbegf;Hoxb4;Cyr61;Jag1;Ajuba;Lama1;Lrp6;Mmp12;Notch2;Scnn1b;Scnn1g;Snai2;Sos1;Sox11;Srf;Lin7c;Wnt5a;Map3k1;Tor1a;Dll4;Mpp5;Tmeff2;Pdcd10;Rreb1;Flrt3;Arhgap12;Clasp2;Plet1;Clasp1;Pard3;Vangl2;Phactr4;Hoxb2;Phldb2;Gsn;Arhgap24;Zfp568	5	Ddr1;Dvl2;Notch1;Rltpr;Megf8
GO:0051962	black	positive regulation of nervous system development	BP	0.0541667	480	2.97353	Adnp;Cux2;Mark2;Hap1;Limk1;Nkx2-2;Nkx6-1;Notch1;Numbl;Rara;Stk11;Tcf3;Map2k2;Mapk8ip3;Shank3;Clstn1;Smurf1;Anapc2;Golga2;Plxnb2;Ppp2r5b;Zmynd8;Plxnb1;Megf8;Zfp335;Crtc1;Abl2;Asic2;Ace;Ache;Aspa;Adamts1;Adcyap1;Avil;Agrn;Apbb1;Apoe;Arf1;Rhoa;Rnd2;Arsb;Atf1;Neurog2;Neurog3;Bcl2;Bcl6;Bdnf;Bmp2;Bmp4;Bmp5;Bmp6;Bmp7;Bmpr2;Bnip2;Tspo;Aspm;Camk2b;Ctnnb1;Cbfa2t2;Cbln1;Cbln2;Cd24a;Cdh4;Cxcr4;Ccr2;Ccr5;Cnr1…	26	Adnp;Cux2;Mark2;Hap1;Limk1;Nkx2-2;Nkx6-1;Notch1;Numbl;Rara;Stk11;Tcf3;Map2k2;Mapk8ip3;Shank3;Clstn1;Smurf1;Anapc2;Golga2;Plxnb2;Ppp2r5b;Zmynd8;Plxnb1;Megf8;Zfp335;Crtc1
GO:0050684	black	regulation of mRNA processing	BP	0.0833333	96	2.96852	Hnrnpl;Srsf4;Dazap1;Celf3;Cdk9;Srsf9;Safb;Rnf40;Btg2;C1qbp;Ccnt1;Cdk11b;Ddx5;Dyrk1a;Srsf10;Hnrnpk;Hspa8;Uhmk1;Magoh;Npm1;Pabpc1;Papola;Cnot7;Ptbp1;Rbm4;Rbmx;Rbmxl1;Rnps1;Sap18;Srsf2;Tra2b;Snrnp70;Srpk1;Supt5;Supt6;Tia1;Tob1;Ctr9;U2af2;Zfp36;Zfp64;Nelfe;Prpf19;Rbfox3;Hnrnpa2b1;Paf1;Acin1;Mbnl1;Pcbp4;Rbm8a;Wtap;Snw1;Rbm25;Polr2g;Srsf6;Rbm42;Ncbp2;Ptcd2;Srrm4;Lmntd2;Slc39a5;Malat1;Rnf219;Iws1;Zc3h14…	8	Hnrnpl;Srsf4;Dazap1;Celf3;Cdk9;Srsf9;Safb;Rnf40
GO:0098732	black	macromolecule deacylation	BP	0.0886076	79	2.9627	Ctbp1;Ncor2;Srebf1;Lypla2;Sirt6;Tada3;Prkd2;Bcl6;Dyrk1a;Elk4;Smarcad1;Lpin1;Fnta;Hdac2;Hdac3;Hdac5;Hdac6;Ndst1;Msl3;Per1;Phb;Prkd1;Lypla1;Pml;Ppt1;Rest;Ncor1;Foxp3;Sin3a;Sin3b;Tbl1x;Tcf21;Morf4l1;Tgfb1;Trp53;Vegfa;Nek3;Mapk8;Brms1l;Ppt2;Rbm14;Morf4l2;Ripk3;Sirt2;Sirt3;Nacc2;Sirt5;Pink1;Znhit1;Hdac8;Prdm5;Nipbl;Sfpq;Suds3;Msl3l2;Hopx;Sirt4;Hdac9;BC004004;Tbl1xr1;Jdp2;Trps1;Sirt1;Brms1;Spred1;Spred…	7	Ctbp1;Ncor2;Srebf1;Lypla2;Sirt6;Tada3;Prkd2
GO:0005774	black	vacuolar membrane	CC	0.0677083	192	2.9535	Abca2;Ap3d1;Atp6v0d1;Gaa;Gnb2;Lrp1;Atp6v0a2;Sphk2;Sppl2b;Mfsd12;Pqlc2;Daglb;Pcyox1l;Ankfy1;Anxa6;Ap3b1;Atp6v1a;Atp6v1b2;Atp6v1e1;Atp6v0a1;Atp6v0c;Anxa2;Scarb2;Cd63;Clcn5;Cln3;Col6a1;Cp;Dnajc5;Dpp4;Egf;Enpep;Flot1;Gba;Gdap2;Gfap;Gna11;Gnai1;Gnai3;Gnaq;Gnb1;Gnb4;Lrp2;Gpld1;H2-Eb1;H2-DMa;H2-DMb2;Hspa8;Hsp90ab1;Lamp1;Lamp2;Anpep;Laptm5;Mylpf;Myo7a;Napb;Npc1;Slc11a2;Nsf;Gpr143;P2rx4;Enpp1;Pld1;Ctsa;Ps…	13	Abca2;Ap3d1;Atp6v0d1;Gaa;Gnb2;Lrp1;Atp6v0a2;Sphk2;Sppl2b;Mfsd12;Pqlc2;Daglb;Pcyox1l
GO:0007507	black	heart development	BP	0.0539419	482	2.95101	Dnm2;Dvl2;Dvl3;Gaa;Kat2a;Hspg2;Lrp1;Nprl3;Notch1;Pcnt;Rara;Shc1;Slc9a1;Ncor2;Tsc2;Vegfb;Zfpm1;Map2k2;Mapk3;Sirt6;Ddx39b;Med12;Ube4b;Fuz;Megf8;Gsk3a;Acadm;Ace;Actc1;Actn2;Acvr1;Acvr2b;Adam15;Adam19;Adamts1;Adm;Adra1b;Adra1a;Adrb1;Acan;Angpt1;Agt;Agtr1a;Ahr;Slc25a4;Ap1b1;Speg;Atg5;Atf2;Atm;Axin2;Prdm1;Bmp2;Bmp4;Bmpr1a;Smyd1;Zfp36l1;Cacybp;Casp3;Casp7;Casp8;Ctnnb1;Rb1cc1;Cdk1;Cdc42;Cxcr4;Col11a1;Col…	26	Dnm2;Dvl2;Dvl3;Gaa;Kat2a;Hspg2;Lrp1;Nprl3;Notch1;Pcnt;Rara;Shc1;Slc9a1;Ncor2;Tsc2;Vegfb;Zfpm1;Map2k2;Mapk3;Sirt6;Ddx39b;Med12;Ube4b;Fuz;Megf8;Gsk3a
GO:0001701	black	in utero embryonic development	BP	0.0565553	389	2.94457	Epn1;Kat2a;Gna12;Mbd3;Notch1;Pcnt;Ncor2;Hnf1a;Mapk8ip3;Brd4;Ints1;Pygo2;Syvn1;Sp2;Slc39a3;Mfn2;Llgl2;Wdtc1;Cnot3;Zfp335;Kmt2d;Tctn1;Acvr1;Acvr1b;Acvrl1;Ada;Adam10;Add1;Adm;Angpt1;Akt1;Amd1;Apba2;Speg;Nr2f2;Ar;Arnt;Atp1b1;Axin1;Bcl2l1;Bcl2l11;Prdm1;Bmi1;Bmp2;Bmpr1a;Bnip2;Brca2;Zfp36l1;Birc6;C6;Capn2;Ctnnb1;Runx1;Ccnb2;Ccnk;Cdk11b;Cdh1;Cdkn1c;Cdx2;Cdx4;Cebpa;Cebpb;Socs3;Cited1;Coq7;Dmbt1;Cr1l;Csf2;…	22	Epn1;Kat2a;Gna12;Mbd3;Notch1;Pcnt;Ncor2;Hnf1a;Mapk8ip3;Brd4;Ints1;Pygo2;Syvn1;Sp2;Slc39a3;Mfn2;Llgl2;Wdtc1;Cnot3;Zfp335;Kmt2d;Tctn1
GO:0006497	black	protein lipidation	BP	0.0875	80	2.92418	Pigq;Pigo;Zdhhc1;Pigt;Zdhhc9;Pigs;Pgap3;Abca1;Alox12b;Atg5;Dpm1;Dpm2;Gpaa1;Mttp;Nmt1;Nmt2;Piga;Pigf;Ppm1a;Ppm1b;Pign;Zdhhc8;Wipi1;Porcn;Wdr45;Pigb;Pigp;Golga7;Zdhhc12;Alg5;Pigyl;Pyurf;Atg4b;Atg10;Wdr45b;Zdhhc6;Pigc;Atg12;Pigm;Zdhhc21;Dpm3;Zdhhc3;Pigw;Zdhhc2;Pigx;Zdhhc16;Atg7;Hhatl;Wipi2;Svip;Zdhhc20;Clip3;Selk;Rab3gap2;Zdhhc7;Zdhhc15;Pigh;Map6d1;Zdhhc14;Mppe1;Rab3gap1;Hhat;Zdhhc5;Pigu;Pigv;Pgap2;…	7	Pigq;Pigo;Zdhhc1;Pigt;Zdhhc9;Pigs;Pgap3
GO:0006664	black	glycolipid metabolic process	BP	0.0875	80	2.92418	Pigq;St3gal3;Pigo;Pigt;Pigs;Pgap3;Gal3st3;Gla;Bax;Cln3;Crem;Dpm1;Dpm2;Galc;B4galnt1;Gba;Gm2a;Gpaa1;Gpld1;Hexa;Hexb;Kit;Map7;Naga;Neu1;Piga;Pigf;Prkcd;Pnliprp2;Psap;St3gal1;St3gal4;St3gal2;St6galnac2;St6galnac3;St6galnac4;St8sia2;St8sia3;St8sia4;St3gal5;Ugcg;Ugt8a;Neu2;St6galnac5;Pign;Neu3;St6galnac6;Gal3st1;St3gal6;Pigb;Pigp;Alg5;Pigyl;Pyurf;Pigc;Pigm;Kdelc2;Dpm3;Pigw;Kdelc1;Pigx;Cln6;Pigh;Aldh5a…	7	Pigq;St3gal3;Pigo;Pigt;Pigs;Pgap3;Gal3st3
GO:0006511	black	ubiquitin-dependent protein catabolic process	BP	0.0533881	487	2.89516	Gna12;Psen2;Psmd3;Rbck1;Sgta;Ubqln2;Fzr1;Ube4b;Rnf126;Usp19;Kctd17;Syvn1;Usp20;Xrcc3;Smurf1;Cul9;Ubqln4;Anapc2;Csnk1d;Mta1;Ube3b;Agap3;Bag6;Rnf40;Fbxl19;Gsk3a;Akt1;Apc;Birc2;Araf;Arntl;Ate1;Atm;Aup1;Axin1;Btrc;Bub1;Bub1b;Cbfa2t3;Cbl;Ccnf;Cd2ap;Cdkn2a;Clock;Clu;Plk3;Csnk2a1;Csnk2a2;Dab2;Ddb1;Ddit3;Usp17la;Dvl1;Egf;Ptk2;Fhit;Gba;Usp15;Gclc;Rack1;Trip12;Hdac6;Herc2;Hfe;Itch;Lnx1;Mad1l1;Smad7;Mdm2;Ps…	26	Gna12;Psen2;Psmd3;Rbck1;Sgta;Ubqln2;Fzr1;Ube4b;Rnf126;Usp19;Kctd17;Syvn1;Usp20;Xrcc3;Smurf1;Cul9;Ubqln4;Anapc2;Csnk1d;Mta1;Ube3b;Agap3;Bag6;Rnf40;Fbxl19;Gsk3a
GO:0044437	black	vacuolar part	CC	0.0666667	195	2.89232	Abca2;Ap3d1;Atp6v0d1;Gaa;Gnb2;Lrp1;Atp6v0a2;Sphk2;Sppl2b;Mfsd12;Pqlc2;Daglb;Pcyox1l;Acr;Ankfy1;Anxa6;Ap3b1;Atp6v1a;Atp6v1b2;Atp6v1e1;Atp6v0a1;Atp6v0c;Anxa2;Scarb2;Cd63;Clcn5;Cln3;Col6a1;Cp;Dnajc5;Dld;Dpp4;Egf;Enpep;Flot1;Gba;Gdap2;Gfap;Gna11;Gnai1;Gnai3;Gnaq;Gnb1;Gnb4;Lrp2;Gpld1;H2-Eb1;H2-DMa;H2-DMb2;Hspa8;Hsp90ab1;Lamp1;Lamp2;Anpep;Laptm5;Mylpf;Myo7a;Napb;Npc1;Slc11a2;Nsf;Gpr143;P2rx4;Enpp1;Pld1…	13	Abca2;Ap3d1;Atp6v0d1;Gaa;Gnb2;Lrp1;Atp6v0a2;Sphk2;Sppl2b;Mfsd12;Pqlc2;Daglb;Pcyox1l
GO:1903509	black	liposaccharide metabolic process	BP	0.0864198	81	2.88624	Pigq;St3gal3;Pigo;Pigt;Pigs;Pgap3;Gal3st3;Gla;Bax;Cln3;Crem;Dpm1;Dpm2;Galc;B4galnt1;Gba;Gm2a;Gpaa1;Gpld1;Hexa;Hexb;Kit;Map7;Naga;Neu1;Piga;Pigf;Prkcd;Pnliprp2;Psap;St3gal1;St3gal4;St3gal2;St6galnac2;St6galnac3;St6galnac4;St8sia2;St8sia3;St8sia4;St3gal5;Ugcg;Ugt8a;Neu2;St6galnac5;Aoah;Pign;Neu3;St6galnac6;Gal3st1;St3gal6;Pigb;Pigp;Alg5;Pigyl;Pyurf;Pigc;Pigm;Kdelc2;Dpm3;Pigw;Kdelc1;Pigx;Cln6;Pigh;A…	7	Pigq;St3gal3;Pigo;Pigt;Pigs;Pgap3;Gal3st3
GO:0010469	black	regulation of receptor activity	BP	0.0808081	99	2.86939	Hap1;Psen2;Mink1;Jph3;Shank3;Mapk8ip2;Med16;Ppp2r5b;Chrna4;Adam17;Adora1;Adra2a;Ager;Aplp2;App;Arc;Bicd1;Cacng2;Anxa2;Casq2;Cav1;Cftr;Cnih2;Crhbp;Dlg4;Dmd;Egf;Stom;Ereg;Foxh1;Fkbp1a;Fkbp1b;Gsto1;Hdac6;Htt;Hfe;Hrc;Mef2c;Myo5a;Neurl1a;Oprm1;P2ry1;Pkd2;Serpine1;Plau;Pln;Med1;Ppargc1a;Ppp2ca;Psen1;Ptk2b;Ptprj;Rasgrf1;Rasgrf2;Reln;Rxrb;Tgfa;Ube2i;Grem1;Fbxw7;Cacng3;Cacng4;Heyl;Kcnj1;Socs5;Park7;Jph2;A…	8	Hap1;Psen2;Mink1;Jph3;Shank3;Mapk8ip2;Med16;Ppp2r5b
GO:0071375	black	cellular response to peptide hormone stimulus	BP	0.0681818	176	2.86286	Csk;Eif4ebp2;Inppl1;Pik3r2;Shc1;Slc9a1;Srebf1;Tsc2;Adrm1;Ncoa5;Wdtc1;Gsk3a;Adcy6;Parp1;Ahsg;Akt1;Akt2;Anxa5;Ctnnb1;Cav1;Cav2;Cdk2;Cish;Socs3;Socs1;Cpeb1;Crhbp;Crhr1;Bcar1;Eif4ebp1;Ptprv;Ptk2;Fer;Foxc2;Lpin1;Gcgr;Ghr;Gpam;Gpld1;Grb10;Grb2;Nr4a1;Hnrnpk;Hsf1;Igf1;Igf1r;Igf2;Il18;Il1b;Ins2;Insr;Irf1;Irs1;Irs3;Irs4;Jak2;Kl;Rab8a;Mstn;Myo5a;Nfkb1;Ngfr;Nr4a3;Nr4a2;Pak1;Kat2b;Pdk2;Enpp1;Pdpk1;Pik3r1;Pik3…	12	Csk;Eif4ebp2;Inppl1;Pik3r2;Shc1;Slc9a1;Srebf1;Tsc2;Adrm1;Ncoa5;Wdtc1;Gsk3a
GO:0050852	black	T cell receptor signaling pathway	BP	0.0923077	65	2.85877	Cacnb3;Psen2;Stk11;Rbck1;Prkd2;Rltpr;Ada;Bcl10;Bcl2a1d;Cacnb4;Cd28;Cd3e;Cd247;Ccr7;Elf1;Fyn;Gata3;Ptpn6;Hras;Itk;Kcnn4;Lck;Lcp2;Lgals3;Nras;Pde4b;Plcg1;Prnp;Psen1;Ptpn2;Ptpn22;Ptprc;Ptprj;Foxp3;Thy1;Traf6;Txk;Ezr;Zap70;Mapk1;Cacna1f;Stoml2;Dusp3;Lime1;Sppl3;Phpt1;Rftn1;Skap1;Clec2i;Ube2n;Tnfrsf21;Dusp22;Pawr;Ripk2;Cblb;Cd300a;Shb;Themis2;Plcg2;Btn2a2;Malt1;Rnf31;Ubash3a;Dennd1b;Rc3h1	6	Cacnb3;Psen2;Stk11;Rbck1;Prkd2;Rltpr
GO:0060976	black	coronary vasculature development	BP	0.0923077	65	2.85877	Dnm2;Lrp1;Notch1;Vegfb;Fuz;Megf8;Ace;Angpt1;Prdm1;Ctnnb1;Epor;Fgf1;Fgf2;Fgf9;Fgfr1;Fgfr2;Gata4;Gata6;Lrp2;Gpc3;Hand2;Hey2;Ndst1;Kif7;Smad6;Mesp1;Nrp1;Pcsk5;Pdgfb;Pdgfrb;Robo1;Rxra;Shh;Smarca4;Srf;Tbx1;Tgfbr3;Vegfa;Wt1;Zbtb14;Zfpm2;Sufu;Cntrl;Prok2;Prokr1;Dctn5;Tab1;Pbrm1;Plxnd1;Ptk7;Ap2b1;2410089E03Rik;Gper1;Myh10;Vangl2;Sec24b;Prickle1;Adamts6;Dync2h1;Pde2a;Myocd;Mmp21;Setd2;Snx17;Ltbp1	6	Dnm2;Lrp1;Notch1;Vegfb;Fuz;Megf8
GO:0008654	black	phospholipid biosynthetic process	BP	0.0729927	137	2.84919	Pigq;Inppl1;Pcx;Agpat1;Sphk2;Pigo;Pigt;Lpcat4;Pigs;Pgap3;Apoa1;Apoa2;Atm;Chkb;Chka;Pcyt1a;Dpm1;Dpm2;Fabp3;Fgf2;Fgf7;Gpaa1;Gpam;Lpcat3;Hexb;Htr2a;Htr2b;Idh1;Ajuba;Fabp5;Lcat;Mvk;Pdgfa;Pdgfb;Pemt;Piga;Pigf;Pik3ca;Pik3r1;Pip5k1c;Pip5k1b;Pip5k1a;Pla2g5;Pld1;Pld2;Ppard;Ptdss1;Sptlc2;Plscr1;Sh3yl1;Slc27a1;Ptdss2;Pign;Ept1;Agpat3;Pik3cg;Agpat5;Cdipt;Pla2g6;Sh3glb1;Impa1;Pigb;Pigp;Serinc1;Alg5;Pigyl;Pyur…	10	Pigq;Inppl1;Pcx;Agpat1;Sphk2;Pigo;Pigt;Lpcat4;Pigs;Pgap3
GO:0030117	black	membrane coat	CC	0.0853659	82	2.84888	Ap2a1;Ap3d1;Sec31a;Scyl1;Gga1;Ap5z1;Gga3;Ap1b1;Ap1g1;Ap1g2;Ap1m1;Ap1m2;Ap1s1;Ap2a2;Ap2m1;Ap3b1;Ap3b2;Ap3s1;Ap3s2;Ap4m1;Clta;Copa;Dab2;Dnm1;Epn2;Eps15;Eps15l1;Igf2r;Lrrn3;Sec23a;Snap91;Trf;Sec23b;Copb2;Copg2;Copg1;Ap3m1;Copz2;Copz1;Cope;Ap3m2;Tmed3;Necap2;Sclt1;Cltc;Necap1;1190002N15Rik;Chmp2a;Ap5s1;Copb1;Vps11;Ap2b1;Tbc1d5;Sgip1;Gga2;Cltb;Ap5m1;Chmp4b;Pank1;Sec24a;Vps33a;Vps16;Sec24b;Ldlrap1;Synj…	7	Ap2a1;Ap3d1;Sec31a;Scyl1;Gga1;Ap5z1;Gga3
GO:0048475	black	coated membrane	CC	0.0853659	82	2.84888	Ap2a1;Ap3d1;Sec31a;Scyl1;Gga1;Ap5z1;Gga3;Ap1b1;Ap1g1;Ap1g2;Ap1m1;Ap1m2;Ap1s1;Ap2a2;Ap2m1;Ap3b1;Ap3b2;Ap3s1;Ap3s2;Ap4m1;Clta;Copa;Dab2;Dnm1;Epn2;Eps15;Eps15l1;Igf2r;Lrrn3;Sec23a;Snap91;Trf;Sec23b;Copb2;Copg2;Copg1;Ap3m1;Copz2;Copz1;Cope;Ap3m2;Tmed3;Necap2;Sclt1;Cltc;Necap1;1190002N15Rik;Chmp2a;Ap5s1;Copb1;Vps11;Ap2b1;Tbc1d5;Sgip1;Gga2;Cltb;Ap5m1;Chmp4b;Pank1;Sec24a;Vps33a;Vps16;Sec24b;Ldlrap1;Synj…	7	Ap2a1;Ap3d1;Sec31a;Scyl1;Gga1;Ap5z1;Gga3
GO:0001047	black	core promoter binding	MF	0.0700637	157	2.83911	Zfhx3;Maz;Notch1;Taf1c;Hnf1a;Wbp2;Zfpm1;Cdk9;Mta1;Safb;Zfp335;Arntl;Atf4;Neurog3;Runx2;Runx1;Clock;Crem;Cry1;Gadd45a;E2f1;E2f3;Egr1;Elk1;Esr1;Ezh2;Fos;Gata1;Gata2;Gata3;Gata6;H3f3a;H3f3b;Hdac2;Hdac5;Hdac6;Hnf4a;Hoxb3;Hsf1;Hsf2;Ifi203;Ifi204;Irf9;Klf4;Smad1;Smad5;Mef2c;Meox1;Mitf;Mtf1;Myc;Nfatc1;Nfil3;Nfya;Nr4a3;Nsd1;Nr4a2;Mybbp1a;Pax6;Pax8;Pdx1;Med1;Pparg;Prox1;Rb1;Rbmx;Rbmxl1;Rbpj;Relb;Rest;Rora…	11	Zfhx3;Maz;Notch1;Taf1c;Hnf1a;Wbp2;Zfpm1;Cdk9;Mta1;Safb;Zfp335
GO:0030695	black	GTPase regulator activity	MF	0.0625	240	2.83787	Arhgef1;Nprl3;Sipa1;Tsc2;Arhgap23;Tbc1d13;Sipa1l3;Tbc1d9b;Sgsm3;Rap1gap;Agap3;Git1;Llgl2;Arhgap33;Tbc1d2;Arhgap5;Arhgap6;Arhgdib;Axin1;Axin2;Arhgap31;Chm;Chml;Asap1;Ect2;Evi5;Srgap2;Gdi1;Gdi2;Arhgdig;Gnaq;Gnb5;Rhpn1;Agfg1;Htr2b;Itgb1bp1;Jun;Llgl1;Myo9b;Nf1;Pcp2;Pde6d;Plcb1;Ranbp1;Rangap1;Rasa3;Rasal1;Ralgds;Rgs16;Rgs2;Rgs4;Rgs5;Rgs9;Ralbp1;Rp2;Rtkn;Slit2;Thy1;Wnt11;Tiam2;Rgs7;Git2;Racgap1;Rabgap1…	15	Arhgef1;Nprl3;Sipa1;Tsc2;Arhgap23;Tbc1d13;Sipa1l3;Tbc1d9b;Sgsm3;Rap1gap;Agap3;Git1;Llgl2;Arhgap33;Tbc1d2
GO:0044431	black	Golgi apparatus part	CC	0.0552764	398	2.83026	Ap3d1;Bsn;Dnm2;Ext2;Cog1;Furin;St3gal3;Scamp2;Cabp1;Mapk8ip3;Sppl2b;Trappc9;Scyl1;Golga2;Man2a2;Zdhhc9;March9;Hid1;Fam109a;Scap;Gga3;Myo18a;Acr;Adam10;Agrp;Ap1b1;Ap1g1;Ap1g2;Ap1m1;Ap1m2;Ap1s1;Ap3b1;Ap3b2;Ap3s1;Ap3s2;Ap4m1;Ap4s1;Arf1;Atp7a;Atp7b;Atp8a1;Atp9a;Bet1;Bicd1;Birc6;Car4;Cav1;Cdc42;Cdh1;Cit;Cln3;Clta;Plk3;Copa;Cpd;Creb3;Crhr1;Cux1;Cyp2e1;Rhbdf1;Lgr5;Fnbp1;B4galnt1;Gcnt1;Ggta1;B4galt1;Gnas…	22	Ap3d1;Bsn;Dnm2;Ext2;Cog1;Furin;St3gal3;Scamp2;Cabp1;Mapk8ip3;Sppl2b;Trappc9;Scyl1;Golga2;Man2a2;Zdhhc9;March9;Hid1;Fam109a;Scap;Gga3;Myo18a
GO:0042175	black	nuclear outer membrane-endoplasmic reticulum membrane network	CC	0.0564972	354	2.79966	Atf6b;Ext2;Furin;Creb3l1;Slc27a4;Cherp;Gabbr1;Pigo;Jph3;G6pc3;Usp19;Sppl2b;Syvn1;Cant1;Pigt;Ubqln4;Ncln;Scap;Pigs;Pgap3;Aldh3a2;Anxa7;Atp2a1;Atp2a2;Aup1;Bax;Bcl2;Calr;Canx;Cav1;Cd4;Cftr;Cln3;Creb3;Pcyt1a;Cyp2e1;Dad1;Ddost;Dgat1;Dhcr7;Dmpk;Dpagt1;Dpm1;Dpm2;Dst;Ebp;Eda;Rhbdf1;Eif2ak3;Emd;Ext1;Faf1;Fkbp1a;Fkbp1b;Fkbp2;Fkbp4;Fkbp5;Fkbp10;Fkbp7;Fkbp8;G6pc2;Slc37a4;Bscl2;Gnrh1;Gpaa1;Pdia3;Hspa5;H13;Hmg…	20	Atf6b;Ext2;Furin;Creb3l1;Slc27a4;Cherp;Gabbr1;Pigo;Jph3;G6pc3;Usp19;Sppl2b;Syvn1;Cant1;Pigt;Ubqln4;Ncln;Scap;Pigs;Pgap3
GO:0009896	black	positive regulation of catabolic process	BP	0.0582524	309	2.79185	Psen2;Stk11;Tsc2;Apc2;Mapk3;Sgta;Ubqln2;Fzr1;Pnpla2;Osbpl7;Smurf1;Trim8;Csnk1d;Sgsm3;Gga1;Bag6;Rnf40;Gga3;Actn3;Adam8;Adam9;Adra1b;Adra2a;Adrb2;Ager;Akt1;Akt2;Apc;Atg5;Apoa1;Apoa2;Apoe;Apoh;Atpif1;Axin1;Bax;Bnip3;Bnip3l;Zfp36l2;Btg2;Cbfa2t3;Entpd5;Cd81;Clu;Plk3;Cpt1a;Csnk2a1;Ctsc;Dab2;Dcn;Dvl1;Egf;Endog;Epm2a;Ptk2;Gapdhs;Gba;Gpd1;Gja1;Gclc;Rack1;Gpc3;Gpld1;Gtpbp1;Hif1a;Hmgb1;Hmox1;Hsf1;Htr2a;Ier3…	18	Psen2;Stk11;Tsc2;Apc2;Mapk3;Sgta;Ubqln2;Fzr1;Pnpla2;Osbpl7;Smurf1;Trim8;Csnk1d;Sgsm3;Gga1;Bag6;Rnf40;Gga3
GO:0060562	black	epithelial tube morphogenesis	BP	0.0582524	309	2.79185	Ddr1;Dvl2;Dvl3;Kat2a;Lrp5;Notch1;Notch4;Prkaca;Rara;Rarg;Tsc2;Shank3;Med12;Fuz;Scrib;Plxnb2;Megf8;Tctn1;Acvr1;Acvrl1;Adm;Angpt1;Agt;Agtr1a;Ahr;Apaf1;Ar;Areg;Rhoa;Rhob;Bak1;Bax;Phb2;Bcl10;Bcl2;Bmp2;Bmp4;Bmp7;Gdf2;Btrc;Casp8;Casr;Ctnnb1;Cd44;Celsr1;Cfl1;Cxcr2;Cxcr4;Cobl;Col4a1;Coq7;Csf1;Csnk2b;Ctsh;Dag1;Dlg1;Dll1;Dvl1;Edn1;Ednra;Efnb2;Egf;Enah;Eng;Epha2;Epha4;Epha7;Esr1;Eya1;Foxh1;Lgr5;Fgf1;Fgf2;Fg…	18	Ddr1;Dvl2;Dvl3;Kat2a;Lrp5;Notch1;Notch4;Prkaca;Rara;Rarg;Tsc2;Shank3;Med12;Fuz;Scrib;Plxnb2;Megf8;Tctn1
GO:0019898	black	extrinsic component of membrane	CC	0.0617284	243	2.78589	Bsn;Csk;Gna12;Gnai2;Gnb2;Pik3r2;Apc2;Tnk2;Tyk2;Pvrl1;Snx11;Hid1;Snx8;Rnf40;Sarm1;Abl1;Abl2;Aldh3a2;Alox8;Apc;Apoe;Arsa;Atp2a2;Bcl2l11;Bmx;Btk;Anxa2;Ctnna1;Ctnnb1;Cav2;Cdh1;Cdh2;Cnr2;Dmbt1;Dlg4;Dtna;Eno1;Epb41l1;Epb41l2;Epb41l3;Epb41l4a;Ptk2;Fer;Fes;Fgr;Frk;Fyn;Gfra1;Ghr;Gna11;Gna13;Gna14;Gna15;Gnai1;Gnai3;Gnal;Gnao1;Gnaq;Gnas;Gnat1;Gnat2;Gnaz;Gnb1;Gnb3;Gnb4;Gng10;Gng12;Gng2;Gng3;Gng4;Gng7;Gng8;Gn…	15	Bsn;Csk;Gna12;Gnai2;Gnb2;Pik3r2;Apc2;Tnk2;Tyk2;Pvrl1;Snx11;Hid1;Snx8;Rnf40;Sarm1
GO:0030136	black	clathrin-coated vesicle	CC	0.0833333	84	2.77581	Dnm2;Dvl2;Lrp1;Furin;Hip1r;Tnk2;Fam109a;Ap1g1;Ap1s1;Rab27a;Atp7a;Ctla4;Clta;Cpne6;Dab2;Dvl1;Edn1;Epn2;Eps15;Htt;Igf2r;Lyz2;Lyz1;Rab8a;Myo6;Ngfr;Numb;Slc2a4;Snap91;Sort1;Tgoln1;Vamp2;Vamp3;Vwf;Hax1;Bcap31;Spg21;Vti1a;Snx3;Rgs19;Slc5a7;Nrgn;Necap2;Snx9;Cltc;Necap1;Rab14;Lmbrd1;Unc13d;Myo1e;Epn3;Tbc1d5;Sgip1;Steap2;Gga2;Cltb;Clvs1;Rab35;Rab27b;Vps16;Cemip;Gopc;Ldlrap1;Inpp5f;Scamp1;Ston2;Snx18;Hip1;…	7	Dnm2;Dvl2;Lrp1;Furin;Hip1r;Tnk2;Fam109a
GO:0008203	black	cholesterol metabolic process	BP	0.0784314	102	2.77385	Abca2;Abcg1;Fdxr;Lrp1;Lrp5;Srebf1;Hnf1a;Scap;Abca1;Acadl;Acadvl;Aplp2;Apoa1;Apoa2;Apoc3;Apoe;App;Cat;Cebpa;Cel;Cftr;Ch25h;Cyp46a1;Cyp51;Cyp7b1;Dhcr7;Ebp;Ephx2;Fdft1;Fdx1;Fech;Fgf1;G6pdx;Hmgcr;Hmgcs2;Lipc;Hsd17b7;Il4;Lcat;Ldlr;Lepr;Lipe;Lss;Mt3;Mttp;Mvk;Npc1;Nsdhl;Pctp;Por;Pex2;Scp2;Soat1;Sod1;Sorl1;Sqle;Scarb1;Srebf2;Thrb;Tnfsf4;Vldlr;Cln8;Angptl3;Cyp39a1;Mbtps1;Cubn;Dgat2;Sec14l2;Cela3b;Npc2;Pmv…	8	Abca2;Abcg1;Fdxr;Lrp1;Lrp5;Srebf1;Hnf1a;Scap
GO:0010975	black	regulation of neuron projection development	BP	0.0533333	450	2.77311	Adnp;Cux2;Dnm2;Mark2;Hap1;Inppl1;Limk1;Lrp1;Nkx6-1;Numbl;Stk11;Map2k2;Shank3;Smurf1;Anapc2;Golga2;Plxnb2;Ppp2r5b;Zmynd8;Plxnb1;Sarm1;Megf8;Crtc1;Gsk3a;Aatk;Abl1;Abl2;Ache;Chrnb2;Adamts1;Adcy6;Adcyap1;Avil;Agrn;Akt1;Apbb1;Apoe;Arf1;Arf6;Rhoa;Rnd2;Arsb;Atf1;Neurog3;B2m;Bdnf;Bmp4;Bmp5;Bmp7;Bmpr2;Cacna1a;Camk2b;Cbfa2t2;Cd24a;Cdh2;Cdh4;Cdk5;Cdk5r1;Cfl1;Cit;Ccr5;Cnr1;Cntf;Cntn1;Cobl;Cpeb1;Cpne6;Crabp2;…	24	Adnp;Cux2;Dnm2;Mark2;Hap1;Inppl1;Limk1;Lrp1;Nkx6-1;Numbl;Stk11;Map2k2;Shank3;Smurf1;Anapc2;Golga2;Plxnb2;Ppp2r5b;Zmynd8;Plxnb1;Sarm1;Megf8;Crtc1;Gsk3a
GO:0060047	black	heart contraction	BP	0.06875	160	2.77001	Cacna1c;Gaa;Hcn2;Kcnh2;Psen2;Slc9a1;Srebf1;Thra;Vegfb;Sptbn4;Gsk3a;Ace;Chrna7;Actc1;Ada;Adm;Adora1;Adra1b;Adra1a;Adrb1;Adrb2;Agrn;Agt;Atg5;Atp1a1;Atp1b1;Atp2a2;Cacna1b;Cacna1d;Cacna1e;Cacna1g;Calca;Casq2;Cav1;Cdc42;Chga;Cxcr4;Crhr2;Cxadr;Dmpk;Dmd;Drd2;Dsc2;Dsg2;Edn1;Edn2;Edn3;Epas1;Ctgf;Fkbp1b;Gata4;Gja1;Gja5;Glp1r;Gnao1;Gpx1;Hbegf;Hey2;Hrc;Il2;Jak2;Jup;Kcna5;Kcnj2;Kcnq1;Smad5;Smad7;Mdm2;Mdm4;Mef…	11	Cacna1c;Gaa;Hcn2;Kcnh2;Psen2;Slc9a1;Srebf1;Thra;Vegfb;Sptbn4;Gsk3a
GO:0008047	black	enzyme activator activity	MF	0.0551181	381	2.74971	Cdk5r2;Arhgef1;Nprl3;Sipa1;Stk11;Tsc2;Map2k2;Adrm1;Arhgap23;Mapk8ip2;Tbc1d13;Sipa1l3;Tbc1d9b;Sgsm3;Rap1gap;Ppp2r4;Agap3;Git1;Llgl2;Arhgap33;Tbc1d2;Abi1;Angpt4;Alox5ap;Apaf1;Apoa1;Apoa2;Apobec1;Apoe;Apoh;App;Arf1;Arhgap5;Arhgap6;Arhgdib;Atp1b1;Atp1b2;Atp1b3;Atp7a;Axin1;Axin2;Bad;Bcl10;Bmp2;Cab39;Casp3;Cav1;Ccs;Cd24a;Arhgap31;Cdk5r1;Cdkn1a;Cdkn1b;Cflar;Chm;Chml;Cox17;Ctsc;Ctsh;Daxx;Asap1;Ect2;Erbb3…	21	Cdk5r2;Arhgef1;Nprl3;Sipa1;Stk11;Tsc2;Map2k2;Adrm1;Arhgap23;Mapk8ip2;Tbc1d13;Sipa1l3;Tbc1d9b;Sgsm3;Rap1gap;Ppp2r4;Agap3;Git1;Llgl2;Arhgap33;Tbc1d2
GO:0003205	black	cardiac chamber development	BP	0.070922	141	2.74834	Dnm2;Dvl3;Lrp1;Nprl3;Notch1;Rara;Zfpm1;Ube4b;Fuz;Gsk3a;Acvr1;Adamts1;Ahr;Prdm1;Ctnnb1;Cxcr4;Col11a1;Cpe;Epor;Foxh1;Fgf9;Fgfr2;Fkbp1a;Foxc2;Fzd1;Gata3;Gata4;Gata6;Gja5;Lrp2;Hand2;Hes1;Hey1;Hey2;Foxf1;Hif1a;Ndst1;Id2;Cyr61;Isl1;Jag1;Kif7;Lmo4;Lrp6;Ly6e;Smad4;Smad6;Smad7;Matr3;Mdm2;Mdm4;Mef2c;Mesp1;Foxc1;Cited2;Mybpc3;Naca;Nfatc1;Notch2;Pcsk5;Pou4f1;Med1;Prox1;Rbp4;Rbpj;Robo1;Dhrs3;Rxra;Ryr2;Scn5a;S…	10	Dnm2;Dvl3;Lrp1;Nprl3;Notch1;Rara;Zfpm1;Ube4b;Fuz;Gsk3a
GO:0032869	black	cellular response to insulin stimulus	BP	0.070922	141	2.74834	Eif4ebp2;Inppl1;Pik3r2;Shc1;Slc9a1;Srebf1;Tsc2;Ncoa5;Wdtc1;Gsk3a;Parp1;Ahsg;Akt1;Akt2;Cav2;Cdk2;Cish;Socs3;Socs1;Cpeb1;Bcar1;Eif4ebp1;Ptprv;Fer;Foxc2;Lpin1;Gpam;Gpld1;Grb10;Grb2;Hnrnpk;Igf1r;Igf2;Il1b;Ins2;Insr;Irs1;Irs3;Irs4;Kl;Rab8a;Mstn;Myo5a;Ngfr;Pak1;Kat2b;Pdk2;Enpp1;Pdpk1;Pik3r1;Pik3r3;Prkca;Prkcb;Prkcd;Prkci;Prkcq;Prkcz;Pklr;Plcb1;Pparg;Inpp5k;Prkdc;Ptpn1;Ptpn11;Ptpn2;Ptpra;Ptpre;Ptprf;Rab…	10	Eif4ebp2;Inppl1;Pik3r2;Shc1;Slc9a1;Srebf1;Tsc2;Ncoa5;Wdtc1;Gsk3a
GO:0009953	black	dorsal/ventral pattern formation	BP	0.0823529	85	2.74007	Lrp5;Nkx2-2;Nkx6-1;Prkaca;Psen2;Fuz;Tctn1;Acvr1;Apc;Axin1;Axin2;Bmp4;Bmpr1a;Bmpr1b;Ctnnb1;Cer1;Chrd;Ddit3;Edn1;Egf;Evx1;Fkbp8;Fzd5;Gas1;Gli1;Gli2;Gli3;Nkx6-2;Foxg1;Mnx1;Foxa1;Foxa2;Hoxa2;Kif3a;Lhx1;Lhx3;Lrp6;Smad2;Smad6;Ascl1;Mdfi;Nbl1;Pax6;Prkacb;Psen1;Ptch1;Rab23;Sfrp1;Shh;Tgif1;Ift88;Nkx2-1;Tulp3;Wnt3;Grem1;Grem2;Sufu;Map3k4;Mapk8;Dll4;Rgs19;Rgs20;Dusp6;Ift172;Arl13b;Disp1;Rfx4;Ttc21b;Traf3ip1…	7	Lrp5;Nkx2-2;Nkx6-1;Prkaca;Psen2;Fuz;Tctn1
GO:0042158	black	lipoprotein biosynthetic process	BP	0.0823529	85	2.74007	Pigq;Pigo;Zdhhc1;Pigt;Zdhhc9;Pigs;Pgap3;Abca1;Alox12b;Atg5;Apoa1;Apobec1;Apoe;Dpm1;Dpm2;Gpaa1;Lcat;Mttp;Nmt1;Nmt2;Piga;Pigf;Ppm1a;Ppm1b;Pign;Zdhhc8;Wipi1;Porcn;Wdr45;Pigb;Pigp;Golga7;Zdhhc12;Alg5;Pigyl;Pyurf;Atg4b;Atg10;Wdr45b;Zdhhc6;Pigc;Atg12;Pigm;Zdhhc21;Dpm3;Zdhhc3;Pigw;Zdhhc2;Pigx;Zdhhc16;Atg7;Hhatl;Wipi2;Svip;Zdhhc20;Clip3;Selk;Rab3gap2;Zdhhc7;Zdhhc15;Pigh;Map6d1;Zdhhc14;Mppe1;Rab3gap1;Hhat…	7	Pigq;Pigo;Zdhhc1;Pigt;Zdhhc9;Pigs;Pgap3
GO:1901653	black	cellular response to peptide	BP	0.0659341	182	2.73583	Csk;Eif4ebp2;Inppl1;Pik3r2;Shc1;Slc9a1;Srebf1;Tsc2;Adrm1;Ncoa5;Wdtc1;Gsk3a;Adcy6;Parp1;Ahsg;Akt1;Akt2;Anxa5;Casp4;Ctnnb1;Cav1;Cav2;Cdk2;Cish;Socs3;Socs1;Cpeb1;Crhbp;Crhr1;Bcar1;Eif4ebp1;Ptprv;Ptk2;Fer;Foxc2;Lpin1;Gcgr;Ghr;Gpam;Gpld1;Grb10;Grb2;Nr4a1;Hnrnpk;Hsf1;Igf1;Igf1r;Igf2;Il18;Il1b;Ins2;Insr;Irf1;Irs1;Irs3;Irs4;Jak2;Kl;Arhgef2;Rab8a;Mstn;Myo5a;Nfkb1;Ngfr;Nr4a3;Nr4a2;Pak1;Kat2b;Pdk2;Enpp1;Pdp…	12	Csk;Eif4ebp2;Inppl1;Pik3r2;Shc1;Slc9a1;Srebf1;Tsc2;Adrm1;Ncoa5;Wdtc1;Gsk3a
GO:0003015	black	heart process	BP	0.0679012	162	2.72479	Cacna1c;Gaa;Hcn2;Kcnh2;Psen2;Slc9a1;Srebf1;Thra;Vegfb;Sptbn4;Gsk3a;Ace;Chrna7;Actc1;Ada;Adm;Adora1;Adra1b;Adra1a;Adrb1;Adrb2;Agrn;Agt;Atg5;Atp1a1;Atp1b1;Atp2a2;Cacna1b;Cacna1d;Cacna1e;Cacna1g;Calca;Casq2;Cav1;Cdc42;Chga;Cxcr4;Crhr2;Cxadr;Dmpk;Dmd;Drd2;Dsc2;Dsg2;Edn1;Edn2;Edn3;Epas1;Ctgf;Fkbp1b;Gata4;Gja1;Gja5;Glp1r;Gnao1;Gpx1;Hbegf;Hey2;Hrc;Il2;Jak2;Jup;Kcna5;Kcnj2;Kcnq1;Smad5;Smad7;Mdm2;Mdm4;Mef…	11	Cacna1c;Gaa;Hcn2;Kcnh2;Psen2;Slc9a1;Srebf1;Thra;Vegfb;Sptbn4;Gsk3a
GO:0016358	black	dendrite development	BP	0.0622222	225	2.72232	Cux2;Numbl;Stk11;Mink1;Slc12a5;Shank3;Mapk8ip2;Pak4;Anapc2;Git1;Zmynd8;Sarm1;Crtc1;Gsk3a;Abl2;Ache;Chrnb2;Apoe;App;Arf1;Arf4;Arf6;Rhoa;Neurog3;Atp7a;Bdnf;Bmp5;Bmp7;Cacna1a;Camk2b;Ctnna2;Cdk5;Cdk5r1;Cfl1;Chat;Cit;Cobl;Crp;Cux1;Dab1;Dclk1;Dcx;Asap1;Dlg4;Dscam;Dvl1;Eef2k;Efna1;Eif4g2;Epha4;Epha5;Ephb2;Ephb3;Bcl11a;Ezh2;Fas;Fmn1;Fmr1;Srgap2;Fyn;Lpar1;Grin1;Nr3c1;Grn;Hdac2;Hdac6;Hnrnpk;Hprt;Sdc2;Elavl…	14	Cux2;Numbl;Stk11;Mink1;Slc12a5;Shank3;Mapk8ip2;Pak4;Anapc2;Git1;Zmynd8;Sarm1;Crtc1;Gsk3a
GO:0051453	black	regulation of intracellular pH	BP	0.0961538	52	2.71629	Slc4a3;Slc9a1;Atp6v0a2;Slc12a5;Slc9a8;Atp5b;Atp6v0a1;Atp6v0c;Bcl2;Car2;Car7;Cftr;Clcn3;Cln3;Slc26a3;Slc26a2;Fasl;Slc11a1;Ppt1;Rab20;Rab7;Slc4a2;Snapin;Tmem165;Trp53;Slc26a4;Tcirg1;Clic4;Ttpa;Avpr1a;Chp1;Aqp11;Lrrk2;Gpr89;Tmem175;Rab38;Slc17a7;Slamf8;Cln6;Slc26a5;Atp6v0b;Atp6v0a4;Slc26a6;Slc26a7;Cln5;Slc26a10;Slc26a8;Slc26a1;Nox1;Slc26a11;Rab39;Slc26a9	5	Slc4a3;Slc9a1;Atp6v0a2;Slc12a5;Slc9a8
GO:0090559	black	regulation of membrane permeability	BP	0.0961538	52	2.71629	Slc9a1;Zfp13;Naif1;Rhot2;Gsk3a;Slc25a4;Slc25a5;Atf2;Atpif1;Bad;Bak1;Bax;Bcl2;Bcl2l1;Bid;Bcl2l11;Bnip3;Bnip3l;Camk2a;Cnp;Eya2;Htt;Hk2;Hspa8;Ier3;F11r;Lbp;Mt3;Stat3;Tjp2;Trp53;Siva1;Acaa2;Sh3glb1;Hebp2;Mtch2;Gsk3b;Mtor;Pmaip1;Rhot1;Moap1;Alkbh7;Mul1;Plekhf1;Bloc1s2;Slc35f6;Them4;Nol3;Mpv17l;Ppif;Bbc3;Tmem102	5	Slc9a1;Zfp13;Naif1;Rhot2;Gsk3a
GO:0007169	black	transmembrane receptor protein tyrosine kinase signaling pathway	BP	0.0527473	455	2.71576	Ddr1;Csk;Eif4ebp2;Hap1;Inppl1;Lrp1;Notch1;Pik3r2;Psen2;Shc1;Srebf1;Tsc2;Vegfb;Tnk2;Tyk2;Adrm1;Gigyf1;Rnf126;Fuz;Prkd2;Git1;Ppp2r5b;Ncoa5;Gsk3a;Abl1;Abl2;Adam17;Adora1;Adra2a;Angpt1;Angpt2;Angpt4;Agt;Ahsg;Akt1;Akt2;Alk;Aplp2;Apod;App;Ar;Areg;Arf4;Bdnf;Bmp2;Bmp4;Bmp5;Bmpr2;Bmx;Btc;Btk;Caml;Casp3;Ctnnb1;Cav2;Runx2;Cbl;Cd59a;Cd63;Cdh13;Cdh3;Cdk5r1;Cish;Socs3;Socs1;Bcar1;Crk;Csf1;Csf1r;Dcn;Dll1;Dok1;D…	24	Ddr1;Csk;Eif4ebp2;Hap1;Inppl1;Lrp1;Notch1;Pik3r2;Psen2;Shc1;Srebf1;Tsc2;Vegfb;Tnk2;Tyk2;Adrm1;Gigyf1;Rnf126;Fuz;Prkd2;Git1;Ppp2r5b;Ncoa5;Gsk3a
GO:0016241	black	regulation of macroautophagy	BP	0.0769231	104	2.71204	Kat2a;Srebf1;Tsc2;Mapk3;Ubqln2;Ubqln4;Ehmt2;Gsk3a;Adrb2;Atg5;Atp6v0a1;Bnip3;Bnip3l;Tspo;Cln3;Csnk2a2;Ctsk;Cttn;Dcn;Epm2a;Fzd5;Gba;Hif1a;Hmox1;Kdr;Mtm1;Npc1;Sqstm1;Pafah1b2;Pikfyve;Pim2;Pip4k2a;Rab12;Rab20;Rab33a;Rab33b;Rab7;Rpl28;Sptlc2;Srebf2;Supt5;Ift88;Trp53;U2af2;Ulk1;Vdac1;Zbtb17;Tlr2;Zdhhc8;Fbxw7;Rnf5;Sh3glb1;Ift20;Ubqln1;Becn1;Scoc;Actl6a;Tbk1;Ruvbl1;Mtor;Wbp11;Ralb;Tsc1;Trim13;Lrrk2;Map1l…	8	Kat2a;Srebf1;Tsc2;Mapk3;Ubqln2;Ubqln4;Ehmt2;Gsk3a
GO:0030010	black	establishment of cell polarity	BP	0.0769231	104	2.71204	Mark2;Stk11;Sipa1l3;Scrib;Llgl2;Fbf1;Myo18a;Brsk1;Arf6;Cdh5;Cenpa;Cfl1;Ccr7;Eya1;Fscn1;Fgf13;Flot2;Gata3;Gja1;Htt;Hes1;Hey1;Foxj1;Foxf1;Igf1r;Lama1;Arhgef2;Llgl1;Lmna;Msn;Map1b;Map2;Map4;Myh9;Myo9b;Pafah1b1;Pax6;Prkci;Prkcz;Pkd1;Cyth1;Cyth3;Ptk2b;Rab10;Rock1;Exoc4;Shh;Tcf15;Wee1;Wnt5a;Nek3;Ccl19;Spry1;Spry2;Slc9a3r1;Zw10;Amot;Rufy3;Spag5;Mpp5;Pard6a;Gsk3b;Golph3;Ndc80;Nde1;Dock7;Rnf41;Spdl1;Ptk7;…	8	Mark2;Stk11;Sipa1l3;Scrib;Llgl2;Fbf1;Myo18a;Brsk1
GO:0017048	black	Rho GTPase binding	MF	0.0813953	86	2.70485	Dvl2;Dvl3;Fmnl3;Inf2;Pak4;Cdc42bpb;Pkn1;Cav1;Cit;Dapk3;Diaph1;Dvl1;Ect2;Eps8;Srgap2;Kif3b;Arhgef2;Ncf2;Pak1;Pak3;Pfn1;Rab7;Ralbp1;Rock1;Rock2;Rtkn;Cyfip1;Sod1;Tiam1;Tnfaip1;Vcl;Coro1c;Map3k11;Iqgap1;Nckap1;Diaph2;Net1;Diaph3;Pard6a;Cdc42ep4;Fmnl1;Cdc42ep5;Lrrk2;Dock7;Exoc1;Stk26;Fmnl2;Als2;Akap13;Dock11;Daam2;Wasf1;Brk1;Cdc42ep2;Cdc42ep1;Dock9;Rcc2;Vps4a;Srgap1;Arhgap4;Flna;Arhgdia;Daam1;Hace1;Do…	7	Dvl2;Dvl3;Fmnl3;Inf2;Pak4;Cdc42bpb;Pkn1
GO:0010506	black	regulation of autophagy	BP	0.0652174	184	2.69457	Kat2a;Pik3r2;Srebf1;Stk11;Tsc2;Mapk3;Ubqln2;Trim8;Ubqln4;Golga2;Ehmt2;Gsk3a;Adrb2;Ager;Akt1;Atg5;Atm;Atp6v0a1;Bcl2;Bnip3;Bnip3l;Tspo;Casp1;Rb1cc1;Cln3;Csnk2a2;Ctsk;Cttn;Dcn;Epm2a;Fzd5;Gata4;Gba;Gfap;Hif1a;Hmox1;Htr2b;Kdr;Lepr;Lmx1b;Mt3;Mapt;Mtm1;Npc1;Sqstm1;Pafah1b2;Pikfyve;Pim2;Pip4k2a;Ctsa;Ptpn22;Rab12;Rab20;Rab33a;Rab33b;Rab7;Rpl28;Snca;Plk2;Sptlc2;Srebf2;Trim21;Supt5;Tfeb;Ift88;Tnfaip3;Trp53;…	12	Kat2a;Pik3r2;Srebf1;Stk11;Tsc2;Mapk3;Ubqln2;Trim8;Ubqln4;Golga2;Ehmt2;Gsk3a
GO:0017053	black	transcriptional repressor complex	CC	0.0869565	69	2.68872	Ctbp1;Mbd3;Ncor2;Zfpm1;Gps2;Mta1;Cbx5;Ccnd1;Cdx2;Csnk2a1;Ctbp2;Gata1;Gfi1;Gli3;Hdac2;Hdac3;Hdac5;Hdgf;Hey2;Jun;Rbbp4;Rest;Ncor1;Sin3a;Ski;Sp3;Tbl1x;Tbx15;Mta2;Etv3;Sall2;Insm1;Ddx20;Ywhab;Spen;C1d;Smarce1;Sall1;Elp2;Nacc2;Smarcc2;Prdm16;Mier1;Lin9;Appl1;Lin37;Depdc1a;Bhlhe41;Tbl1xr1;Tfap4;Coro2a;Chd4;Mta3;Hdac4;Appl2;Chd3;Rcor1;Rbbp8;Gatad2b;Jazf1;Gatad2a;Zbtb16;Arid4a;Rbbp7;Phf12;Chd5;N4bp2l2;Ak…	6	Ctbp1;Mbd3;Ncor2;Zfpm1;Gps2;Mta1
GO:1902652	black	secondary alcohol metabolic process	BP	0.0761905	105	2.68167	Abca2;Abcg1;Fdxr;Lrp1;Lrp5;Srebf1;Hnf1a;Scap;Abca1;Acadl;Acadvl;Aplp2;Apoa1;Apoa2;Apoc3;Apoe;App;Cat;Cebpa;Cel;Cftr;Ch25h;Cyp27b1;Cyp46a1;Cyp51;Cyp7b1;Dhcr7;Ebp;Ephx2;Fdft1;Fdx1;Fech;Fgf1;Fgfr1;Fgfr4;G6pdx;Hmgcr;Hmgcs2;Lipc;Hsd17b7;Il4;Lcat;Ldlr;Lepr;Lipe;Lss;Mt3;Mttp;Mvk;Npc1;Nsdhl;Pctp;Por;Pex2;Scp2;Soat1;Sod1;Sorl1;Sqle;Scarb1;Srebf2;Thrb;Tnfsf4;Vldlr;Cln8;Angptl3;Cyp39a1;Mbtps1;Cubn;Dgat2;Sec…	8	Abca2;Abcg1;Fdxr;Lrp1;Lrp5;Srebf1;Hnf1a;Scap
GO:0001764	black	neuron migration	BP	0.0694444	144	2.67491	Cdk5r2;Mark2;Adgrg1;Nkx6-1;Pcnt;Plxnb2;Scrt1;Nav1;Unk;Mkl1;Apbb1;Apbb2;Nr2f2;Arx;Astn1;Neurog2;Bax;Aspm;Ctnnb1;Cck;Cckar;Cdh1;Cdk5;Cdk5r1;Celsr1;Chl1;Cxcr4;Ccr4;Col3a1;Dab1;Dclk1;Dcc;Dcx;Drd1;Drd2;Nr2f1;Erbb4;Ptk2;Fgf13;Srgap2;Fyn;Fzd3;Gas6;Gata2;Gata3;Gfra3;Gja1;Gnrh1;Foxg1;Mnx1;Hsp90aa1;Il1r1;Itga3;Lhx1;Lhx6;Lmx1b;Ascl1;Matn2;Mef2c;Met;Mapt;Ndn;Nrg3;Nrp1;Nrp2;Ntn1;Ntrk2;Ntrk3;Nr4a2;Pafah1b1;Pax…	10	Cdk5r2;Mark2;Adgrg1;Nkx6-1;Pcnt;Plxnb2;Scrt1;Nav1;Unk;Mkl1
GO:0007405	black	neuroblast proliferation	BP	0.0943396	53	2.66602	Notch1;Numbl;Plxnb2;Daglb;Zfp335;Bdnf;Aspm;Ctnna1;Ctnnb1;Cd24a;Cx3cr1;Dct;Drd2;Fgf13;Fgfr1;Fgfr2;Fzd3;Fzd9;Gli3;Foxg1;Hif1a;Id4;Kcna1;Lef1;Lrp6;Ascl1;Nf1;Numb;Pafah1b1;Pax6;Rab10;Bex1;Cx3cl1;Shh;Sox10;Sox5;Tead3;Tgfb1;Trp53;Vegfa;Vegfc;Lrrk2;Smarcd3;Nde1;Dock7;Eml1;Acsl6;Kctd11;Dmrta2;Disc1;Dagla;Smo;Frs2	5	Notch1;Numbl;Plxnb2;Daglb;Zfp335
GO:0001078	black	transcriptional repressor activity, RNA polymerase II core promoter proximal region sequence-specific binding	MF	0.0754717	106	2.65165	Cux2;Zbtb7a;Nkx6-1;Tcf3;Zfpm1;Klf16;Cc2d1a;Mypop;Aebp2;Atf3;Neurog3;Bach1;Prdm1;Btg2;Crebbp;Ctcf;Dach1;Bcl11a;Gata1;Gata3;Gfi1;Nkx6-2;Hdgf;Hes1;Hey1;Hhex;Hoxa2;Hsf1;Ifi203;Ifi204;Mxd1;Ascl1;Nfatc2;Nfe2l3;Nfil3;Ovol1;Ppara;Prox1;Rela;Rest;Spi1;Skil;Snai2;Ighmbp2;Snai1;Sp3;Srebf2;Bhlhe40;Tbx15;Tbx2;Tbx3;Tcf21;Tgif1;Nr2c1;Yy1;Zfp148;Zfp90;Zfpm2;Ets2;Esrra;Insm1;Irf3;Foxo1;Kcnip3;Zbtb20;Ylpm1;Sall1;M…	8	Cux2;Zbtb7a;Nkx6-1;Tcf3;Zfpm1;Klf16;Cc2d1a;Mypop
GO:0042157	black	lipoprotein metabolic process	BP	0.0754717	106	2.65165	Pigq;Lypla2;Pigo;Zdhhc1;Pigt;Zdhhc9;Pigs;Pgap3;Abca1;Alox12b;Atg5;Apoa1;Apoa2;Apobec1;Apoc3;Apod;Apoe;Atm;Dpm1;Dpm2;Gpaa1;Itgav;Itgb3;Lcat;Ldlr;Lipg;Mttp;Nmt1;Nmt2;Pemt;Piga;Pigf;Lypla1;Ppara;Ppm1a;Ppm1b;Ppt1;Pla2g7;Pign;Zdhhc8;Wipi1;Porcn;Wdr45;Apom;Pigb;Pigp;Golga7;Zdhhc12;Alg5;Pigyl;Pyurf;Atg4b;Atg10;Wdr45b;Zdhhc6;Pigc;Atg12;Pigm;Dgat2;Zdhhc21;Dpm3;Zdhhc3;Pigw;Zdhhc2;Pigx;Zdhhc16;Atg7;Hhatl;Wi…	8	Pigq;Lypla2;Pigo;Zdhhc1;Pigt;Zdhhc9;Pigs;Pgap3
GO:0060070	black	canonical Wnt signaling pathway	BP	0.0625	208	2.6394	Dvl2;Dvl3;Lrp5;Notch1;Stk11;Thra;Tle2;Apc2;Med12;Pygo2;Fuz;Bcl9l;Csnk1d;Apc;Xiap;Arntl;Axin1;Axin2;Btrc;Aspm;Ctnnb1;Ctnnd1;Cav1;Ccnd1;Cdc42;Cdh1;Cdh2;Cdh3;Col1a1;Dab2;Dapk3;Ddit3;Dvl1;Eda;Egf;Egr1;Emd;Lgr5;Fgf2;Fgf9;Fgfr2;Fgfr3;Folr1;Fzd1;Fzd3;Fzd4;Fzd5;Fzd6;Fzd7;Fzd8;Fzd9;Gata3;Gata4;Gli1;Gli3;Gpc3;Aes;Hdac2;Hoxb9;Ilk;Ins2;Invs;Isl1;Klf4;Lats1;Lef1;Lrp6;Smad3;Mesp1;Mgat3;Mitf;Usp34;Myc;Nfkb1;Ctn…	13	Dvl2;Dvl3;Lrp5;Notch1;Stk11;Thra;Tle2;Apc2;Med12;Pygo2;Fuz;Bcl9l;Csnk1d
GO:0034968	black	histone lysine methylation	BP	0.0786517	89	2.6021	Paxip1;Pygo2;Ehmt2;Kdm4b;Auts2;Zfp335;Kmt2d;Brca1;Ctnnb1;Dnmt1;Dnmt3b;Eed;Ezh1;Ezh2;Gata3;Gcg;Gfi1;Hist1h1d;Hdac2;Jarid2;Smad4;Men1;Mtf2;Myb;Nsd1;Smarcb1;Supt6;Suv39h1;Phf1;Ctr9;Ash2l;Nelfa;H2afy;Hist1h1c;Hist1h1e;Suz12;Setd3;Ncoa6;Suv39h2;Setd6;Dpy30;Wdr61;Snw1;Setd8;Pih1d1;Kmt2e;Smyd3;Prdm5;Bcor;Setd7;Iws1;Phf19;Cxxc1;Setmar;Asxl2;Kmt2b;Rtf1;Kdm4c;Wdr82;Ehmt1;Setdb1;Sirt1;Arid4b;Kdm1a;Airn;Kdm3…	7	Paxip1;Pygo2;Ehmt2;Kdm4b;Auts2;Zfp335;Kmt2d
GO:0051056	black	regulation of small GTPase mediated signal transduction	BP	0.0634921	189	2.59369	Dnm2;Adgrg1;Arhgef1;Mcf2l;Sipa1;Tsc2;Psd;Sipa1l3;Plekhg2;Dgkz;Rap1gap;Mfn2;Abca1;Abl2;Adra1b;Adra1a;Apoa1;Apoe;Arf6;Bcl6;Bnip2;Cdh2;Col3a1;Crk;Csf1;Ect2;Erbb2;Fgd6;F2r;F2rl1;Fbp1;Fgd1;Foxm1;Flot1;Lpar1;Hras;Igf1;Itga3;Itgb1;Itsn1;Kras;Arhgef2;Kitl;Myoc;Nf1;Ngfr;Notch2;Pdgfrb;Ppp2cb;Cyth1;Cyth2;Cyth3;Rasa3;Rasal1;Rasgrf1;Rasgrf2;Rasgrp1;Reln;Rgl2;Stmn3;Itsn2;Slit2;Sos1;Sos2;Tiam1;Timp2;Tnfaip1;Vav…	12	Dnm2;Adgrg1;Arhgef1;Mcf2l;Sipa1;Tsc2;Psd;Sipa1l3;Plekhg2;Dgkz;Rap1gap;Mfn2
GO:0022604	black	regulation of cell morphogenesis	BP	0.0509165	491	2.58666	Adnp;Cux2;Dnm2;Mark2;Gna12;Hap1;Limk1;Nkx6-1;Notch1;Numbl;Stk11;Fmnl3;Map2k2;Shank3;Fuz;Kctd17;Smurf1;Bcl9l;Pofut2;Anapc2;Golga2;Plxnb2;Plxnb1;Sarm1;Megf8;Aatk;Abl1;Ache;Chrnb2;Ager;Agrn;Aldoa;Anxa7;Atg5;Apoa1;Apoe;Arc;Rnd2;Neurog3;Axin2;Bdnf;Bmp2;Bmpr2;C1qbp;Cacna1a;Calr;Camk2b;Capzb;Ctnnb1;Cdh2;Cdh4;Cdk5;Cdk5r1;Cfl1;Cit;Cited1;Coro1a;Ccr5;Coch;Col1a1;Cpne6;Crabp2;Dpysl2;Csf1r;Cttn;Cux1;Dab1;Dab…	25	Adnp;Cux2;Dnm2;Mark2;Gna12;Hap1;Limk1;Nkx6-1;Notch1;Numbl;Stk11;Fmnl3;Map2k2;Shank3;Fuz;Kctd17;Smurf1;Bcl9l;Pofut2;Anapc2;Golga2;Plxnb2;Plxnb1;Sarm1;Megf8
GO:0050890	black	cognition	BP	0.0600858	233	2.58146	Adnp;Cacna1c;Cux2;Eif4ebp2;Psen2;Thra;Slc12a5;Jph3;Shank3;Mapk8ip2;Hrh3;Ehmt2;Slc8a2;Crtc1;Abl2;Asic1;Chrna4;Chrna7;Chrnb2;Adcy8;Adora1;Adra1b;Adrb1;Adrb2;Apbb1;App;Arf4;Atp8a1;Bche;Bdnf;Btg2;Cacna1e;Calb1;Camk4;Casp1;Casp3;Cdk5;Chat;Chl1;Chrm1;Cln3;Cnr1;Comt;Creb1;Crhr1;Cx3cr1;Cyp7b1;Dbi;Dgcr2;Drd1;Drd2;Drd3;Egfr;Egr1;Ephb2;Epm2a;Fen1;Fgf13;Aff2;Fzd9;Glp1r;Gm2a;Gnas;Grin1;Grin2a;Grin2b;Grpr;Htt;…	14	Adnp;Cacna1c;Cux2;Eif4ebp2;Psen2;Thra;Slc12a5;Jph3;Shank3;Mapk8ip2;Hrh3;Ehmt2;Slc8a2;Crtc1
GO:0051091	black	positive regulation of sequence-specific DNA binding transcription factor activity	BP	0.0631579	190	2.57389	Dvl2;Lrp5;Nkx2-2;Tcf3;Rbck1;Ube2v1;Crtc3;Trappc9;Trim8;Prkd2;Ppp2r5b;Crtc1;Adam8;Ager;Akt1;Amh;Anxa3;Prdx3;Ar;Atf2;Neurog2;Neurog3;Phb2;Bcl10;Bdnf;Bex2;Cacna1d;Camk2a;Capn3;Cat;Ctnnb1;Cd84;Cdkn2a;Cflar;Clock;Clu;Crebbp;Crhr2;Epha5;Esr1;Fer;Fosl1;Fzd1;Fzd4;Mtpn;Hdac2;Hdac5;Hipk2;Hmga2;Foxa1;Icam1;Ifrd1;Ikbkb;Ikbkg;Il10;Il1b;Irak1;Il1rap;Il4;Il5;Il6;Ins2;Itgb2;Jak2;Jup;Kit;Kras;Arhgef2;Lrp6;Lrp8;Lr…	12	Dvl2;Lrp5;Nkx2-2;Tcf3;Rbck1;Ube2v1;Crtc3;Trappc9;Trim8;Prkd2;Ppp2r5b;Crtc1
GO:0060349	black	bone morphogenesis	BP	0.0833333	72	2.56899	Hspg2;Inppl1;Lrp5;Rara;Rarg;Megf8;Acp5;Actn3;Alpl;Axin2;Bmp4;Bmp6;Runx2;Serpinh1;Cbs;Col2a1;Col1a1;Comp;Fgf18;Fgfr2;Fgfr3;Gli3;Gnas;Has2;Lrp6;Ltbp3;Ltf;Mef2c;Mef2d;Mmp13;Mmp14;Mmp16;Cited2;Msx1;Nab1;Nab2;Nppc;Pex7;Por;Pthlh;Rab23;Dhrs3;Scx;Sfrp2;Glg1;Shox2;Ski;Sox9;Stc1;T;Tgfbr2;Thbs1;Thbs3;Twist1;Pappa2;Carm1;Ift80;Sik3;Foxn3;Insig2;Ifitm5;Osr2;Trip11;Rarb;Insig1;Cyp26b1;Csgalnact1;Phospho1;Impa…	6	Hspg2;Inppl1;Lrp5;Rara;Rarg;Megf8
GO:0030641	black	regulation of cellular pH	BP	0.0909091	55	2.56895	Slc4a3;Slc9a1;Atp6v0a2;Slc12a5;Slc9a8;Atp5b;Atp6v0a1;Atp6v0c;Bcl2;Car2;Car7;Cftr;Clcn3;Cln3;Slc26a3;Slc26a2;Fasl;Mafg;Slc11a1;Ppt1;Rab20;Rab7;Slc4a2;Snapin;Tmem165;Trp53;Slc26a4;Tcirg1;Atp1a4;Clic4;Ttpa;Avpr1a;Chp1;Aqp11;Lrrk2;Gpr89;Tmem175;Rab38;Slc17a7;Slamf8;Cln6;Slc26a5;Slc4a10;Atp6v0b;Atp6v0a4;Slc26a6;Slc26a7;Cln5;Slc26a10;Slc26a8;Slc26a1;Nox1;Slc26a11;Rab39;Slc26a9	5	Slc4a3;Slc9a1;Atp6v0a2;Slc12a5;Slc9a8
GO:0002020	black	protease binding	MF	0.0733945	109	2.5636	Bdkrb2;Dvl3;Hspg2;Lrp1;Furin;Adrm1;Syvn1;Bag6;Apc;Xiap;Serpinc1;Bcl10;Bcl2;Brca2;Anxa2;Casp12;Casp3;Cast;Cd28;Cflar;Chl1;Comp;Cradd;Cst3;Cstb;Dpp4;Ecm1;F3;Fadd;Fap;Fas;Flot1;Flot2;Fn1;Hspd1;Il1r1;Ins1;Ins2;Insl3;Itga3;Itgav;Itgb1;Itgb3;Kit;Lcn2;Ldlr;Mbl1;Mbl2;Mbp;Serpine1;Serpinf2;Polg;Rad23a;Ryr1;Sell;Serpina1a;Serpina1b;Serpina1c;Serpina1d;Serpina1e;Serpinb6a;Serpinb9;Stim1;Timp1;Timp2;Timp3;Tn…	8	Bdkrb2;Dvl3;Hspg2;Lrp1;Furin;Adrm1;Syvn1;Bag6
GO:0016125	black	sterol metabolic process	BP	0.0733945	109	2.5636	Abca2;Abcg1;Fdxr;Lrp1;Lrp5;Srebf1;Hnf1a;Scap;Abca1;Acadl;Acadvl;Aplp2;Apoa1;Apoa2;Apoc3;Apoe;App;Cat;Cebpa;Cel;Cftr;Ch25h;Cyp46a1;Cyp51;Cyp7b1;Dhcr7;Ebp;Ephx2;Fdft1;Fdx1;Fech;Fgf1;G6pdx;Hmgcr;Hmgcs2;Lipc;Hsd17b7;Il4;Lcat;Ldlr;Lepr;Lipa;Lipe;Lss;Mt3;Mttp;Mvk;Npc1;Nsdhl;Pctp;Por;Pex2;Scp2;Soat1;Sod1;Sorl1;Sqle;Scarb1;Srebf2;Thrb;Tnfsf4;Vldlr;Cln8;Angptl3;Cyp39a1;Mbtps1;0610007P14Rik;Cubn;Msmo1;Dgat…	8	Abca2;Abcg1;Fdxr;Lrp1;Lrp5;Srebf1;Hnf1a;Scap
GO:0007163	black	establishment or maintenance of cell polarity	BP	0.0671141	149	2.55648	Atn1;Mark2;Stk11;Sipa1l3;Scrib;Llgl2;Fbf1;Rltpr;Myo18a;Brsk1;Macf1;Apc;Aqp1;Arf4;Arf6;Ctnna1;Cd3g;Cdc42;Cdh5;Cdx2;Cenpa;Cfl1;Ccr7;Dlg1;Dlg4;Eya1;Fscn1;Fat1;Fgf13;Flot2;Gata3;Gja1;Htt;Hes1;Hey1;Foxj1;Foxf1;Igf1;Igf1r;Ilk;Lama1;Arhgef2;Llgl1;Lmna;Msn;Map1b;Map2;Map4;Myh9;Myo9b;Pafah1b1;Pax6;Prkci;Prkcz;Pkd1;Cyth1;Cyth3;Ptk2b;Rab10;Rock1;Exoc4;Shh;Snap91;Spint2;Tcf15;Tek;Lin7b;Lin7c;Ezr;Wee1;Wnt11;W…	10	Atn1;Mark2;Stk11;Sipa1l3;Scrib;Llgl2;Fbf1;Rltpr;Myo18a;Brsk1
GO:1901652	black	response to peptide	BP	0.0583658	257	2.55274	Csk;Eif4ebp2;Inppl1;Notch1;Pik3r2;Shc1;Slc9a1;Srebf1;Tsc2;Scly;Adrm1;Ncoa5;Wdtc1;Scap;Gsk3a;Aanat;Adcy6;Parp1;Ahsg;Akt1;Akt2;Anxa5;Apoc3;Atp2a1;Atp2a2;Avpr2;Cacybp;Casp4;Ctnnb1;Cav1;Cav2;Ccnd3;Cdk2;Cdo1;Cish;Socs3;Socs1;Cited1;Cpeb1;Creb1;Crhbp;Crhr1;Bcar1;Cry1;Cry2;Cyp27b1;Egr1;Egr2;Eif2b4;Eif4ebp1;Ptprv;Ptk2;Fer;Foxc2;Lpin1;Gcgr;Ggh;Ghr;Gpam;Gpld1;Grb10;Grb2;Nr4a1;Hnrnpk;Hsf1;Igf1;Igf1r;Igf2;Il…	15	Csk;Eif4ebp2;Inppl1;Notch1;Pik3r2;Shc1;Slc9a1;Srebf1;Tsc2;Scly;Adrm1;Ncoa5;Wdtc1;Scap;Gsk3a
GO:0043434	black	response to peptide hormone	BP	0.0595745	235	2.54711	Csk;Eif4ebp2;Inppl1;Pik3r2;Shc1;Slc9a1;Srebf1;Tsc2;Scly;Adrm1;Ncoa5;Wdtc1;Scap;Gsk3a;Aanat;Adcy6;Parp1;Ahsg;Akt1;Akt2;Anxa5;Apoc3;Atp2a1;Atp2a2;Cacybp;Ctnnb1;Cav1;Cav2;Ccnd3;Cdk2;Cdo1;Cish;Socs3;Socs1;Cited1;Cpeb1;Creb1;Crhbp;Crhr1;Bcar1;Cry1;Cry2;Cyp27b1;Egr1;Egr2;Eif2b4;Eif4ebp1;Ptprv;Ptk2;Fer;Foxc2;Lpin1;Gcgr;Ggh;Ghr;Gpam;Gpld1;Grb10;Grb2;Nr4a1;Hnrnpk;Hsf1;Igf1;Igf1r;Igf2;Il18;Il1b;Ins2;Insr;I…	14	Csk;Eif4ebp2;Inppl1;Pik3r2;Shc1;Slc9a1;Srebf1;Tsc2;Scly;Adrm1;Ncoa5;Wdtc1;Scap;Gsk3a
GO:0000785	black	chromatin	CC	0.0515695	446	2.54259	Ccnd2;Dvl3;Kat2a;Mbd3;Rara;Rarg;Dpf2;Ncor2;Tcf3;Wbp2;Sirt6;Brd4;Lrwd1;Mau2;Pelp1;Ipo4;Ehmt2;Kdm4b;Tnrc18;Ino80e;Rnf40;Bahcc1;Cbx6;Actb;Aldoa;Ar;Phox2a;Bmi1;Capn2;Ctnnb1;Runx2;Runx3;Cbx1;Cbx2;Cbx3;Cbx5;Cdk4;Cdkn2a;Cebpb;Cenpa;Cenpc1;Chek1;Clock;Plk3;Creb1;Crebbp;Csnk2a1;Smc3;Daxx;Ddx6;Dffa;Dffb;Dnmt1;Dnmt3a;Dnmt3b;E2f1;Phc1;Eed;Ell;Enc1;Esr1;Smarcad1;Ezh2;Fancc;Foxh1;Fer;Gabpa;Gata3;Gata4;Hist1h1d…	23	Ccnd2;Dvl3;Kat2a;Mbd3;Rara;Rarg;Dpf2;Ncor2;Tcf3;Wbp2;Sirt6;Brd4;Lrwd1;Mau2;Pelp1;Ipo4;Ehmt2;Kdm4b;Tnrc18;Ino80e;Rnf40;Bahcc1;Cbx6
GO:0001191	black	transcriptional repressor activity, RNA polymerase II transcription factor binding	MF	0.0821918	73	2.53044	Ctbp1;Atn1;Notch1;Wbp2;Med12;Mkl1;Ahrr;Arntl;Cited1;Clock;Cys1;Creb1;Crebbp;Foxh1;Hdgf;Hipk2;Hyal2;Isl1;Klf4;Lmo2;Mef2a;Cited2;Myt1l;Neurod1;Nfe2l1;Nfib;Pou1f1;Prrx1;Pou3f1;Ppara;Uri1;Nr1h4;Sin3a;Sin3b;Smarca4;Sox10;Sox11;Sox12;Sox4;Bhlhe40;T;Tbx15;Tbx6;Trim28;Tle1;Uxt;Tcerg1;Heyl;Cited4;Spen;Sall1;Elp2;Wwp2;Mina;Smarca2;Rere;Mlip;Med6;Bhlhe41;Wwox;Zfp451;Psip1;Ankrd1;Myocd;Rbbp8;Mkl2;Phf12;Jade1…	6	Ctbp1;Atn1;Notch1;Wbp2;Med12;Mkl1
GO:0006476	black	protein deacetylation	BP	0.0821918	73	2.53044	Ctbp1;Ncor2;Srebf1;Sirt6;Tada3;Prkd2;Bcl6;Dyrk1a;Elk4;Smarcad1;Lpin1;Fnta;Hdac2;Hdac3;Hdac5;Hdac6;Ndst1;Msl3;Per1;Phb;Prkd1;Pml;Rest;Ncor1;Foxp3;Sin3a;Sin3b;Tbl1x;Tcf21;Morf4l1;Tgfb1;Trp53;Vegfa;Nek3;Mapk8;Brms1l;Rbm14;Morf4l2;Ripk3;Sirt2;Sirt3;Nacc2;Pink1;Znhit1;Hdac8;Prdm5;Nipbl;Sfpq;Suds3;Msl3l2;Hopx;Sirt4;Hdac9;BC004004;Tbl1xr1;Jdp2;Trps1;Sirt1;Brms1;Spred1;Spred2;Baz2a;Hdac10;Hdac4;Sirt7;Kdm…	6	Ctbp1;Ncor2;Srebf1;Sirt6;Tada3;Prkd2
GO:0004674	black	protein serine/threonine kinase activity	MF	0.0520095	423	2.52732	Mark2;Limk1;Prkaca;Stk11;Tesk1;Map2k2;Mapk3;Mink1;Tnk2;Rps6ka4;Rps6kb2;Snx15;Pak4;Prkd2;Csnk1d;Cdk9;Cdc42bpb;Mark4;Cdk10;Pkn1;Brsk1;Gsk3a;Aatk;Acvr1;Acvr1b;Acvr2a;Acvr2b;Acvrl1;Akt1;Akt2;Speg;Araf;Atm;Bckdk;Bmpr1a;Bmpr1b;Bmpr2;Bub1;Bub1b;Cab39;Camk2a;Camk2b;Camk2g;Camk4;Cask;Ccnd3;Ccnk;Cdk1;Cdk11b;Cdc7;Cdk2;Cdk4;Cdk5;Cdk5r1;Cdk6;Cdk7;Chek1;Chuk;Cit;Clk1;Clk2;Clk4;Plk3;Csnk2a1;Csnk2a2;Dapk2;Dapk3;…	22	Mark2;Limk1;Prkaca;Stk11;Tesk1;Map2k2;Mapk3;Mink1;Tnk2;Rps6ka4;Rps6kb2;Snx15;Pak4;Prkd2;Csnk1d;Cdk9;Cdc42bpb;Mark4;Cdk10;Pkn1;Brsk1;Gsk3a
GO:0008016	black	regulation of heart contraction	BP	0.0692308	130	2.52639	Cacna1c;Gaa;Hcn2;Kcnh2;Slc9a1;Srebf1;Thra;Sptbn4;Gsk3a;Chrna7;Ada;Adm;Adora1;Adra1b;Adra1a;Adrb1;Adrb2;Agrn;Agt;Atp1a1;Atp1b1;Atp2a2;Cacna1b;Cacna1d;Cacna1e;Cacna1g;Calca;Casq2;Cav1;Chga;Crhr2;Cxadr;Dmpk;Dmd;Drd2;Dsc2;Dsg2;Edn1;Edn2;Edn3;Epas1;Ctgf;Fkbp1b;Gata4;Gja1;Gja5;Glp1r;Gnao1;Hbegf;Hey2;Hrc;Il2;Jak2;Jup;Kcna5;Kcnj2;Kcnq1;Smad7;Mdm2;Mdm4;Mef2a;Mybpc3;Myl4;Nos1;Nos3;P2rx4;Pde4b;Pik3r1;Prkca;…	9	Cacna1c;Gaa;Hcn2;Kcnh2;Slc9a1;Srebf1;Thra;Sptbn4;Gsk3a
GO:0043198	black	dendritic shaft	CC	0.0892857	56	2.52206	Cacna1c;Hcn2;Gabbr1;Slc12a5;Zmynd8;Asic1;Chrna7;Cacna1b;Ctnnb1;Cnih2;Drd1;Fmr1;Lpar1;Gria2;Hcn1;Hspa8;Htr2a;Ilk;Arhgef2;Map2;Nsf;Ntsr1;Ntsr2;Prkar2b;Psen1;Exoc4;Sez6;Slc1a2;Slc8a1;Homer1;Stau2;Dlg3;Gria3;Dbn1;Gsk3b;Cript;Kirrel3;Gipc1;Whrn;Gper1;Grm7;Adrbk1;Kirrel;Inpp5j;Nlgn1;Flna;Lzts1;Nlgn2;Akap5;Syngap1;Grip2;Grm4;Prex1;Jph4;Adrbk2;Syndig1	5	Cacna1c;Hcn2;Gabbr1;Slc12a5;Zmynd8
GO:0050803	black	regulation of synapse structure or activity	BP	0.0585774	239	2.47942	Adnp;Cux2;Eif4ebp2;Psen2;Rara;Jph3;Shank3;Pvrl1;Clstn1;Ppfia3;Anapc2;Slc8a2;Zmynd8;Crtc1;Asic2;Chrnb2;Adora1;Adora2a;Adrb1;Agrn;Agt;Apoe;App;Arf1;Atp2b2;Bdnf;Calb1;Camk2a;Camk2b;Ctnna2;Cbln1;Cbln2;Cd38;Cdc42;Cdh2;Cdk5;Cpeb1;Cplx2;Creb1;Crhr1;Crhr2;Ncan;Cx3cr1;Dbi;Dlg4;Dmpk;Drd1;Drd2;Eef2k;Efna5;Egr1;Epha7;Ephb2;Ephb3;Ptk2;Fgf14;Gfap;Grik2;Grin1;Grin2a;Grin2b;Nr3c1;Htt;Hnrnpk;Hras;Hrh1;Hrh2;Htr7;I…	14	Adnp;Cux2;Eif4ebp2;Psen2;Rara;Jph3;Shank3;Pvrl1;Clstn1;Ppfia3;Anapc2;Slc8a2;Zmynd8;Crtc1
GO:0051427	black	hormone receptor binding	MF	0.0681818	132	2.47608	Rarg;Ncor2;Med24;Tyk2;Med12;Med25;Med16;Ipo13;Pkn1;Adcyap1;Parp1;Ar;Calr;Ctnnb1;Cebpb;Cry1;Cry2;Ctbp2;Daxx;Ddx5;Dnmt1;Foxh1;Fkbp4;Flt3;Fyn;Gnao1;Gnas;Grm1;Trip12;Hsd17b10;Hif1a;Hmga1;Nr4a1;Hr;Prmt2;Isl1;Jak1;Jak2;Lef1;Pias2;Ncoa1;Ncoa2;Ncoa3;Nr4a3;Nppb;Nppc;Nsd1;Nup62;Nr4a2;Pcna;Padi2;Pik3r1;Prkcb;Med1;Ppard;Pparg;Ppargc1a;Psmc3ip;Psmc5;Pthlh;Ptpn11;Rnf4;Rxra;Rxrb;Uimc1;Ncor1;Nr1h4;Smarca4;Src;St…	9	Rarg;Ncor2;Med24;Tyk2;Med12;Med25;Med16;Ipo13;Pkn1
GO:0060560	black	developmental growth involved in morphogenesis	BP	0.0599078	217	2.47484	Adnp;Dnm2;Limk1;Nkx6-1;Notch1;Rarg;Stk11;Sirt6;Med12;Smurf1;Anapc2;Plxnb1;Megf8;Aatk;Abl1;Ahr;Apoe;App;Areg;Rnd2;Bdnf;Bmp4;Bmpr2;Cdh4;Cdk5;Cdk5r1;Ccr5;Cobl;Cpne6;Crabp2;Dpysl2;Csf1;Cttn;Dclk1;Dcx;Dscam;Dvl1;S1pr1;Efna5;Epha7;Esr1;Bcl11a;Fgf1;Fgf13;Fgfr2;Fmn1;Fn1;Fxn;Gal;Hdac6;Mst1;Hnrnpk;Ifrd1;Ilk;Impact;Itgb1;L1cam;Lamb2;Lhx1;Lrp6;Mesp1;Map1b;Mapt;Ndn;Ngf;Nin;Nrp1;Nrp2;Ntn1;Ntrk3;Omg;Pafah1b1;Pr…	13	Adnp;Dnm2;Limk1;Nkx6-1;Notch1;Rarg;Stk11;Sirt6;Med12;Smurf1;Anapc2;Plxnb1;Megf8
GO:0060589	black	nucleoside-triphosphatase regulator activity	MF	0.0572519	262	2.47298	Arhgef1;Nprl3;Sipa1;Tsc2;Arhgap23;Tbc1d13;Sipa1l3;Tbc1d9b;Sgsm3;Rap1gap;Agap3;Git1;Llgl2;Arhgap33;Tbc1d2;Agrn;Arhgap5;Arhgap6;Arhgdib;Atp1b1;Atp1b2;Atp1b3;Atpif1;Axin1;Axin2;Arhgap31;Chm;Chml;Asap1;Ect2;Evi5;Srgap2;Gdi1;Gdi2;Arhgdig;Gnaq;Gnb5;Rhpn1;Agfg1;Htr2b;Itgb1bp1;Jun;Llgl1;Grpel1;Grpel2;Myo9b;Nf1;Pcp2;Pde6d;Pfn1;Pfn2;Plcb1;Pln;Rab3a;Rab4a;Rab6a;Ranbp1;Rangap1;Rasa3;Rasal1;Ralgds;Rgs16;Rgs2;…	15	Arhgef1;Nprl3;Sipa1;Tsc2;Arhgap23;Tbc1d13;Sipa1l3;Tbc1d9b;Sgsm3;Rap1gap;Agap3;Git1;Llgl2;Arhgap33;Tbc1d2
GO:0046474	black	glycerophospholipid biosynthetic process	BP	0.0752688	93	2.47146	Pigq;Inppl1;Agpat1;Pigo;Pigt;Pigs;Pgap3;Apoa1;Apoa2;Atm;Chkb;Chka;Pcyt1a;Dpm1;Dpm2;Fabp3;Fgf2;Fgf7;Gpaa1;Htr2a;Htr2b;Ajuba;Fabp5;Lcat;Pdgfa;Pdgfb;Pemt;Piga;Pigf;Pik3ca;Pik3r1;Pip5k1c;Pip5k1b;Pip5k1a;Pla2g5;Pld1;Pld2;Ptdss1;Plscr1;Sh3yl1;Slc27a1;Ptdss2;Pign;Ept1;Pik3cg;Cdipt;Pla2g6;Sh3glb1;Impa1;Pigb;Pigp;Alg5;Pigyl;Pyurf;Ptpmt1;Crls1;Taz;Pigc;Far1;Abhd5;Agpat2;Pigm;Dpm3;Pigw;Pigx;Acsl3;Cds1;Pik3c…	7	Pigq;Inppl1;Agpat1;Pigo;Pigt;Pigs;Pgap3
GO:0031929	black	TOR signaling	BP	0.08	75	2.45524	Eif4ebp2;Gna12;Nprl3;Stk11;Tsc2;Gsk3a;Araf;Arntl;Atm;Slc7a1;Slc7a3;Eif4ebp1;Epm2a;Gas6;Gata3;Hdac3;Hif1a;Kdr;Mtm1;Pdcd6;Reln;Rheb;Ros1;Rps6;Ubr1;Xbp1;Rragc;Nprl2;Lamtor3;Mlst8;Mtor;Tsc1;Lamtor4;Tnfaip8l1;Lamtor1;Golph3;Tbc1d7;Akt1s1;Rraga;Lamtor5;Pih1d1;Rhebl1;Tmem127;Fbxo9;Telo2;Fam83d;Seh1l;Prr5l;Rps6kb1;Larp1;Rptor;Ddit4;Tti1;Rictor;Lamtor2;Sirt1;Deptor;Sh3bp4;Prkaa1;Prkaa2;Ccdc88a;Sec13;Fnip1…	6	Eif4ebp2;Gna12;Nprl3;Stk11;Tsc2;Gsk3a
GO:0048738	black	cardiac muscle tissue development	BP	0.0628571	175	2.44602	Kat2a;Hspg2;Nprl3;Notch1;Rara;Slc9a1;Zfpm1;Sirt6;Ddx39b;Ube4b;Gsk3a;Acadm;Actc1;Actn2;Acvr1;Adrb1;Angpt1;Agt;Slc25a4;Speg;Atg5;Bmp2;Bmp4;Cacybp;Casp8;Ctnnb1;Cdk1;Cdc42;Col11a1;Col14a1;Creb1;Cxadr;Dsg2;S1pr1;Efnb2;Epor;Erbb3;Erbb4;Fadd;Foxh1;Fgf1;Fgf2;Fgf9;Fgfr1;Fgfr2;Fkbp1a;Foxc2;G6pdx;Gata4;Gata6;Gja1;Gja5;Gjc1;Nr3c1;Hdac2;Hdac3;Hey1;Hey2;Id2;Isl1;Itgb1;Kcnk2;Lmna;Lrp6;Ly6e;Smad1;Smad7;Mef2a;Mef…	11	Kat2a;Hspg2;Nprl3;Notch1;Rara;Slc9a1;Zfpm1;Sirt6;Ddx39b;Ube4b;Gsk3a
GO:0030111	black	regulation of Wnt signaling pathway	BP	0.0593607	219	2.43933	Dvl2;Lrp1;Lrp5;Notch1;Stk11;Hnf1a;Thra;Tle2;Tsc2;Apc2;Med12;Fuz;Csnk1d;Abl1;Abl2;Macf1;Apc;Xiap;Arntl;Atp6v0c;Axin1;Axin2;Bmp2;Btrc;Aspm;Ctnnd1;Cav1;Ccnd1;Cdh1;Cdh2;Col1a1;Csnk2a1;Dab2;Dapk3;Ddit3;Dvl1;Eda;Egr1;Emd;Lgr5;Fgf2;Fgf9;Fgfr2;Fgfr3;Foxl1;Folr1;Fzd1;Fzd5;Fzd6;Gli1;Gli3;Gpc3;Grb10;Aes;Hdac2;Hhex;Hic1;Hmga2;Ilk;Invs;Isl1;Itga3;Mdfic;Lats1;Lef1;Lrp6;Smad3;Mbd2;Mdfi;Mesp1;Usp34;Nfkb1;Nlk;Ctn…	13	Dvl2;Lrp1;Lrp5;Notch1;Stk11;Hnf1a;Thra;Tle2;Tsc2;Apc2;Med12;Fuz;Csnk1d
GO:0060079	black	excitatory postsynaptic potential	BP	0.0862069	58	2.4313	Cux2;Grik5;Shank3;Mapk8ip2;Zmynd8;Adora1;Adora2a;Adrb2;Bdnf;Cdk5;Dlg4;Dmpk;Dvl1;S1pr2;Grid2;Grik2;Grin1;Grin2a;Grin2b;Grin2c;Mecp2;Mef2c;Met;Ngfr;Nrxn1;Oprm1;P2rx4;Prkcz;Ppp3ca;Pten;Ptk2b;Reln;Atxn1;Sez6;Snca;Stx1a;Park2;Npff;Stx1b;Dbn1;Gsk3b;Ghrl;Slc29a1;Lrrk2;Slc17a7;Mtmr2;Celf4;Chrna3;Rims1;Rims2;Nlgn1;Eif4a3;Nlgn2;Rab3gap1;Ppp1r9a;Shank1;Nlgn3;Dgki	5	Cux2;Grik5;Shank3;Mapk8ip2;Zmynd8
GO:1902495	black	transmembrane transporter complex	CC	0.0578512	242	2.4295	Cacna1c;Cacnb1;Cacnb3;Grik5;Grin2d;Hspa2;Kcnh2;Slc9a1;Abcc8;Uqcrc1;Ttyh3;Ppp2r4;Ttyh2;Lrrc8a;Chrna1;Chrna4;Chrna7;Chrnb1;Chrnb2;Atp1a1;Atp1b1;Atp1b2;Atp1b3;Atp2a2;Cacna1a;Cacna1b;Cacna1d;Cacna1e;Cacna2d1;Cacna2d3;Cacnb2;Cacnb4;Cacng1;Cacng2;Calm1;Calm2;Calm3;Cftr;Clcn1;Clcn2;Cnga1;Cnga2;Cnga3;Cnih2;Cttn;Dlg1;Dlg4;Dpp6;Eps8;Fkbp1b;Gabra3;Gabra4;Gabrb1;Gabrb3;Gabrd;Gabrg1;Gabrg2;Gabrg3;Gabrr1;Gabrr…	14	Cacna1c;Cacnb1;Cacnb3;Grik5;Grin2d;Hspa2;Kcnh2;Slc9a1;Abcc8;Uqcrc1;Ttyh3;Ppp2r4;Ttyh2;Lrrc8a
GO:0001076	black	transcription factor activity, RNA polymerase II transcription factor binding	MF	0.0701754	114	2.4231	Ctbp1;Atn1;Notch1;Wbp2;Med24;Med12;Med26;Mkl1;Ahrr;Arntl;Cited1;Clock;Cys1;Creb1;Crebbp;Foxh1;Gata4;Nr3c1;Hdgf;Hif1a;Hipk2;Hyal2;Isl1;Klf4;Lhx3;Lif;Lmo2;Smad4;Mef2a;Cited2;Myt1l;Ncoa3;Neurod1;Nfe2l1;Nfib;Pou1f1;Prrx1;Pou3f1;Ppara;Med1;Ppargc1a;Uri1;Nr1h4;Sin3a;Sin3b;Smarca4;Sox10;Sox11;Sox12;Sox4;Srf;Bhlhe40;Med22;T;Tbx15;Tbx6;Tcf4;Tdg;Trim28;Tle1;Uxt;Yap1;Med14;Trp53bp1;Med10;Tcerg1;Heyl;Cited4;…	8	Ctbp1;Atn1;Notch1;Wbp2;Med24;Med12;Med26;Mkl1
GO:0003002	black	regionalization	BP	0.056391	266	2.41041	Dvl2;Kat2a;Adgrg1;Lrp5;Nkx2-2;Nkx6-1;Notch1;Prkaca;Psen2;Rarg;Med12;Fuz;Megf8;Acd;Tctn1;Abi1;Acvr1;Acvr2a;Acvr2b;Alx4;Apc;Nr2f2;Ar;Arc;Atm;Axin1;Axin2;Bmi1;Bmp2;Bmp4;Bmpr1a;Bmpr1b;Bmpr2;Btg2;Ctnnb1;Cdx2;Cdx4;Celsr1;Cer1;Chrd;Crkl;Cyp26a1;Ddit3;Dll1;Dll3;Dlx1;Lefty1;Edn1;Egf;Egr2;Nr2f1;Evx1;Foxh1;Fgf1;Fgf2;Fgfr1;Fgfr2;Fgfr4;Fkbp8;Foxc2;Fzd5;Gas1;Gata4;Gdf11;Gdf3;Gdnf;Gli1;Gli2;Gli3;Gpc3;Nkx6-2;Htt…	15	Dvl2;Kat2a;Adgrg1;Lrp5;Nkx2-2;Nkx6-1;Notch1;Prkaca;Psen2;Rarg;Med12;Fuz;Megf8;Acd;Tctn1
GO:0007030	black	Golgi organization	BP	0.0736842	95	2.40866	Dnm2;Cog1;Map2k2;Mapk3;Golga2;Csnk1d;Myo18a;Cdk1;Cdc42;Cit;Plk3;Htt;Kifc3;Bhlha15;Prkd1;Rab1a;Rab33b;Surf4;Vrk1;Ywhaz;Map2k1;Mapk1;Zw10;Golga5;Prmt5;Vamp4;Vti1a;Arhgef7;Atp8b2;Atp8b1;Uso1;Atl2;Tmed2;Stx5a;Pdcd10;Stx6;Rab2a;Stk25;Syne1;Blzf1;Cul7;Golph3;Lrrk2;Tbc1d20;Cltc;Atp8b3;Tmed9;l7Rn6;Stx17;Ubxn2b;Tmed10;Dym;Plekhm2;Rab43;Gorasp2;Gcc2;Lman1;Bag5;Vcpip1;Stx18;Arhgap21;Optn;Tmed5;Tjap1;Gorasp1…	7	Dnm2;Cog1;Map2k2;Mapk3;Golga2;Csnk1d;Myo18a
GO:0035257	black	nuclear hormone receptor binding	MF	0.0695652	115	2.39589	Rarg;Ncor2;Med24;Med12;Med25;Med16;Ipo13;Pkn1;Parp1;Ar;Calr;Ctnnb1;Cebpb;Cry1;Cry2;Ctbp2;Daxx;Ddx5;Dnmt1;Foxh1;Fkbp4;Flt3;Grm1;Trip12;Hsd17b10;Hif1a;Hmga1;Nr4a1;Hr;Prmt2;Isl1;Lef1;Pias2;Ncoa1;Ncoa2;Ncoa3;Nr4a3;Nsd1;Nup62;Nr4a2;Pcna;Padi2;Pik3r1;Prkcb;Med1;Ppard;Pparg;Ppargc1a;Psmc3ip;Rnf4;Rxra;Rxrb;Uimc1;Ncor1;Nr1h4;Smarca4;Src;Stat3;Stat5b;Tcf21;Tcf7l2;Tgfb1i1;Nr1h3;Nr1h2;Vdr;Ywhah;Ets2;Nr0b2;Ta…	8	Rarg;Ncor2;Med24;Med12;Med25;Med16;Ipo13;Pkn1
GO:0051100	black	negative regulation of binding	BP	0.0695652	115	2.39589	Adnp;Psen2;Zfpm1;Mapk3;Pex14;Golga2;Rap1gap;Wfikkn1;Ace;Adam15;Adrb2;B2m;Bax;Anxa2;Cav1;Cdkn2a;Ckmt1;Dab2;Ddit3;Dvl1;E2f1;Gata1;Aes;Hand2;Hdac2;Hes1;Hey1;Hey2;Hfe;Hmox1;Hnrnpk;Hspa4;Id1;Id2;Ifit2;Il10;Isl1;Itga4;Itgb1bp1;Jak2;Jun;Lef1;Lrpap1;Mdfi;Msx1;Myc;Nek2;Nfib;P2ry1;Pdgfb;Pim2;Ppara;Ppp3ca;Ptprf;Pex19;Rock1;Ruvbl2;Sin3a;Slpi;Sorl1;Sox11;Aurkb;Aurka;Tdg;Tnks;Plscr1;Sumo1;Zfp90;Pin1;Mapk8;Csnk…	8	Adnp;Psen2;Zfpm1;Mapk3;Pex14;Golga2;Rap1gap;Wfikkn1
GO:0001708	black	cell fate specification	BP	0.0847458	59	2.38736	Nkx2-2;Nkx6-1;Notch1;Psen2;Apc2;Apc;Ar;Bmpr1a;Ctnnb1;Dll1;Evx1;Eya1;Fgf2;Fgfr1;Fkbp8;Fzd7;Gfi1;Gli2;Gli3;Nkx6-2;Mnx1;Foxa1;Foxa2;Ihh;Isl1;Itgb1;Lhx3;Lmo4;Ascl1;Mesp1;Ntrk3;Pax6;Pou1f1;Pou4f1;Psen1;Ptch1;Ptch2;Rbpj;Sfrp2;Shh;Six2;Sox17;Sox18;Sox6;Sox9;Tbx1;Tbx6;Hnf1b;Tead4;Tenm4;Sufu;Cdon;Ppdpf;Dusp6;Nanog;Dmrta2;Fev;Smo;Prdm14	5	Nkx2-2;Nkx6-1;Notch1;Psen2;Apc2
GO:0032947	black	protein complex scaffold	MF	0.0847458	59	2.38736	Hcn2;Mapk8ip1;Map2k2;Mapk8ip3;Shank3;Akap1;Axin1;Capn3;Cav1;Cav2;Dlg1;Magi1;Itsn1;Ksr1;Sept2;Nup62;Pxn;Homer1;Homer2;Slc9a3r1;Magi2;Rgs14;Wwc2;Lamtor3;Slc9a3r2;Chchd3;Lamtor4;Iscu;Lamtor1;Lrrk2;Pkp2;Dusp19;Lamtor5;Sash1;Spag9;Telo2;Grip1;Akap13;Mpp7;Akap12;Lamtor2;Smarcd1;Magi3;Ldlrap1;Akap9;Wwc1;Arrb2;Akap11;BC029214;Klhl17;Tnrc6a;Cnot1;Akap6;Dlgap3;Shank1;Disc1;Gphn;Ksr2;Akap7	5	Hcn2;Mapk8ip1;Map2k2;Mapk8ip3;Shank3
GO:0035282	black	segmentation	BP	0.0779221	77	2.38244	Dvl2;Kat2a;Notch1;Psen2;Med12;Acd;Abi1;Atm;Axin1;Axin2;Bmp4;Bmpr1a;Cdx2;Dll1;Dll3;Egr2;Foxc2;Fzd5;Gdf3;Foxf1;Foxa2;Hoxa2;Mafb;Lef1;Lfng;Lhx1;Lrp6;Smad3;Smad4;Meox1;Meox2;Mesp2;Foxc1;Mtf2;Nrp1;Nrp2;Pcdh8;Pcsk6;Prkdc;Psen1;Rbpj;Sfrp2;Sema3a;Sema3f;Sfrp1;T;Tbx3;Tbx6;Tcf15;Tcf7l1;Trp53;Kdm6a;Wnt5a;Wt1;Zeb2;Ror2;Nckap1;Tmed2;Rgs19;Xrcc2;Rgs20;Nrarp;Ifitm1;Mllt3;Hes7;Pofut1;Pld6;Tdrd5;Nle1;Poglut1;Mib1…	6	Dvl2;Kat2a;Notch1;Psen2;Med12;Acd
GO:0018022	black	peptidyl-lysine methylation	BP	0.0729167	96	2.37785	Paxip1;Pygo2;Ehmt2;Kdm4b;Auts2;Zfp335;Kmt2d;Brca1;Ctnnb1;Dnmt1;Dnmt3b;Eed;Ezh1;Ezh2;Gata3;Gcg;Gfi1;Hist1h1d;Hdac2;Jarid2;Smad4;Men1;Mtf2;Myb;Nsd1;Smarcb1;Supt6;Suv39h1;Phf1;Ctr9;Ash2l;Nelfa;H2afy;Hist1h1c;Hist1h1e;Suz12;Setd3;Ncoa6;Suv39h2;Setd6;Dpy30;Wdr61;Snw1;Mettl21a;Setd8;Pih1d1;Kmt2e;Smyd3;Eef2kmt;Prdm5;Bcor;Setd7;Iws1;Phf19;Cxxc1;Setmar;Asxl2;Kmt2b;Rtf1;Kdm4c;Wdr82;Ehmt1;Setdb1;Sirt1;Arid4…	7	Paxip1;Pygo2;Ehmt2;Kdm4b;Auts2;Zfp335;Kmt2d
GO:0031227	black	intrinsic component of endoplasmic reticulum membrane	CC	0.0729167	96	2.37785	Atf6b;Creb3l1;G6pc3;Sppl2b;Pigt;Pigs;Pgap3;Aup1;Calr;Cln3;Creb3;Cyp2e1;Dhcr7;Dpm2;Ext1;Fkbp8;G6pc2;Slc37a4;Bscl2;Gpaa1;Pdia3;Hspa5;H13;Lrmp;Emc8;Pkd2;Rce1;Scd1;Srebf2;Stim1;Tap1;Tap2;Tapbp;Tex261;Wfs1;Xbp1;Amfr;Esyt1;Slc27a2;Slc27a5;Ero1l;Esyt2;Porcn;Abcb9;Dolpp1;Asph;Emc6;Emc3;Acer3;Fam134b;Sppl2a;Emc2;Samd8;Dgat2;Derl1;Saraf;Emc4;Dpm3;Rtn4;Fitm1;Spcs1;Emc10;Derl3;Ankle2;Rnf180;Insig2;Emc7;Tm7sf…	7	Atf6b;Creb3l1;G6pc3;Sppl2b;Pigt;Pigs;Pgap3
GO:0051090	black	regulation of sequence-specific DNA binding transcription factor activity	BP	0.0539683	315	2.37641	Dvl2;Lrp5;Nkx2-2;Tcf3;Thra;Traf3;Rbck1;Mapk3;Pex14;Pias4;Ube2v1;Crtc3;Trappc9;Trim8;Prkd2;Ppp2r5b;Crtc1;Adam8;Ager;Akt1;Amh;Anxa3;Anxa4;Prdx3;Ar;Atf2;Neurog2;Neurog3;Phb2;Bcl10;Bdnf;Bex2;Cacna1d;Camk2a;Capn3;Cat;Ctnnb1;Cd84;Cdkn2a;Cebpg;Cflar;Clock;Clu;Cys1;Crebbp;Crhr2;Cyp1b1;Ddit3;Epha5;Esr1;Ezh2;Fanca;Foxh1;Fer;Foxs1;Fosl1;Fzd1;Fzd4;Fzd6;Gas6;Mtpn;Gfi1;Cmklr1;Hand2;Hck;Hdac2;Hdac3;Hdac5;Foxj1;…	17	Dvl2;Lrp5;Nkx2-2;Tcf3;Thra;Traf3;Rbck1;Mapk3;Pex14;Pias4;Ube2v1;Crtc3;Trappc9;Trim8;Prkd2;Ppp2r5b;Crtc1
GO:0031300	black	intrinsic component of organelle membrane	CC	0.058296	223	2.36944	Atf6b;St3gal3;Creb3l1;G6pc3;Sppl2b;Pex26;Pigt;Mfn2;Zdhhc9;Pqlc2;Rhot2;Pigs;Pgap3;Abcd1;Aup1;Bak1;Bid;Bnip3;Calr;Cln3;Cpt1a;Creb3;Cux1;Cyp2e1;Dhcr7;Dmpk;Dpm2;Ext1;Fkbp8;G6pc2;Slc37a4;B4galnt1;Gdap1;Bscl2;Gpaa1;Pdia3;Hspa5;H13;Itm2b;Lfng;Lrmp;Mfng;Sypl2;Emc8;P2rx1;P2rx4;P2rx7;P2rx6;Pcsk7;Pex11a;Pex11b;Pex16;Pkd2;Sypl;Ppox;Pex2;Rce1;Rdh16;Rfng;Scd1;St6gal1;St3gal1;St3gal4;St3gal2;St6galnac2;St8sia1;…	13	Atf6b;St3gal3;Creb3l1;G6pc3;Sppl2b;Pex26;Pigt;Mfn2;Zdhhc9;Pqlc2;Rhot2;Pigs;Pgap3
GO:1990351	black	transporter complex	CC	0.0569106	246	2.36402	Cacna1c;Cacnb1;Cacnb3;Grik5;Grin2d;Hspa2;Kcnh2;Slc9a1;Abcc8;Uqcrc1;Ttyh3;Ppp2r4;Ttyh2;Lrrc8a;Chrna1;Chrna4;Chrna7;Chrnb1;Chrnb2;Atp1a1;Atp1b1;Atp1b2;Atp1b3;Atp2a2;Cacna1a;Cacna1b;Cacna1d;Cacna1e;Cacna2d1;Cacna2d3;Cacnb2;Cacnb4;Cacng1;Cacng2;Calm1;Calm2;Calm3;Cftr;Clcn1;Clcn2;Cnga1;Cnga2;Cnga3;Cnih2;Cttn;Dlg1;Dlg4;Dpp6;Eps8;Fkbp1b;Timm10b;Gabra3;Gabra4;Gabrb1;Gabrb3;Gabrd;Gabrg1;Gabrg2;Gabrg3;Gabr…	14	Cacna1c;Cacnb1;Cacnb3;Grik5;Grin2d;Hspa2;Kcnh2;Slc9a1;Abcc8;Uqcrc1;Ttyh3;Ppp2r4;Ttyh2;Lrrc8a
GO:0031330	black	negative regulation of cellular catabolic process	BP	0.0632911	158	2.35464	Furin;Psen2;Sirt6;Usp19;Dhx34;Xrcc3;Ubqln4;Golga2;Ehmt2;Bag6;Actn3;Adra1b;Akt1;Apc;Apoc3;Atm;Bcl2;Bub1;Bub1b;Tspo;Anxa2;Cbfa2t3;Cdkn2a;Cln3;Cnr1;Csnk2a1;Csnk2a2;Cst3;Dbi;Dffa;Fbp1;Fhit;Gata4;Gpld1;Hfe;Hmox1;Hp;Htr2b;Ier3;Il10;Ins2;Lepr;Mad1l1;Mt3;Mtm1;Npc1;Pabpc1;Prkcg;Plk1;Pml;Ppargc1a;Ctsa;Psen1;Ptpn22;Rgn;Shh;Stil;Smarcc1;Snca;Stat3;Terf1;Timp1;Timp2;Timp3;Tnfaip3;Tob1;Trp53;Zfp207;Sufu;Tlk2;Z…	10	Furin;Psen2;Sirt6;Usp19;Dhx34;Xrcc3;Ubqln4;Golga2;Ehmt2;Bag6
GO:0032412	black	regulation of ion transmembrane transporter activity	BP	0.0632911	158	2.35464	Cacnb1;Cacnb3;Dnm2;Hap1;Hspa2;Slc9a1;Mink1;Jph3;Shank3;Mapk8ip2;Asic2;Chrna4;Actn2;Adrb1;Ager;Agrn;Ank3;Arc;Atp1b1;Atp1b2;Atp1b3;Fxyd2;Bmp4;Cacna1d;Cacnb2;Cacnb4;Cacng2;Casq2;Cav1;Cftr;Cnih2;Crhbp;Crhr1;Ctss;Dlg4;Dmd;Drd2;Drd3;Stom;Fgf12;Fgf14;Fhl1;Fkbp1a;Fkbp1b;Gal;Galr2;Gnb5;Gsto1;Hcn1;Htt;Hk1;Hrc;Ikbkb;Kcnab1;Kcnj11;Kcnq1;Fxyd3;Mef2c;Mmp9;Myo5a;Ntsr1;Fxyd5;Oprl1;Oprm1;Pde4b;Pkd2;Plcb1;Plcg1;Pl…	10	Cacnb1;Cacnb3;Dnm2;Hap1;Hspa2;Slc9a1;Mink1;Jph3;Shank3;Mapk8ip2
GO:0051099	black	positive regulation of binding	BP	0.0656934	137	2.35415	Kat2a;Hnrnpl;Rara;Brd4;Pygo2;Med25;Mapre3;Cdk9;Acd;Abl1;Abl2;Ace;Add1;Add2;Parp1;Agrn;B2m;Bmp2;Bmp4;Anxa2;Calm1;Cav1;Cdk5;Csf3;Ctbp2;Mapre1;Ebf2;Egf;Eif2ak3;Eno1;Ephb6;Ercc2;Fkbp1a;Flot1;Aktip;Gata3;Gcg;Hand2;Hes1;Hfe;Hipk1;Hipk2;Hipk3;Hsf1;Hsp90ab1;Hspa4;Igf1;Irf4;Isl1;Itga2;Jak2;Klf4;Lfng;Lgals9;Mbd2;Mef2c;Men1;Mfng;Mmp9;Myc;Neurod1;Ngf;Nme1;Kat2b;Pdx1;Pkd1;Plaur;Ran;Rfng;S100a10;Ski;Smarca4;Pl…	9	Kat2a;Hnrnpl;Rara;Brd4;Pygo2;Med25;Mapre3;Cdk9;Acd
GO:1900006	black	positive regulation of dendrite development	BP	0.0769231	78	2.3469	Cux2;Numbl;Shank3;Anapc2;Zmynd8;Crtc1;Ache;Apoe;Arf1;Bmp5;Bmp7;Camk2b;Cobl;Crp;Cux1;Eef2k;Eif4g2;Epha4;Ezh2;Lpar1;Nr3c1;Grn;Hnrnpk;Elavl4;Il1rap;Il2;Ilk;Lrp8;Mapkapk5;Met;Pias2;Neurl1a;Numb;Pafah1b1;Pak3;Palm;Psen1;Ptprd;Ptprf;Ptprz1;Reln;Sez6;Sgk1;Tiam1;Vldlr;Pacsin1;Xlr4b;Stau2;Mapk6;Camk1;Caprin1;Dbn1;Mtor;Cul7;Dab2ip;Bhlhb9;Tmem106b;Actr3;Opa1;Fbxo31;Baiap2;Nlgn1;Cpeb3;Nrg1;Cdkl3;Rab21;Nlgn2;…	6	Cux2;Numbl;Shank3;Anapc2;Zmynd8;Crtc1
GO:0031647	black	regulation of protein stability	BP	0.0594059	202	2.34529	Dvl3;Kat2a;Srebf1;Tcf3;Wiz;Sirt6;Usp19;Syvn1;Tada3;Ncln;Bag6;Pex6;Apbb1;Apbb2;Apoa1;Apoa2;Atp1b1;Atp1b2;Atp1b3;Phb2;Bcl2;Bmp2;Btrc;Calr;Cct2;Cct3;Cct4;Cct5;Cct6a;Cct7;Cct8;Cd81;Cdc37;Cdc42;Cdkn2a;Clu;Creb1;Csn3;Ctsh;Dpm2;Dsc3;Dvl1;Flot2;Gapdh;Gnaq;Hcfc1;Hdac3;Hdac6;Hspa8;Hspd1;Id1;Igf1;Lamp1;Lamp2;Lss;Smad3;Smad7;Mdm2;Msx1;Commd1;Nf2;Nlk;Npm1;Pfn1;Pfn2;Phb;Pik3r1;Pim1;Pim2;Plk1;Pml;Ctsa;Ppib;Prkd…	12	Dvl3;Kat2a;Srebf1;Tcf3;Wiz;Sirt6;Usp19;Syvn1;Tada3;Ncln;Bag6;Pex6
GO:0016575	black	histone deacetylation	BP	0.0833333	60	2.34433	Ctbp1;Srebf1;Sirt6;Tada3;Prkd2;Bcl6;Elk4;Smarcad1;Lpin1;Hdac2;Hdac3;Hdac5;Hdac6;Msl3;Per1;Phb;Prkd1;Pml;Rest;Ncor1;Foxp3;Sin3a;Sin3b;Tbl1x;Tcf21;Morf4l1;Tgfb1;Trp53;Vegfa;Mapk8;Brms1l;Rbm14;Morf4l2;Sirt2;Nacc2;Pink1;Znhit1;Hdac8;Prdm5;Nipbl;Sfpq;Suds3;Msl3l2;Hopx;Hdac9;BC004004;Tbl1xr1;Jdp2;Trps1;Sirt1;Brms1;Baz2a;Hdac10;Hdac4;Sirt7;Kdm5a;Tada2a;Rcor1;Hdac11;Hdac1	5	Ctbp1;Srebf1;Sirt6;Tada3;Prkd2
GO:0048024	black	regulation of mRNA splicing, via spliceosome	BP	0.0833333	60	2.34433	Hnrnpl;Srsf4;Dazap1;Celf3;Srsf9;C1qbp;Ddx5;Dyrk1a;Srsf10;Hnrnpk;Hspa8;Uhmk1;Magoh;Npm1;Ptbp1;Rbm4;Rbmx;Rbmxl1;Rnps1;Sap18;Srsf2;Tra2b;Snrnp70;Tia1;U2af2;Zfp64;Prpf19;Rbfox3;Hnrnpa2b1;Acin1;Mbnl1;Pcbp4;Rbm8a;Wtap;Snw1;Rbm25;Srsf6;Rbm42;Srrm4;Lmntd2;Slc39a5;Malat1;Rnf219;Rbm5;Rbfox2;Tra2a;Mbnl2;Sf3b4;Jmjd6;Celf4;Rbm15b;Eif4a3;Rbm11;Srsf7;Ptbp3;Thrap3;Sfswap;Rbm10;Nsrp1;Rbfox1	5	Hnrnpl;Srsf4;Dazap1;Celf3;Srsf9
GO:0005802	black	trans-Golgi network	CC	0.0625	160	2.31161	Ap3d1;Bsn;Dnm2;Furin;Scamp2;Trappc9;March9;Fam109a;Gga3;Myo18a;Adam10;Ap1b1;Ap1g1;Ap1g2;Ap1m1;Ap1m2;Ap1s1;Ap3b1;Ap3b2;Ap3s1;Ap3s2;Ap4m1;Ap4s1;Arf1;Atp7a;Atp7b;Atp8a1;Atp9a;Bicd1;Birc6;Car4;Cdh1;Cln3;Cpd;Crhr1;Lgr5;Fnbp1;Gcnt1;Gnas;Igf2r;Kif13a;Llgl1;M6pr;Mmp24;Myo1b;Nck1;Nck2;Slc11a2;Ntsr2;Nucb1;Pam;Prkd1;Inpp5k;Rab10;Rab6a;Dennd5a;Rac1;Atxn2;Snap25;Sod3;Sorl1;Stx4a;Tgfb2;Tgfbi;Ift88;Tmem165;Tgol…	10	Ap3d1;Bsn;Dnm2;Furin;Scamp2;Trappc9;March9;Fam109a;Gga3;Myo18a
GO:0043401	black	steroid hormone mediated signaling pathway	BP	0.0647482	139	2.30683	Rara;Rarg;Thra;Med24;Med12;Med16;Safb;Ipo13;Kmt2d;Parp1;Nr2f2;Ar;Rhoa;Arntl;Phb2;Bdnf;Bmp4;Bmp7;Brca1;Calr;Nr1i3;Clock;Cry1;Cry2;Cyp7b1;Dab2;Daxx;Ddx5;Nr2f6;Nr2f1;Esr1;Foxh1;Fkbp4;Nr6a1;Nr3c1;Hmga2;Nr4a1;Foxa1;Hnf4a;Prmt2;Dnaja1;Igf1;Isl1;Jak2;Klf9;Lef1;Pias2;Ncoa2;Ncoa3;Nr4a3;Nr1i2;Ntrk2;Nr4a2;Pak1;Padi2;Per1;Pgr;Phb;Ppara;Med1;Ppard;Pparg;Ppp5c;Rora;Rorc;Rxra;Rxrb;Rxrg;Nr1h4;Sfrp1;Sgk1;Smarca4;…	9	Rara;Rarg;Thra;Med24;Med12;Med16;Safb;Ipo13;Kmt2d
GO:0007215	black	glutamate receptor signaling pathway	BP	0.0819672	61	2.30217	Grik5;Grin2d;Mink1;Shank3;Mapk8ip2;App;Arc;Cacng2;Camk2a;Cdk5r1;Cln3;Cnih2;Crhbp;Dlg4;Gnaq;Gria2;Gria4;Grik2;Grik3;Grin1;Grin2a;Grin2b;Grin2c;Grm1;Grm8;Kcnb1;Mef2c;Trpm1;Oprm1;Plcb1;Ppargc1a;Ptk2b;Rasgrf1;Rasgrf2;Reln;Sstr1;Homer1;Homer2;Homer3;Gria3;Cacng3;Cacng4;Cpeb4;Dapk1;Shisa9;Neto2;Klhl24;Cacng7;Grm3;Grm7;Cacng5;Grin3b;Grid2ip;Nlgn1;Nlgn2;Atp1a3;Grin3a;Shank1;Nlgn3;Grm4;Gsg1l	5	Grik5;Grin2d;Mink1;Shank3;Mapk8ip2
GO:1903052	black	positive regulation of proteolysis involved in cellular protein catabolic process	BP	0.0707071	99	2.28769	Psen2;Sgta;Ubqln2;Osbpl7;Smurf1;Csnk1d;Rnf40;Akt1;Atpif1;Axin1;Cbfa2t3;Clu;Plk3;Ctsc;Dab2;Dvl1;Egf;Ptk2;Gba;Gclc;Rack1;Smad7;Mdm2;Plk1;Psen1;Pten;Ptk2b;Rb1;Rgn;Sumo3;Plk2;Aurka;Sumo1;Usp5;Xbp1;Arih1;Arih2;Rfwd2;Cul3;Bcap31;Csnk1e;Rnf19a;Fbxw7;Park2;Nub1;Psmd10;Ccdc22;Ubqln1;Stub1;Socs5;Pias1;Rnf138;Gsk3b;Rnf14;Dnajb2;Herpud1;Sirt2;Anapc11;Hspbp1;Lrrk2;Socs4;Rnf125;Rchy1;Nsmce2;Ecscr;Rnf166;Dab2ip…	7	Psen2;Sgta;Ubqln2;Osbpl7;Smurf1;Csnk1d;Rnf40
GO:0031984	black	organelle subcompartment	CC	0.0570175	228	2.28405	Ap3d1;Bsn;Dnm2;Furin;Rtn2;Scamp2;Trappc9;Golga2;March9;Hid1;Fam109a;Gga3;Myo18a;Adam10;Ap1b1;Ap1g1;Ap1g2;Ap1m1;Ap1m2;Ap1s1;Ap3b1;Ap3b2;Ap3s1;Ap3s2;Ap4m1;Ap4s1;Arf1;Atp7a;Atp7b;Atp8a1;Atp9a;Bet1;Bicd1;Birc6;Car4;Casq1;Cdh1;Cit;Cln3;Plk3;Cpd;Crhr1;Lgr5;Fnbp1;Gcnt1;Ggta1;B4galt1;Gnas;H2-D1;H2-K1;H2-Q1;H2-Q10;H2-Q2;H2-Q4;H2-Q7;Ica1;Igf2r;Kpnb1;Kif13a;Llgl1;Lyz2;Lyz1;M6pr;Mmp24;Myo1b;Nck1;Nck2;Slc11a2…	13	Ap3d1;Bsn;Dnm2;Furin;Rtn2;Scamp2;Trappc9;Golga2;March9;Hid1;Fam109a;Gga3;Myo18a
GO:0050773	black	regulation of dendrite development	BP	0.0642857	140	2.28347	Cux2;Numbl;Stk11;Shank3;Anapc2;Zmynd8;Sarm1;Crtc1;Gsk3a;Ache;Chrnb2;Apoe;Arf1;Arf6;Rhoa;Neurog3;Bmp5;Bmp7;Camk2b;Cdk5;Cdk5r1;Cfl1;Cit;Cobl;Crp;Cux1;Asap1;Eef2k;Efna1;Eif4g2;Epha4;Bcl11a;Ezh2;Lpar1;Grin1;Nr3c1;Grn;Hdac2;Hnrnpk;Sdc2;Elavl4;Id1;Il1rap;Il2;Ilk;Lrp8;Mapkapk5;Mef2c;Met;Pias2;Nedd4;Neurl1a;Ngfr;Ntrk2;Numb;Pafah1b1;Pak3;Palm;Ppp3ca;Cyth2;Psen1;Pten;Ptprd;Ptprf;Ptprz1;Rab17;Reln;Robo1;Sem…	9	Cux2;Numbl;Stk11;Shank3;Anapc2;Zmynd8;Sarm1;Crtc1;Gsk3a
GO:0035239	black	tube morphogenesis	BP	0.0520231	346	2.28196	Ddr1;Dvl2;Dvl3;Kat2a;Lrp5;Notch1;Notch4;Prkaca;Rara;Rarg;Tsc2;Shank3;Med12;Fuz;Scrib;Plxnb2;Megf8;Tctn1;Acvr1;Acvr2b;Acvrl1;Adm;Angpt1;Agt;Agtr1a;Ahr;Apaf1;Ar;Areg;Rhoa;Rhob;Bak1;Bax;Phb2;Bcl10;Bcl2;Bcl2l11;Bmp2;Bmp4;Bmp7;Gdf2;Btrc;Casp8;Casr;Ctnnb1;Cd44;Cdh1;Celsr1;Cfl1;Cxcr2;Cxcr4;Cobl;Col4a1;Coq7;Csf1;Csnk2b;Ctsh;Dag1;Dlg1;Dll1;Dvl1;Eda;Edar;Edn1;Ednra;Efnb2;Egf;Egfr;Enah;Eng;Epha2;Epha4;Epha7…	18	Ddr1;Dvl2;Dvl3;Kat2a;Lrp5;Notch1;Notch4;Prkaca;Rara;Rarg;Tsc2;Shank3;Med12;Fuz;Scrib;Plxnb2;Megf8;Tctn1
GO:0005912	black	adherens junction	CC	0.05	420	2.27748	Dnm2;Gna12;Gnb2;Hspg2;Lasp1;Limk1;Lrp1;Notch1;Pik3r2;Sorbs3;Slc9a1;Atp6v0a2;Tle2;Map2k2;Mapk3;Pvrl1;Camsap3;Pak4;Sptbn4;Scrib;Git1;Actb;Actc1;Actn2;Adam10;Adam17;Adam9;Add1;Alcam;Anxa5;Anxa6;Apc;Rplp0;Arf1;Arf6;Rhoa;Rhob;Arpc1b;Atp6v0c;B2m;Bsg;Hyou1;Calr;Cap1;Capn1;Capn2;Capn5;Cat;Cask;Ctnna1;Ctnna2;Ctnnb1;Ctnnd1;Cav1;Cav2;Ccnd3;Cd151;Scarb2;Cd44;Cd81;Cd9;Cdh1;Cdh13;Cdh2;Cdh3;Cdh5;Cfl1;Cnn1;Cnn2;…	21	Dnm2;Gna12;Gnb2;Hspg2;Lasp1;Limk1;Lrp1;Notch1;Pik3r2;Sorbs3;Slc9a1;Atp6v0a2;Tle2;Map2k2;Mapk3;Pvrl1;Camsap3;Pak4;Sptbn4;Scrib;Git1
GO:0007006	black	mitochondrial membrane organization	BP	0.075	80	2.27744	Slc9a1;Zfp13;Naif1;Mfn2;Rhot2;Gsk3a;Slc25a4;Slc25a5;Atf2;Atpif1;Bad;Bak1;Bax;Bcl2;Bcl2l1;Bid;Bcl2l11;Bnip3;Bnip3l;Camk2a;Cnp;Eya2;Htt;Hk2;Hsp90aa1;Hspa4;Ier3;Myc;Pex5;Snca;Stat3;Trp53;Cln8;Timm9;Timm10;Siva1;Acaa2;Sh3glb1;Hebp2;Timm22;Pdcd5;Letm1;Mtch2;Gsk3b;Pmaip1;Rhot1;Moap1;Chchd3;Chchd6;Tomm7;Alkbh7;Timm50;Taz;Oma1;Ndufa13;Slc25a46;Mtfp1;Tomm20;Apoo;Mul1;Samm50;Pink1;Afg3l2;Plekhf1;Bloc1s2;Op…	6	Slc9a1;Zfp13;Naif1;Mfn2;Rhot2;Gsk3a
GO:0008361	black	regulation of cell size	BP	0.0617284	162	2.26921	Adnp;Dnm2;Limk1;Nkx6-1;Tsc2;Shank3;Anapc2;Wdtc1;Lrrc8a;Megf8;Aatk;Abl1;Add1;Ahr;Akt1;Anxa7;Apoe;Aqp1;Arhgap5;Rnd2;Atp2b2;Bdnf;Bmpr2;Rb1cc1;Cdh4;Cdk4;Cdk5;Cdk5r1;Cfl1;Clcn3;Clns1a;Ccr5;Crabp2;Creb1;Dpysl2;Cttn;Dscam;Edn1;Efna5;Epha7;Bcl11a;Fgf13;Fn1;Fxn;Slc6a12;Hsp90ab1;Hsp90aa1;Ifrd1;Il7r;Ilk;Kcnma1;Kcnn4;L1cam;Map1b;Mapt;Ngf;Npm1;Nrp1;Ntn1;Ntrk3;Omg;P2rx7;Pafah1b1;Plxna1;Plxna2;Plxna3;Pten;Rac1;…	10	Adnp;Dnm2;Limk1;Nkx6-1;Tsc2;Shank3;Anapc2;Wdtc1;Lrrc8a;Megf8
GO:0005874	black	microtubule	CC	0.0510753	372	2.26131	Dctn1;Dnm2;Kif1c;Pcnt;Apc2;Map2k2;Camsap3;Atat1;Golga2;Mapre3;Csnk1d;Slc8a2;Mta1;Nav1;Hid1;Cep170b;Sarm1;Nckap5l;Gsk3a;Macf1;Apc;Birc5;Apoe;Axin1;Axin2;Bcl10;Bicd1;Bcl2l11;Aspm;Capn6;Cct2;Cct3;Cct4;Cct5;Cct6a;Cct7;Cct8;Cdk1;Cnp;Crhbp;Dpysl2;Cyp2a5;Daxx;Dcx;Dlg1;Dnah8;Dync1h1;Dync1i1;Dync1i2;Dnm1;Dst;Dvl1;Mapre1;Eif3a;Emd;Fgf13;Fkbp4;Fmr1;Cfap20;Hdac3;Hdac6;Hspa8;Hsph1;Incenp;Invs;Kcnab2;Kif11;Kif…	19	Dctn1;Dnm2;Kif1c;Pcnt;Apc2;Map2k2;Camsap3;Atat1;Golga2;Mapre3;Csnk1d;Slc8a2;Mta1;Nav1;Hid1;Cep170b;Sarm1;Nckap5l;Gsk3a
GO:0004004	black	ATP-dependent RNA helicase activity	MF	0.0806452	62	2.26085	Ddx19a;Ddx39b;Dhx38;Dhx16;Dhx34;Dhx15;Ddx3x;Ddx4;Ddx5;Ddx6;Dhx9;Eif4a1;Eif4a2;Upf1;Ighmbp2;Ddx3y;Ddx24;Ddx25;Ddx56;Ddx20;Ddx21;Ddx18;Ddx17;Dhx40;Ddx47;Ddx55;Ddx59;Ddx39;Ddx51;Dhx35;Tdrd12;Ddx28;Ddx54;Ddx42;Dhx36;Dhx30;Ddx41;Ddx23;Tdrd9;Ddx10;Ddx52;Dqx1;Ddx50;Dhx32;Ddx1;Dhx57;Helb;Eif4a3;Dhx37;Ddx46;Dhx33;Dhx8;Dhx29;Ddx31;Ddx27;Ddx49;Ddx19b;Ythdc2;Snrnp200;Supv3l1;Gm8994;Ddx43	5	Ddx19a;Ddx39b;Dhx38;Dhx16;Dhx34
GO:0008186	black	RNA-dependent ATPase activity	MF	0.0806452	62	2.26085	Ddx19a;Ddx39b;Dhx38;Dhx16;Dhx34;Dhx15;Ddx3x;Ddx4;Ddx5;Ddx6;Dhx9;Eif4a1;Eif4a2;Upf1;Ighmbp2;Ddx3y;Ddx24;Ddx25;Ddx56;Ddx20;Ddx21;Ddx18;Ddx17;Dhx40;Ddx47;Ddx55;Ddx59;Ddx39;Ddx51;Dhx35;Tdrd12;Ddx28;Ddx54;Ddx42;Dhx36;Dhx30;Ddx41;Ddx23;Tdrd9;Ddx10;Ddx52;Dqx1;Ddx50;Dhx32;Ddx1;Dhx57;Helb;Eif4a3;Dhx37;Ddx46;Dhx33;Dhx8;Dhx29;Ddx31;Ddx27;Ddx49;Ddx19b;Ythdc2;Snrnp200;Supv3l1;Gm8994;Ddx43	5	Ddx19a;Ddx39b;Dhx38;Dhx16;Dhx34
GO:0015908	black	fatty acid transport	BP	0.0806452	62	2.26085	Bdkrb2;Hnf1a;Slc27a4;Kiss1r;Abcc4;Ace;Plin2;Akt1;Akt2;Abcd1;Apoe;Cd36;Abcc2;Cpt1b;Drd2;Drd3;Edn1;Fabp3;Fabp2;Acsl1;Hrh2;Il1a;Il1b;Anxa1;Abcc1;Mif;Nos2;Ntsr1;P2rx7;P2ry2;Pla2r1;Pla2g4a;Pla2g5;Pparg;Abcd3;Slc25a17;Syk;Thbs1;Tnfrsf11a;Slco2a1;Map2k6;Mapk9;Slc27a1;Slc27a2;Slc27a5;Pla2g10;Acsl4;Pla2g6;Repin1;Pnpla8;Nmb;Cyp4f18;Crot;Acsl3;Mfsd2a;Slco3a1;Acsl6;Fam132b;Pla2g4f;Spx;Irs2;Acsl5	5	Bdkrb2;Hnf1a;Slc27a4;Kiss1r;Abcc4
GO:0032414	black	positive regulation of ion transmembrane transporter activity	BP	0.0806452	62	2.26085	Dnm2;Hap1;Hspa2;Slc9a1;Shank3;Asic2;Actn2;Adrb1;Ager;Ank3;Arc;Atp1b1;Atp1b2;Atp1b3;Bmp4;Cftr;Ctss;Dmd;Fgf14;Gal;Galr2;Gsto1;Hcn1;Htt;Ikbkb;Kcnj11;Ntsr1;Pkd2;Plcb1;Prkg1;Ptafr;Reln;Rgn;Ryr2;S100a1;Stim1;Trpc6;Sumo1;Chp1;Kcne3;Tesc;Jph2;Asph;Gstm7;Wnk2;Tcaf1;Nedd4l;Glrx;Ank2;Stim2;Pirt;Cnksr3;Rapgef3;Nppa;Plcg2;Akap6;Nlgn3;Kcne2;Wnk3;Cracr2a;Akap7;Rnf207	5	Dnm2;Hap1;Hspa2;Slc9a1;Shank3
GO:0043967	black	histone H4 acetylation	BP	0.0806452	62	2.26085	Ctbp1;Kat2a;Tcf3;Brd4;Auts2;Apbb1;Atg5;Brca1;Brca2;Epc1;Hcfc1;Irf4;Lef1;Msl3;Ncoa1;Per1;Ruvbl2;Spi1;Smarcb1;Morf4l1;Ing4;Mcrs1;Morf4l2;Actl6a;Ruvbl1;Yeats4;Dmap1;Kat8;Pih1d1;Kansl2;Meaf6;Ing3;Naa50;Msl3l2;Iws1;Msl1;Elp3;Atg7;Naa60;Ep400;Kansl1;Jade2;Elp4;Msl2;Brd8;Sirt1;Trim16;Trrap;Hat1;Ogt;Arrb1;Wdr5;Kmt2a;Usp22;Kat7;Kansl3;Phf20;Jade1;Chd5;Ep300;Bend3;Jade3	5	Ctbp1;Kat2a;Tcf3;Brd4;Auts2
GO:0045787	black	positive regulation of cell cycle	BP	0.0543478	276	2.25854	Ccnd2;Flt3l;Hspa2;Lrp5;Prkaca;Rara;Tcf3;Wiz;Brd4;Usp19;Xrcc3;Med25;Mapre3;Cdk9;Ppp2r5b;Abl1;Adam17;Aif1;Akt1;Apex1;Birc5;App;Rhoa;Phb2;Bcl2l11;Cxcr5;Brca1;Brca2;Btc;Calr;Camk2b;Casp2;Cast;Ccnd1;Ccnd3;Ccnk;Ccnt1;Cd28;Cdc25b;Cdk1;Cdc45;Cdc7;Cdk4;Cdk5r1;Cdkn1a;Cdkn1b;Cdkn2a;Cit;Cradd;Crebbp;Cyp1a1;Dazl;Ddx3x;Drd2;Drd3;Ect2;Edn1;Edn3;Egf;Egfr;Eif4e;Eif4ebp1;Ereg;Ptprv;Fap;Fgfr1;Fgfr2;Ctgf;Fnta;Fosl1;…	15	Ccnd2;Flt3l;Hspa2;Lrp5;Prkaca;Rara;Tcf3;Wiz;Brd4;Usp19;Xrcc3;Med25;Mapre3;Cdk9;Ppp2r5b
GO:0022898	black	regulation of transmembrane transporter activity	BP	0.0613497	163	2.24823	Cacnb1;Cacnb3;Dnm2;Hap1;Hspa2;Slc9a1;Mink1;Jph3;Shank3;Mapk8ip2;Asic2;Chrna4;Actn2;Adrb1;Ager;Agrn;Ank3;Slc25a4;Arc;Atp1b1;Atp1b2;Atp1b3;Fxyd2;Bcl2;Bmp4;Cacna1d;Cacnb2;Cacnb4;Cacng2;Casq2;Cav1;Cftr;Cnih2;Crhbp;Crhr1;Ctss;Dlg4;Dmd;Drd2;Drd3;Stom;Fgf12;Fgf14;Fhl1;Fkbp1a;Fkbp1b;Gal;Galr2;Gnb5;Gsto1;Hcn1;Htt;Hk1;Hrc;Ikbkb;Ins2;Kcnab1;Kcnj11;Kcnq1;Fxyd3;Mef2c;Mmp9;Myo5a;Ntsr1;Fxyd5;Oprl1;Oprm1;Pde4b;P…	10	Cacnb1;Cacnb3;Dnm2;Hap1;Hspa2;Slc9a1;Mink1;Jph3;Shank3;Mapk8ip2
GO:0006275	black	regulation of DNA replication	BP	0.0633803	142	2.23734	Inppl1;Shc1;Wiz;Mapk3;Pnkp;Cdt1;Ciz1;Ehmt2;Acd;Areg;Atf1;Atm;Bmp4;Bmp5;Brca2;Cacybp;Calr;Ctnnb1;Cct2;Cct3;Cct4;Cct5;Cct6a;Cct7;Cct8;Cdk1;Cdc42;Cdc7;Cdk2;Csf2;Smc3;Cst3;Dach1;Egfr;Ereg;Gli1;Gli2;Hnrnpc;Hras;Hus1;Id3;Igf1;Igf1r;Il6;Ins2;Insr;Jun;Klf4;Lig3;Mapkapk5;Mas1;Men1;Met;Kitl;Mre11a;Nek2;Nf2;Npm1;Pcna;Pdgfa;Pdgfb;Pdgfra;Prkcq;Pkib;Pla2g1b;Pml;Pparg;Rac1;Rad17;Rbbp6;Src;Stag2;Aurkb;Tcp1;Terf1…	9	Inppl1;Shc1;Wiz;Mapk3;Pnkp;Cdt1;Ciz1;Ehmt2;Acd
GO:0042826	black	histone deacetylase binding	MF	0.0693069	101	2.22937	Kat2a;Rara;Ncor2;Sp2;Camta2;Wdtc1;Pkn1;Parp1;Hnrnpd;Prdm1;Runx2;Runx3;Cbx5;Ccnd1;Cebpa;Cebpb;Cry1;Dnmt1;Dnmt3b;Lpin1;Gcm1;Gli3;Hdac3;Hdac5;Hdac6;Hes1;Hey2;Hic1;Hif1a;Hr;Hsp90ab1;Hsp90aa1;Klf4;Kpna2;Lef1;Mecp2;Mef2a;Mef2b;Mef2c;Mef2d;Sik1;Kat2b;Phb;Rac1;Rad9a;Rbbp4;Rela;Rfxank;Ncor1;Foxp3;Sp1;Srf;Tal1;Tcf21;Top2a;Top2b;Nr2c1;Traf6;Usf1;Xbp1;Ywhae;Yy1;Mta2;Mapk8;Park2;Brms1l;Insm1;Ddx20;Ywhab;Gmnn;…	7	Kat2a;Rara;Ncor2;Sp2;Camta2;Wdtc1;Pkn1
GO:0006643	black	membrane lipid metabolic process	BP	0.0629371	143	2.21455	Pigq;St3gal3;Sphk2;Pigo;Fam57b;Pigt;Pigs;Pgap3;Gal3st3;Gla;Alox12b;Bax;Cel;Cln3;Crem;Cyp1b1;Degs1;Dpm1;Dpm2;Galc;B4galnt1;Gba;Gm2a;Gpaa1;Gpld1;Hexa;Hexb;Cyr61;Kit;Map7;Naga;Neu1;P2rx1;P2rx7;Piga;Pigf;Prkcd;Pnliprp2;Plpp1;Psap;Sftpb;Sgpl1;St3gal1;St3gal4;St3gal2;St6galnac2;St6galnac3;St6galnac4;St8sia1;St8sia2;St8sia3;St8sia4;St3gal5;Smpd1;Smpd2;Sphk1;Sptlc2;Ugcg;Ugt8a;Aloxe3;Neu2;Cln8;St6galnac5;…	9	Pigq;St3gal3;Sphk2;Pigo;Fam57b;Pigt;Pigs;Pgap3;Gal3st3
GO:0007050	black	cell cycle arrest	BP	0.0655738	122	2.2129	Prkaca;Stk11;Zbtb49;Med25;Sgsm3;Cdk9;Ppp2r5b;Vash1;Macf1;Ak1;Apbb1;Apbb2;Apc;Atm;Brca1;Calr;Casp2;Cast;Ccnd1;Ccnk;Cdk4;Cdk5r1;Cdkn1a;Cdkn1b;Cdkn1c;Cdkn2a;Cdkn2b;Cdkn2c;Cdkn2d;Cradd;Gadd45a;Ddit3;Dst;Ptprv;Fap;Ppm1g;Foxm1;Gas1;Gas2;Gata6;Hras;Id2;Il12a;Il12b;Ilk;Inhba;Irf1;Uhmk1;Smad3;Mdm2;Mdm4;Men1;Mif;Mlf1;Msh2;Myc;Neurod1;Notch2;Mybbp1a;Pkd1;Pkd2;Pml;Pmp22;Pou4f1;Rb1;Skil;Slfn1;Sox4;Tbrg1;Tcf7l…	8	Prkaca;Stk11;Zbtb49;Med25;Sgsm3;Cdk9;Ppp2r5b;Vash1
GO:0048814	black	regulation of dendrite morphogenesis	BP	0.0731707	82	2.21004	Cux2;Numbl;Stk11;Shank3;Anapc2;Sarm1;Ache;Chrnb2;Neurog3;Camk2b;Cdk5;Cdk5r1;Cfl1;Cit;Cux1;Eef2k;Efna1;Epha4;Grin1;Sdc2;Id1;Ilk;Lrp8;Met;Pias2;Nedd4;Numb;Pafah1b1;Pak3;Ppp3ca;Pten;Ptprd;Ptprf;Ptprz1;Reln;Robo1;Sema4d;Sgk1;Tiam1;Trpc5;Trpc6;Ywhah;Xlr4b;Stau2;Caprin1;Ngef;Pqbp1;Srcin1;Dbn1;Pdlim5;Gsk3b;Nsmf;Syne1;Cul7;Lrrk2;Bhlhb9;Nfatc4;Actr3;Gorasp1;Rapgef2;Rap2a;Fbxo31;Kndc1;Dnm3;Baiap2;Chrna3;Nl…	6	Cux2;Numbl;Stk11;Shank3;Anapc2;Sarm1
GO:0060840	black	artery development	BP	0.0731707	82	2.21004	Dnm2;Lrp1;Nprl3;Notch1;Notch4;Fuz;Acvr2b;Acvrl1;Apoe;Prdm1;Bmp4;Bmpr2;Ctnnb1;Cxcr4;Col3a1;Efnb2;Eng;Ephb4;Eya1;Foxh1;Foxc2;Folr1;Gja5;Gli3;Lrp2;Hand2;Hes1;Hey1;Hey2;Foxf1;Hoxa1;Hpgd;Ndst1;Jag1;Kif7;Lox;Smad6;Smad7;Foxc1;Cited2;Nf1;Notch3;Nrp1;Pdgfrb;Prrx1;Prox1;Ptger4;Rbpj;Prrx2;Shh;Smarca4;Sox4;Srf;Stra6;Tbx1;Tbx2;Tgfbr1;Vegfa;Wnt11;Sufu;Cntrl;Angptl3;Dll4;Dctn5;Tab1;Plxnd1;Ap2b1;Myh10;Sec24b;Pr…	6	Dnm2;Lrp1;Nprl3;Notch1;Notch4;Fuz
GO:0035270	black	endocrine system development	BP	0.0686275	102	2.20072	Nkx2-2;Nkx6-1;Hnf1a;Thra;Map2k2;Mapk3;Rap1gap;Apoa1;Arntl;Neurog3;Bad;Bmp2;Bmp4;Bmp5;Bmp6;Bmpr1a;Cdk6;Cdkn1c;Clock;Clu;Creb1;Crhr1;Crkl;Dll1;Drd2;Eif2ak3;Fgf2;Gata2;Gata3;Gata6;Gli1;Gli2;Nr3c1;Nkx6-2;Hes1;Hhex;Mnx1;Hmga2;Foxa2;Onecut1;Hoxa3;Hoxa5;Hoxb3;Hoxd3;Igf1r;Il6;Il6ra;Insr;Isl1;Lhx3;Ly6e;Smad3;Ascl1;Mdk;Men1;Bhlha15;Cited2;Myt1;Neurod1;Nf1;Pax6;Pax8;Pbx1;Pde3b;Pdgfra;Pdgfrb;Pdpk1;Pdx1;Pou1f…	7	Nkx2-2;Nkx6-1;Hnf1a;Thra;Map2k2;Mapk3;Rap1gap
GO:0003300	black	cardiac muscle hypertrophy	BP	0.078125	64	2.18059	Slc9a1;Ddx39b;Cdk9;Camta2;Gsk3a;Adk;Parp1;Adrb1;Agt;Akap1;Slc25a4;Atp2a2;Col14a1;Edn1;Ezh2;G6pdx;Gata4;Gata6;Mtpn;Nr3c1;Hey2;Htr2b;Igf1;Mef2c;Nfatc3;Nr4a3;Nppb;P2rx4;Pde9a;Prkca;Ppp3ca;Prkg1;Rgs2;Ryr2;Tcap;Tiam1;Trpc3;Ttn;Wisp1;Pin1;Map2k4;Glrx3;Lmcd1;Pdlim5;Gsk3b;Mtor;Klf15;Ctdp1;Mlip;Pi16;Errfi1;Akap13;Inpp5f;Camk2d;Fdps;Myh7;Myocd;Kdm4a;Ece1;Nppa;Sorbs2;Akap6;Pde5a;Atp2b4	5	Slc9a1;Ddx39b;Cdk9;Camta2;Gsk3a
GO:0021761	black	limbic system development	BP	0.078125	64	2.18059	Cdk5r2;Hap1;Ptprs;Xrcc1;Atat1;Bax;Bcan;Btg2;Cdk5;Cdk5r1;Dcx;Dlx1;Drd1;Epha5;Fgf13;Fgfr1;Fgfr2;Gli3;Hdac2;Id4;Kcna1;Kif3a;Lef1;Lrp8;Mdk;Neurod1;Nf1;Nf2;Nr4a3;Nrp1;Nrp2;Pafah1b1;Pak1;Plxna3;Prox1;Pten;Reln;Sema3a;Srf;Tbr1;Tbx3;Nkx2-1;Ubb;Usp9x;Ywhae;Zeb2;Zbtb18;Bbs1;Fezf2;Gsk3b;Aldh1a3;Mkks;Tsc1;Bbs2;Kirrel3;Dclk2;Bbs4;Kdm6b;Rab3gap1;Uba6;Smo;Kif14;Hdac1;Dear1	5	Cdk5r2;Hap1;Ptprs;Xrcc1;Atat1
GO:0032006	black	regulation of TOR signaling	BP	0.078125	64	2.18059	Gna12;Nprl3;Stk11;Tsc2;Gsk3a;Araf;Arntl;Atm;Slc7a1;Slc7a3;Epm2a;Gas6;Hdac3;Hif1a;Kdr;Mtm1;Pdcd6;Reln;Rheb;Ros1;Ubr1;Xbp1;Rragc;Nprl2;Lamtor3;Mlst8;Tsc1;Lamtor4;Tnfaip8l1;Lamtor1;Golph3;Tbc1d7;Akt1s1;Rraga;Lamtor5;Pih1d1;Tmem127;Fbxo9;Telo2;Fam83d;Seh1l;Rptor;Ddit4;Tti1;Rictor;Lamtor2;Sirt1;Deptor;Sh3bp4;Prkaa1;Prkaa2;Sec13;Fnip1;Flcn;Ubr2;Agpat9;Pkhd1;Rragb;Mios;Slc38a9;Wdr24;Depdc5;Wdr59;Rnf152	5	Gna12;Nprl3;Stk11;Tsc2;Gsk3a
GO:0000792	black	heterochromatin	CC	0.0722892	83	2.17708	Mbd3;Sirt6;Lrwd1;Kdm4b;Rnf40;Cbx6;Aldoa;Bmi1;Cbx1;Cbx2;Cbx3;Cbx5;Cdkn2a;Cenpc1;Daxx;Ddx6;Dnmt1;Dnmt3a;Dnmt3b;Phc1;Eed;Smarcad1;Hdac2;Hells;Hmga1;Hsf1;Igfbp3;Incenp;Mbd1;Mbd2;Mecp2;Foxc1;Uhrf1;Orc2;Ring1;Rnf2;Satb1;Smarca4;Suv39h1;Tcp1;Trim28;Top2b;Uba1;Ube2a;Ube2b;Sumo1;Vdr;Baz1b;Atrx;Pcgf2;Zfp57;Ikzf1;H2afy;Cbx8;H2afz;Cbx7;Suz12;Phc2;Sall1;Sirt2;Suv39h2;A1cf;Esco2;Rrp1b;Mphosph8;Kdm4c;Ncapd3;Sir…	6	Mbd3;Sirt6;Lrwd1;Kdm4b;Rnf40;Cbx6
GO:0005814	black	centriole	CC	0.0722892	83	2.17708	Hap1;Pcnt;Cep164;Ccdc92;Fbf1;Crocc;Birc5;Bnip2;Capg;Ccnf;Cetn3;Cfap20;Htt;Cep250;Mdm1;Nedd1;Nin;Odf2;Pcm1;Ran;Rp2;Stil;Plk2;Plk4;Ift88;Top2a;Tssk2;Tsks;Cetn2;Cep63;Ahi1;Ift20;Sirt2;Dzip1;Cep19;Sclt1;Poc1a;Cep192;Wdr34;Cep89;Dzip1l;Sass6;Ccsap;Ccdc146;Cep128;Sdccag8;Cep83;Ccdc151;Agbl4;Cep41;Cep152;Ccp110;Bbs4;Tubg1;Topors;Kif24;Ttbk2;Hspa1a;Cetn4;Spice1;Cntrob;Cenpj;Cep76;Cep104;Ccdc67;Alms1;Ofd1…	6	Hap1;Pcnt;Cep164;Ccdc92;Fbf1;Crocc
GO:0061659	black	ubiquitin-like protein ligase activity	MF	0.0582011	189	2.17157	Med24;Trim3;Pias4;Med12;Ube4b;Ube2v1;Rnf126;Syvn1;Smurf1;Anapc2;Peli3;Xiap;Btrc;Aktip;Itch;Mgrn1;Mdm2;Pias2;Nedd4;Neurl1a;Uhrf1;Pja1;Med1;Rbbp6;Rlim;Rnf2;Rnf4;Rnf7;Siah1a;Siah1b;Siah2;Hltf;Skp1a;Trim24;Traf6;Traip;Ube2a;Ube2b;Ube2g2;Ube2h;Ube3a;Ubr1;Vhl;Amfr;Arih1;Arih2;Rnf13;Rfwd2;Cul3;Cul1;Skp2;Prpf19;Med10;Rnf19a;Fbxo6;Park2;Ccnc;Rnf24;Ube2k;Pdzrn3;Ube2j1;Stub1;Rbx1;Pias1;Rnf138;Rabgef1;Rnf14;…	11	Med24;Trim3;Pias4;Med12;Ube4b;Ube2v1;Rnf126;Syvn1;Smurf1;Anapc2;Peli3
GO:0048568	black	embryonic organ development	BP	0.05	380	2.16371	Dvl2;Dvl3;Epn1;Flt3l;Hspg2;Notch1;Pcnt;Rara;Rarg;Zfpm1;Mapk3;Med12;Fuz;Sp2;Scrib;Slc39a3;Llgl2;Vps52;Megf8;Acvr1;Ada;Adm;Ahr;Akt1;Aldh1a1;Alx4;Nr2f2;Arnt;Atp2b2;Pcdh15;Axin1;Prdm1;Bmi1;Bmp2;Bmp4;Bmp7;Bmpr1a;Zfp36l1;Birc6;Ctnnb1;Runx2;Runx1;Cdkn1c;Cdx2;Cdx4;Cebpa;Cebpb;Celsr1;Socs3;Cited1;Col11a1;Col2a1;Csf2;Dlg1;Dll1;Dlx6;Dvl1;Edn1;Efna1;Egfr;Eng;Epas1;Epha2;Ephb2;Epn2;Erf;Eya1;Eya4;Foxh1;Fgf9;Fg…	19	Dvl2;Dvl3;Epn1;Flt3l;Hspg2;Notch1;Pcnt;Rara;Rarg;Zfpm1;Mapk3;Med12;Fuz;Sp2;Scrib;Slc39a3;Llgl2;Vps52;Megf8
GO:0044708	black	single-organism behavior	BP	0.0493827	405	2.16287	Adnp;Zfhx3;Cacna1c;Cux2;Eif4ebp2;Grin2d;Psen2;Thra;Slc12a5;Jph3;Shank3;Mapk8ip2;Sptbn4;Hrh3;Ehmt2;Slc8a2;Mta1;Zfhx2;Auts2;Crtc1;Abl2;Asic1;Chrna4;Chrna7;Chrnb1;Chrnb2;Ada;Adam22;Adcy8;Adcyap1;Adh1;Adora1;Adora2a;Parp1;Adra1b;Adrb1;Adrb2;Agrp;Alb;Apbb1;App;Aprt;Ar;Arf4;Atp8a1;Pcdh15;Axin1;Bche;Bcl2;Bdnf;Btg2;Tspo;Cacna1a;Cacna1e;Cacnb4;Calb1;Camk4;Casp1;Casp3;Runx1;Cck;Cdk5;Chat;Chl1;Clcn3;Cln3;Cn…	20	Adnp;Zfhx3;Cacna1c;Cux2;Eif4ebp2;Grin2d;Psen2;Thra;Slc12a5;Jph3;Shank3;Mapk8ip2;Sptbn4;Hrh3;Ehmt2;Slc8a2;Mta1;Zfhx2;Auts2;Crtc1
GO:0016747	black	transferase activity, transferring acyl groups other than amino-acyl groups	MF	0.0578947	190	2.15286	Fasn;Kat2a;Med24;Agpat1;Fam57b;Zdhhc1;Naa40;Atat1;Lpcat4;Tada3;Zdhhc9;Aanat;Alas1;Alas2;Atf2;Baat;Brca2;Ciita;Cdyl;Chat;Clock;Cpt1a;Cpt1b;Cpt2;Crat;Crebbp;Dbt;Dgat1;Epc1;Gnpat;Gpam;Lpcat3;Hcfc1;Ifnb1;Lcat;Nat1;Nat2;Ncoa1;Ncoa2;Ncoa3;Nmt1;Nmt2;Pafah1b2;Pafah1b3;Kat2b;Sat1;Scp2;Soat1;Sptlc2;Taf10;Slc27a3;Hrasls;Zdhhc8;Tada1;Agpat3;Mcrs1;Hgsnat;Agpat5;Acaa2;Porcn;Kat6b;Elovl1;Elovl2;Gnpnat1;Sh3glb1;…	11	Fasn;Kat2a;Med24;Agpat1;Fam57b;Zdhhc1;Naa40;Atat1;Lpcat4;Tada3;Zdhhc9
GO:0071383	black	cellular response to steroid hormone stimulus	BP	0.0578947	190	2.15286	Rara;Rarg;Thra;Wbp2;Med24;Med12;Pelp1;Med16;Safb;Ipo13;Kmt2d;Parp1;Agtr1a;Nr2f2;Aqp1;Ar;Rhoa;Arntl;Atp1a1;Phb2;Bdnf;Bmp4;Bmp7;Brca1;Calr;Nr1i3;Casp9;Clock;Crhbp;Cry1;Cry2;Cyp7b1;Dab2;Daxx;Ddx5;Egfr;Nr2f6;Nr2f1;Esr1;Foxh1;Fkbp4;Nr6a1;Gdnf;Nr3c1;Hmga2;Nr4a1;Foxa1;Hnf4a;Prmt2;Hsf1;Dnaja1;Ifnb1;Igf1;Irg1;Isl1;Jak2;Klf9;Lef1;Anxa1;Pias2;Mmp2;Msn;Mstn;ND3;Naip1;Naip2;Naip6;Ncoa2;Ncoa3;Nr4a3;Npc1;Nr1i2;…	11	Rara;Rarg;Thra;Wbp2;Med24;Med12;Pelp1;Med16;Safb;Ipo13;Kmt2d
GO:0048167	black	regulation of synaptic plasticity	BP	0.0616438	146	2.14729	Eif4ebp2;Psen2;Rara;Jph3;Shank3;Ppfia3;Anapc2;Slc8a2;Crtc1;Adora1;Adora2a;Adrb1;Agt;Arf1;Atp2b2;Bdnf;Calb1;Camk2a;Camk2b;Cd38;Cdk5;Cpeb1;Cplx2;Creb1;Crhr1;Crhr2;Cx3cr1;Dbi;Dlg4;Drd1;Drd2;Egr1;Ephb2;Fgf14;Gfap;Grik2;Grin1;Grin2a;Grin2b;Nr3c1;Htt;Hnrnpk;Hras;Hrh1;Hrh2;Htr7;Itpr3;Kcnb1;Kcnj10;Kdr;Kit;Kras;Lmx1b;Mecp2;Mef2c;Rab8a;Mmp9;Mapt;Myo6;Neurl1a;Nf1;Nos1;Ctnnd2;Ntrk2;Pak1;Pick1;Prkcz;Psen1;Pte…	9	Eif4ebp2;Psen2;Rara;Jph3;Shank3;Ppfia3;Anapc2;Slc8a2;Crtc1
GO:1990138	black	neuron projection extension	BP	0.0616438	146	2.14729	Adnp;Dnm2;Limk1;Nkx6-1;Stk11;Smurf1;Anapc2;Plxnb1;Megf8;Aatk;Abl1;Apoe;Bdnf;Bmpr2;Cdh4;Cdk5;Cdk5r1;Ccr5;Cpne6;Dpysl2;Cttn;Dclk1;Dcx;Dscam;Dvl1;Fn1;Fxn;Hnrnpk;Ifrd1;Ilk;Impact;Itgb1;L1cam;Lamb2;Map1b;Mapt;Ndn;Ngf;Nrp1;Nrp2;Ntn1;Ntrk3;Pafah1b1;Prkcz;Plxna1;Plxna2;Plxna3;Rasal1;Reg1;Ryk;Cxcl12;Sema3a;Sema3b;Sema3c;Sema3e;Sema3f;Sema4a;Sema4b;Sema4c;Sema4d;Sema4f;Sema5a;Sema5b;Sema6a;Sema6b;Sema6c;Se…	9	Adnp;Dnm2;Limk1;Nkx6-1;Stk11;Smurf1;Anapc2;Plxnb1;Megf8
GO:0022037	black	metencephalon development	BP	0.0714286	84	2.14459	Cdk5r2;Kat2a;Hap1;Pcnt;Ptprs;Scrib;Abl1;Abl2;Phox2a;Atp2b2;Atp7a;Atrn;Bcl2;Cacna1a;Cbln1;Cbs;Cdk5;Cdk5r1;Cntn1;Dab1;Dll1;Ezh2;Fzd4;Gas1;Gli1;Gli2;Gnpat;Grid2;Grin1;Hspa5;Hoxa1;Ldb1;Lhx1;Lmx1b;Lrp6;Ascl1;Mdk;Mecp2;Neurod1;Nfix;Prox1;Ptf1a;Ptpn11;Rora;Atxn2;Sdf4;Sema4c;Sez6;Serpine2;Sptbn2;Nr2c2;Trp53;Ulk1;Usp9x;Map2k1;Naglu;Zbtb18;B4galt2;Sez6l;Cend1;Pfdn1;Agtpbp1;Rere;Trnp1;Rfx4;Faim2;2410089E03R…	6	Cdk5r2;Kat2a;Hap1;Pcnt;Ptprs;Scrib
GO:0060996	black	dendritic spine development	BP	0.0714286	84	2.14459	Cux2;Slc12a5;Shank3;Pak4;Git1;Zmynd8;Apoe;Arf1;Arf4;Arf6;Camk2b;Cdk5;Cdk5r1;Cfl1;Asap1;Dlg4;Dvl1;Eef2k;Efna1;Eif4g2;Epha4;Epha5;Ephb2;Ephb3;Fmr1;Srgap2;Lpar1;Nr3c1;Grn;Hdac2;Hdac6;Hnrnpk;Il2;Lrp8;Mapkapk5;Mef2c;Nck2;Neurl1a;Ngfr;Ctnnd2;Pafah1b1;Pak1;Pak3;Palm;Psen1;Pten;Reln;Plk2;Tiam1;Xlr4b;Stau2;Mapk6;Acsl4;Camk1;Caprin1;Ngef;Srcin1;Dbn1;Pdlim5;Mtor;Lrrk2;Bhlhb9;Prmt3;Dnm3;Baiap2;Nlgn1;Cpeb3;Nr…	6	Cux2;Slc12a5;Shank3;Pak4;Git1;Zmynd8
GO:0070161	black	anchoring junction	CC	0.0486111	432	2.14187	Dnm2;Gna12;Gnb2;Hspg2;Lasp1;Limk1;Lrp1;Notch1;Pik3r2;Sorbs3;Slc9a1;Atp6v0a2;Tle2;Map2k2;Mapk3;Pvrl1;Camsap3;Pak4;Sptbn4;Scrib;Git1;Actb;Actc1;Actn2;Adam10;Adam17;Adam9;Add1;Alcam;Anxa5;Anxa6;Apc;Rplp0;Arf1;Arf6;Rhoa;Rhob;Arpc1b;Atp6v0c;B2m;Bsg;Hyou1;Calr;Cap1;Capn1;Capn2;Capn5;Cat;Cask;Ctnna1;Ctnna2;Ctnnb1;Ctnnd1;Cav1;Cav2;Ccnd3;Cd151;Scarb2;Cd44;Cd81;Cd9;Cdh1;Cdh13;Cdh2;Cdh3;Cdh5;Cfl1;Cnn1;Cnn2;…	21	Dnm2;Gna12;Gnb2;Hspg2;Lasp1;Limk1;Lrp1;Notch1;Pik3r2;Sorbs3;Slc9a1;Atp6v0a2;Tle2;Map2k2;Mapk3;Pvrl1;Camsap3;Pak4;Sptbn4;Scrib;Git1
GO:0015297	black	antiporter activity	MF	0.0769231	65	2.14159	Slc4a3;Slc9a1;Slc25a10;Slc9a8;Slc8a2;Slc7a1;Slc7a2;Slc7a3;Clcn3;Clcn4;Clcn5;Slc26a3;Slc26a2;Slc11a1;Slc22a5;Slc4a1;Slc4a2;Slc7a5;Slc7a7;Slc8a1;Slc26a4;Clcn6;Clcn7;Slc7a11;Slc22a4;Slc7a8;Slc7a10;Slc4a4;Slc22a21;Slc4a8;Slc47a1;Slc9b1;Slc38a3;Slc24a2;Slc26a5;Slc4a10;Slc24a3;Slc9b2;Slc8a3;Slc8b1;Slc22a27;Slc26a6;Slc26a7;Slc24a1;Slc26a10;Slc4a7;Slc7a4;Slc26a8;Slc9a2;Slc26a1;Tmco3;Slc22a29;Slc9a7;Slc24…	5	Slc4a3;Slc9a1;Slc25a10;Slc9a8;Slc8a2
GO:0033500	black	carbohydrate homeostasis	BP	0.0572917	192	2.1158	Cacna1c;Lrp5;Pik3r2;Prkaca;Rab11b;Ncor2;Stk11;Hnf1a;Sirt6;Plscr3;Ncoa5;Adra1b;Adra2a;Akt1;Birc5;Apoc3;Aqp4;Bad;Cacna1e;Cdkn2a;Cebpa;Cftr;Cnr1;Crhr2;Cry1;Cry2;Efna5;Epha5;Ptprv;Fgfr4;Fkbp1b;G6pc2;Slc37a4;Gas6;Gcg;Gcgr;Rack1;Gpi1;Gpld1;Gpr27;Gk;Hif1a;Hk1;Hk2;Hmgcr;Foxa1;Foxa2;Foxa3;Hnf4a;Icam1;Igf1;Igf1r;Igfbp5;Il6;Ins2;Insr;Kcnb1;Lepr;Met;Bhlha15;Myt1;Neurod1;Ngfr;Nrxn1;Pax6;Pck1;Cdk16;Pde3b;Pdk2;…	11	Cacna1c;Lrp5;Pik3r2;Prkaca;Rab11b;Ncor2;Stk11;Hnf1a;Sirt6;Plscr3;Ncoa5
GO:0042593	black	glucose homeostasis	BP	0.0572917	192	2.1158	Cacna1c;Lrp5;Pik3r2;Prkaca;Rab11b;Ncor2;Stk11;Hnf1a;Sirt6;Plscr3;Ncoa5;Adra1b;Adra2a;Akt1;Birc5;Apoc3;Aqp4;Bad;Cacna1e;Cdkn2a;Cebpa;Cftr;Cnr1;Crhr2;Cry1;Cry2;Efna5;Epha5;Ptprv;Fgfr4;Fkbp1b;G6pc2;Slc37a4;Gas6;Gcg;Gcgr;Rack1;Gpi1;Gpld1;Gpr27;Gk;Hif1a;Hk1;Hk2;Hmgcr;Foxa1;Foxa2;Foxa3;Hnf4a;Icam1;Igf1;Igf1r;Igfbp5;Il6;Ins2;Insr;Kcnb1;Lepr;Met;Bhlha15;Myt1;Neurod1;Ngfr;Nrxn1;Pax6;Pck1;Cdk16;Pde3b;Pdk2;…	11	Cacna1c;Lrp5;Pik3r2;Prkaca;Rab11b;Ncor2;Stk11;Hnf1a;Sirt6;Plscr3;Ncoa5
GO:0045017	black	glycerolipid biosynthetic process	BP	0.0634921	126	2.11379	Pigq;Inppl1;Srebf1;Agpat1;Pigo;Pigt;Pigs;Pgap3;Ang;Apoa1;Apoa2;Apoc3;Atm;C3;Chkb;Chka;Pcyt1a;Dgat1;Dpm1;Dpm2;Fabp3;Fgf2;Fgf7;Lpin1;Gpaa1;Gpam;Gpld1;Htr2a;Htr2b;Ajuba;Fabp5;Lcat;Ldlr;Lpl;Sik1;Pck1;Pdgfa;Pdgfb;Pemt;Piga;Pigf;Pik3ca;Pik3r1;Pip5k1c;Pip5k1b;Pip5k1a;Pla2g5;Pld1;Pld2;Plpp1;Ptdss1;Rgn;Scarb1;Tcf7l2;Thrsp;Plscr1;Nr1h3;Nr1h2;Sh3yl1;Slc27a1;Ptdss2;Pign;Ept1;Pik3cg;Cdipt;Pla2g6;Sh3glb1;Impa1…	8	Pigq;Inppl1;Srebf1;Agpat1;Pigo;Pigt;Pigs;Pgap3
GO:0045740	black	positive regulation of DNA replication	BP	0.0705882	85	2.11255	Shc1;Wiz;Mapk3;Pnkp;Ciz1;Acd;Areg;Atf1;Atm;Bmp4;Bmp5;Cacybp;Calr;Ctnnb1;Cct2;Cct3;Cct4;Cct5;Cct6a;Cct7;Cct8;Cdk1;Cdc42;Cdc7;Cdk2;Csf2;Cst3;Egfr;Ereg;Gli1;Gli2;Hras;Igf1;Igf1r;Il6;Ins2;Insr;Jun;Klf4;Mapkapk5;Mas1;Met;Kitl;Nek2;Npm1;Pcna;Pdgfa;Pdgfb;Pdgfra;Prkcq;Pkib;Pla2g1b;Rac1;Aurkb;Tcp1;Tgfb3;Tnfaip1;Tnks;Atrx;Grem1;Map2k4;Map2k7;Map3k4;Mapk1;Mapk8;E2f7;Pdgfc;Nek7;Stoml2;Nvl;Ino80;Ctc1;Pot1a;Ob…	6	Shc1;Wiz;Mapk3;Pnkp;Ciz1;Acd
GO:0098791	black	Golgi subcompartment	CC	0.0555556	216	2.09755	Ap3d1;Bsn;Dnm2;Furin;Scamp2;Trappc9;Golga2;March9;Hid1;Fam109a;Gga3;Myo18a;Adam10;Ap1b1;Ap1g1;Ap1g2;Ap1m1;Ap1m2;Ap1s1;Ap3b1;Ap3b2;Ap3s1;Ap3s2;Ap4m1;Ap4s1;Arf1;Atp7a;Atp7b;Atp8a1;Atp9a;Bet1;Bicd1;Birc6;Car4;Cdh1;Cit;Cln3;Plk3;Cpd;Crhr1;Lgr5;Fnbp1;Gcnt1;Ggta1;B4galt1;Gnas;H2-D1;H2-K1;H2-Q1;H2-Q10;H2-Q2;H2-Q4;H2-Q7;Ica1;Igf2r;Kif13a;Llgl1;Lyz2;Lyz1;M6pr;Mmp24;Myo1b;Nck1;Nck2;Slc11a2;Nsf;Ntsr2;Nucb1;…	12	Ap3d1;Bsn;Dnm2;Furin;Scamp2;Trappc9;Golga2;March9;Hid1;Fam109a;Gga3;Myo18a
GO:0032104	black	regulation of response to extracellular stimulus	BP	0.0629921	127	2.08959	Kat2a;Srebf1;Tsc2;Mapk3;Ubqln2;Ubqln4;Ehmt2;Gsk3a;Adrb2;Atg5;Atp6v0a1;Bnip3;Bnip3l;Tspo;Cck;Cln3;Csnk2a2;Ctsk;Cttn;Cyp27b1;Dcn;Epm2a;Fzd5;Gba;Gcg;Hif1a;Hmox1;Kdr;Mt3;Mtm1;Npc1;Oprm1;Sqstm1;Pafah1b2;Pikfyve;Pim2;Pip4k2a;Prkcg;Ppara;Med1;Rab12;Rab20;Rab33a;Rab33b;Rab7;Rpl28;Snai2;Sptlc2;Srebf2;Supt5;Ift88;Trim24;Trp53;U2af2;Ulk1;Vdac1;Zbtb17;Tlr2;Cartpt;Zdhhc8;Fbxw7;Nucb2;Rnf5;Npff;Sh3glb1;Ift20;Ub…	8	Kat2a;Srebf1;Tsc2;Mapk3;Ubqln2;Ubqln4;Ehmt2;Gsk3a
GO:0032107	black	regulation of response to nutrient levels	BP	0.0629921	127	2.08959	Kat2a;Srebf1;Tsc2;Mapk3;Ubqln2;Ubqln4;Ehmt2;Gsk3a;Adrb2;Atg5;Atp6v0a1;Bnip3;Bnip3l;Tspo;Cck;Cln3;Csnk2a2;Ctsk;Cttn;Cyp27b1;Dcn;Epm2a;Fzd5;Gba;Gcg;Hif1a;Hmox1;Kdr;Mt3;Mtm1;Npc1;Oprm1;Sqstm1;Pafah1b2;Pikfyve;Pim2;Pip4k2a;Prkcg;Ppara;Med1;Rab12;Rab20;Rab33a;Rab33b;Rab7;Rpl28;Snai2;Sptlc2;Srebf2;Supt5;Ift88;Trim24;Trp53;U2af2;Ulk1;Vdac1;Zbtb17;Tlr2;Cartpt;Zdhhc8;Fbxw7;Nucb2;Rnf5;Npff;Sh3glb1;Ift20;Ub…	8	Kat2a;Srebf1;Tsc2;Mapk3;Ubqln2;Ubqln4;Ehmt2;Gsk3a
GO:1901800	black	positive regulation of proteasomal protein catabolic process	BP	0.0697674	86	2.08097	Psen2;Sgta;Ubqln2;Osbpl7;Csnk1d;Rnf40;Akt1;Axin1;Cbfa2t3;Clu;Plk3;Dab2;Dvl1;Gclc;Rack1;Smad7;Mdm2;Plk1;Psen1;Pten;Rb1;Plk2;Aurka;Sumo1;Usp5;Xbp1;Arih1;Arih2;Rfwd2;Cul3;Bcap31;Csnk1e;Rnf19a;Fbxw7;Park2;Nub1;Psmd10;Ubqln1;Stub1;Socs5;Pias1;Rnf138;Gsk3b;Rnf14;Dnajb2;Herpud1;Sirt2;Anapc11;Hspbp1;Lrrk2;Socs4;Rnf125;Rchy1;Nsmce2;Ecscr;Rnf166;Dab2ip;Ube2v2;Ankib1;Bbs7;Rnf180;Fbxo22;Nkd2;Atg7;Rnf138rt1;R…	6	Psen2;Sgta;Ubqln2;Osbpl7;Csnk1d;Rnf40
GO:0014897	black	striated muscle hypertrophy	BP	0.0746269	67	2.06574	Slc9a1;Ddx39b;Cdk9;Camta2;Gsk3a;Adk;Parp1;Adrb1;Agt;Akap1;Slc25a4;Ar;Atp2a2;Col14a1;Edn1;Ezh2;G6pdx;Gata4;Gata6;Mtpn;Nr3c1;Hey2;Htr2b;Igf1;Igfbp5;Mef2c;Myoc;Nfatc3;Nr4a3;Nppb;P2rx4;Pde9a;Prkca;Ppp3ca;Prkg1;Rgs2;Ryr2;Tcap;Tiam1;Trpc3;Ttn;Wisp1;Pin1;Map2k4;Glrx3;Lmcd1;Pdlim5;Gsk3b;Mtor;Klf15;Ctdp1;Mlip;Pi16;Errfi1;Akap13;Inpp5f;Camk2d;Fdps;Myh7;Myocd;Kdm4a;Ece1;Nppa;Sorbs2;Akap6;Pde5a;Atp2b4	5	Slc9a1;Ddx39b;Cdk9;Camta2;Gsk3a
GO:0001227	black	transcriptional repressor activity, RNA polymerase II transcription regulatory region sequence-specific binding	MF	0.0596026	151	2.03868	Cux2;Zbtb7a;Nkx6-1;Tcf3;Zfpm1;Hsf4;Klf16;Cc2d1a;Mypop;Aebp1;Aebp2;Arx;Atf3;Neurog3;Bach1;Bach2;Bcl6b;Bcl6;Prdm1;Btg2;Cdx2;Crebbp;Ctcf;Dach1;Nr2f6;Bcl11a;Gata1;Gata3;Gfi1;Nkx6-2;Hdgf;Hes1;Hey1;Hhex;Hoxa2;Hsf1;Ifi203;Ifi204;Jarid2;Klf12;Mxd1;Ascl1;Mnt;Msc;Msx1;Nfatc1;Nfatc2;Nfe2l3;Nfil3;Nfkb1;Ovol1;Pax6;Ppara;Ppard;Prox1;Purb;Rela;Rest;Satb1;Spi1;Skil;Snai2;Ighmbp2;Snai1;Sp3;Srebf2;Bhlhe40;Tbx15;Tb…	9	Cux2;Zbtb7a;Nkx6-1;Tcf3;Zfpm1;Hsf4;Klf16;Cc2d1a;Mypop
GO:0046777	black	protein autophosphorylation	BP	0.0545455	220	2.03011	Ddr1;Csk;Mark2;Prkaca;Stk11;Map2k2;Mapk3;Mink1;Tnk2;Tyk2;Prkd2;Ppp2r5b;Aatk;Abl1;Abl2;Ace;Acvr1b;Alk;Atm;Bmx;Btk;Camk2a;Camk2b;Camk2g;Camk4;Ctnnd1;Cav1;Cdk5;Clk1;Clk2;Clk4;Csf1r;Csnk2a1;Dapk3;Dcx;Dyrk1a;Eef2k;Egfr;Eif2s1;Eif2ak3;Eng;Epha1;Epha4;Epha7;Epha8;Ephb3;Ephb4;Erbb2;Erbb4;Ptk2;Fer;Fes;Fgfr1;Fgfr2;Fgfr3;Fgfr4;Fgr;Flt1;Flt3;Flt4;Frk;Fyn;Gfra2;Grk5;Hck;Hk1;Hspa8;Igf1r;Irak1;Impact;Insr;Itk;J…	12	Ddr1;Csk;Mark2;Prkaca;Stk11;Map2k2;Mapk3;Mink1;Tnk2;Tyk2;Prkd2;Ppp2r5b
GO:0035249	black	synaptic transmission, glutamatergic	BP	0.0735294	68	2.02883	Grik5;Grin2d;Prkaca;Shank3;Mapk8ip2;Adcyap1;Adora1;Adora2a;Adrb2;Cacna1a;Cacnb4;Cckbr;Cdh8;Cdk5;Clcn3;Cnih2;Cnr1;Drd1;Drd2;Egfr;Glul;Gria2;Gria4;Grid2;Grik2;Grik3;Grin1;Grm1;Grm8;Htr1b;Htr2a;Mef2c;Napb;Nf1;Ngfr;Nrxn1;Ntrk1;Ntrk2;Oxtr;P2rx1;Pak1;Plat;Psen1;Ptgs2;Ptk2b;Reln;Shc3;Serpine2;Syt1;Tnr;Unc13b;Park2;Pla2g6;Lrrk2;Atad1;Slc17a7;Als2;Ophn1;Grm3;Napa;Nlgn1;Shank2;Nlgn2;Rab3gap1;Clstn3;Nlgn3;D…	5	Grik5;Grin2d;Prkaca;Shank3;Mapk8ip2
GO:0048813	black	dendrite morphogenesis	BP	0.0615385	130	2.0183	Cux2;Numbl;Stk11;Mink1;Shank3;Mapk8ip2;Anapc2;Sarm1;Abl2;Ache;Chrnb2;Neurog3;Atp7a;Cacna1a;Camk2b;Ctnna2;Cdk5;Cdk5r1;Cfl1;Cit;Cux1;Dclk1;Dcx;Dlg4;Dscam;Dvl1;Eef2k;Efna1;Epha4;Epha5;Ephb2;Ephb3;Fmn1;Fyn;Grin1;Hdac6;Hprt;Sdc2;Elavl4;Id1;Ilk;Itgb1;Lrp8;Mef2a;Met;Pias2;Map6;Nedd4;Ctnnd2;Slc11a2;Numb;Pafah1b1;Pak3;Ppp3ca;Pten;Ptprd;Ptprf;Ptprz1;Rac1;Reln;Robo1;Rock2;Sema3a;Sema4d;Sgk1;Tiam1;Trpc5;Trpc…	8	Cux2;Numbl;Stk11;Mink1;Shank3;Mapk8ip2;Anapc2;Sarm1
GO:0034702	black	ion channel complex	CC	0.0542986	221	2.01346	Cacna1c;Cacnb1;Cacnb3;Grik5;Grin2d;Hspa2;Kcnh2;Abcc8;Ttyh3;Ppp2r4;Ttyh2;Lrrc8a;Chrna1;Chrna4;Chrna7;Chrnb1;Chrnb2;Cacna1a;Cacna1b;Cacna1d;Cacna1e;Cacna2d1;Cacna2d3;Cacnb2;Cacnb4;Cacng1;Cacng2;Calm1;Calm2;Calm3;Cftr;Clcn1;Clcn2;Cnga1;Cnga2;Cnih2;Cttn;Dlg1;Dlg4;Dpp6;Eps8;Fkbp1b;Gabra3;Gabra4;Gabrb1;Gabrb3;Gabrd;Gabrg1;Gabrg2;Gabrg3;Gabrr1;Gabrr2;Glra1;Glra4;Glrb;Gria2;Gria4;Grid2;Grik2;Grin1;Grin2a…	12	Cacna1c;Cacnb1;Cacnb3;Grik5;Grin2d;Hspa2;Kcnh2;Abcc8;Ttyh3;Ppp2r4;Ttyh2;Lrrc8a
GO:0032409	black	regulation of transporter activity	BP	0.0571429	175	2.00752	Cacnb1;Cacnb3;Dnm2;Hap1;Hspa2;Slc9a1;Mink1;Jph3;Shank3;Mapk8ip2;Asic2;Chrna4;Actn2;Adrb1;Ager;Agrn;Ank3;Slc25a4;Apoa2;Arc;Atp1b1;Atp1b2;Atp1b3;Fxyd2;Bcl2;Bmp4;Cacna1d;Cacnb2;Cacnb4;Cacng2;Casq2;Cav1;Cftr;Cnih2;Crhbp;Crhr1;Ctss;Dlg4;Dmd;Drd2;Drd3;Stom;Fgf12;Fgf14;Fhl1;Fkbp1a;Fkbp1b;Gal;Galr2;Gnb5;Gsto1;Hcn1;Htt;Hk1;Hrc;Ikbkb;Ins2;Insr;Kcnab1;Kcnj11;Kcnq1;Fxyd3;Mef2c;Mmp9;Myo5a;Ntsr1;Fxyd5;Oprl1;Op…	10	Cacnb1;Cacnb3;Dnm2;Hap1;Hspa2;Slc9a1;Mink1;Jph3;Shank3;Mapk8ip2
GO:0000786	blue	nucleosome	CC	0.39726	73	15.0234	H3f3a;Hist1h2bc;Hist1h4h;Hist3h2ba;Hist1h3g;H2afj;Hist1h3f;Hist1h3e;Hist1h3h;Hist1h3i;Hist2h3b;Hist1h4c;Hist1h4d;Hist1h4f;Hist1h4i;Hist1h4j;Hist1h4k;Hist1h4n;Hist1h2ak;Hist1h2af;Hist2h2ac;Hist1h2ba;Hist1h2bg;Hist1h2bh;Hist1h2bj;Hist1h2bl;Hist1h2bn;Hist1h4a;Hist1h4b;Cenpa;Hist1h1d;H1f0;Hist2h3c1;H3f3b;H2afx;Hp1bp3;Irf4;Tcf3;H2afy;Hist1h1c;Hist1h1e;H2afz;Kat6b;Hist1h1b;Hypm;Mphosph8;H2afv;Hist1h1a;…	29	H3f3a;Hist1h2bc;Hist1h4h;Hist3h2ba;Hist1h3g;H2afj;Hist1h3f;Hist1h3e;Hist1h3h;Hist1h3i;Hist2h3b;Hist1h4c;Hist1h4d;Hist1h4f;Hist1h4i;Hist1h4j;Hist1h4k;Hist1h4n;Hist1h2ak;Hist1h2af;Hist2h2ac;Hist1h2ba;Hist1h2bg;Hist1h2bh;Hist1h2bj;Hist1h2bl;Hist1h2bn;Hist1h4a;Hist1h4b
GO:0044815	blue	DNA packaging complex	CC	0.367089	79	14.3013	H3f3a;Hist1h2bc;Hist1h4h;Hist3h2ba;Hist1h3g;H2afj;Hist1h3f;Hist1h3e;Hist1h3h;Hist1h3i;Hist2h3b;Hist1h4c;Hist1h4d;Hist1h4f;Hist1h4i;Hist1h4j;Hist1h4k;Hist1h4n;Hist1h2ak;Hist1h2af;Hist2h2ac;Hist1h2ba;Hist1h2bg;Hist1h2bh;Hist1h2bj;Hist1h2bl;Hist1h2bn;Hist1h4a;Hist1h4b;Cenpa;Smc2;Hist1h1d;H1f0;Hist2h3c1;H3f3b;H2afx;Hp1bp3;Irf4;Tcf3;H2afy;Hist1h1c;Hist1h1e;H2afz;Kat6b;Ncapg;Hist1h1b;Hypm;Ncapd2;Smc4;M…	29	H3f3a;Hist1h2bc;Hist1h4h;Hist3h2ba;Hist1h3g;H2afj;Hist1h3f;Hist1h3e;Hist1h3h;Hist1h3i;Hist2h3b;Hist1h4c;Hist1h4d;Hist1h4f;Hist1h4i;Hist1h4j;Hist1h4k;Hist1h4n;Hist1h2ak;Hist1h2af;Hist2h2ac;Hist1h2ba;Hist1h2bg;Hist1h2bh;Hist1h2bj;Hist1h2bl;Hist1h2bn;Hist1h4a;Hist1h4b
GO:0098803	blue	respiratory chain complex	CC	0.403509	57	13.5028	Cox6a1;Cox8a;Ndufa2;Sdhc;Ndufb9;Ndufc1;Ndufa12;Ndufa7;Ndufb7;Ndufa6;Ndufa13;Ndufb8;Sdhb;Ndufc2;Ndufb2;Ndufb10;Ndufs3;Ndufa11;Ndufs7;Uqcc3;Ndufs8;Ndufb6;Ndufs6;Cox4i1;Cox5a;Cox6a2;COX1;CYTB;Ndufa4;Ndufs4;Ndufv1;Uqcrc1;Ndufa1;Park7;Ndufb5;Ndufa3;Ndufa9;Cox7b;Uqcr10;Ndufb3;Uqcrh;Uqcrfs1;Uqcrc2;Ndufa10;Uqcrb;Ndufb4;Ndufa5;Ndufa8;Ndufab1;Ndufv2;Pmpcb;Ndufv3;Cox4i2;Ndufb11;Ndufs2;Ndufs1;Foxred1	23	Cox6a1;Cox8a;Ndufa2;Sdhc;Ndufb9;Ndufc1;Ndufa12;Ndufa7;Ndufb7;Ndufa6;Ndufa13;Ndufb8;Sdhb;Ndufc2;Ndufb2;Ndufb10;Ndufs3;Ndufa11;Ndufs7;Uqcc3;Ndufs8;Ndufb6;Ndufs6
GO:0005747	blue	mitochondrial respiratory chain complex I	CC	0.486486	37	13.3728	Ndufa2;Ndufb9;Ndufc1;Ndufa12;Ndufa7;Ndufb7;Ndufa6;Ndufa13;Ndufb8;Ndufc2;Ndufb2;Ndufb10;Ndufs3;Ndufa11;Ndufs7;Ndufs8;Ndufb6;Ndufs6;Ndufs4;Ndufv1;Ndufa1;Park7;Ndufb5;Ndufa3;Ndufa9;Ndufb3;Ndufa10;Ndufb4;Ndufa5;Ndufa8;Ndufab1;Ndufv2;Ndufv3;Ndufb11;Ndufs2;Ndufs1;Foxred1	18	Ndufa2;Ndufb9;Ndufc1;Ndufa12;Ndufa7;Ndufb7;Ndufa6;Ndufa13;Ndufb8;Ndufc2;Ndufb2;Ndufb10;Ndufs3;Ndufa11;Ndufs7;Ndufs8;Ndufb6;Ndufs6
GO:0030964	blue	NADH dehydrogenase complex	CC	0.486486	37	13.3728	Ndufa2;Ndufb9;Ndufc1;Ndufa12;Ndufa7;Ndufb7;Ndufa6;Ndufa13;Ndufb8;Ndufc2;Ndufb2;Ndufb10;Ndufs3;Ndufa11;Ndufs7;Ndufs8;Ndufb6;Ndufs6;Ndufs4;Ndufv1;Ndufa1;Park7;Ndufb5;Ndufa3;Ndufa9;Ndufb3;Ndufa10;Ndufb4;Ndufa5;Ndufa8;Ndufab1;Ndufv2;Ndufv3;Ndufb11;Ndufs2;Ndufs1;Foxred1	18	Ndufa2;Ndufb9;Ndufc1;Ndufa12;Ndufa7;Ndufb7;Ndufa6;Ndufa13;Ndufb8;Ndufc2;Ndufb2;Ndufb10;Ndufs3;Ndufa11;Ndufs7;Ndufs8;Ndufb6;Ndufs6
GO:0045271	blue	respiratory chain complex I	CC	0.486486	37	13.3728	Ndufa2;Ndufb9;Ndufc1;Ndufa12;Ndufa7;Ndufb7;Ndufa6;Ndufa13;Ndufb8;Ndufc2;Ndufb2;Ndufb10;Ndufs3;Ndufa11;Ndufs7;Ndufs8;Ndufb6;Ndufs6;Ndufs4;Ndufv1;Ndufa1;Park7;Ndufb5;Ndufa3;Ndufa9;Ndufb3;Ndufa10;Ndufb4;Ndufa5;Ndufa8;Ndufab1;Ndufv2;Ndufv3;Ndufb11;Ndufs2;Ndufs1;Foxred1	18	Ndufa2;Ndufb9;Ndufc1;Ndufa12;Ndufa7;Ndufb7;Ndufa6;Ndufa13;Ndufb8;Ndufc2;Ndufb2;Ndufb10;Ndufs3;Ndufa11;Ndufs7;Ndufs8;Ndufb6;Ndufs6
GO:0005746	blue	mitochondrial respiratory chain	CC	0.389831	59	13.2177	Cox6a1;Cox8a;Ndufa2;Sdhc;Ndufb9;Ndufc1;Ndufa12;Ndufa7;Ndufb7;Ndufa6;Ndufa13;Ndufb8;Sdhb;Ndufc2;Ndufb2;Ndufb10;Ndufs3;Ndufa11;Ndufs7;Uqcc3;Ndufs8;Ndufb6;Ndufs6;Cox4i1;Cox5a;Cox6a2;Cox7a1;Cox7a2;COX1;Ndufa4;Ndufs4;Ndufv1;Cox7a2l;Uqcrc1;Ndufa1;Park7;Ndufb5;Ndufa3;Ndufa9;Cox7b;Uqcr10;Ndufb3;Uqcrh;Uqcrfs1;Uqcrc2;Ndufa10;Uqcrb;Ndufb4;Ndufa5;Ndufa8;Ndufab1;Ndufv2;Pmpcb;Ndufv3;Cox4i2;Ndufb11;Ndufs2;Ndufs…	23	Cox6a1;Cox8a;Ndufa2;Sdhc;Ndufb9;Ndufc1;Ndufa12;Ndufa7;Ndufb7;Ndufa6;Ndufa13;Ndufb8;Sdhb;Ndufc2;Ndufb2;Ndufb10;Ndufs3;Ndufa11;Ndufs7;Uqcc3;Ndufs8;Ndufb6;Ndufs6
GO:0070469	blue	respiratory chain	CC	0.351351	74	13.168	Cox6a1;Cox8a;Ndufa2;Uqcrq;Sdhc;Ndufb9;Ndufc1;Ndufa12;Ndufa7;Uqcr11;Ndufb7;Ndufa6;Ndufa13;Ndufb8;Sdhb;Ndufc2;Ndufb2;Ndufb10;Ndufs3;Ndufa11;Ndufs7;Uqcc3;Ndufs8;Ndufb6;Ndufs6;Ndufs5;Cox4i1;Cox5a;Cox6a2;Cox7a1;Cox7a2;Cyct;COX1;COX2;CYTB;ND1;ND2;ND3;ND4;ND4L;ND5;ND6;Ndufa4;Ndufs4;Ndufv1;Cox7a2l;Uqcrc1;Ndufa1;Higd1a;Park7;Ndufb5;Ndufa3;Ndufa9;Cox7b;Uqcr10;Cyc1;Ndufb3;Uqcrh;Uqcrfs1;Uqcrc2;Ndufa10;Uqcrb;…	26	Cox6a1;Cox8a;Ndufa2;Uqcrq;Sdhc;Ndufb9;Ndufc1;Ndufa12;Ndufa7;Uqcr11;Ndufb7;Ndufa6;Ndufa13;Ndufb8;Sdhb;Ndufc2;Ndufb2;Ndufb10;Ndufs3;Ndufa11;Ndufs7;Uqcc3;Ndufs8;Ndufb6;Ndufs6;Ndufs5
GO:0098800	blue	inner mitochondrial membrane protein complex	CC	0.311828	93	12.8792	Cox6a1;Cox8a;Ndufa2;Timm17b;Atp5l;Timm23;Sdhc;Chchd6;Ndufb9;Ndufc1;Ndufa12;Ndufa7;Ndufb7;Atp5e;Ndufa6;Ndufa13;Ndufb8;Sdhb;Ndufc2;Ndufb2;Ndufb10;Ndufs3;Smdt1;Ndufa11;Ndufs7;Uqcc3;Ndufs8;Ndufb6;Ndufs6;Atp5a1;Atp5b;Atp5c1;Atp5f1;Atp5g1;Atp5j;Atp5k;Atpif1;Cox4i1;Cox5a;Cox6a2;ATP8;COX1;Ndufa4;Ndufs4;Ndufv1;Cox7a2l;Timm17a;Uqcrc1;Atp5o;Timm9;Ndufa1;Timm22;Park7;Atp5j2;Atp5d;Ndufb5;Chchd3;Ndufa3;Ndufa9;…	29	Cox6a1;Cox8a;Ndufa2;Timm17b;Atp5l;Timm23;Sdhc;Chchd6;Ndufb9;Ndufc1;Ndufa12;Ndufa7;Ndufb7;Atp5e;Ndufa6;Ndufa13;Ndufb8;Sdhb;Ndufc2;Ndufb2;Ndufb10;Ndufs3;Smdt1;Ndufa11;Ndufs7;Uqcc3;Ndufs8;Ndufb6;Ndufs6
GO:0098798	blue	mitochondrial protein complex	CC	0.267717	127	12.5966	Bax;Cox6a1;Cox8a;Timm10b;Ndufa2;Timm17b;Atp5l;Timm23;Sdhc;Chchd6;Tomm6;Mrps36;Ndufb9;Ndufc1;Ndufa12;Ndufa7;Ndufb7;Atp5e;Ndufa6;Ndufa13;Ndufb8;Sdhb;Ndufc2;Ndufb2;Ndufb10;Ndufs3;Tomm5;Smdt1;Ndufa11;Ndufs7;Uqcc3;Ndufs8;Ndufb6;Ndufs6;Atp5a1;Atp5b;Atp5c1;Atp5f1;Atp5g1;Atp5j;Atp5k;Atpif1;Bckdha;Bckdhb;Bckdk;Cox4i1;Cox5a;Cox6a2;ATP8;COX1;Ndufa4;Ndufs4;Ndufv1;Pdk2;Polg;Cox7a2l;Suclg2;Timm17a;Uqcrc1;Atp5o…	34	Bax;Cox6a1;Cox8a;Timm10b;Ndufa2;Timm17b;Atp5l;Timm23;Sdhc;Chchd6;Tomm6;Mrps36;Ndufb9;Ndufc1;Ndufa12;Ndufa7;Ndufb7;Atp5e;Ndufa6;Ndufa13;Ndufb8;Sdhb;Ndufc2;Ndufb2;Ndufb10;Ndufs3;Tomm5;Smdt1;Ndufa11;Ndufs7;Uqcc3;Ndufs8;Ndufb6;Ndufs6
GO:0006335	blue	DNA replication-dependent nucleosome assembly	BP	0.483871	31	12.1663	Hist1h4h;Hist1h3g;Hist1h3e;Hist1h3h;Hist1h3i;Hist2h3b;Hist1h4c;Hist1h4d;Hist1h4f;Hist1h4i;Hist1h4j;Hist1h4k;Hist1h4n;Hist1h4a;Hist1h4b;Hist2h3c1;Rbbp4;Chaf1a;Nasp;Asf1a;Asf1b;Ipo4;Hist2h3c2;Hist2h4;Hat1;Chaf1b;Hist1h3d;Hist1h3b;Hist4h4;Hist1h3a;Hist1h4m	15	Hist1h4h;Hist1h3g;Hist1h3e;Hist1h3h;Hist1h3i;Hist2h3b;Hist1h4c;Hist1h4d;Hist1h4f;Hist1h4i;Hist1h4j;Hist1h4k;Hist1h4n;Hist1h4a;Hist1h4b
GO:0034723	blue	DNA replication-dependent nucleosome organization	BP	0.483871	31	12.1663	Hist1h4h;Hist1h3g;Hist1h3e;Hist1h3h;Hist1h3i;Hist2h3b;Hist1h4c;Hist1h4d;Hist1h4f;Hist1h4i;Hist1h4j;Hist1h4k;Hist1h4n;Hist1h4a;Hist1h4b;Hist2h3c1;Rbbp4;Chaf1a;Nasp;Asf1a;Asf1b;Ipo4;Hist2h3c2;Hist2h4;Hat1;Chaf1b;Hist1h3d;Hist1h3b;Hist4h4;Hist1h3a;Hist1h4m	15	Hist1h4h;Hist1h3g;Hist1h3e;Hist1h3h;Hist1h3i;Hist2h3b;Hist1h4c;Hist1h4d;Hist1h4f;Hist1h4i;Hist1h4j;Hist1h4k;Hist1h4n;Hist1h4a;Hist1h4b
GO:0045653	blue	negative regulation of megakaryocyte differentiation	BP	0.588235	17	11.136	Hist1h4h;Hist1h4c;Hist1h4d;Hist1h4f;Hist1h4i;Hist1h4j;Hist1h4k;Hist1h4n;Hist1h4a;Hist1h4b;Gabpa;Prmt1;Cib1;Pf4;Hist2h4;Hist4h4;Hist1h4m	10	Hist1h4h;Hist1h4c;Hist1h4d;Hist1h4f;Hist1h4i;Hist1h4j;Hist1h4k;Hist1h4n;Hist1h4a;Hist1h4b
GO:0000788	blue	nuclear nucleosome	CC	0.4375	32	11.0621	H3f3a;Hist1h2bc;Hist3h2ba;Hist1h3g;Hist1h3e;Hist1h3h;Hist1h3i;Hist2h3b;Hist1h2ba;Hist1h2bg;Hist1h2bh;Hist1h2bj;Hist1h2bl;Hist1h2bn;Hist2h3c1;H3f3b;Irf4;Tcf3;Mphosph8;Hist2h3c2;Hist1h3d;Hist1h3b;Hist3h2a;Hist1h2bb;Hist1h2be;Hist1h2bf;Hist1h2bk;Hist1h2bm;Hist1h2bp;Hist2h2bb;Hist2h2be;Hist1h3a	14	H3f3a;Hist1h2bc;Hist3h2ba;Hist1h3g;Hist1h3e;Hist1h3h;Hist1h3i;Hist2h3b;Hist1h2ba;Hist1h2bg;Hist1h2bh;Hist1h2bj;Hist1h2bl;Hist1h2bn
GO:0044455	blue	mitochondrial membrane part	CC	0.218543	151	10.7419	Cox6a1;Cox8a;Fdx1;Ndufa2;Timm17b;Atp5l;Timm23;Sdhc;Chchd6;Tomm6;Ndufb9;Ndufc1;Ndufa12;Ndufa7;Ndufb7;Atp5e;Ndufa6;Ndufa13;Ndufb8;Sdhb;Ndufc2;Ndufb2;Ndufb10;Ndufs3;Tomm5;Smdt1;Oxa1l;Ndufa11;Ndufs7;Uqcc3;Ndufs8;Ndufb6;Ndufs6;Akap1;Atp5a1;Atp5b;Atp5c1;Atp5f1;Atp5g1;Atp5j;Atp5k;Atpif1;Bak1;Bdnf;Bid;Bnip3;Cox4i1;Cox5a;Cox6a2;Cox7a1;Cox7a2;Cpt1a;Dmpk;Gdap1;Hspd1;Lyn;ATP8;COX1;Ndufa4;Ndufs4;Ndufv1;Phb;Pp…	33	Cox6a1;Cox8a;Fdx1;Ndufa2;Timm17b;Atp5l;Timm23;Sdhc;Chchd6;Tomm6;Ndufb9;Ndufc1;Ndufa12;Ndufa7;Ndufb7;Atp5e;Ndufa6;Ndufa13;Ndufb8;Sdhb;Ndufc2;Ndufb2;Ndufb10;Ndufs3;Tomm5;Smdt1;Oxa1l;Ndufa11;Ndufs7;Uqcc3;Ndufs8;Ndufb6;Ndufs6
GO:0032993	blue	protein-DNA complex	CC	0.224638	138	10.6208	H3f3a;Jund;Hist1h2bc;Hist1h4h;Ten1;Hist3h2ba;Hist1h3g;H2afj;Hist1h3f;Hist1h3e;Hist1h3h;Hist1h3i;Hist2h3b;Hist1h4c;Hist1h4d;Hist1h4f;Hist1h4i;Hist1h4j;Hist1h4k;Hist1h4n;Hist1h2ak;Hist1h2af;Hist2h2ac;Hist1h2ba;Hist1h2bg;Hist1h2bh;Hist1h2bj;Hist1h2bl;Hist1h2bn;Hist1h4a;Hist1h4b;Ctnnb1;Cdc45;Cenpa;Atf6b;Ddit3;Eya1;Hist1h1d;H1f0;Hist2h3c1;H3f3b;Hhex;H2afx;Hnrnpk;Hp1bp3;Irf4;Jup;Lef1;Nfe2l2;Nfya;Nfyb;N…	31	H3f3a;Jund;Hist1h2bc;Hist1h4h;Ten1;Hist3h2ba;Hist1h3g;H2afj;Hist1h3f;Hist1h3e;Hist1h3h;Hist1h3i;Hist2h3b;Hist1h4c;Hist1h4d;Hist1h4f;Hist1h4i;Hist1h4j;Hist1h4k;Hist1h4n;Hist1h2ak;Hist1h2af;Hist2h2ac;Hist1h2ba;Hist1h2bg;Hist1h2bh;Hist1h2bj;Hist1h2bl;Hist1h2bn;Hist1h4a;Hist1h4b
GO:0051290	blue	protein heterotetramerization	BP	0.375	40	10.4126	Hist1h4h;Hist1h3g;Hist1h3e;Hist1h3h;Hist1h3i;Hist2h3b;Hist1h4c;Hist1h4d;Hist1h4f;Hist1h4i;Hist1h4j;Hist1h4k;Hist1h4n;Hist1h4a;Hist1h4b;Agrn;Aldoc;Anxa2;Cnga2;Xrcc6;Hist2h3c1;Insr;Nrxn1;Rrm1;Rrm2;S100a10;Pdss1;Pdss2;Nupl1;Hist2h3c2;Hist2h4;Nlgn1;Lrp4;Cnga4;Nup54;Hist1h3d;Hist1h3b;Hist4h4;Hist1h3a;Hist1h4m	15	Hist1h4h;Hist1h3g;Hist1h3e;Hist1h3h;Hist1h3i;Hist2h3b;Hist1h4c;Hist1h4d;Hist1h4f;Hist1h4i;Hist1h4j;Hist1h4k;Hist1h4n;Hist1h4a;Hist1h4b
GO:0006334	blue	nucleosome assembly	BP	0.258065	93	10.3067	Hist1h2bc;Hist1h4h;Hist3h2ba;Hist1h3g;Hist1h3f;Hist1h3e;Hist1h3h;Hist1h3i;Hist2h3b;Hist1h4c;Hist1h4d;Hist1h4f;Hist1h4i;Hist1h4j;Hist1h4k;Hist1h4n;Hist1h2ba;Hist1h2bg;Hist1h2bh;Hist1h2bj;Hist1h2bl;Hist1h2bn;Hist1h4a;Hist1h4b;Daxx;Brd2;Hist1h1d;H1f0;Hist2h3c1;Hira;Hp1bp3;Mcm2;Nap1l2;Nap1l4;Npm1;Rbbp4;Smarca4;Sox9;Tspyl1;Atrx;H2afy;Chaf1a;Hist1h1c;Hist1h1e;Nasp;Tspyl2;Nap1l1;Sart3;Kat6b;Nap1l3;Set;H…	24	Hist1h2bc;Hist1h4h;Hist3h2ba;Hist1h3g;Hist1h3f;Hist1h3e;Hist1h3h;Hist1h3i;Hist2h3b;Hist1h4c;Hist1h4d;Hist1h4f;Hist1h4i;Hist1h4j;Hist1h4k;Hist1h4n;Hist1h2ba;Hist1h2bg;Hist1h2bh;Hist1h2bj;Hist1h2bl;Hist1h2bn;Hist1h4a;Hist1h4b
GO:0031497	blue	chromatin assembly	BP	0.242991	107	10.2859	Cdkn2a;Hist1h2bc;Hist1h4h;Cenpv;Hist3h2ba;Hist1h3g;Hist1h3f;Hist1h3e;Hist1h3h;Hist1h3i;Hist2h3b;Hist1h4c;Hist1h4d;Hist1h4f;Hist1h4i;Hist1h4j;Hist1h4k;Hist1h4n;Hist1h2ba;Hist1h2bg;Hist1h2bh;Hist1h2bj;Hist1h2bl;Hist1h2bn;Hist1h4a;Hist1h4b;Ctcf;Daxx;Brd2;Hist1h1d;H1f0;Hist2h3c1;Hells;Hira;Hp1bp3;Mcm2;Nap1l2;Nap1l4;Npm1;Rbbp4;Smarca4;Sox9;Trp53;Tspyl1;Atrx;H2afy;Chaf1a;Hist1h1c;Hist1h1e;Nasp;Tspyl2;N…	26	Cdkn2a;Hist1h2bc;Hist1h4h;Cenpv;Hist3h2ba;Hist1h3g;Hist1h3f;Hist1h3e;Hist1h3h;Hist1h3i;Hist2h3b;Hist1h4c;Hist1h4d;Hist1h4f;Hist1h4i;Hist1h4j;Hist1h4k;Hist1h4n;Hist1h2ba;Hist1h2bg;Hist1h2bh;Hist1h2bj;Hist1h2bl;Hist1h2bn;Hist1h4a;Hist1h4b
GO:0000313	blue	organellar ribosome	CC	0.283784	74	10.2858	Mrpl23;Mrpl17;Mrps7;Mrpl12;Mrps24;Mrps36;Mrps28;Ndufa7;Mrpl42;Mrpl46;Mrpl57;Mrps11;Ict1;Mrpl28;Mrpl27;Mrpl34;Mrpl36;Mrpl43;Gadd45gip1;Mrps6;Mrpl22;Mrpl40;Mrpl49;Mrps12;Mrpl39;Mrpl15;Mrpl2;Mrpl48;Mtg2;Mrpl37;Mrpl19;Mrps31;Mrpl38;Mrps22;Mrps23;Mrps10;Mrps25;Mrps14;Dap3;Mrps16;Mrps17;Mrps21;Mrps15;Mrpl11;Mrpl20;Mrpl51;Mrpl33;Mrps18b;Mrpl13;Mrps18a;Mrps18c;Mrps9;Mterf4;Nsun4;2810006K23Rik;Mrpl47;Mrpl…	21	Mrpl23;Mrpl17;Mrps7;Mrpl12;Mrps24;Mrps36;Mrps28;Ndufa7;Mrpl42;Mrpl46;Mrpl57;Mrps11;Ict1;Mrpl28;Mrpl27;Mrpl34;Mrpl36;Mrpl43;Gadd45gip1;Mrps6;Mrpl22
GO:0005761	blue	mitochondrial ribosome	CC	0.283784	74	10.2858	Mrpl23;Mrpl17;Mrps7;Mrpl12;Mrps24;Mrps36;Mrps28;Ndufa7;Mrpl42;Mrpl46;Mrpl57;Mrps11;Ict1;Mrpl28;Mrpl27;Mrpl34;Mrpl36;Mrpl43;Gadd45gip1;Mrps6;Mrpl22;Mrpl40;Mrpl49;Mrps12;Mrpl39;Mrpl15;Mrpl2;Mrpl48;Mtg2;Mrpl37;Mrpl19;Mrps31;Mrpl38;Mrps22;Mrps23;Mrps10;Mrps25;Mrps14;Dap3;Mrps16;Mrps17;Mrps21;Mrps15;Mrpl11;Mrpl20;Mrpl51;Mrpl33;Mrps18b;Mrpl13;Mrps18a;Mrps18c;Mrps9;Mterf4;Nsun4;2810006K23Rik;Mrpl47;Mrpl…	21	Mrpl23;Mrpl17;Mrps7;Mrpl12;Mrps24;Mrps36;Mrps28;Ndufa7;Mrpl42;Mrpl46;Mrpl57;Mrps11;Ict1;Mrpl28;Mrpl27;Mrpl34;Mrpl36;Mrpl43;Gadd45gip1;Mrps6;Mrpl22
GO:1990204	blue	oxidoreductase complex	CC	0.261905	84	9.9673	Ndufa2;Sdhc;Mrps36;Ndufb9;Ndufc1;Ndufa12;Ndufa7;Ndufb7;Ndufa6;Ndufa13;Ndufb8;Sdhb;Ndufc2;Ndufb2;Ndufb10;Ndufs3;Ndufa11;Ndufs7;Uqcc3;Ndufs8;Ndufb6;Ndufs6;Bckdha;Bckdhb;Bckdk;Cyba;Cybb;Dld;Gpd1;Gpd2;CYTB;Ncf1;Ncf4;Ndufs4;Ndufv1;Ogdh;P4ha1;P4ha2;P4hb;Pdha1;Pdk2;Rrm1;Rrm2;Uqcrc1;Pdhx;Nox4;Ndufa1;Park7;Ndufb5;Ndufa3;Ndufa9;Uqcr10;Gmpr;Ndufb3;Uqcrh;Uqcrfs1;Uqcrc2;Ndufa10;Uqcrb;Gcsh;Ndufb4;Ndufa5;Pdhb;N…	22	Ndufa2;Sdhc;Mrps36;Ndufb9;Ndufc1;Ndufa12;Ndufa7;Ndufb7;Ndufa6;Ndufa13;Ndufb8;Sdhb;Ndufc2;Ndufb2;Ndufb10;Ndufs3;Ndufa11;Ndufs7;Uqcc3;Ndufs8;Ndufb6;Ndufs6
GO:1901533	blue	negative regulation of hematopoietic progenitor cell differentiation	BP	0.47619	21	9.83631	Hist1h4h;Hist1h4c;Hist1h4d;Hist1h4f;Hist1h4i;Hist1h4j;Hist1h4k;Hist1h4n;Hist1h4a;Hist1h4b;Gabpa;Hes1;Prmt1;Nfe2l2;Notch1;Cib1;Pf4;Hist2h4;Hist4h4;N4bp2l2;Hist1h4m	10	Hist1h4h;Hist1h4c;Hist1h4d;Hist1h4f;Hist1h4i;Hist1h4j;Hist1h4k;Hist1h4n;Hist1h4a;Hist1h4b
GO:0005840	blue	ribosome	CC	0.178744	207	9.74726	Mrpl23;Rps29;Mrpl17;Mrps7;Rpl36;Rplp1;Mrpl12;Rps27;Repin1;Mrps24;Mrpl54;Mrps36;Rps4l;Mrps28;Ndufa7;Rps10;Rplp2;Mrpl55;Mrpl42;Mrpl46;Mrpl57;Mrps11;Rps13;Mrpl14;Mrpl53;Ict1;Mrpl28;Mrpl52;Mrpl27;Mrpl34;Mrpl36;Mrpl43;Gadd45gip1;Hba-a2;Mrps6;Mrpl22;Gm5218;Apod;Rplp0;Canx;Ddx3x;Eef2;Eif2s1;Fau;Mrps33;Rack1;Hba-a1;Elavl4;Rpsa;Eif2d;Rps2;Nck1;Mrpl40;Mrpl49;Npm1;Ppargc1a;Rbm3;Rpl10a;Rpl18;Rpl19;Rpl21;Rpl2…	37	Mrpl23;Rps29;Mrpl17;Mrps7;Rpl36;Rplp1;Mrpl12;Rps27;Repin1;Mrps24;Mrpl54;Mrps36;Rps4l;Mrps28;Ndufa7;Rps10;Rplp2;Mrpl55;Mrpl42;Mrpl46;Mrpl57;Mrps11;Rps13;Mrpl14;Mrpl53;Ict1;Mrpl28;Mrpl52;Mrpl27;Mrpl34;Mrpl36;Mrpl43;Gadd45gip1;Hba-a2;Mrps6;Mrpl22;Gm5218
GO:0016655	blue	oxidoreductase activity, acting on NAD(P)H, quinone or similar compound as acceptor	MF	0.371429	35	9.63399	Cbr1;Ndufa2;Dhrs4;Ndufb9;Ndufa12;Ndufa7;Ndufb7;Ndufa13;Ndufb8;Ndufc2;Ndufs3;Ndufs7;Ndufs8;Cryz;ND1;ND2;ND3;ND4;ND4L;ND5;ND6;Ndufs4;Ndufv1;Nqo1;Adh4;Ndufa10;Dcxr;Ndufa5;Ndufaf1;Ndufv2;Ndufaf2;Akr1c21;Ndufs2;Ndufs1;Cbr4	13	Cbr1;Ndufa2;Dhrs4;Ndufb9;Ndufa12;Ndufa7;Ndufb7;Ndufa13;Ndufb8;Ndufc2;Ndufs3;Ndufs7;Ndufs8
GO:0008137	blue	NADH dehydrogenase (ubiquinone) activity	MF	0.407407	27	9.38542	Ndufa2;Ndufb9;Ndufa12;Ndufa7;Ndufb7;Ndufa13;Ndufb8;Ndufc2;Ndufs3;Ndufs7;Ndufs8;ND1;ND2;ND3;ND4;ND4L;ND5;ND6;Ndufs4;Ndufv1;Ndufa10;Ndufa5;Ndufaf1;Ndufv2;Ndufaf2;Ndufs2;Ndufs1	11	Ndufa2;Ndufb9;Ndufa12;Ndufa7;Ndufb7;Ndufa13;Ndufb8;Ndufc2;Ndufs3;Ndufs7;Ndufs8
GO:0050136	blue	NADH dehydrogenase (quinone) activity	MF	0.407407	27	9.38542	Ndufa2;Ndufb9;Ndufa12;Ndufa7;Ndufb7;Ndufa13;Ndufb8;Ndufc2;Ndufs3;Ndufs7;Ndufs8;ND1;ND2;ND3;ND4;ND4L;ND5;ND6;Ndufs4;Ndufv1;Ndufa10;Ndufa5;Ndufaf1;Ndufv2;Ndufaf2;Ndufs2;Ndufs1	11	Ndufa2;Ndufb9;Ndufa12;Ndufa7;Ndufb7;Ndufa13;Ndufb8;Ndufc2;Ndufs3;Ndufs7;Ndufs8
GO:0005743	blue	mitochondrial inner membrane	CC	0.139037	374	9.32539	Coq7;Cox6a1;Cox8a;Fdx1;Timm10b;Ndufa2;Timm17b;Uqcrq;Capn10;Slc27a1;Mrpl17;Atp5l;Timm13;Timm23;Mtch1;Sdhc;Chchd6;Ndufb9;Ndufc1;Ndufa12;Ndufa7;Uqcr11;Ndufaf3;Ndufb7;Romo1;Atp5e;Ndufa6;Ndufa13;Ndufb8;Uqcc2;Sdhb;Dnajc19;Ndufc2;Ndufb2;Ndufb10;Ndufs3;Smdt1;Oxa1l;Tmem256;Ndufa11;Mpc2;Coq2;Ndufs7;Uqcc3;Rhbdl1;Ndufs8;Ndufb6;Parl;Ndufs6;Ndufs5;Gpx4;Sco2;Abcb7;Acadvl;Ak2;Akap1;Alas2;Aldh3a2;Slc25a4;Slc25a5;…	52	Coq7;Cox6a1;Cox8a;Fdx1;Timm10b;Ndufa2;Timm17b;Uqcrq;Capn10;Slc27a1;Mrpl17;Atp5l;Timm13;Timm23;Mtch1;Sdhc;Chchd6;Ndufb9;Ndufc1;Ndufa12;Ndufa7;Uqcr11;Ndufaf3;Ndufb7;Romo1;Atp5e;Ndufa6;Ndufa13;Ndufb8;Uqcc2;Sdhb;Dnajc19;Ndufc2;Ndufb2;Ndufb10;Ndufs3;Smdt1;Oxa1l;Tmem256;Ndufa11;Mpc2;Coq2;Ndufs7;Uqcc3;Rhbdl1;Ndufs8;Ndufb6;Parl;Ndufs6;Ndufs5;Gpx4;Sco2
GO:0034728	blue	nucleosome organization	BP	0.217391	115	9.30306	Hist1h2bc;Hist1h4h;Znhit1;Hist3h2ba;Hist1h3g;Hist1h3f;Hist1h3e;Hist1h3h;Hist1h3i;Hist2h3b;Hist1h4c;Hist1h4d;Hist1h4f;Hist1h4i;Hist1h4j;Hist1h4k;Hist1h4n;Hist1h2ba;Hist1h2bg;Hist1h2bh;Hist1h2bj;Hist1h2bl;Hist1h2bn;Hist1h4a;Hist1h4b;Cebpg;Ctcf;Daxx;Brd2;Hist1h1d;H1f0;Hist2h3c1;Hira;Hp1bp3;Mcm2;Nap1l2;Nap1l4;Npm1;Ptma;Rbbp4;Smarca4;Smarcb1;Smarcc1;Sox9;Sycp3;Vps72;Tspyl1;Atrx;H2afy;Chaf1a;Hist1h1c;H…	25	Hist1h2bc;Hist1h4h;Znhit1;Hist3h2ba;Hist1h3g;Hist1h3f;Hist1h3e;Hist1h3h;Hist1h3i;Hist2h3b;Hist1h4c;Hist1h4d;Hist1h4f;Hist1h4i;Hist1h4j;Hist1h4k;Hist1h4n;Hist1h2ba;Hist1h2bg;Hist1h2bh;Hist1h2bj;Hist1h2bl;Hist1h2bn;Hist1h4a;Hist1h4b
GO:0006323	blue	DNA packaging	BP	0.198582	141	9.19933	Cdkn2a;H3f3a;Hist1h2bc;Hist1h4h;Cenpv;Hist3h2ba;Tssk6;Hist1h3g;Hist1h3f;Hist1h3e;Hist1h3h;Hist1h3i;Hist2h3b;Hist1h4c;Hist1h4d;Hist1h4f;Hist1h4i;Hist1h4j;Hist1h4k;Hist1h4n;Hist1h2ba;Hist1h2bg;Hist1h2bh;Hist1h2bj;Hist1h2bl;Hist1h2bn;Hist1h4a;Hist1h4b;Cdk1;Ctcf;Daxx;Dffb;Smc2;Brd2;Hist1h1d;H1f0;Hist2h3c1;H3f3b;Hells;Hira;Hmga2;Hp1bp3;Mcm2;Nap1l2;Nap1l4;Npm1;Rbbp4;Smarca4;Smarcc1;Sox9;Suv39h1;Sycp1;S…	28	Cdkn2a;H3f3a;Hist1h2bc;Hist1h4h;Cenpv;Hist3h2ba;Tssk6;Hist1h3g;Hist1h3f;Hist1h3e;Hist1h3h;Hist1h3i;Hist2h3b;Hist1h4c;Hist1h4d;Hist1h4f;Hist1h4i;Hist1h4j;Hist1h4k;Hist1h4n;Hist1h2ba;Hist1h2bg;Hist1h2bh;Hist1h2bj;Hist1h2bl;Hist1h2bn;Hist1h4a;Hist1h4b
GO:0003954	blue	NADH dehydrogenase activity	MF	0.392857	28	9.17664	Ndufa2;Ndufb9;Ndufa12;Ndufa7;Ndufb7;Ndufa13;Ndufb8;Ndufc2;Ndufs3;Ndufs7;Ndufs8;ND1;ND2;ND3;ND4;ND4L;ND5;ND6;Ndufs4;Ndufv1;Ndufa9;Ndufa10;Ndufa5;Ndufaf1;Ndufv2;Ndufaf2;Ndufs2;Ndufs1	11	Ndufa2;Ndufb9;Ndufa12;Ndufa7;Ndufb7;Ndufa13;Ndufb8;Ndufc2;Ndufs3;Ndufs7;Ndufs8
GO:0006333	blue	chromatin assembly or disassembly	BP	0.204724	127	9.07089	Cdkn2a;Hist1h2bc;Hist1h4h;Cenpv;Hist3h2ba;Hist1h3g;Hist1h3f;Hist1h3e;Hist1h3h;Hist1h3i;Hist2h3b;Hist1h4c;Hist1h4d;Hist1h4f;Hist1h4i;Hist1h4j;Hist1h4k;Hist1h4n;Hist1h2ba;Hist1h2bg;Hist1h2bh;Hist1h2bj;Hist1h2bl;Hist1h2bn;Hist1h4a;Hist1h4b;Cebpg;Ctcf;Daxx;Brd2;Hist1h1d;H1f0;Hist2h3c1;Hells;Hira;Hp1bp3;Mcm2;Nap1l2;Nap1l4;Npm1;Padi2;Rbbp4;Smarca4;Smarcb1;Smarcc1;Sox9;Tal1;Trp53;Tspyl1;Baz1b;Atrx;Tlk2;…	26	Cdkn2a;Hist1h2bc;Hist1h4h;Cenpv;Hist3h2ba;Hist1h3g;Hist1h3f;Hist1h3e;Hist1h3h;Hist1h3i;Hist2h3b;Hist1h4c;Hist1h4d;Hist1h4f;Hist1h4i;Hist1h4j;Hist1h4k;Hist1h4n;Hist1h2ba;Hist1h2bg;Hist1h2bh;Hist1h2bj;Hist1h2bl;Hist1h2bn;Hist1h4a;Hist1h4b
GO:0019866	blue	organelle inner membrane	CC	0.129584	409	8.80473	Coq7;Cox6a1;Cox8a;Fdx1;Timm10b;Ndufa2;Timm17b;Uqcrq;Capn10;Slc27a1;Mrpl17;Atp5l;Timm13;Timm23;Mtch1;Sdhc;Chchd6;Ndufb9;Ndufc1;Ndufa12;Ndufa7;Uqcr11;Ndufaf3;Ndufb7;Romo1;Atp5e;Ndufa6;Ndufa13;Ndufb8;Uqcc2;Unc50;Sdhb;Dnajc19;Ndufc2;Ndufb2;Ndufb10;Ndufs3;Smdt1;Oxa1l;Tmem256;Ndufa11;Mpc2;Coq2;Ndufs7;Uqcc3;Rhbdl1;Ndufs8;Ndufb6;Parl;Ndufs6;Ndufs5;Gpx4;Sco2;Abcb7;Acadvl;Ak2;Akap1;Alas2;Aldh3a2;Slc25a4;Sl…	53	Coq7;Cox6a1;Cox8a;Fdx1;Timm10b;Ndufa2;Timm17b;Uqcrq;Capn10;Slc27a1;Mrpl17;Atp5l;Timm13;Timm23;Mtch1;Sdhc;Chchd6;Ndufb9;Ndufc1;Ndufa12;Ndufa7;Uqcr11;Ndufaf3;Ndufb7;Romo1;Atp5e;Ndufa6;Ndufa13;Ndufb8;Uqcc2;Unc50;Sdhb;Dnajc19;Ndufc2;Ndufb2;Ndufb10;Ndufs3;Smdt1;Oxa1l;Tmem256;Ndufa11;Mpc2;Coq2;Ndufs7;Uqcc3;Rhbdl1;Ndufs8;Ndufb6;Parl;Ndufs6;Ndufs5;Gpx4;Sco2
GO:0006336	blue	DNA replication-independent nucleosome assembly	BP	0.384615	26	8.63422	Hist1h4h;Hist1h4c;Hist1h4d;Hist1h4f;Hist1h4i;Hist1h4j;Hist1h4k;Hist1h4n;Hist1h4a;Hist1h4b;Hira;Rbbp4;Atrx;Nasp;Cenpp;Asf1a;Mis18a;Asf1b;Itgb3bp;Ipo4;Hist2h4;Cabin1;Hat1;Ubn1;Hist4h4;Hist1h4m	10	Hist1h4h;Hist1h4c;Hist1h4d;Hist1h4f;Hist1h4i;Hist1h4j;Hist1h4k;Hist1h4n;Hist1h4a;Hist1h4b
GO:0034724	blue	DNA replication-independent nucleosome organization	BP	0.384615	26	8.63422	Hist1h4h;Hist1h4c;Hist1h4d;Hist1h4f;Hist1h4i;Hist1h4j;Hist1h4k;Hist1h4n;Hist1h4a;Hist1h4b;Hira;Rbbp4;Atrx;Nasp;Cenpp;Asf1a;Mis18a;Asf1b;Itgb3bp;Ipo4;Hist2h4;Cabin1;Hat1;Ubn1;Hist4h4;Hist1h4m	10	Hist1h4h;Hist1h4c;Hist1h4d;Hist1h4f;Hist1h4i;Hist1h4j;Hist1h4k;Hist1h4n;Hist1h4a;Hist1h4b
GO:0045652	blue	regulation of megakaryocyte differentiation	BP	0.37037	27	8.43241	Hist1h4h;Hist1h4c;Hist1h4d;Hist1h4f;Hist1h4i;Hist1h4j;Hist1h4k;Hist1h4n;Hist1h4a;Hist1h4b;Gabpa;Gata2;Prmt1;Mef2c;Scin;Thpo;Cib1;Pf4;Tesc;Hist2h4;Hmgb2;Kdm1a;Rcor1;Rab7b;L3mbtl1;Hist4h4;Hist1h4m	10	Hist1h4h;Hist1h4c;Hist1h4d;Hist1h4f;Hist1h4i;Hist1h4j;Hist1h4k;Hist1h4n;Hist1h4a;Hist1h4b
GO:0044391	blue	ribosomal subunit	CC	0.170886	158	8.01243	Mrpl23;Rps29;Mrpl17;Mrps7;Rpl36;Mrpl12;Rps27;Mrps24;Mrps36;Rps4l;Mrps28;Rps10;Rplp2;Mrpl42;Mrpl46;Mrps11;Rps13;Ict1;Mrpl28;Mrpl27;Mrpl34;Mrpl36;Mrpl43;Hba-a2;Mrps6;Mrpl22;Gm5218;Rplp0;Ddx3x;Fau;Rack1;Hba-a1;Rpsa;Eif2d;Rps2;Mrpl49;Npm1;Rbm3;Rpl10a;Rpl18;Rpl19;Rpl21;Rpl22;Rpl26;Rpl27;Rpl28;Rpl29;Rpl30;Rpl32;Rpl37a;Rpl36a;Rpl6;Rpl7;Rpl9;Rps12;Rps14;Rps15;Rps16;Rps17;Rps18;Rps19;Rps24;Rps3a1;Rps4x;Rp…	27	Mrpl23;Rps29;Mrpl17;Mrps7;Rpl36;Mrpl12;Rps27;Mrps24;Mrps36;Rps4l;Mrps28;Rps10;Rplp2;Mrpl42;Mrpl46;Mrps11;Rps13;Ict1;Mrpl28;Mrpl27;Mrpl34;Mrpl36;Mrpl43;Hba-a2;Mrps6;Mrpl22;Gm5218
GO:0000315	blue	organellar large ribosomal subunit	CC	0.305556	36	7.8132	Mrpl23;Mrpl17;Mrpl12;Mrpl46;Ict1;Mrpl28;Mrpl27;Mrpl34;Mrpl36;Mrpl43;Mrpl22;Mrpl49;Mrpl39;Mrpl15;Mrpl2;Mrpl19;Mrpl11;Mrpl20;Mrpl51;Mrpl33;Mrpl13;Mterf4;Nsun4;2810006K23Rik;Mrpl47;Mrpl32;Mrpl1;Mrpl3;Mrpl16;Nsun3;Mrpl10;Mrpl41;Mpv17l2;Mrpl21;Gm6434;Gm6578	11	Mrpl23;Mrpl17;Mrpl12;Mrpl46;Ict1;Mrpl28;Mrpl27;Mrpl34;Mrpl36;Mrpl43;Mrpl22
GO:0005762	blue	mitochondrial large ribosomal subunit	CC	0.305556	36	7.8132	Mrpl23;Mrpl17;Mrpl12;Mrpl46;Ict1;Mrpl28;Mrpl27;Mrpl34;Mrpl36;Mrpl43;Mrpl22;Mrpl49;Mrpl39;Mrpl15;Mrpl2;Mrpl19;Mrpl11;Mrpl20;Mrpl51;Mrpl33;Mrpl13;Mterf4;Nsun4;2810006K23Rik;Mrpl47;Mrpl32;Mrpl1;Mrpl3;Mrpl16;Nsun3;Mrpl10;Mrpl41;Mpv17l2;Mrpl21;Gm6434;Gm6578	11	Mrpl23;Mrpl17;Mrpl12;Mrpl46;Ict1;Mrpl28;Mrpl27;Mrpl34;Mrpl36;Mrpl43;Mrpl22
GO:0065004	blue	protein-DNA complex assembly	BP	0.171233	146	7.72024	Hist1h2bc;Hist1h4h;Cenpv;Hist3h2ba;Hist1h3g;Hist1h3f;Hist1h3e;Hist1h3h;Hist1h3i;Hist2h3b;Hist1h4c;Hist1h4d;Hist1h4f;Hist1h4i;Hist1h4j;Hist1h4k;Hist1h4n;Hist1h2ba;Hist1h2bg;Hist1h2bh;Hist1h2bj;Hist1h2bl;Hist1h2bn;Hist1h4a;Hist1h4b;Ahr;Cdc45;Cenpa;Cenpc1;Creb1;Daxx;Dmc1;Brd2;Hist1h1d;H1f0;Hist2h3c1;H3f3b;Hells;Hey2;Hira;Hp1bp3;Mcm2;Nap1l2;Nap1l4;Npm1;Psmc1;Psmc2;Psmc3;Psmc5;Rad51;Rad51d;Rad52;Rbbp4…	25	Hist1h2bc;Hist1h4h;Cenpv;Hist3h2ba;Hist1h3g;Hist1h3f;Hist1h3e;Hist1h3h;Hist1h3i;Hist2h3b;Hist1h4c;Hist1h4d;Hist1h4f;Hist1h4i;Hist1h4j;Hist1h4k;Hist1h4n;Hist1h2ba;Hist1h2bg;Hist1h2bh;Hist1h2bj;Hist1h2bl;Hist1h2bn;Hist1h4a;Hist1h4b
GO:0071103	blue	DNA conformation change	BP	0.153005	183	7.42611	Cdkn2a;H3f3a;Hist1h2bc;Hist1h4h;Cenpv;Hist3h2ba;Tssk6;Hist1h3g;Hist1h3f;Hist1h3e;Hist1h3h;Hist1h3i;Hist2h3b;Hist1h4c;Hist1h4d;Hist1h4f;Hist1h4i;Hist1h4j;Hist1h4k;Hist1h4n;Hist1h2ba;Hist1h2bg;Hist1h2bh;Hist1h2bj;Hist1h2bl;Hist1h2bn;Hist1h4a;Hist1h4b;Blm;Cdk1;Ctcf;Daxx;Ddx3x;Dffb;Ercc2;Ercc3;Smc2;Brd2;Xrcc6;Hist1h1d;H1f0;Hist2h3c1;H3f3b;Hells;Hhex;Hira;Hmgb1;Hmga2;Hp1bp3;Anxa1;Mcm2;Mcm4;Mcm6;Mcm7;M…	28	Cdkn2a;H3f3a;Hist1h2bc;Hist1h4h;Cenpv;Hist3h2ba;Tssk6;Hist1h3g;Hist1h3f;Hist1h3e;Hist1h3h;Hist1h3i;Hist2h3b;Hist1h4c;Hist1h4d;Hist1h4f;Hist1h4i;Hist1h4j;Hist1h4k;Hist1h4n;Hist1h2ba;Hist1h2bg;Hist1h2bh;Hist1h2bj;Hist1h2bl;Hist1h2bn;Hist1h4a;Hist1h4b
GO:0033108	blue	mitochondrial respiratory chain complex assembly	BP	0.30303	33	7.40807	Cox20;Cox14;Ndufaf3;Uqcc2;Cox19;Oxa1l;Ndufs7;Uqcc3;Ndufs8;Pet100;Ndufs4;Tfam;Aifm1;Coa3;Uqcc1;Immp1l;Bcs1l;Taz;Timm21;Coa4;Sdhaf1;Ndufaf4;Samm50;Ndufaf5;Slc25a33;Ttc19;Ndufaf7;Nubpl;Ndufaf6;Immp2l;Aars2;Acad9;Foxred1	10	Cox20;Cox14;Ndufaf3;Uqcc2;Cox19;Oxa1l;Ndufs7;Uqcc3;Ndufs8;Pet100
GO:0017004	blue	cytochrome complex assembly	BP	0.388889	18	7.27217	Cox20;Cox14;Uqcc2;Cox19;Uqcc3;Sco2;Pet100;Cyba;Coa3;Uqcc1;Bcs1l;Timm21;Coa4;Cox10;Slc25a33;Ttc19;Cox15;Cox18	7	Cox20;Cox14;Uqcc2;Cox19;Uqcc3;Sco2;Pet100
GO:0071824	blue	protein-DNA complex subunit organization	BP	0.154762	168	7.2253	Hist1h2bc;Hist1h4h;Znhit1;Cenpv;Hist3h2ba;Hist1h3g;Hist1h3f;Hist1h3e;Hist1h3h;Hist1h3i;Hist2h3b;Hist1h4c;Hist1h4d;Hist1h4f;Hist1h4i;Hist1h4j;Hist1h4k;Hist1h4n;Hist1h2ba;Hist1h2bg;Hist1h2bh;Hist1h2bj;Hist1h2bl;Hist1h2bn;Hist1h4a;Hist1h4b;Ahr;Cdc45;Cebpg;Cenpa;Cenpc1;Creb1;Ctcf;Daxx;Dmc1;Brd2;Hist1h1d;H1f0;Hist2h3c1;H3f3b;Hells;Hey2;Hira;Hp1bp3;Mcm2;Nap1l2;Nap1l4;Npm1;Psmc1;Psmc2;Psmc3;Psmc5;Ptma;R…	26	Hist1h2bc;Hist1h4h;Znhit1;Cenpv;Hist3h2ba;Hist1h3g;Hist1h3f;Hist1h3e;Hist1h3h;Hist1h3i;Hist2h3b;Hist1h4c;Hist1h4d;Hist1h4f;Hist1h4i;Hist1h4j;Hist1h4k;Hist1h4n;Hist1h2ba;Hist1h2bg;Hist1h2bh;Hist1h2bj;Hist1h2bl;Hist1h2bn;Hist1h4a;Hist1h4b
GO:0045333	blue	cellular respiration	BP	0.169355	124	7.00636	Bax;Coq7;Cox8a;Fxn;Bloc1s1;Idh3g;Cisd1;Sdhc;Ndufb9;Cox20;Ndufa7;Prelid1;Ndufb8;Sdhb;Cox19;Ndufc2;Oxa1l;Uqcc3;Idh3b;Ndufs6;Sco2;Aco1;Aco2;Actn3;Adsl;Bdnf;Bnip3;Cat;Cbfa2t3;Cox4i1;Cox5a;Cs;Cycs;Cyct;Cyp1a2;Dld;Fh1;Gpd1;Hif1a;Idh1;Mecp2;Mdh2;Mdh1;COX1;COX3;CYTB;ND2;ND4;ND4L;ND5;Myc;Ndufs4;Ndufv1;Nfatc3;Nr4a3;Ogdh;Mybbp1a;Pdha1;Pik3ca;Prkaca;Ppargc1a;Slc1a3;Snca;Sod2;Sucla2;Suclg2;Tbrg4;Uqcrc1;Polg2;…	21	Bax;Coq7;Cox8a;Fxn;Bloc1s1;Idh3g;Cisd1;Sdhc;Ndufb9;Cox20;Ndufa7;Prelid1;Ndufb8;Sdhb;Cox19;Ndufc2;Oxa1l;Uqcc3;Idh3b;Ndufs6;Sco2
GO:00007851	blue	chromatin	CC	0.105381	446	6.6417	Cdkn2a;H3f3a;Hist2h2aa1;Jund;Klf1;Cited2;Sox18;Zfp385a;Cbx8;Hist1h2bc;Hist1h4h;Ino80b;Znhit1;Hist3h2ba;Hist1h3g;Kif22;H2afj;Hist1h3f;Hist1h3e;Hist1h3h;Hist1h3i;Hist2h3b;Hist1h4c;Hist1h4d;Hist1h4f;Hist1h4i;Hist1h4j;Hist1h4k;Hist1h4n;Hist1h2ae;Hist1h2ag;Hist1h2ak;Hist1h2an;Hist1h2ab;Hist1h2af;Hist2h2ac;Hist1h2ba;Hist1h2bg;Hist1h2bh;Hist1h2bj;Hist1h2bl;Hist1h2bn;Hist2h2aa2;Hist1h4a;Hist1h4b;Hist1h2a…	47	Cdkn2a;H3f3a;Hist2h2aa1;Jund;Klf1;Cited2;Sox18;Zfp385a;Cbx8;Hist1h2bc;Hist1h4h;Ino80b;Znhit1;Hist3h2ba;Hist1h3g;Kif22;H2afj;Hist1h3f;Hist1h3e;Hist1h3h;Hist1h3i;Hist2h3b;Hist1h4c;Hist1h4d;Hist1h4f;Hist1h4i;Hist1h4j;Hist1h4k;Hist1h4n;Hist1h2ae;Hist1h2ag;Hist1h2ak;Hist1h2an;Hist1h2ab;Hist1h2af;Hist2h2ac;Hist1h2ba;Hist1h2bg;Hist1h2bh;Hist1h2bj;Hist1h2bl;Hist1h2bn;Hist2h2aa2;Hist1h4a;Hist1h4b;Hist1h2a…
GO:0000784	blue	nuclear chromosome, telomeric region	CC	0.162393	117	6.43043	H3f3a;Hist1h4h;Ten1;Hist1h3g;Hist1h3e;Hist1h3h;Hist1h3i;Hist2h3b;Hist1h4c;Hist1h4d;Hist1h4f;Hist1h4i;Hist1h4j;Hist1h4k;Hist1h4n;Hist1h2ak;Hist1h2ba;Hist1h4a;Hist1h4b;Parp1;Brca2;Cbx1;Cbx3;Cbx5;Cdk1;Ddb1;Ercc1;Fen1;Xrcc6;Hist2h3c1;H3f3b;Mcm3;Mcm2;Mcm4;Mcm5;Mcm6;Mcm7;Mre11a;Msh2;Orc1;Orc2;Pcna;Pml;Pold1;Ppp1ca;Ppp1cb;Prkdc;Rad50;Rad51;Rad51d;Upf1;Rpa2;Ssb;Terf1;Terf2;Tert;Tnks;Atrx;Xrcc5;Orc4;Orc5;…	19	H3f3a;Hist1h4h;Ten1;Hist1h3g;Hist1h3e;Hist1h3h;Hist1h3i;Hist2h3b;Hist1h4c;Hist1h4d;Hist1h4f;Hist1h4i;Hist1h4j;Hist1h4k;Hist1h4n;Hist1h2ak;Hist1h2ba;Hist1h4a;Hist1h4b
GO:0008535	blue	respiratory chain complex IV assembly	BP	0.416667	12	6.41295	Cox20;Cox14;Cox19;Sco2;Pet100;Coa3;Bcs1l;Timm21;Coa4;Cox10;Cox15;Cox18	5	Cox20;Cox14;Cox19;Sco2;Pet100
GO:0030219	blue	megakaryocyte differentiation	BP	0.229167	48	6.4027	Zfp385a;Hist1h4h;Hist1h4c;Hist1h4d;Hist1h4f;Hist1h4i;Hist1h4j;Hist1h4k;Hist1h4n;Hist1h4a;Hist1h4b;Abi1;Fli1;Gabpa;Gata1;Gata2;Ptpn6;Prmt1;Kit;Mef2c;Meis1;Pip4k2a;Med1;Ptpn11;Scin;Sp1;Sp3;Srf;Tal1;Thpo;Zfpm1;Cib1;Rabgap1l;Pf4;Tesc;Hist2h4;Hmgb2;Kdm1a;G6b;Rcor1;Rab7b;Vps33b;Nbeal2;L3mbtl1;Wasf2;Hist4h4;Ep300;Hist1h4m	11	Zfp385a;Hist1h4h;Hist1h4c;Hist1h4d;Hist1h4f;Hist1h4i;Hist1h4j;Hist1h4k;Hist1h4n;Hist1h4a;Hist1h4b
GO:0003735	blue	structural constituent of ribosome	MF	0.134715	193	6.3641	Mrpl23;Rps29;Mrpl17;Mrps7;Rpl36;Rplp1;Mrpl12;Rps27;Mrps24;Rps4l;Ndufa7;Rps10;Rplp2;Mrpl46;Mrpl57;Mrps11;Rps13;Mrpl14;Mrpl28;Mrpl27;Mrpl34;Mrpl36;Mrpl43;Mrps6;Mrpl22;Gm5218;Slc25a4;Slc25a5;Rplp0;Slc25a1;Fau;Rpsa;Rps2;Mrpl49;Slc25a15;Slc25a3;Rpl10a;Rpl18;Rpl19;Rpl21;Rpl22;Rpl26;Rpl27;Rpl28;Rpl29;Rpl30;Rpl32;Rpl37a;Rpl6;Rpl7;Rpl9;Rps12;Rps14;Rps15;Rps16;Rps17;Rps18;Rps19;Rps24;Rps3a1;Rps4x;Rps5;Rps6…	26	Mrpl23;Rps29;Mrpl17;Mrps7;Rpl36;Rplp1;Mrpl12;Rps27;Mrps24;Rps4l;Ndufa7;Rps10;Rplp2;Mrpl46;Mrpl57;Mrps11;Rps13;Mrpl14;Mrpl28;Mrpl27;Mrpl34;Mrpl36;Mrpl43;Mrps6;Mrpl22;Gm5218
GO:0006119	blue	oxidative phosphorylation	BP	0.210526	57	6.28152	Coq7;Cox8a;Fxn;Sdhc;Ndufb9;Ndufa7;Ndufb8;Uqcc2;Ndufc2;Gadd45gip1;Chchd10;Uqcc3;Actn3;Apoc3;Rhoa;Atp7a;Bdnf;Cox4i1;Cox5a;Cycs;Cyct;Dld;Gbas;Mecp2;Msh2;CYTB;ND2;ND4;ND4L;ND5;Myc;Cox7a2l;Snca;Surf1;Uqcrc1;Park7;Mlxipl;Sdhaf2;Dnajc15;Uqcr10;Uqcrh;Taz;Slc25a23;Uqcrc2;Ndufa10;Uqcrb;Coq9;Tefm;Pink1;Slc25a33;Ndufv2;Pmpcb;Cox4i2;Ppif;Ndufs1;Lexm;Vcp	12	Coq7;Cox8a;Fxn;Sdhc;Ndufb9;Ndufa7;Ndufb8;Uqcc2;Ndufc2;Gadd45gip1;Chchd10;Uqcc3
GO:1901532	blue	regulation of hematopoietic progenitor cell differentiation	BP	0.232558	43	6.16935	Hist1h4h;Hist1h4c;Hist1h4d;Hist1h4f;Hist1h4i;Hist1h4j;Hist1h4k;Hist1h4n;Hist1h4a;Hist1h4b;Ap2a2;Flt1;Gabpa;Gata2;Hes1;Prmt1;Kdr;Mef2c;Foxc1;Nfe2l2;Notch1;Pdcd2;Eif2ak2;Scin;Sos1;Sos2;Thpo;Vegfa;Cib1;Pf4;Tesc;Hist2h4;Hmgb2;Kdm1a;Fnip1;Flcn;Rcor1;Rab7b;L3mbtl1;Zbtb1;Hist4h4;N4bp2l2;Hist1h4m	10	Hist1h4h;Hist1h4c;Hist1h4d;Hist1h4f;Hist1h4i;Hist1h4j;Hist1h4k;Hist1h4n;Hist1h4a;Hist1h4b
GO:0000790	blue	nuclear chromatin	CC	0.113333	300	6.11099	H3f3a;Hist2h2aa1;Jund;Klf1;Cited2;Sox18;Zfp385a;Cbx8;Hist1h2bc;Ino80b;Znhit1;Hist3h2ba;Hist1h3g;H2afj;Hist1h3e;Hist1h3h;Hist1h3i;Hist2h3b;Hist1h2ae;Hist1h2ag;Hist1h2ak;Hist1h2an;Hist1h2ab;Hist1h2af;Hist2h2ac;Hist1h2ba;Hist1h2bg;Hist1h2bh;Hist1h2bj;Hist1h2bl;Hist1h2bn;Hist2h2aa2;Hist1h2ao;Hist1h2al;Actb;Aldoa;Ar;Phox2a;Ctnnb1;Runx2;Runx3;Cbx3;Cbx5;Cebpb;Clock;Creb1;Crebbp;Csnk2a1;Dffa;Dffb;Dnmt3a;…	34	H3f3a;Hist2h2aa1;Jund;Klf1;Cited2;Sox18;Zfp385a;Cbx8;Hist1h2bc;Ino80b;Znhit1;Hist3h2ba;Hist1h3g;H2afj;Hist1h3e;Hist1h3h;Hist1h3i;Hist2h3b;Hist1h2ae;Hist1h2ag;Hist1h2ak;Hist1h2an;Hist1h2ab;Hist1h2af;Hist2h2ac;Hist1h2ba;Hist1h2bg;Hist1h2bh;Hist1h2bj;Hist1h2bl;Hist1h2bn;Hist2h2aa2;Hist1h2ao;Hist1h2al
GO:0015935	blue	small ribosomal subunit	CC	0.191176	68	6.07203	Rps29;Mrps7;Rps27;Mrps24;Mrps36;Rps4l;Mrps28;Rps10;Mrpl42;Mrps11;Rps13;Hba-a2;Mrps6;Ddx3x;Fau;Rack1;Hba-a1;Rpsa;Eif2d;Rps2;Npm1;Rps12;Rps14;Rps15;Rps16;Rps17;Rps18;Rps19;Rps24;Rps3a1;Rps4x;Rps5;Rps6;Rps7;Rps8;Mrps12;Rps3;Rps11;Rps26;Rps28;Mrps31;Mrps22;Mrps23;Mrps10;Mrps25;Mrps14;Dap3;Mrps16;Mrps17;Mrps21;Mrps15;Rps23;Rps21;Mrps18b;Rps20;Rps27l;Mrps18a;Mrps18c;Mcts1;Mrps9;Rps25;Rps9;Mrps5;Rps27a;…	13	Rps29;Mrps7;Rps27;Mrps24;Mrps36;Rps4l;Mrps28;Rps10;Mrpl42;Mrps11;Rps13;Hba-a2;Mrps6
GO:0051262	blue	protein tetramerization	BP	0.145985	137	6.00838	Dhrs4;Dctpp1;Oxa1l;Hist1h4h;Pcbd2;Hist1h3g;Apoa1bp;Hist1h3e;Hist1h3h;Hist1h3i;Hist2h3b;Hist1h4c;Hist1h4d;Hist1h4f;Hist1h4i;Hist1h4j;Hist1h4k;Hist1h4n;Hist1h4a;Hist1h4b;Acadl;Acadm;Acads;Ache;Actn2;Adsl;Agrn;Aldh1a1;Aldoc;Mat1a;Anxa2;Cat;Cnga2;Cryz;Pcbd1;Dnm1;Evl;Fbp1;Fh1;Xrcc6;Gfpt1;Gls;Gnmt;Gpx3;Gria2;Grin1;Grin2a;H2-T18;Hist2h3c1;Hsd17b10;Hmgcl;Hmgcr;Hprt;Ide;Igf1r;Insr;Kcnc1;Kcnc3;Kcnj10;Kcnj1…	20	Dhrs4;Dctpp1;Oxa1l;Hist1h4h;Pcbd2;Hist1h3g;Apoa1bp;Hist1h3e;Hist1h3h;Hist1h3i;Hist2h3b;Hist1h4c;Hist1h4d;Hist1h4f;Hist1h4i;Hist1h4j;Hist1h4k;Hist1h4n;Hist1h4a;Hist1h4b
GO:0016651	blue	oxidoreductase activity, acting on NAD(P)H	MF	0.185714	70	5.93444	Cbr1;Ndufa2;Dhrs4;Ndufb9;Ndufa12;Ndufa7;Ndufb7;Ndufa13;Ndufb8;Ndufc2;Ndufs3;Ndufs7;Ndufs8;Cryz;Cyba;Cybb;Cyp2j6;Dld;Gsr;ND1;ND2;ND3;ND4;ND4L;ND5;ND6;Ncf1;Ncf2;Ndufs4;Ndufv1;Nqo1;Nnt;Nxn;Por;Txnrd2;Adh4;Aifm1;Ecsit;Nox4;Txnrd1;Txndc17;Miox;Ndufa9;Gmpr;Ndufa10;Dcxr;Ndufa5;Ndufaf1;Cyb5r1;Ndufv2;Ndufaf2;Akr1c21;Ndor1;Kmo;Gmpr2;Cyb5r3;Mtrr;Txndc2;Duox2;Cox15;Ndufs2;Ndufs1;Cyb5rl;Txnrd3;Pyroxd1;Cbr4;No…	13	Cbr1;Ndufa2;Dhrs4;Ndufb9;Ndufa12;Ndufa7;Ndufb7;Ndufa13;Ndufb8;Ndufc2;Ndufs3;Ndufs7;Ndufs8
GO:0006342	blue	chromatin silencing	BP	0.177215	79	5.93143	Hist2h2aa1;Cbx8;Msl3l2;H2afj;Hist1h2ae;Hist1h2ag;Hist1h2ak;Hist1h2an;Hist1h2ab;Hist1h2af;Hist2h2ac;Hist2h2aa2;Hist1h2ao;Hist1h2al;Aicda;Apobec1;Cdc45;Dnmt3a;Dnmt3b;Hdac2;Hells;H2afx;Mbd1;Mbd2;Mbd3;Mecp2;Msl3;Uhrf1;Phf2;Sin3a;Smarca4;Suv39h1;Ubtf;Morf4l1;Ube2b;Uty;H2afy;H2afz;Tet1;Morf4l2;Dpy30;Hypm;Atad2;Mier1;Dydc2;1700012L04Rik;H2afv;Sirt1;Arid1a;Smarca5;Rrp8;Hat1;Uhrf2;Baz2a;Ubr2;Bahd1;Tnrc18;…	14	Hist2h2aa1;Cbx8;Msl3l2;H2afj;Hist1h2ae;Hist1h2ag;Hist1h2ak;Hist1h2an;Hist1h2ab;Hist1h2af;Hist2h2ac;Hist2h2aa2;Hist1h2ao;Hist1h2al
GO:0005759	blue	mitochondrial matrix	CC	0.12381	210	5.85499	Bloc1s1;Mrpl23;Capn10;Mrpl17;Mrps7;Mrpl12;Mrps24;Mrps36;Mrps28;Ndufa7;Uqcc2;Mrpl42;Mrpl46;Mrpl57;Mrps11;Ict1;Mrpl28;Mrpl27;Mrpl34;Mrpl36;Mrpl43;Gadd45gip1;Mthfs;Mrps6;Mrpl22;AK157302;Acadl;Acadm;Acadvl;Acads;Ak4;Akap1;Alas1;Alas2;Slc25a5;Atp5b;Bckdha;Bckdhb;Bckdk;Brca1;C1qbp;Casq1;Creb1;Cs;Dbt;Hagh;Gls;Glud1;H2-Ke6;Hsd17b10;Tfb2m;Hmgcs2;Hspa1b;Hspa9;Hspe1;Mcl1;Mdh2;Grpel1;Nudt1;Nfs1;Mrpl40;Mrpl49…	26	Bloc1s1;Mrpl23;Capn10;Mrpl17;Mrps7;Mrpl12;Mrps24;Mrps36;Mrps28;Ndufa7;Uqcc2;Mrpl42;Mrpl46;Mrpl57;Mrps11;Ict1;Mrpl28;Mrpl27;Mrpl34;Mrpl36;Mrpl43;Gadd45gip1;Mthfs;Mrps6;Mrpl22;AK157302
GO:0022904	blue	respiratory electron transport chain	BP	0.2	55	5.78307	Coq7;Cox8a;Sdhc;Ndufb9;Ndufa7;Ndufb8;Sdhb;Ndufc2;Uqcc3;Ndufs6;Sco2;Bdnf;Cox4i1;Cox5a;Cycs;Cyct;Dld;Gpd1;Mecp2;COX3;CYTB;ND2;ND4;ND4L;ND5;Mybbp1a;Ppargc1a;Slc1a3;Snca;Sod2;Uqcrc1;Polg2;Slc25a13;Slc37a2;Park7;Sdhaf2;Dnajc15;Uqcr10;Uqcrh;Taz;Sdha;Uqcrc2;Ndufa10;Uqcrb;Coq9;Ndufa5;Pink1;Ndufv2;Pmpcb;Ndufaf2;Slc25a12;Cox4i2;Immp2l;Aldh5a1;Ndufs1	11	Coq7;Cox8a;Sdhc;Ndufb9;Ndufa7;Ndufb8;Sdhb;Ndufc2;Uqcc3;Ndufs6;Sco2
GO:0042393	blue	histone binding	MF	0.135484	155	5.74443	H3f3a;Phf1;Cbx8;Coprs;Pih1d1;Hist1h4h;Hist1h3g;Hist1h3f;Hist1h3e;Hist1h3h;Hist1h3i;Hist2h3b;Hist1h4c;Hist1h4d;Hist1h4f;Hist1h4i;Hist1h4j;Hist1h4k;Hist1h4n;Hist1h4a;Hist1h4b;Apbb1;Cbx2;Cbx4;Cbx5;Cd1d1;Chd1;Ctsl;Daxx;Brd2;Usp15;Gk;Hist2h3c1;H3f3b;H2afx;Jak2;Lef1;Mcm2;Msh6;Msl3;Mtf2;Nap1l2;Ncl;Uhrf1;Npm1;Phf2;Prkcb;Ptma;Uimc1;Smarca4;Snca;Spin1;Supt6;Tbl1x;Trim24;Tnks;Vrk1;Baz1b;Atrx;Dnajc2;Ing1;Brd…	21	H3f3a;Phf1;Cbx8;Coprs;Pih1d1;Hist1h4h;Hist1h3g;Hist1h3f;Hist1h3e;Hist1h3h;Hist1h3i;Hist2h3b;Hist1h4c;Hist1h4d;Hist1h4f;Hist1h4i;Hist1h4j;Hist1h4k;Hist1h4n;Hist1h4a;Hist1h4b
GO:0045814	blue	negative regulation of gene expression, epigenetic	BP	0.168675	83	5.69452	Hist2h2aa1;Cbx8;Msl3l2;H2afj;Hist1h2ae;Hist1h2ag;Hist1h2ak;Hist1h2an;Hist1h2ab;Hist1h2af;Hist2h2ac;Hist2h2aa2;Hist1h2ao;Hist1h2al;Aicda;Apobec1;Cdc45;Dnmt3a;Dnmt3b;Epc1;Ezh2;Hdac2;Hells;H2afx;Mbd1;Mbd2;Mbd3;Mecp2;Msl3;Uhrf1;Phf2;Trim27;Spi1;Sin3a;Smarca4;Suv39h1;Ubtf;Morf4l1;Ube2b;Uty;H2afy;H2afz;Tet1;Morf4l2;Dpy30;Hypm;Atad2;Mier1;Dydc2;1700012L04Rik;H2afv;Sirt1;Arid1a;Smarca5;Rrp8;Hat1;Uhrf2;Ba…	14	Hist2h2aa1;Cbx8;Msl3l2;H2afj;Hist1h2ae;Hist1h2ag;Hist1h2ak;Hist1h2an;Hist1h2ab;Hist1h2af;Hist2h2ac;Hist2h2aa2;Hist1h2ao;Hist1h2al
GO:0044454	blue	nuclear chromosome part	CC	0.0939457	479	5.63372	H3f3a;Hist2h2aa1;Jund;Klf1;Cited2;Sox18;Zfp385a;Cbx8;Hist1h2bc;Hist1h4h;Ten1;Ino80b;Znhit1;Hist3h2ba;Hist1h3g;H2afj;Hist1h3e;Hist1h3h;Hist1h3i;Hist2h3b;Hist1h4c;Hist1h4d;Hist1h4f;Hist1h4i;Hist1h4j;Hist1h4k;Hist1h4n;Hist1h2ae;Hist1h2ag;Hist1h2ak;Hist1h2an;Hist1h2ab;Hist1h2af;Hist2h2ac;Hist1h2ba;Hist1h2bg;Hist1h2bh;Hist1h2bj;Hist1h2bl;Hist1h2bn;Hist2h2aa2;Hist1h4a;Hist1h4b;Hist1h2ao;Hist1h2al;Actb;…	45	H3f3a;Hist2h2aa1;Jund;Klf1;Cited2;Sox18;Zfp385a;Cbx8;Hist1h2bc;Hist1h4h;Ten1;Ino80b;Znhit1;Hist3h2ba;Hist1h3g;H2afj;Hist1h3e;Hist1h3h;Hist1h3i;Hist2h3b;Hist1h4c;Hist1h4d;Hist1h4f;Hist1h4i;Hist1h4j;Hist1h4k;Hist1h4n;Hist1h2ae;Hist1h2ag;Hist1h2ak;Hist1h2an;Hist1h2ab;Hist1h2af;Hist2h2ac;Hist1h2ba;Hist1h2bg;Hist1h2bh;Hist1h2bj;Hist1h2bl;Hist1h2bn;Hist2h2aa2;Hist1h4a;Hist1h4b;Hist1h2ao;Hist1h2al
GO:0000314	blue	organellar small ribosomal subunit	CC	0.259259	27	5.57338	Mrps7;Mrps24;Mrps36;Mrps28;Mrpl42;Mrps11;Mrps6;Mrps12;Mrps31;Mrps22;Mrps23;Mrps10;Mrps25;Mrps14;Dap3;Mrps16;Mrps17;Mrps21;Mrps15;Mrps18b;Mrps18a;Mrps18c;Mrps9;Mrps5;Mrps26;Mrps2;Mrps35	7	Mrps7;Mrps24;Mrps36;Mrps28;Mrpl42;Mrps11;Mrps6
GO:0005763	blue	mitochondrial small ribosomal subunit	CC	0.259259	27	5.57338	Mrps7;Mrps24;Mrps36;Mrps28;Mrpl42;Mrps11;Mrps6;Mrps12;Mrps31;Mrps22;Mrps23;Mrps10;Mrps25;Mrps14;Dap3;Mrps16;Mrps17;Mrps21;Mrps15;Mrps18b;Mrps18a;Mrps18c;Mrps9;Mrps5;Mrps26;Mrps2;Mrps35	7	Mrps7;Mrps24;Mrps36;Mrps28;Mrpl42;Mrps11;Mrps6
GO:0015980	blue	energy derivation by oxidation of organic compounds	BP	0.120603	199	5.47258	Bax;Coq7;Cox8a;Fxn;Bloc1s1;Idh3g;Mt3;Pomc;Cisd1;Sdhc;Ndufb9;Cox20;Ndufa7;Prelid1;Ndufb8;Sdhb;Cox19;Ndufc2;Oxa1l;Uqcc3;Prkcdbp;Idh3b;Ndufs6;Sco2;Acadm;Aco1;Aco2;Actn3;Adra1b;Adrb1;Adsl;Akt1;Akt2;Bdnf;Bnip3;Cat;Cbfa2t3;Cox4i1;Cox5a;Cs;Cycs;Cyct;Cyp1a2;Dld;Epm2a;Fh1;Slc37a4;Gaa;Gcgr;Gpd1;Gfpt1;Gnas;Gnmt;Grb10;Gys1;Hif1a;Hmgb1;Idh1;Igf1;Igf2;Il6st;Ins2;Insr;Irs1;Khk;Kl;Ldha;Mc4r;Mecp2;Mdh2;Mdh1;COX1;…	24	Bax;Coq7;Cox8a;Fxn;Bloc1s1;Idh3g;Mt3;Pomc;Cisd1;Sdhc;Ndufb9;Cox20;Ndufa7;Prelid1;Ndufb8;Sdhb;Cox19;Ndufc2;Oxa1l;Uqcc3;Prkcdbp;Idh3b;Ndufs6;Sco2
GO:0000781	blue	chromosome, telomeric region	CC	0.134752	141	5.4334	H3f3a;Hist1h4h;Ten1;Hist1h3g;Hist1h3e;Hist1h3h;Hist1h3i;Hist2h3b;Hist1h4c;Hist1h4d;Hist1h4f;Hist1h4i;Hist1h4j;Hist1h4k;Hist1h4n;Hist1h2ak;Hist1h2ba;Hist1h4a;Hist1h4b;Parp1;Atm;Blm;Brca2;Cbx1;Cbx3;Cbx5;Cdk1;Cdk2;Chek1;Ddb1;Dmc1;Ercc1;Fen1;Xrcc6;Hist2h3c1;H3f3b;H2afx;Mcm3;Mcm2;Mcm4;Mcm5;Mcm6;Mcm7;Mre11a;Msh2;Orc1;Orc2;Pcna;Pml;Pold1;Ppp1ca;Ppp1cb;Prkdc;Rad17;Rad50;Rad51;Rad51d;Upf1;Rpa2;Ssb;Tep1;Te…	19	H3f3a;Hist1h4h;Ten1;Hist1h3g;Hist1h3e;Hist1h3h;Hist1h3i;Hist2h3b;Hist1h4c;Hist1h4d;Hist1h4f;Hist1h4i;Hist1h4j;Hist1h4k;Hist1h4n;Hist1h2ak;Hist1h2ba;Hist1h4a;Hist1h4b
GO:0005758	blue	mitochondrial intermembrane space	CC	0.180328	61	5.32982	Timm10b;Bloc1s1;Sod1;Capn10;Timm23;Arl2;Prelid1;Ndufb7;Uqcc2;Cox19;Chchd10;Ak2;Cat;Cpox;Cycs;Cyct;Pdia3;Hsd3b2;Hsd3b3;Lyn;Myoc;Star;Dtymk;Hax1;Aifm1;Timm9;Timm8a1;Timm10;Thop1;Ak3;Txnip;Park7;Htra2;Chchd5;Slmo2;Stoml2;Diablo;Gatm;Trap1;Coa4;Sirt5;Ndufa8;Micu2;Pink1;Triap1;Ggnbp1;Sdhaf3;Pnpt1;Chchd4;Opa1;Dusp18;Nln;Prelid2;Glrx;Arl2bp;Shmt2;Suox;Micu1;Slmo1;Ndufs1;Fbxl4	11	Timm10b;Bloc1s1;Sod1;Capn10;Timm23;Arl2;Prelid1;Ndufb7;Uqcc2;Cox19;Chchd10
GO:0022900	blue	electron transport chain	BP	0.180328	61	5.32982	Coq7;Cox8a;Sdhc;Ndufb9;Ndufa7;Ndufb8;Sdhb;Ndufc2;Uqcc3;Ndufs6;Sco2;Bdnf;Cox4i1;Cox5a;Cyb561;Cycs;Cyct;Dld;Gpd1;Mecp2;COX2;COX3;CYTB;ND2;ND4;ND4L;ND5;Ndufs4;Mybbp1a;Ppargc1a;Slc1a3;Snca;Sod2;Uqcrc1;Polg2;Slc25a13;Slc37a2;Park7;Sdhaf2;Dnajc15;Uqcr10;Ndufb3;Uqcrh;Taz;Etfdh;Sdha;Uqcrc2;Ndufa10;Uqcrb;Coq9;Ndufa5;Pink1;Ndufv2;Pmpcb;Ndufaf2;Slc25a12;Cox4i2;Immp2l;Aldh5a1;Ndufs1;Wdr93	11	Coq7;Cox8a;Sdhc;Ndufb9;Ndufa7;Ndufb8;Sdhb;Ndufc2;Uqcc3;Ndufs6;Sco2
GO:0016458	blue	gene silencing	BP	0.128205	156	5.3112	Hist2h2aa1;Cbx8;Msl3l2;Hist1h3g;Wtip;H2afj;Hist1h3e;Hist1h3h;Hist1h3i;Hist2h3b;Hist1h2ae;Hist1h2ag;Hist1h2ak;Hist1h2an;Hist1h2ab;Hist1h2af;Hist2h2ac;Hist2h2aa2;Hist1h2ao;Hist1h2al;Aicda;Apobec1;Cdc45;Cdk2;Dnmt1;Dnmt3a;Dnmt3b;Drosha;Hist2h3c1;Hdac2;Hells;H2afx;Ajuba;Kcnq1;Mbd1;Mbd2;Mbd3;Mecp2;Mov10;Msl3;Nfkb1;Uhrf1;Pabpc1;Phf2;Cnot7;Rbm3;Rbm4;Sin3a;Smarca4;Sox6;Suv39h1;Tarbp2;Ubtf;Tert;Morf4l1;Tgf…	20	Hist2h2aa1;Cbx8;Msl3l2;Hist1h3g;Wtip;H2afj;Hist1h3e;Hist1h3h;Hist1h3i;Hist2h3b;Hist1h2ae;Hist1h2ag;Hist1h2ak;Hist1h2an;Hist1h2ab;Hist1h2af;Hist2h2ac;Hist2h2aa2;Hist1h2ao;Hist1h2al
GO:0015934	blue	large ribosomal subunit	CC	0.153846	91	5.26224	Mrpl23;Mrpl17;Rpl36;Mrpl12;Rplp2;Mrpl46;Ict1;Mrpl28;Mrpl27;Mrpl34;Mrpl36;Mrpl43;Mrpl22;Gm5218;Rplp0;Mrpl49;Npm1;Rbm3;Rpl10a;Rpl18;Rpl19;Rpl21;Rpl22;Rpl26;Rpl27;Rpl28;Rpl29;Rpl30;Rpl32;Rpl37a;Rpl36a;Rpl6;Rpl7;Rpl9;Rpl13a;Rpl27a;Rpl8;Rpl7a;Rpl3;Mrpl39;Mrpl15;Mrpl2;Zfp622;Mrpl19;Rpl35a;Rpl23;Rpl3l;Rpl7l1;Mrpl11;Mrpl20;Rpl15;Rpl35;Mrpl51;Mrpl33;Rpl11;Rpl14;Rpl39;Rpl37;Rpl38;Rpl4;Rpl22l1;Rpl24;Rpl34;M…	14	Mrpl23;Mrpl17;Rpl36;Mrpl12;Rplp2;Mrpl46;Ict1;Mrpl28;Mrpl27;Mrpl34;Mrpl36;Mrpl43;Mrpl22;Gm5218
GO:0042773	blue	ATP synthesis coupled electron transport	BP	0.216216	37	5.22937	Coq7;Cox8a;Sdhc;Ndufb9;Ndufa7;Ndufb8;Ndufc2;Uqcc3;Bdnf;Cox4i1;Cox5a;Cycs;Cyct;Dld;Mecp2;CYTB;ND2;ND4;ND4L;ND5;Snca;Uqcrc1;Park7;Sdhaf2;Dnajc15;Uqcr10;Uqcrh;Taz;Uqcrc2;Ndufa10;Uqcrb;Coq9;Pink1;Ndufv2;Pmpcb;Cox4i2;Ndufs1	8	Coq7;Cox8a;Sdhc;Ndufb9;Ndufa7;Ndufb8;Ndufc2;Uqcc3
GO:0051291	blue	protein heterooligomerization	BP	0.131387	137	5.15948	Cldn3;Nup62;Hist1h4h;Pcbd2;Hist1h3g;Hist1h3e;Hist1h3h;Hist1h3i;Hist2h3b;Hist1h4c;Hist1h4d;Hist1h4f;Hist1h4i;Hist1h4j;Hist1h4k;Hist1h4n;Hist1h4a;Hist1h4b;Chrna4;Chrnb2;Acvrl1;Agrn;Akap2;Aldoc;Birc3;Birc2;Bcl10;Anxa2;Casp8;Ctnna1;Ctnnb1;Cdh2;Cldn1;Cnga2;Cntf;Col6a1;Col6a2;Col1a1;Col1a2;Pcbd1;Fadd;Xrcc6;Gch1;Glra1;Glrb;Gna11;Gnaq;Gnb1;Grb2;Hist2h3c1;Hr;Hras;Ide;Igf1r;Ilk;Insr;Irs1;Itpr3;Jup;Kcnab2;K…	18	Cldn3;Nup62;Hist1h4h;Pcbd2;Hist1h3g;Hist1h3e;Hist1h3h;Hist1h3i;Hist2h3b;Hist1h4c;Hist1h4d;Hist1h4f;Hist1h4i;Hist1h4j;Hist1h4k;Hist1h4n;Hist1h4a;Hist1h4b
GO:0090201	blue	negative regulation of release of cytochrome c from mitochondria	BP	0.294118	17	5.13265	Fxn;Gpx1;Prelid1;Nol3;Parl;Akt1;Bcl2l1;Hgf;Igf1;Lmna;Park2;Psmd10;Higd1a;Triap1;Opa1;Ppif;Arrb2	5	Fxn;Gpx1;Prelid1;Nol3;Parl
GO:0015078	blue	hydrogen ion transmembrane transporter activity	MF	0.155844	77	4.92551	Atp6v0e;Cox6a1;Cox8a;Uqcrq;Atp5l;Atp6v1f;Uqcr11;Atp5e;Coa6;Atp6v0b;Atp5g3;Slc36a2;Atp4a;Atp5a1;Atp5b;Atp5c1;Atp5f1;Atp5g1;Atp5j;Atp5k;Atp6v1a;Atp6v0d1;Atp6v1e1;Atp6v0a1;Atp6v0c;Cox4i1;Cox5a;Cox6a2;Cox6c;Cox7a1;Cox7a2;Cox7c;ATP6;ATP8;COX1;COX2;COX3;CYTB;Ndufa4;Slc11a1;Slc11a2;Cox7a2l;Slc9a1;Surf1;Atp6v0a2;Tcirg1;Atp5o;Slc46a1;Atp6ap1;Atp5d;Cox7b;Atp6v1g2;Atp6v1g1;Atp6v1c1;Uqcrh;Uqcrfs1;Slc47a1;Atp…	12	Atp6v0e;Cox6a1;Cox8a;Uqcrq;Atp5l;Atp6v1f;Uqcr11;Atp5e;Coa6;Atp6v0b;Atp5g3;Slc36a2
GO:0042775	blue	mitochondrial ATP synthesis coupled electron transport	BP	0.212121	33	4.82152	Coq7;Cox8a;Sdhc;Ndufb9;Ndufb8;Ndufc2;Uqcc3;Bdnf;Cox4i1;Cox5a;Cycs;Cyct;Dld;Mecp2;CYTB;ND2;ND4;Snca;Uqcrc1;Park7;Sdhaf2;Dnajc15;Uqcr10;Uqcrh;Taz;Uqcrc2;Ndufa10;Uqcrb;Coq9;Pink1;Ndufv2;Pmpcb;Cox4i2	7	Coq7;Cox8a;Sdhc;Ndufb9;Ndufb8;Ndufc2;Uqcc3
GO:0045638	blue	negative regulation of myeloid cell differentiation	BP	0.151899	79	4.81544	Tob2;Hist1h4h;Fstl3;Hist1h4c;Hist1h4d;Hist1h4f;Hist1h4i;Hist1h4j;Hist1h4k;Hist1h4n;Hist1h4a;Hist1h4b;C1qc;Ctnnb1;Runx1;Cdk6;Dll1;Gabpa;Gata2;Hmgb3;Hoxa5;Hoxa7;Prmt1;Il4;Inpp5d;Mafb;Ldb1;Lmo2;Lyn;Meis1;Meis2;Myc;Nf1;Nfkbia;Nme1;Nme2;Pik3r1;Ptk2b;Ptpn2;Rara;Apcs;Sfrp1;Stat5a;Stat5b;Tjp2;Ctr9;Zfp36;Zfpm1;Cib1;Cartpt;Klf13;Paf1;Cldn18;Pf4;Wdr61;Tmem178;Prdm16;Zbtb46;Ubash3b;Lrrc17;Gas2l1;Clec2i;Clec2…	12	Tob2;Hist1h4h;Fstl3;Hist1h4c;Hist1h4d;Hist1h4f;Hist1h4i;Hist1h4j;Hist1h4k;Hist1h4n;Hist1h4a;Hist1h4b
GO:0006091	blue	generation of precursor metabolites and energy	BP	0.099631	271	4.67799	Bax;Coq7;Cox8a;Fxn;Bloc1s1;Idh3g;Mt3;Pomc;Cisd1;Sdhc;Ndufb9;Cox20;Ndufa7;Prelid1;Ndufb8;Uqcc2;Sdhb;Cox19;Ndufc2;Oxa1l;Gadd45gip1;Chchd10;Uqcc3;Prkcdbp;Idh3b;Ndufs6;Sco2;Acadm;Aco1;Aco2;Acox1;Actn3;Adra1b;Adrb1;Adsl;Akt1;Akt2;Aldoa;Aldoc;Apoc3;Rhoa;Atp7a;Bdnf;Bnip3;Bpgm;Cat;Cbfa2t3;Entpd5;Cox4i1;Cox5a;Cs;Cyb561;Cycs;Cyct;Cyp1a2;Dld;Eno2;Eno3;Epm2a;Fbp1;Fh1;Slc37a4;Gaa;Galt;Gapdh;Gapdhs;Gbas;Gcgr;G…	27	Bax;Coq7;Cox8a;Fxn;Bloc1s1;Idh3g;Mt3;Pomc;Cisd1;Sdhc;Ndufb9;Cox20;Ndufa7;Prelid1;Ndufb8;Uqcc2;Sdhb;Cox19;Ndufc2;Oxa1l;Gadd45gip1;Chchd10;Uqcc3;Prkcdbp;Idh3b;Ndufs6;Sco2
GO:0031305	blue	integral component of mitochondrial inner membrane	CC	0.25	20	4.59081	Timm17b;Timm23;Chchd6;Smdt1;Uqcc3;Ppox;Timm17a;Coa3;Chchd3;Ptpmt1;Ccdc109b;Etfdh;Apool;Apoo;Mcur1;Immt;Mcu;Tmem11;2410015M20Rik;Cox18	5	Timm17b;Timm23;Chchd6;Smdt1;Uqcc3
GO:0031970	blue	organelle envelope lumen	CC	0.148649	74	4.52124	Timm10b;Bloc1s1;Sod1;Capn10;Timm23;Arl2;Prelid1;Ndufb7;Uqcc2;Cox19;Chchd10;Ak2;Alox5;App;Bche;Cacybp;Cat;Cpox;Cycs;Cyct;Pdia3;Hsd3b2;Hsd3b3;Igf2r;Lyn;Myoc;Sorl1;Star;Dtymk;Tubb5;Hax1;Aifm1;Hrasls;Timm9;Timm8a1;Timm10;Thop1;Fam3b;Grasp;Ak3;Txnip;Park7;Ptges;Htra2;Chchd5;Slmo2;Stoml2;Diablo;Gatm;Nradd;Ccar1;Trap1;Coa4;Sirt5;Ndufa8;Micu2;Pink1;Triap1;Ggnbp1;Sdhaf3;Pnpt1;Chchd4;Opa1;Dusp18;Nln;Prelid…	11	Timm10b;Bloc1s1;Sod1;Capn10;Timm23;Arl2;Prelid1;Ndufb7;Uqcc2;Cox19;Chchd10
GO:0009060	blue	aerobic respiration	BP	0.166667	54	4.51614	Fxn;Bloc1s1;Idh3g;Sdhc;Cox20;Sdhb;Cox19;Oxa1l;Idh3b;Aco1;Aco2;Actn3;Adsl;Bnip3;Cat;Cbfa2t3;Cox4i1;Cs;Fh1;Hif1a;Idh1;Mdh2;Mdh1;COX1;COX3;Ndufv1;Ogdh;Pdha1;Sucla2;Suclg2;Uqcrc1;Suclg1;Sirt3;Chchd5;Sdhd;Sdha;Uqcrc2;Mtfr1;Idh3a;Pdhb;Cox10;Mtfr2;Pmpcb;Pank2;Mdh1b;Mtfr1l;Dlst;Cox4i2;Dhtkd1;Dlat;Ogdhl;4933405O20Rik;Vcp;Idh2	9	Fxn;Bloc1s1;Idh3g;Sdhc;Cox20;Sdhb;Cox19;Oxa1l;Idh3b
GO:1903707	blue	negative regulation of hemopoiesis	BP	0.123967	121	4.44125	Cdkn2a;Flt3;Hlx;Tob2;Hist1h4h;Fstl3;Hist1h4c;Hist1h4d;Hist1h4f;Hist1h4i;Hist1h4j;Hist1h4k;Hist1h4n;Hist1h4a;Hist1h4b;Bcl6;Bmp4;C1qc;Ctnnb1;Runx1;Ctla4;Cd44;Cdk6;Dll1;Erbb2;Dtx1;Gabpa;Gata2;Gli3;H2-M3;Hes1;Foxj1;Hmgb3;Hoxa5;Hoxa7;Prmt1;Id2;Ifnb1;Ihh;Cd74;Il4;Il4ra;Inpp5d;Irf1;Jak3;Mafb;Ldb1;Lmo2;Anxa1;Lyn;Meis1;Meis2;Myc;Nf1;Nfe2l2;Nfkbia;Nme1;Nme2;Notch1;Pik3r1;Ptk2b;Ptpn2;Rara;Apcs;Foxp3;Sfrp1;S…	15	Cdkn2a;Flt3;Hlx;Tob2;Hist1h4h;Fstl3;Hist1h4c;Hist1h4d;Hist1h4f;Hist1h4i;Hist1h4j;Hist1h4k;Hist1h4n;Hist1h4a;Hist1h4b
GO:0031304	blue	intrinsic component of mitochondrial inner membrane	CC	0.238095	21	4.43421	Timm17b;Timm23;Chchd6;Smdt1;Uqcc3;Ppox;Timm17a;Coa3;Chchd3;Ptpmt1;Ccdc109b;Etfdh;Apool;Apoo;Dusp18;Mcur1;Immt;Mcu;Tmem11;2410015M20Rik;Cox18	5	Timm17b;Timm23;Chchd6;Smdt1;Uqcc3
GO:0009144	blue	purine nucleoside triphosphate metabolic process	BP	0.104712	191	4.26736	Bad;Tspo;Coq7;Cox8a;Fxn;Guk1;Dguok;Atp5l;Sdhc;Ndufb9;Ndufa7;Atp5e;Ndufb8;Uqcc2;Ndufc2;Nme3;Gadd45gip1;Chchd10;Uqcc3;Atp5g3;Actn3;Ada;Adcyap1;Adk;Ak1;Ak2;Ak4;Aldoa;Aldoc;Ampd3;Apoc3;Rhoa;Atp1b1;Atp5a1;Atp5b;Atp5c1;Atp5f1;Atp5g1;Atp5j;Atp5k;Atp6v1a;Atp6v1b2;Atp6v0a1;Atp7a;Atpif1;Bdnf;Bpgm;Cbfa2t3;Entpd1;Entpd5;Cox4i1;Cox5a;Cycs;Cyct;Dld;Eno2;Eno3;Fbp1;Galt;Gapdh;Gapdhs;Gbas;Gpd1;Galk1;Gnai3;Gpi1;Hi…	20	Bad;Tspo;Coq7;Cox8a;Fxn;Guk1;Dguok;Atp5l;Sdhc;Ndufb9;Ndufa7;Atp5e;Ndufb8;Uqcc2;Ndufc2;Nme3;Gadd45gip1;Chchd10;Uqcc3;Atp5g3
GO:0009141	blue	nucleoside triphosphate metabolic process	BP	0.101449	207	4.21091	Bad;Tspo;Coq7;Cox8a;Fxn;Guk1;Dguok;Atp5l;Sdhc;Ndufb9;Ndufa7;Dctpp1;Atp5e;Ndufb8;Uqcc2;Ndufc2;Nme3;Gadd45gip1;Chchd10;Uqcc3;Atp5g3;Actn3;Ada;Adcyap1;Adk;Ak1;Ak2;Ak4;Aldoa;Aldoc;Ampd3;Apoc3;Rhoa;Atp1b1;Atp5a1;Atp5b;Atp5c1;Atp5f1;Atp5g1;Atp5j;Atp5k;Atp6v1a;Atp6v1b2;Atp6v0a1;Atp7a;Atpif1;Bdnf;Bpgm;Cbfa2t3;Entpd1;Entpd5;Cox4i1;Cox5a;Cycs;Cyct;Dld;Eno2;Eno3;Fbp1;Galt;Gapdh;Gapdhs;Gbas;Gpd1;Galk1;Gnai3;…	21	Bad;Tspo;Coq7;Cox8a;Fxn;Guk1;Dguok;Atp5l;Sdhc;Ndufb9;Ndufa7;Dctpp1;Atp5e;Ndufb8;Uqcc2;Ndufc2;Nme3;Gadd45gip1;Chchd10;Uqcc3;Atp5g3
GO:0009205	blue	purine ribonucleoside triphosphate metabolic process	BP	0.103825	183	4.11636	Bad;Tspo;Coq7;Cox8a;Fxn;Guk1;Atp5l;Sdhc;Ndufb9;Ndufa7;Atp5e;Ndufb8;Uqcc2;Ndufc2;Nme3;Gadd45gip1;Chchd10;Uqcc3;Atp5g3;Actn3;Adcyap1;Ak1;Ak2;Ak4;Aldoa;Aldoc;Ampd3;Apoc3;Rhoa;Atp1b1;Atp5a1;Atp5b;Atp5c1;Atp5f1;Atp5g1;Atp5j;Atp5k;Atp6v1a;Atp6v1b2;Atp6v0a1;Atp7a;Atpif1;Bdnf;Bpgm;Cbfa2t3;Entpd1;Entpd5;Cox4i1;Cox5a;Cycs;Cyct;Dld;Eno2;Eno3;Fbp1;Galt;Gapdh;Gapdhs;Gbas;Gpd1;Galk1;Gnai3;Gpi1;Hif1a;Hk1;Hk2;Hs…	19	Bad;Tspo;Coq7;Cox8a;Fxn;Guk1;Atp5l;Sdhc;Ndufb9;Ndufa7;Atp5e;Ndufb8;Uqcc2;Ndufc2;Nme3;Gadd45gip1;Chchd10;Uqcc3;Atp5g3
GO:0046034	blue	ATP metabolic process	BP	0.105263	171	4.07121	Bad;Tspo;Coq7;Cox8a;Fxn;Guk1;Atp5l;Sdhc;Ndufb9;Ndufa7;Atp5e;Ndufb8;Uqcc2;Ndufc2;Gadd45gip1;Chchd10;Uqcc3;Atp5g3;Actn3;Adcyap1;Ak1;Ak2;Ak4;Aldoa;Aldoc;Ampd3;Apoc3;Rhoa;Atp1b1;Atp5a1;Atp5b;Atp5c1;Atp5f1;Atp5g1;Atp5j;Atp5k;Atp6v1a;Atp6v1b2;Atp6v0a1;Atp7a;Atpif1;Bdnf;Bpgm;Cbfa2t3;Entpd1;Entpd5;Cox4i1;Cox5a;Cycs;Cyct;Dld;Eno2;Eno3;Fbp1;Galt;Gapdh;Gapdhs;Gbas;Gpd1;Galk1;Gpi1;Hif1a;Hk1;Hk2;Hspa8;Htr2a;I…	18	Bad;Tspo;Coq7;Cox8a;Fxn;Guk1;Atp5l;Sdhc;Ndufb9;Ndufa7;Atp5e;Ndufb8;Uqcc2;Ndufc2;Gadd45gip1;Chchd10;Uqcc3;Atp5g3
GO:0009199	blue	ribonucleoside triphosphate metabolic process	BP	0.102151	186	4.0367	Bad;Tspo;Coq7;Cox8a;Fxn;Guk1;Atp5l;Sdhc;Ndufb9;Ndufa7;Atp5e;Ndufb8;Uqcc2;Ndufc2;Nme3;Gadd45gip1;Chchd10;Uqcc3;Atp5g3;Actn3;Adcyap1;Ak1;Ak2;Ak4;Aldoa;Aldoc;Ampd3;Apoc3;Rhoa;Atp1b1;Atp5a1;Atp5b;Atp5c1;Atp5f1;Atp5g1;Atp5j;Atp5k;Atp6v1a;Atp6v1b2;Atp6v0a1;Atp7a;Atpif1;Bdnf;Bpgm;Cbfa2t3;Entpd1;Entpd5;Cox4i1;Cox5a;Cycs;Cyct;Dld;Eno2;Eno3;Fbp1;Galt;Gapdh;Gapdhs;Gbas;Gpd1;Galk1;Gnai3;Gpi1;Hif1a;Hk1;Hk2;Hs…	19	Bad;Tspo;Coq7;Cox8a;Fxn;Guk1;Atp5l;Sdhc;Ndufb9;Ndufa7;Atp5e;Ndufb8;Uqcc2;Ndufc2;Nme3;Gadd45gip1;Chchd10;Uqcc3;Atp5g3
GO:0036442	blue	hydrogen-exporting ATPase activity	MF	0.208333	24	4.01884	Atp6v0e;Atp5l;Atp6v1f;Atp5e;Atp6v0b;Atp5a1;Atp5b;Atp5c1;Atp6v1a;Atp6v0d1;Atp6v1e1;Atp6v0a1;Atp6v0c;Atp6v0a2;Tcirg1;Atp6ap1;Atp5d;Atp6v1g2;Atp6v1g1;Atp6v1c1;Atp6v1c2;Atp6v0e2;Atp6v1h;Atp6v0a4	5	Atp6v0e;Atp5l;Atp6v1f;Atp5e;Atp6v0b
GO:0051537	blue	2 iron, 2 sulfur cluster binding	MF	0.208333	24	4.01884	Fdx1;Fxn;Cisd1;Sdhb;AK157302;Aox1;Cmah;Fech;Xdh;Iscu;Uqcrfs1;Cisd2;Fdx1l;Isca1;Glrx2;Aifm3;Ndufv2;Glrx5;Isca2;Ciapin1;Aox2;Cisd3;Rfesd;Ndufs1	5	Fdx1;Fxn;Cisd1;Sdhb;AK157302
GO:0090199	blue	regulation of release of cytochrome c from mitochondria	BP	0.166667	42	3.98146	Bad;Bax;Fxn;Gpx1;Prelid1;Nol3;Parl;Akt1;Bak1;Bcl2l1;Bid;Bik;Bcl2l11;Bnip3;Cideb;Fas;Hgf;Igf1;Lmna;Mmp9;Plaur;Tnfsf10;Trp53;Park2;Pla2g6;Psmd10;Higd1a;Pdcd5;Mllt11;Moap1;Pycard;Apopt1;Pink1;Triap1;Fam162a;Dnm1l;Opa1;Gper1;Ppif;Bbc3;Bmf;Arrb2	7	Bad;Bax;Fxn;Gpx1;Prelid1;Nol3;Parl
GO:0003923	blue	GPI-anchor transamidase activity	MF	0.171429	35	3.77335	Gpaa1;Abhd8;Hint2;Abhd16a;Abhd17a;Mblac1;Dffb;Hint1;Ndst1;Mest;Ndst2;Rbbp9;Pnkd;Ndst4;Aptx;Hint3;Nudt13;Fahd2a;Abhd14a;Abhd11;Abhd13;Abhd17c;Mblac2;Dcp1a;Abhd14b;Pigt;Ndst3;Abhd4;Lactb2;Abhd17b;Pigu;Abhd16b;Pigs;Dcp1b;Pigk	6	Gpaa1;Abhd8;Hint2;Abhd16a;Abhd17a;Mblac1
GO:0042278	blue	purine nucleoside metabolic process	BP	0.0883534	249	3.5941	Bad;Tspo;Coq7;Cox8a;Fxn;Guk1;Pemt;Dguok;Atp5l;Sdhc;Ndufb9;Ndufa7;Atp5e;Ndufb8;Uqcc2;Ndufc2;Nme3;Gadd45gip1;Chchd10;Uqcc3;Macrod1;Atp5g3;Actn3;Ada;Adcyap1;Adk;Adsl;Adssl1;Adss;Ak1;Ak2;Ak4;Aldoa;Aldoc;Ampd3;Mat1a;Apoc3;Aprt;Rhoa;Atp1b1;Atp5a1;Atp5b;Atp5c1;Atp5f1;Atp5g1;Atp5j;Atp5k;Atp6v1a;Atp6v1b2;Atp6v0a1;Atp7a;Atpif1;Bdnf;Bpgm;Cbfa2t3;Entpd1;Entpd5;Cox4i1;Cox5a;Cycs;Cyct;Dld;Dnmt1;Dnmt3a;Dnmt3b;E…	22	Bad;Tspo;Coq7;Cox8a;Fxn;Guk1;Pemt;Dguok;Atp5l;Sdhc;Ndufb9;Ndufa7;Atp5e;Ndufb8;Uqcc2;Ndufc2;Nme3;Gadd45gip1;Chchd10;Uqcc3;Macrod1;Atp5g3
GO:0002244	blue	hematopoietic progenitor cell differentiation	BP	0.0987654	162	3.55039	Flt3;Hoxb3;Cited2;Sox4;Zfp385a;Hist1h4h;Fstl3;Hist1h4c;Hist1h4d;Hist1h4f;Hist1h4i;Hist1h4j;Hist1h4k;Hist1h4n;Hist1h4a;Hist1h4b;Abi1;Ap2a2;Bcl2;Bmp4;Runx1;Cdk6;Cebpd;Eef2;Ercc2;Fli1;Flt1;Fst;Slc37a4;Gabpa;Gata1;Gata2;Gata3;Ptpn6;Hes1;Hoxb4;Prmt1;Hyal2;Inhba;Kcnab2;Kdr;Kit;Mef2c;Meis1;Foxc1;Mlf1;Nfe2l2;Notch1;Pdcd2;Pdgfra;Pip4k2a;Med1;Prkdc;Eif2ak2;Psen1;Psen2;Ptpn11;Sirpa;Ptprc;Ptprz1;Rest;Scin;Sp…	16	Flt3;Hoxb3;Cited2;Sox4;Zfp385a;Hist1h4h;Fstl3;Hist1h4c;Hist1h4d;Hist1h4f;Hist1h4i;Hist1h4j;Hist1h4k;Hist1h4n;Hist1h4a;Hist1h4b
GO:0009123	blue	nucleoside monophosphate metabolic process	BP	0.092233	206	3.54209	Bad;Tspo;Coq7;Cox8a;Fxn;Guk1;Dguok;Atp5l;Sdhc;Ndufb9;Ndufa7;Atp5e;Ndufb8;Uqcc2;Ndufc2;Gadd45gip1;Chchd10;Uqcc3;Atp5g3;Actn3;Ada;Adcyap1;Adsl;Adssl1;Adss;Ak1;Ak2;Ak4;Aldoa;Aldoc;Ampd3;Apoc3;Rhoa;Atp1b1;Atp5a1;Atp5b;Atp5c1;Atp5f1;Atp5g1;Atp5j;Atp5k;Atp6v1a;Atp6v1b2;Atp6v0a1;Atp7a;Atpif1;Bdnf;Bpgm;Cbfa2t3;Entpd1;Entpd5;Cox4i1;Cox5a;Cycs;Cyct;Dck;Dld;Eno2;Eno3;Fbp1;Galt;Gapdh;Gapdhs;Gart;Gbas;Gpd1;Ga…	19	Bad;Tspo;Coq7;Cox8a;Fxn;Guk1;Dguok;Atp5l;Sdhc;Ndufb9;Ndufa7;Atp5e;Ndufb8;Uqcc2;Ndufc2;Gadd45gip1;Chchd10;Uqcc3;Atp5g3
GO:0010823	blue	negative regulation of mitochondrion organization	BP	0.157895	38	3.51882	Tspo;Fxn;Gpx1;Prelid1;Nol3;Parl;Akt1;Slc25a5;Bcl2l1;Bnip3;Hgf;Ier3;Igf1;Lig3;Lmna;Ppargc1a;Trp53;Vat1;Park2;Acaa2;Psmd10;Higd1a;Lrrk2;Oma1;Bag4;Mul1;Pink1;Triap1;Opa1;Slc35f6;Sirt4;Malsu1;Mpv17l;Pid1;Ppif;Flcn;Arrb2;Tigar	6	Tspo;Fxn;Gpx1;Prelid1;Nol3;Parl
GO:0009167	blue	purine ribonucleoside monophosphate metabolic process	BP	0.0932642	193	3.49848	Bad;Tspo;Coq7;Cox8a;Fxn;Guk1;Atp5l;Sdhc;Ndufb9;Ndufa7;Atp5e;Ndufb8;Uqcc2;Ndufc2;Gadd45gip1;Chchd10;Uqcc3;Atp5g3;Actn3;Ada;Adcyap1;Adsl;Adssl1;Adss;Ak1;Ak2;Ak4;Aldoa;Aldoc;Ampd3;Apoc3;Rhoa;Atp1b1;Atp5a1;Atp5b;Atp5c1;Atp5f1;Atp5g1;Atp5j;Atp5k;Atp6v1a;Atp6v1b2;Atp6v0a1;Atp7a;Atpif1;Bdnf;Bpgm;Cbfa2t3;Entpd1;Entpd5;Cox4i1;Cox5a;Cycs;Cyct;Dld;Eno2;Eno3;Fbp1;Galt;Gapdh;Gapdhs;Gart;Gbas;Gpd1;Galk1;Gpi1;H…	18	Bad;Tspo;Coq7;Cox8a;Fxn;Guk1;Atp5l;Sdhc;Ndufb9;Ndufa7;Atp5e;Ndufb8;Uqcc2;Ndufc2;Gadd45gip1;Chchd10;Uqcc3;Atp5g3
GO:0009126	blue	purine nucleoside monophosphate metabolic process	BP	0.0927835	194	3.47431	Bad;Tspo;Coq7;Cox8a;Fxn;Guk1;Atp5l;Sdhc;Ndufb9;Ndufa7;Atp5e;Ndufb8;Uqcc2;Ndufc2;Gadd45gip1;Chchd10;Uqcc3;Atp5g3;Actn3;Ada;Adcyap1;Adsl;Adssl1;Adss;Ak1;Ak2;Ak4;Aldoa;Aldoc;Ampd3;Apoc3;Rhoa;Atp1b1;Atp5a1;Atp5b;Atp5c1;Atp5f1;Atp5g1;Atp5j;Atp5k;Atp6v1a;Atp6v1b2;Atp6v0a1;Atp7a;Atpif1;Bdnf;Bpgm;Cbfa2t3;Entpd1;Entpd5;Cox4i1;Cox5a;Cycs;Cyct;Dld;Eno2;Eno3;Fbp1;Galt;Gapdh;Gapdhs;Gart;Gbas;Gpd1;Galk1;Gpi1;H…	18	Bad;Tspo;Coq7;Cox8a;Fxn;Guk1;Atp5l;Sdhc;Ndufb9;Ndufa7;Atp5e;Ndufb8;Uqcc2;Ndufc2;Gadd45gip1;Chchd10;Uqcc3;Atp5g3
GO:0040029	blue	regulation of gene expression, epigenetic	BP	0.0969697	165	3.46874	Gpx1;Hist2h2aa1;Cbx8;Msl3l2;Wtip;H2afj;Hist1h2ae;Hist1h2ag;Hist1h2ak;Hist1h2an;Hist1h2ab;Hist1h2af;Hist2h2ac;Hist2h2aa2;Hist1h2ao;Hist1h2al;Aicda;Apobec1;Brca1;Ctnnb1;Cdc45;Chek1;Ctcf;Dnmt3a;Dnmt3b;Eed;Epc1;Drosha;Ezh2;Nr3c1;Hdac2;Hdac5;Hdac6;Hells;H2afx;Ajuba;Kcnq1;Klf2;Mbd1;Mbd2;Mbd3;Mecp2;Mov10;Msl3;Nfkb1;Uhrf1;Padi2;Phf2;Rbm3;Rbm4;Upf1;Trim27;Slc50a1;Rlim;Spi1;Sin3a;Smarca4;Eif1;Suv39h1;Tarbp…	16	Gpx1;Hist2h2aa1;Cbx8;Msl3l2;Wtip;H2afj;Hist1h2ae;Hist1h2ag;Hist1h2ak;Hist1h2an;Hist1h2ab;Hist1h2af;Hist2h2ac;Hist2h2aa2;Hist1h2ao;Hist1h2al
GO:0022627	blue	cytosolic small ribosomal subunit	CC	0.153846	39	3.43968	Rps29;Rps27;Rps4l;Rps10;Rps13;Hba-a2;Ddx3x;Fau;Hba-a1;Rpsa;Eif2d;Rps2;Rps12;Rps14;Rps15;Rps16;Rps17;Rps18;Rps19;Rps24;Rps3a1;Rps4x;Rps5;Rps6;Rps7;Rps8;Rps3;Rps11;Rps26;Rps28;Rps23;Rps21;Rps20;Rps27l;Mcts1;Rps25;Rps9;Rps27a;Rps15a	6	Rps29;Rps27;Rps4l;Rps10;Rps13;Hba-a2
GO:0009161	blue	ribonucleoside monophosphate metabolic process	BP	0.0918367	196	3.42642	Bad;Tspo;Coq7;Cox8a;Fxn;Guk1;Atp5l;Sdhc;Ndufb9;Ndufa7;Atp5e;Ndufb8;Uqcc2;Ndufc2;Gadd45gip1;Chchd10;Uqcc3;Atp5g3;Actn3;Ada;Adcyap1;Adsl;Adssl1;Adss;Ak1;Ak2;Ak4;Aldoa;Aldoc;Ampd3;Apoc3;Rhoa;Atp1b1;Atp5a1;Atp5b;Atp5c1;Atp5f1;Atp5g1;Atp5j;Atp5k;Atp6v1a;Atp6v1b2;Atp6v0a1;Atp7a;Atpif1;Bdnf;Bpgm;Cbfa2t3;Entpd1;Entpd5;Cox4i1;Cox5a;Cycs;Cyct;Dld;Eno2;Eno3;Fbp1;Galt;Gapdh;Gapdhs;Gart;Gbas;Gpd1;Galk1;Gpi1;H…	18	Bad;Tspo;Coq7;Cox8a;Fxn;Guk1;Atp5l;Sdhc;Ndufb9;Ndufa7;Atp5e;Ndufb8;Uqcc2;Ndufc2;Gadd45gip1;Chchd10;Uqcc3;Atp5g3
GO:0009116	blue	nucleoside metabolic process	BP	0.0833333	276	3.37094	Bad;Tspo;Coq7;Cox8a;Fxn;Guk1;Pemt;Dguok;Atp5l;Sdhc;Ndufb9;Ndufa7;Atp5e;Ndufb8;Uqcc2;Ndufc2;Tymp;Nme3;Gadd45gip1;Chchd10;Uqcc3;Macrod1;Atp5g3;Actn3;Ada;Adcyap1;Adk;Adsl;Adssl1;Adss;Aicda;Ak1;Ak2;Ak4;Aldoa;Aldoc;Ampd3;Mat1a;Apobec1;Apoc3;Aprt;Rhoa;Atp1b1;Atp5a1;Atp5b;Atp5c1;Atp5f1;Atp5g1;Atp5j;Atp5k;Atp6v1a;Atp6v1b2;Atp6v0a1;Atp7a;Atpif1;Bdnf;Bpgm;Cbfa2t3;Entpd1;Entpd5;Cox4i1;Cox5a;Cycs;Cyct;Dck;Dl…	23	Bad;Tspo;Coq7;Cox8a;Fxn;Guk1;Pemt;Dguok;Atp5l;Sdhc;Ndufb9;Ndufa7;Atp5e;Ndufb8;Uqcc2;Ndufc2;Tymp;Nme3;Gadd45gip1;Chchd10;Uqcc3;Macrod1;Atp5g3
GO:0016469	blue	proton-transporting two-sector ATPase complex	CC	0.15	40	3.36309	Atp6v0e;Atp5l;Atp6v1f;Atp5e;Atp6v0b;Atp5g3;Atp5a1;Atp5b;Atp5c1;Atp5f1;Atp5g1;Atp5j;Atp5k;Atp6v1a;Atp6v1b2;Atp6v0d1;Atp6v1e1;Atp6v0a1;Atpif1;Atp6v0c;ATP6;ATP8;Atp6v0a2;Tcirg1;Atp5o;Atp6ap1;Atp5j2;Atp5d;Atp6v1g2;Atp6v1g1;Atp6v1c1;Usmg5;Atp5s;Atp6v1c2;Atp5h;Atp6v1d;Atp6v0e2;Atp6v1h;Atp6v0a4;Atp6v0d2	6	Atp6v0e;Atp5l;Atp6v1f;Atp5e;Atp6v0b;Atp5g3
GO:1902600	blue	hydrogen ion transmembrane transport	BP	0.137255	51	3.34766	Atp6v0e;Cox8a;Atp5l;Atp6v1f;Atp5e;Atp6v0b;Atp5g3;Atp1a1;Atp4a;Atp5a1;Atp5b;Atp5c1;Atp5f1;Atp5g1;Atp5j;Atp5k;Atp6v1a;Atp6v1b2;Atp6v0d1;Atp6v1e1;Atp6v0a1;Atp6v0c;Cox5a;ATP6;ATP8;Ndufa4;Slc9a1;Atp6v0a2;Tcirg1;Atp1a4;Atp5o;Slc46a1;Atp6ap1;Atp5d;Cox7b;Atp6v1c1;Stoml2;Slc47a1;Atp6v1c2;Cox10;Atp5h;Atp6v0e2;Cox4i2;Slc4a10;Atp1a2;Atp6v1h;Atp6v0a4;Slc36a1;Cox15;Atp1a3;Atp6v0d2	7	Atp6v0e;Cox8a;Atp5l;Atp6v1f;Atp5e;Atp6v0b;Atp5g3
GO:0060968	blue	regulation of gene silencing	BP	0.146341	41	3.28892	Hist1h3g;Wtip;Hist1h3e;Hist1h3h;Hist1h3i;Hist2h3b;Aicda;Apobec1;Cdc45;Cdk2;Hist2h3c1;Ajuba;Nfkb1;Uhrf1;Phf2;Sin3a;Tert;Tgfb1;Uty;Limd1;Tet1;Adar;Atad2;Mier1;Xpo5;Bcdin3d;Pum1;Pum2;Lin28a;Sirt1;Hist2h3c2;Uhrf2;Dnd1;Tnrc6c;Zc3h12a;Hist1h3d;Hist1h3b;Phf8;Atad2b;Hist1h3a;Trim71	6	Hist1h3g;Wtip;Hist1h3e;Hist1h3h;Hist1h3i;Hist2h3b
GO:0032543	blue	mitochondrial translation	BP	0.134615	52	3.28609	Mrpl23;Ndufa7;Uqcc2;Mrpl57;Mrps11;Ict1;Mrps6;C1qbp;Hars;Mrps12;Mrpl2;Gfm1;Coa3;Mtg2;Uqcc1;Noa1;Mrps25;Rmnd1;Mrps16;Mrps17;Mrps21;Tsfm;Mrps15;Mrpl51;Mrps18b;Ears2;Mrrf;Mrps18a;Mrpl44;Ptcd3;Yars2;Nsun4;Lrpprc;2810006K23Rik;Mrpl47;Malsu1;Mtif3;Qrsl1;Mtif2;Mrps34;Mrpl16;Mtrf1l;Rars2;Mrps2;Mtrf1;Mtg1;Aars2;Gatb;Tufm;Mpv17l2;Gfm2;Gatc	7	Mrpl23;Ndufa7;Uqcc2;Mrpl57;Mrps11;Ict1;Mrps6
GO:0052770	blue	coenzyme F390-A hydrolase activity	MF	0.16129	31	3.27121	Abhd8;Hint2;Abhd16a;Abhd17a;Mblac1;Dffb;Hint1;Ndst1;Mest;Ndst2;Rbbp9;Pnkd;Ndst4;Aptx;Hint3;Nudt13;Fahd2a;Abhd14a;Abhd11;Abhd13;Abhd17c;Mblac2;Dcp1a;Abhd14b;Ndst3;Abhd4;Lactb2;Abhd17b;Abhd16b;Dcp1b;Pigk	5	Abhd8;Hint2;Abhd16a;Abhd17a;Mblac1
GO:0052771	blue	coenzyme F390-G hydrolase activity	MF	0.16129	31	3.27121	Abhd8;Hint2;Abhd16a;Abhd17a;Mblac1;Dffb;Hint1;Ndst1;Mest;Ndst2;Rbbp9;Pnkd;Ndst4;Aptx;Hint3;Nudt13;Fahd2a;Abhd14a;Abhd11;Abhd13;Abhd17c;Mblac2;Dcp1a;Abhd14b;Ndst3;Abhd4;Lactb2;Abhd17b;Abhd16b;Dcp1b;Pigk	5	Abhd8;Hint2;Abhd16a;Abhd17a;Mblac1
GO:0009055	blue	electron carrier activity	MF	0.125	64	3.26555	Cox6a1;Cox8a;Fdx1;Sdhc;Ndufa12;Uqcr11;Sdhb;Coa6;Acadl;Acadm;Acadvl;Acads;Acox1;Aox1;Cox4i1;Cox5a;Cox6a2;Cox6c;Cox7a1;Cox7a2;Cox7c;Cyba;Cybb;Cycs;Cyct;COX1;COX2;COX3;CYTB;Ndufa4;Por;Cox7a2l;Surf1;Xdh;Glrx3;Ivd;Cox7b;Cyc1;Etfdh;Acadsb;Acad8;Fdx1l;Glrx2;Cox10;Acad10;Glrx5;Sh3bgrl3;Acoxl;Ndufaf2;Acox3;Cox4i2;Glrx;Ptges2;Acad11;Cox6b1;Etfb;Etfa;Aox2;Cox15;Ndufs1;Acad9;Txnrd3;Gcdh;Cox6b2	8	Cox6a1;Cox8a;Fdx1;Sdhc;Ndufa12;Uqcr11;Sdhb;Coa6
GO:1901657	blue	glycosyl compound metabolic process	BP	0.0801394	287	3.16857	Bad;Tspo;Coq7;Cox8a;Fxn;Guk1;Pemt;Dguok;Atp5l;Sdhc;Ndufb9;Ndufa7;Atp5e;Ndufb8;Uqcc2;Ndufc2;Tymp;Nme3;Gadd45gip1;Chchd10;Uqcc3;Macrod1;Atp5g3;Actn3;Ada;Adcyap1;Adk;Adsl;Adssl1;Adss;Aicda;Ak1;Ak2;Ak4;Aldoa;Aldoc;Akr1b3;Ampd3;Mat1a;Apobec1;Apoc3;Aprt;Rhoa;Atp1b1;Atp5a1;Atp5b;Atp5c1;Atp5f1;Atp5g1;Atp5j;Atp5k;Atp6v1a;Atp6v1b2;Atp6v0a1;Atp7a;Atpif1;Bdnf;Bpgm;Cbfa2t3;Entpd1;Entpd5;Cox4i1;Cox5a;Cycs;Cyct…	23	Bad;Tspo;Coq7;Cox8a;Fxn;Guk1;Pemt;Dguok;Atp5l;Sdhc;Ndufb9;Ndufa7;Atp5e;Ndufb8;Uqcc2;Ndufc2;Tymp;Nme3;Gadd45gip1;Chchd10;Uqcc3;Macrod1;Atp5g3
GO:0005198	blue	structural molecule activity	MF	0.0715789	475	3.1631	Cldn3;Clta;Krt10;Lor;Nup62;Mrpl23;Rps29;Mrpl17;Mrps7;Rpl36;Rplp1;Mrpl12;Rps27;Cope;Mrps24;Rps4l;Ndufa7;Lamtor1;Rps10;Rplp2;Mrpl46;Mrpl57;Mrps11;Rps13;Mrpl14;Mrpl28;Mrpl27;Mrpl34;Mrpl36;Mrpl43;Mrps6;Mrpl22;BC029214;Gm5218;Actg1;Add1;Add2;Akap1;Amelx;Ank3;Slc25a4;Slc25a5;Rplp0;Arpc1b;Axin1;Bfsp1;Bglap3;Capn3;Ctnna1;Ctnna2;Cav1;Cav2;Cldn1;Cldn2;Cldn4;Cldn5;Col11a1;Col11a2;Col15a1;Col18a1;Col2a1;Col3…	34	Cldn3;Clta;Krt10;Lor;Nup62;Mrpl23;Rps29;Mrpl17;Mrps7;Rpl36;Rplp1;Mrpl12;Rps27;Cope;Mrps24;Rps4l;Ndufa7;Lamtor1;Rps10;Rplp2;Mrpl46;Mrpl57;Mrps11;Rps13;Mrpl14;Mrpl28;Mrpl27;Mrpl34;Mrpl36;Mrpl43;Mrps6;Mrpl22;BC029214;Gm5218
GO:0098687	blue	chromosomal region	CC	0.0786885	305	3.14167	Dapk3;H3f3a;Dctn3;Dynll1;Pmf1;Hist1h4h;Ten1;Cenpv;Hist1h3g;Hist1h3e;Hist1h3h;Hist1h3i;Hist2h3b;Hist1h4c;Hist1h4d;Hist1h4f;Hist1h4i;Hist1h4j;Hist1h4k;Hist1h4n;Hist1h2ak;Hist1h2ba;Hist1h4a;Hist1h4b;Parp1;Apc;Birc5;Atm;Blm;Brca2;Bub1;Bub1b;Bub3;Cbx1;Cbx3;Cbx5;Cdk1;Cdk2;Cebpb;Cenpa;Cenpb;Cenpc1;Chek1;Crebbp;Smc3;Ctcf;Daxx;Dctn1;Ddb1;Dmc1;Dync1i1;Dnmt1;Dnmt3a;Dnmt3b;Ercc1;Fen1;Xrcc6;Hist2h3c1;H3f3b;He…	24	Dapk3;H3f3a;Dctn3;Dynll1;Pmf1;Hist1h4h;Ten1;Cenpv;Hist1h3g;Hist1h3e;Hist1h3h;Hist1h3i;Hist2h3b;Hist1h4c;Hist1h4d;Hist1h4f;Hist1h4i;Hist1h4j;Hist1h4k;Hist1h4n;Hist1h2ak;Hist1h2ba;Hist1h4a;Hist1h4b
GO:1990542	blue	mitochondrial transmembrane transport	BP	0.151515	33	3.09716	Timm17b;Timm23;Ndufa13;Smdt1;Mpc2;Hsp90aa1;Hspa4;Timm17a;Timm44;Atp5o;Timm9;Timm10;Dnlz;Tomm40;Mpc1;Timm22;Pdcd5;Tomm7;Pam16;Timm50;Stoml2;Ccdc109b;Timm21;Tomm20;Samm50;Afg3l2;Slc25a33;Chchd4;Afg3l1;Mcu;Micu1;Tomm22;Tomm40l	5	Timm17b;Timm23;Ndufa13;Smdt1;Mpc2
GO:0001836	blue	release of cytochrome c from mitochondria	BP	0.125	56	3.05392	Bad;Bax;Fxn;Gpx1;Prelid1;Nol3;Parl;Akt1;Atp7a;Bak1;Bcl2;Bcl2a1a;Bcl2a1b;Bcl2a1d;Bcl2l1;Bid;Bik;Bcl2l11;Bnip3;Cck;Cideb;Fas;Hgf;Igf1;Jun;Lmna;Mmp9;Plaur;Sod2;Tnfsf10;Trp53;Mapk9;Park2;Pla2g6;Psmd10;Sfn;Higd1a;Pdcd5;Mllt11;Pmaip1;Moap1;Fis1;Timm50;Pycard;Apopt1;Pink1;Triap1;Fam162a;Dnm1l;Opa1;Gper1;Ppif;Ggct;Bbc3;Bmf;Arrb2	7	Bad;Bax;Fxn;Gpx1;Prelid1;Nol3;Parl
GO:0046128	blue	purine ribonucleoside metabolic process	BP	0.0816327	245	3.04039	Bad;Tspo;Coq7;Cox8a;Fxn;Guk1;Pemt;Atp5l;Sdhc;Ndufb9;Ndufa7;Atp5e;Ndufb8;Uqcc2;Ndufc2;Nme3;Gadd45gip1;Chchd10;Uqcc3;Atp5g3;Actn3;Ada;Adcyap1;Adk;Adsl;Adssl1;Adss;Ak1;Ak2;Ak4;Aldoa;Aldoc;Ampd3;Mat1a;Apoc3;Aprt;Rhoa;Atp1b1;Atp5a1;Atp5b;Atp5c1;Atp5f1;Atp5g1;Atp5j;Atp5k;Atp6v1a;Atp6v1b2;Atp6v0a1;Atp7a;Atpif1;Bdnf;Bpgm;Cbfa2t3;Entpd1;Entpd5;Cox4i1;Cox5a;Cycs;Cyct;Dld;Dnmt1;Dnmt3a;Dnmt3b;Eno2;Eno3;Fbp1;…	20	Bad;Tspo;Coq7;Cox8a;Fxn;Guk1;Pemt;Atp5l;Sdhc;Ndufb9;Ndufa7;Atp5e;Ndufb8;Uqcc2;Ndufc2;Nme3;Gadd45gip1;Chchd10;Uqcc3;Atp5g3
GO:0032592	blue	integral component of mitochondrial membrane	CC	0.130435	46	2.94967	Timm17b;Timm23;Chchd6;Smdt1;Oxa1l;Uqcc3;Bak1;Bid;Bnip3;Cpt1a;Dmpk;Gdap1;Ppox;Timm17a;Synj2bp;Coa3;Tomm40;Abcb10;Rhot1;Chchd3;Tomm7;Fis1;Ptpmt1;Ccdc109b;Etfdh;Fundc2;Mgarp;Tomm20;Apool;Apoo;Mul1;Pink1;Tmem70;Armcx3;Fundc1;Abcb6;Mcur1;Immt;Slc8b1;Rhot2;Mcu;Micu1;Tmem11;Tomm22;2410015M20Rik;Cox18	6	Timm17b;Timm23;Chchd6;Smdt1;Oxa1l;Uqcc3
GO:0022626	blue	cytosolic ribosome	CC	0.102041	98	2.9171	Rps29;Rpl36;Rps27;Repin1;Rps4l;Rps10;Rplp2;Rps13;Hba-a2;Gm5218;Apod;Rplp0;Ddx3x;Fau;Hba-a1;Rpsa;Eif2d;Rps2;Ppargc1a;Rpl10a;Rpl18;Rpl19;Rpl21;Rpl22;Rpl26;Rpl27;Rpl28;Rpl29;Rpl30;Rpl32;Rpl37a;Rpl36a;Rpl6;Rpl7;Rpl9;Rps12;Rps14;Rps15;Rps16;Rps17;Rps18;Rps19;Rps24;Rps3a1;Rps4x;Rps5;Rps6;Rps7;Rps8;Rpl13a;Rpl27a;Rpl8;Rps3;Eif2ak4;Rpl7a;Rps11;Nufip1;Rpl3;Rps26;Zfp622;Rps28;Naa10;Rpl35a;Rpl23;Rpl3l;Rpl7l1…	10	Rps29;Rpl36;Rps27;Repin1;Rps4l;Rps10;Rplp2;Rps13;Hba-a2;Gm5218
GO:0098573	blue	intrinsic component of mitochondrial membrane	CC	0.125	48	2.82671	Timm17b;Timm23;Chchd6;Smdt1;Oxa1l;Uqcc3;Bak1;Bid;Bnip3;Cpt1a;Dmpk;Gdap1;Ppox;Timm17a;Synj2bp;Coa3;Tomm40;Abcb10;Rhot1;Chchd3;Tomm7;Fis1;Ptpmt1;Ccdc109b;Etfdh;Fundc2;Mgarp;Tomm20;Apool;Apoo;Mul1;Pink1;Tmem70;Armcx3;Fundc1;Abcb6;Dusp18;Mcur1;Immt;Mfn2;Slc8b1;Rhot2;Mcu;Micu1;Tmem11;Tomm22;2410015M20Rik;Cox18	6	Timm17b;Timm23;Chchd6;Smdt1;Oxa1l;Uqcc3
GO:0051536	blue	iron-sulfur cluster binding	MF	0.112903	62	2.74177	Fdx1;Fxn;Cisd1;Sdhb;Ndufs7;Ndufs8;AK157302;Aco1;Aco2;Aox1;Cmah;Ercc2;Fech;Ndufv1;Nfs1;Nthl1;Pola1;Pold1;Pole;Prim2;Rev3l;Xdh;Nubp1;Nubp2;Glrx3;Mocs1;Nfu1;Rsad2;Ireb2;Iscu;Uqcrfs1;Etfdh;Cdk5rap1;Cisd2;Narfl;Fdx1l;Cdkal1;Isca1;Glrx2;Mutyh;Aifm3;Ndufv2;Glrx5;Exo5;Elp3;Isca2;Nubpl;Lias;Dpyd;Tyw1;Ciapin1;Aox2;Cisd3;Rfesd;Ndufs2;Ndufs1;Brip1;Rsad1;Abat;Rtel1;Ddx11;Dna2	7	Fdx1;Fxn;Cisd1;Sdhb;Ndufs7;Ndufs8;AK157302
GO:0051540	blue	metal cluster binding	MF	0.112903	62	2.74177	Fdx1;Fxn;Cisd1;Sdhb;Ndufs7;Ndufs8;AK157302;Aco1;Aco2;Aox1;Cmah;Ercc2;Fech;Ndufv1;Nfs1;Nthl1;Pola1;Pold1;Pole;Prim2;Rev3l;Xdh;Nubp1;Nubp2;Glrx3;Mocs1;Nfu1;Rsad2;Ireb2;Iscu;Uqcrfs1;Etfdh;Cdk5rap1;Cisd2;Narfl;Fdx1l;Cdkal1;Isca1;Glrx2;Mutyh;Aifm3;Ndufv2;Glrx5;Exo5;Elp3;Isca2;Nubpl;Lias;Dpyd;Tyw1;Ciapin1;Aox2;Cisd3;Rfesd;Ndufs2;Ndufs1;Brip1;Rsad1;Abat;Rtel1;Ddx11;Dna2	7	Fdx1;Fxn;Cisd1;Sdhb;Ndufs7;Ndufs8;AK157302
GO:0009119	blue	ribonucleoside metabolic process	BP	0.0763359	262	2.71817	Bad;Tspo;Coq7;Cox8a;Fxn;Guk1;Pemt;Atp5l;Sdhc;Ndufb9;Ndufa7;Atp5e;Ndufb8;Uqcc2;Ndufc2;Nme3;Gadd45gip1;Chchd10;Uqcc3;Atp5g3;Actn3;Ada;Adcyap1;Adk;Adsl;Adssl1;Adss;Aicda;Ak1;Ak2;Ak4;Aldoa;Aldoc;Ampd3;Mat1a;Apobec1;Apoc3;Aprt;Rhoa;Atp1b1;Atp5a1;Atp5b;Atp5c1;Atp5f1;Atp5g1;Atp5j;Atp5k;Atp6v1a;Atp6v1b2;Atp6v0a1;Atp7a;Atpif1;Bdnf;Bpgm;Cbfa2t3;Entpd1;Entpd5;Cox4i1;Cox5a;Cycs;Cyct;Dld;Dnmt1;Dnmt3a;Dnmt3b;E…	20	Bad;Tspo;Coq7;Cox8a;Fxn;Guk1;Pemt;Atp5l;Sdhc;Ndufb9;Ndufa7;Atp5e;Ndufb8;Uqcc2;Ndufc2;Nme3;Gadd45gip1;Chchd10;Uqcc3;Atp5g3
GO:0009206	blue	purine ribonucleoside triphosphate biosynthetic process	BP	0.12	50	2.70998	Atp5l;Atp5e;Nme3;Chchd10;Uqcc3;Atp5g3;Aldoa;Atp5a1;Atp5b;Atp5c1;Atp5f1;Atp5g1;Atp5j;Atp5k;Atp6v0a1;Entpd1;Gbas;ATP6;ATP8;Myc;Nme1;Nme2;Pkm;Pklr;Pnp;Ppargc1a;Stat3;Surf1;Tgfb1;Atp6v0a2;Tcirg1;Atp5o;Slc25a13;Park2;Ldhd;Nme6;Ak3;Nme4;Atp5j2;Atp5d;Stoml2;Atp5s;Atp5h;Nme5;Pid1;Atp6v0a4;Nme7;Flcn;Vcp;Ak9	6	Atp5l;Atp5e;Nme3;Chchd10;Uqcc3;Atp5g3
GO:0006399	blue	tRNA metabolic process	BP	0.0872483	149	2.70497	Dtd1;Osgep;Exosc7;Rpp21;Dalrd3;Urm1;Mocs3;Fars2;Gtpbp3;Lars2;Dus3l;Ctu1;Dtd2;Trdmt1;Fbl;Hsd17b10;Hars;Mettl1;Sars;Ssb;Vars;Wars;Farsb;Cars;Rtcb;Nsun2;Adat1;Polg2;Exosc9;Trmt10c;Rpp30;Ftsj1;Pus1;Wdr4;Qtrt1;Tsen34;1110008L16Rik;Pop4;Lage3;Exosc3;Dus2;Farsa;Thg1l;Tsen15;Uba5;Adat2;Trmt6;Ctu2;Trit1;Cdk5rap1;Pus3;Rpp14;Zbtb8os;Ears2;Alkbh8;Trmt112;Pop1;2700060E02Rik;Trmt12;Mto1;Elac2;Dus1l;Tyw5;Vars2;…	13	Dtd1;Osgep;Exosc7;Rpp21;Dalrd3;Urm1;Mocs3;Fars2;Gtpbp3;Lars2;Dus3l;Ctu1;Dtd2
GO:0009145	blue	purine nucleoside triphosphate biosynthetic process	BP	0.117647	51	2.65375	Atp5l;Atp5e;Nme3;Chchd10;Uqcc3;Atp5g3;Adk;Aldoa;Atp5a1;Atp5b;Atp5c1;Atp5f1;Atp5g1;Atp5j;Atp5k;Atp6v0a1;Entpd1;Gbas;ATP6;ATP8;Myc;Nme1;Nme2;Pkm;Pklr;Pnp;Ppargc1a;Stat3;Surf1;Tgfb1;Atp6v0a2;Tcirg1;Atp5o;Slc25a13;Park2;Ldhd;Nme6;Ak3;Nme4;Atp5j2;Atp5d;Stoml2;Atp5s;Atp5h;Nme5;Pid1;Atp6v0a4;Nme7;Flcn;Vcp;Ak9	6	Atp5l;Atp5e;Nme3;Chchd10;Uqcc3;Atp5g3
GO:0015992	blue	proton transport	BP	0.102564	78	2.62385	Atp6v0e;Cox8a;Atp5l;Atp6v1f;Atp5e;Atp6v0b;Atp5g3;Slc36a2;Slc25a4;Atp1a1;Atp4a;Atp5a1;Atp5b;Atp5c1;Atp5f1;Atp5g1;Atp5j;Atp5k;Atp6v1a;Atp6v1b2;Atp6v0d1;Atp6v1e1;Atp6v0a1;Atp6v0c;Cox5a;Drd3;Il4;ATP6;ATP8;CYTB;Ndufa4;Nnt;Slc11a2;Plcb1;Slc9a1;Atp6v0a2;Twist1;Ucp1;Slc9a3r1;Tcirg1;Atp1a4;Atp5o;Slc46a1;Atp6ap1;Chp1;Park7;Atp5j2;Tesc;Atp5d;Cox7b;Atp6v1g2;Atp6v1g1;Atp6v1c1;Stoml2;Slc47a1;Atp5s;Atp6v1c2;Cox…	8	Atp6v0e;Cox8a;Atp5l;Atp6v1f;Atp5e;Atp6v0b;Atp5g3;Slc36a2
GO:0009201	blue	ribonucleoside triphosphate biosynthetic process	BP	0.115385	52	2.59887	Atp5l;Atp5e;Nme3;Chchd10;Uqcc3;Atp5g3;Aldoa;Atp5a1;Atp5b;Atp5c1;Atp5f1;Atp5g1;Atp5j;Atp5k;Atp6v0a1;Entpd1;Gbas;ATP6;ATP8;Myc;Nme1;Nme2;Pkm;Pklr;Pnp;Ppargc1a;Stat3;Surf1;Tgfb1;Atp6v0a2;Tcirg1;Atp5o;Slc25a13;Park2;Ctps;Ldhd;Nme6;Ak3;Nme4;Atp5j2;Atp5d;Stoml2;Atp5s;Cad;Atp5h;Nme5;Pid1;Atp6v0a4;Nme7;Flcn;Vcp;Ak9	6	Atp5l;Atp5e;Nme3;Chchd10;Uqcc3;Atp5g3
GO:0006818	blue	hydrogen transport	BP	0.101266	79	2.58347	Atp6v0e;Cox8a;Atp5l;Atp6v1f;Atp5e;Atp6v0b;Atp5g3;Slc36a2;Slc25a4;Atp1a1;Atp4a;Atp5a1;Atp5b;Atp5c1;Atp5f1;Atp5g1;Atp5j;Atp5k;Atp6v1a;Atp6v1b2;Atp6v0d1;Atp6v1e1;Atp6v0a1;Atp6v0c;Cox5a;Drd3;Il4;ATP6;ATP8;CYTB;Ndufa4;Nnt;Slc11a2;Plcb1;Slc9a1;Atp6v0a2;Twist1;Ucp1;Slc9a3r1;Tcirg1;Atp1a4;Atp5o;Slc46a1;Atp6ap1;Chp1;Park7;Atp5j2;Tesc;Atp5d;Cox7b;Atp6v1g2;Atp6v1g1;Atp6v1c1;Stoml2;Slc47a1;Atp5s;Atp6v1c2;Cox…	8	Atp6v0e;Cox8a;Atp5l;Atp6v1f;Atp5e;Atp6v0b;Atp5g3;Slc36a2
GO:0097525	blue	spliceosomal snRNP complex	CC	0.113208	53	2.54528	Snrnp70;Txnl4a;Lsm4;Sf3b5;Snrpf;Snrpd2;Sf3a2;Sart1;Snrpc;Snrpb;Snrpb2;Snrpd1;Snrpe;Snrpn;Lsm2;Ccdc97;Snrpa;Ddx39b;Sart3;Prpf40b;Prpf40a;Sf3b6;Lsm7;Ppih;Lsm5;Zmat2;Snrnp40;Luc7l;Prpf18;Snrpd3;Sf3a1;Lsm3;Luc7l3;Snrpg;Phf5a;Prpf6;Snrpa1;Prpf31;Prpf4;Cd2bp2;Prpf3;Htatsf1;Ddx23;Lsm8;Lsm6;Sf3b1;Prpf8;Luc7l2;Rbmx2;Txnl4b;Sf3b2;Snrnp200;Prpf39	6	Snrnp70;Txnl4a;Lsm4;Sf3b5;Snrpf;Snrpd2
GO:0070265	blue	necrotic cell death	BP	0.121951	41	2.51523	Bax;Tspo;Mt3;Irf3;Nol3;Ahr;Slc25a4;Birc3;Birc2;Casp1;Casp8;Cav1;Cflar;Fadd;Fas;Fasl;Ripk1;Tnf;Traf2;Trp53;Rbck1;Map3k5;Map3k7;Mapk8;Hebp2;Ybx3;Ripk3;Trpm7;Sirt2;Alkbh7;Tmem123;Pgam5;Dnm1l;Cyld;Mlkl;Mgea5;Ppif;Pygl;Tlr3;Nlrp1a;Rnf31	5	Bax;Tspo;Mt3;Irf3;Nol3
GO:0006754	blue	ATP biosynthetic process	BP	0.119048	42	2.45257	Atp5l;Atp5e;Chchd10;Uqcc3;Atp5g3;Aldoa;Atp5a1;Atp5b;Atp5c1;Atp5f1;Atp5g1;Atp5j;Atp5k;Atp6v0a1;Entpd1;Gbas;ATP6;ATP8;Myc;Pkm;Pklr;Ppargc1a;Stat3;Surf1;Tgfb1;Atp6v0a2;Tcirg1;Atp5o;Slc25a13;Park2;Ldhd;Ak3;Atp5j2;Atp5d;Stoml2;Atp5s;Atp5h;Pid1;Atp6v0a4;Flcn;Vcp;Ak9	5	Atp5l;Atp5e;Chchd10;Uqcc3;Atp5g3
GO:0000422	blue	mitophagy	BP	0.079096	177	2.41117	Tspo;Cdc37;Cdkn2a;Cox8a;Bloc1s1;Capn10;Lsm4;Ndufb9;Map1lc3a;Snrpf;Eva1b;Tmem39b;Parl;Fancf;Adrb2;Anxa5;Atg5;Atp1b1;Atpif1;Bnip3l;Calca;Car7;Hapln1;Csnk2a2;Ctsk;Cttn;Eif2s1;Stom;Fancc;Fzd5;Slc37a4;Kat2a;Gdf5;Hc;Hdac6;Hif1a;Hk2;Kcnk3;Krt15;Cd93;Mdh1;Mstn;Map1a;Myh11;Myom1;Nme2;Nthl1;Sqstm1;Pik3ca;Ppy;Prkg1;Rpl28;Sfrp4;Slc1a3;Snrpb;Snrpd1;Srebf1;Srebf2;Stat2;Nr2c2;Trp53;U2af2;Ulk1;Vdac1;Zbtb17;Map2k…	14	Tspo;Cdc37;Cdkn2a;Cox8a;Bloc1s1;Capn10;Lsm4;Ndufb9;Map1lc3a;Snrpf;Eva1b;Tmem39b;Parl;Fancf
GO:0061726	blue	mitochondrion disassembly	BP	0.079096	177	2.41117	Tspo;Cdc37;Cdkn2a;Cox8a;Bloc1s1;Capn10;Lsm4;Ndufb9;Map1lc3a;Snrpf;Eva1b;Tmem39b;Parl;Fancf;Adrb2;Anxa5;Atg5;Atp1b1;Atpif1;Bnip3l;Calca;Car7;Hapln1;Csnk2a2;Ctsk;Cttn;Eif2s1;Stom;Fancc;Fzd5;Slc37a4;Kat2a;Gdf5;Hc;Hdac6;Hif1a;Hk2;Kcnk3;Krt15;Cd93;Mdh1;Mstn;Map1a;Myh11;Myom1;Nme2;Nthl1;Sqstm1;Pik3ca;Ppy;Prkg1;Rpl28;Sfrp4;Slc1a3;Snrpb;Snrpd1;Srebf1;Srebf2;Stat2;Nr2c2;Trp53;U2af2;Ulk1;Vdac1;Zbtb17;Map2k…	14	Tspo;Cdc37;Cdkn2a;Cox8a;Bloc1s1;Capn10;Lsm4;Ndufb9;Map1lc3a;Snrpf;Eva1b;Tmem39b;Parl;Fancf
GO:1903650	blue	negative regulation of cytoplasmic transport	BP	0.0909091	99	2.38239	Nfkbib;Pkig;Sox4;Ube2g2;Keap1;Snx3;Ubac2;Mrln;Nol3;Angpt1;Akap1;Apod;Axin2;Bard1;Bcl2;Casq2;Cd36;Cdk5;Creb3;Csk;Emd;Faf1;Fkbp1b;Fzd1;Gas6;Gsto1;Hdac3;Hnf4a;Hrc;Mdfic;Gbp4;Fam89b;Nf1;Nfkbia;Nov;Ntsr1;Prkce;Pkd1;Pkd2;Pkia;Lypla1;Ppm1a;Ppm1b;Ppp2ca;Rab23;Rangap1;Sar1a;Snai2;Tacc3;Tgfb1;Tgfb2;Thra;Trip6;Txn1;Apc2;Mapk7;Sufu;Slc9a3r1;Tnfsf14;Psmd10;Sfrp5;Ccdc22;Snx12;Ube2j1;Chp1;Gsk3b;Mtor;Litaf;Park7…	9	Nfkbib;Pkig;Sox4;Ube2g2;Keap1;Snx3;Ubac2;Mrln;Nol3
GO:0030662	blue	coated vesicle membrane	CC	0.113636	44	2.3326	Clta;Cope;Nrgn;Necap2;Ap2s1;Ap1s1;Copa;Dab2;Epn2;Eps15;Furin;Sec23a;Snap91;Trf;Vamp3;Sec23b;Golga5;Copb2;Copg2;Copg1;Uso1;Copz2;Copz1;Tmed3;Cltc;Necap1;1190002N15Rik;Sec31a;Copb1;Tbc1d5;Sgip1;Cltb;Sec24a;Scyl1;Cemip;Sec24b;Ldlrap1;Arcn1;Aftph;Synrg;Dennd1a;Picalm;Rassf9;Sec31b	5	Clta;Cope;Nrgn;Necap2;Ap2s1
GO:00320911	blue	negative regulation of protein binding	BP	0.0972222	72	2.29571	Bax;Cdkn2a;Dvl1;Aes;Stub1;Ralb;Ccm2l;Ace;Adam15;Adnp;Adrb2;B2m;Anxa2;Cav1;Ckmt1;Dab2;Hfe;Hnrnpk;Id1;Ifit2;Il10;Isl1;Itga4;Itgb1bp1;Lef1;Lrpap1;Myc;Pdgfb;Pim2;Ppara;Psen2;Ptprf;Rock1;Ruvbl2;Slpi;Sorl1;Aurkb;Aurka;Tdg;Plscr1;Zfpm1;Pin1;Mapk3;Mapk8;Csnk1e;Camk1;Tfip11;Pex14;Gsk3b;Park7;Carm1;Dact1;Lrrk2;Ppp1r2;Ctnnbip1;Mitd1;Gtpbp4;Spag9;Crtac1;Nfatc4;Senp2;Tex14;Golga2;Kdm1a;Tmbim6;Usp33;Wfikkn1;Ar…	7	Bax;Cdkn2a;Dvl1;Aes;Stub1;Ralb;Ccm2l
GO:0030532	blue	small nuclear ribonucleoprotein complex	CC	0.103448	58	2.29463	Snrnp70;Txnl4a;Lsm4;Sf3b5;Snrpf;Snrpd2;Sf3a2;Sart1;Snrpc;Snrpb;Snrpb2;Snrpd1;Snrpe;Snrpn;Lsm2;Ccdc97;Snrpa;Ddx39b;Sart3;Prpf40b;Prpf40a;Sf3b6;Lsm7;Ppih;Lsm5;Zmat2;Snrnp40;Luc7l;Prpf18;Snrpd3;Sf3a1;Lsm3;Luc7l3;Snrpg;Phf5a;Prpf6;Snrpa1;Prpf31;Prpf4;Cd2bp2;Prpf3;Nolc1;Lsm11;Htatsf1;Ddx23;Lsm8;Lsm6;Sf3b1;Lsm10;Prpf8;Luc7l2;Slu7;Rbmx2;Arfgef1;Txnl4b;Sf3b2;Snrnp200;Prpf39	6	Snrnp70;Txnl4a;Lsm4;Sf3b5;Snrpf;Snrpd2
GO:2000134	blue	negative regulation of G1/S transition of mitotic cell cycle	BP	0.111111	45	2.2751	Cdkn2b;Cradd;Ppp2r3d;Sox4;Rbm38;Bcat1;Bcl2;Casp2;Ccnd1;Cdkn1a;Plk3;Ptprv;Ezh2;Fhl1;Gsg2;Prmt2;Mdm2;Pkd2;Pml;Prkdc;Pten;Rb1;Rpa2;Slfn1;Trp53;Brd7;Ctdsp2;E2f7;Pidd1;Dact1;Rps27l;Nacc2;Ctdspl;Fbxo7;Zfp655;Fbxo31;Dgkz;Cdc73;Ctdsp1;Gigyf2;Rfwd3;Kank2;Zc3h12d;Btn2a2;Jade1	5	Cdkn2b;Cradd;Ppp2r3d;Sox4;Rbm38
GO:0008637	blue	apoptotic mitochondrial changes	BP	0.0873786	103	2.2525	Bad;Bax;Cdkn2a;Fxn;Gpx1;Jtb;Prelid1;Nol3;Parl;Akt1;Slc25a4;Slc25a5;Atf2;Atp2a1;Atp7a;Atpif1;Bak1;Bcl2;Bcl2a1a;Bcl2a1b;Bcl2a1d;Bcl2l1;Bid;Bik;Bcl2l11;Bnip3;Bnip3l;Camk2a;Cck;Cd24a;Cideb;Erbb4;Eya2;Fas;Gclc;Gclm;Hgf;Hk2;Hspd1;Ier3;Igf1;Jun;Lmna;Mcl1;Mmp9;Nptx1;Pim2;Plaur;Pnp;Ppp2cb;Rnf7;Sod2;Tnfsf10;Trp53;Zfp13;Map3k1;Mapk9;Aifm1;Siva1;Park2;Acaa2;Pla2g6;Psmd10;Sh3glb1;Sfn;Higd1a;Pdcd5;Mtch2;Gsk3b;…	9	Bad;Bax;Cdkn2a;Fxn;Gpx1;Jtb;Prelid1;Nol3;Parl
GO:0015020	blue	glucuronosyltransferase activity	MF	0.0945946	74	2.21543	B3gat3;Chpf;Galnt2;Pomgnt2;B4galt7;Ugt1a5;Ugt1a8;Ext1;Ext2;Fut4;Fut7;B4galt1;Large;Ugt1a2;Ugt8a;B3galt1;B3galt2;B4galt2;Pigb;B4galt5;B4galt4;B4galt3;Pigm;Pomgnt1;Galnt14;Ugt2a3;Fut11;Glt8d2;Glt8d1;B3gat1;Galnt15;Chsy3;B3galt5;Ugt1a6a;B3gnt9;B3galnt2;Ugt2b34;Ugt3a1;Galnt7;Galnt16;B4gat1;Fut10;Galnt10;B3gntl1;Wbscr17;Poglut1;B3gnt7;Gyltl1b;Galnt12;Pigv;Ugt2b36;Galnt9;B3gnt4;B3gnt8;Dpy19l3;Galnt18;C…	7	B3gat3;Chpf;Galnt2;Pomgnt2;B4galt7;Ugt1a5;Ugt1a8
GO:0045637	blue	regulation of myeloid cell differentiation	BP	0.0769231	169	2.21502	Esrra;Tob2;Hist1h4h;Fstl3;Hist1h4c;Hist1h4d;Hist1h4f;Hist1h4i;Hist1h4j;Hist1h4k;Hist1h4n;Hist1h4a;Hist1h4b;Acvr1b;Acvr2a;Adam8;Apc;C1qc;Car2;Casp8;Ctnnb1;Runx1;Cdk6;Cebpb;Ccr1;Creb1;Csf1;Csf1r;Csf3;Csf3r;Dll1;Fadd;Fas;Fes;Fgfr3;Fos;Gabpa;Gata1;Gata2;Gnas;Hcls1;Hif1a;Hmgb1;Hmgb3;Hoxa5;Hoxa7;Prmt1;Id2;Il12b;Il4;Il5;Inhba;Inpp5d;Itgb3;Jag1;Jun;Mafb;Ldb1;Lef1;Lif;Lmo2;Zbtb7a;Lyn;Mef2c;Meis1;Kitl;Mitf…	13	Esrra;Tob2;Hist1h4h;Fstl3;Hist1h4c;Hist1h4d;Hist1h4f;Hist1h4i;Hist1h4j;Hist1h4k;Hist1h4n;Hist1h4a;Hist1h4b
GO:0072655	blue	establishment of protein localization to mitochondrion	BP	0.0808824	136	2.21447	Bax;Tspo;Cdkn2a;Pemt;Timm17b;Timm23;Psmd8;Ndufa13;Tomm5;Nol3;Parl;Aip;Akt1;Atpif1;Bid;Bnip3l;Csnk2a2;Ctsk;Fzd5;Kat2a;Gdap1;Hes1;Hk1;Hk2;Hspa1l;Hsph1;Hsp90aa1;Hspa4;Il9r;Itgax;Mtx1;Npepps;Psmb7;Ptpn5;Rac2;Rpl28;Srebf1;Srebf2;Timm17a;Timm44;U2af2;Ube2l3;Ugcg;Ywhaz;Zbtb17;Arih2;Zdhhc8;Ept1;Timm9;Timm8a1;Timm10;Fbxw7;Atg13;Dnlz;Tomm40;Cdkl2;Sh3glb1;Plagl2;Timm22;Pdcd5;Actl6a;Sae1;Ruvbl1;Wdr46;Pmaip1;…	11	Bax;Tspo;Cdkn2a;Pemt;Timm17b;Timm23;Psmd8;Ndufa13;Tomm5;Nol3;Parl
GO:0051259	blue	protein oligomerization	BP	0.0630435	460	2.19305	Bax;Cldn3;Nup62;Dhrs4;Keap1;Dctpp1;Oxa1l;Hist1h4h;Tysnd1;Pcbd2;Nol3;Hist1h3g;Hscb;Lnx2;Mief2;Apoa1bp;Hist1h3e;Hist1h3h;Hist1h3i;Hist2h3b;Hist1h4c;Hist1h4d;Hist1h4f;Hist1h4i;Hist1h4j;Hist1h4k;Hist1h4n;Hist1h4a;Hist1h4b;Acadl;Acadm;Acads;Ache;Chrna4;Chrnb2;Actn2;Acvrl1;Adsl;Angpt1;Agrn;Akap2;Aldh1a1;Aldoc;Alox5ap;Mat1a;Anxa5;Anxa6;Apaf1;Birc3;Birc2;App;Aqp4;Ar;Arg1;Axin1;Bcl10;Bid;Bik;Bcl2l11;Blm;A…	29	Bax;Cldn3;Nup62;Dhrs4;Keap1;Dctpp1;Oxa1l;Hist1h4h;Tysnd1;Pcbd2;Nol3;Hist1h3g;Hscb;Lnx2;Mief2;Apoa1bp;Hist1h3e;Hist1h3h;Hist1h3i;Hist2h3b;Hist1h4c;Hist1h4d;Hist1h4f;Hist1h4i;Hist1h4j;Hist1h4k;Hist1h4n;Hist1h4a;Hist1h4b
GO:1902807	blue	negative regulation of cell cycle G1/S phase transition	BP	0.106383	47	2.16463	Cdkn2b;Cradd;Ppp2r3d;Sox4;Rbm38;Bcat1;Bcl2;Casp2;Ccnd1;Cdkn1a;Plk3;Ptprv;Ezh2;Fhl1;Gsg2;Prmt2;Mdm2;Men1;Pkd2;Pml;Prkdc;Pten;Rb1;Rpa2;Slfn1;Trp53;Brd7;Ctdsp2;E2f7;Pidd1;Dact1;Rps27l;Nacc2;Ctdspl;Fbxo7;Susd2;Zfp655;Fbxo31;Dgkz;Cdc73;Ctdsp1;Gigyf2;Rfwd3;Kank2;Zc3h12d;Btn2a2;Jade1	5	Cdkn2b;Cradd;Ppp2r3d;Sox4;Rbm38
GO:0009142	blue	nucleoside triphosphate biosynthetic process	BP	0.0952381	63	2.0688	Atp5l;Atp5e;Nme3;Chchd10;Uqcc3;Atp5g3;Adk;Ak1;Ak4;Aldoa;Atp5a1;Atp5b;Atp5c1;Atp5f1;Atp5g1;Atp5j;Atp5k;Atp6v0a1;Entpd1;Gbas;ATP6;ATP8;Myc;Nme1;Nme2;Pkm;Pklr;Pnp;Ppargc1a;Stat3;Surf1;Tgfb1;Atp6v0a2;Dtymk;Cmpk2;Tcirg1;Atp5o;Slc25a13;Park2;Ctps;Ldhd;Nme6;Ak3;Suclg1;Nme4;Atp5j2;Atp5d;Cmpk1;Stoml2;Atp5s;Ak8;Cad;Atp5h;Nme5;Ak7;Pid1;Atp6v0a4;Nme7;Flcn;Ak5;Tbpl1;Vcp;Ak9	6	Atp5l;Atp5e;Nme3;Chchd10;Uqcc3;Atp5g3
GO:0070585	blue	protein localization to mitochondrion	BP	0.0774648	142	2.06083	Bax;Tspo;Cdkn2a;Pemt;Timm17b;Timm23;Psmd8;Ndufa13;Tomm5;Nol3;Parl;Aip;Akt1;Atpif1;Bag1;Bid;Bnip3l;Csnk2a2;Ctsk;Fzd5;Kat2a;Gdap1;Hes1;Hk1;Hk2;Hspa1l;Dnaja1;Hsph1;Hsp90aa1;Hspa4;Il9r;Itgax;Mtx1;Npepps;Psmb7;Ptpn5;Rac2;Rpl28;Srebf1;Srebf2;Timm17a;Timm44;U2af2;Ube2l3;Ugcg;Ywhaz;Zbtb17;Arih2;Zdhhc8;Ept1;Timm9;Timm8a1;Timm10;Fbxw7;Park2;Atg13;Dnlz;Tomm40;Cdkl2;Sh3glb1;Plagl2;Timm22;Pdcd5;Mtch2;Actl6a;S…	11	Bax;Tspo;Cdkn2a;Pemt;Timm17b;Timm23;Psmd8;Ndufa13;Tomm5;Nol3;Parl
GO:0016236	blue	macroautophagy	BP	0.0664452	301	2.06018	Tspo;Cdc37;Cox8a;Bloc1s1;Lsm4;Ralb;Ndufb9;Map1lc3a;Snrpf;Atg16l2;Rab1b;Hist1h3g;Eva1b;Tmem39b;Hist1h3e;Hist1h3h;Hist1h3i;Hist2h3b;Parl;Fancf;Adrb2;Anxa5;Atg5;Atp1b1;Atp6v0a1;Atpif1;Bnip3;Bnip3l;Calca;Car7;Rb1cc1;Cln3;Ackr3;Hapln1;Csnk2a2;Ctsd;Ctsk;Cttn;Dcn;Eif2s1;Stom;Epm2a;Fancc;Fgf14;Fgf7;Fzd5;Slc37a4;Gba;Kat2a;Gdf5;Hist2h3c1;Hc;Hdac6;Hif1a;Hk2;Hmox1;Kcnk3;Kcnq1;Kdr;Krt15;Cd93;Mdh1;Mstn;Map1a;M…	20	Tspo;Cdc37;Cox8a;Bloc1s1;Lsm4;Ralb;Ndufb9;Map1lc3a;Snrpf;Atg16l2;Rab1b;Hist1h3g;Eva1b;Tmem39b;Hist1h3e;Hist1h3h;Hist1h3i;Hist2h3b;Parl;Fancf
GO:1903008	blue	organelle disassembly	BP	0.0721649	194	2.04516	Tspo;Cdc37;Cdkn2a;Cox8a;Bloc1s1;Capn10;Lsm4;Ndufb9;Map1lc3a;Snrpf;Eva1b;Tmem39b;Parl;Fancf;Adrb2;Anxa5;Atg5;Atp1b1;Atpif1;Bnip3l;Calca;Car7;Cdk1;Plk3;Hapln1;Csnk2a2;Ctsk;Cttn;Eif2s1;Stom;Fancc;Fzd5;Slc37a4;Kat2a;Gdf5;Hc;Hdac6;Hif1a;Hk2;Kcnk3;Kif5b;Kif9;Klc1;Krt15;Eif2d;Cd93;Mdh1;Mstn;Map1a;Myh11;Myom1;Nme2;Nthl1;Sqstm1;Pik3ca;Ppy;Prkg1;Rpl28;Sfrp4;Slc1a3;Snrpb;Snrpd1;Srebf1;Srebf2;Stat2;Nr2c2;Trp…	14	Tspo;Cdc37;Cdkn2a;Cox8a;Bloc1s1;Capn10;Lsm4;Ndufb9;Map1lc3a;Snrpf;Eva1b;Tmem39b;Parl;Fancf
GO:0010821	blue	regulation of mitochondrion organization	BP	0.0734463	177	2.0373	Bad;Bax;Tspo;Cdkn2a;Fxn;Gpx1;Pemt;Psmd8;Prelid1;Uqcc2;Nol3;Mief2;Parl;Adrb2;Akt1;Slc25a5;Atg5;Atpif1;Bak1;Bcl2l1;Bid;Bik;Bcl2l11;Bnip3;Bnip3l;C1qbp;Cideb;Csnk2a2;Ctsk;Cttn;Dcn;Fas;Fzd5;Kat2a;Hes1;Hgf;Hif1a;Hspa1l;Ier3;Igf1;Il9r;Itgax;Kdr;Lig3;Lmna;Mmp9;Plaur;Ppargc1a;Npepps;Psmb7;Ptpn5;Rac2;Rpl28;Srebf1;Srebf2;Tnfsf10;Trp53;U2af2;Ube2l3;Ugcg;Vdac1;Zbtb17;Zfp13;Arih2;Vat1;Zdhhc8;Ept1;Siva1;Fbxw7;P…	13	Bad;Bax;Tspo;Cdkn2a;Fxn;Gpx1;Pemt;Psmd8;Prelid1;Uqcc2;Nol3;Mief2;Parl
GO:0031301	blue	integral component of organelle membrane	CC	0.0704225	213	2.01755	Fkbp8;Gpaa1;Pex16;Syp;Timm17b;Timm23;Chchd6;Unc50;Emc4;Smdt1;Oxa1l;Emc10;Emc9;Tecr;Uqcc3;Abcd1;Aup1;Bak1;Bid;Bnip3;Calr;Cln3;Cpt1a;Creb3;Atf6b;Cux1;Dhcr7;Dmpk;Dpm2;Ext1;G6pc2;Slc37a4;B4galnt1;Gdap1;Bscl2;Pdia3;Hspa5;H13;Itm2b;Lfng;Lrmp;Mfng;Sypl2;Emc8;P2rx1;P2rx4;P2rx7;P2rx6;Pcsk7;Pex11a;Pex11b;Pkd2;Sypl;Ppox;Pex2;Rce1;Rdh16;Rfng;Scd1;St6gal1;St3gal3;St3gal1;St3gal4;St3gal2;St6galnac2;St8sia1;St8…	15	Fkbp8;Gpaa1;Pex16;Syp;Timm17b;Timm23;Chchd6;Unc50;Emc4;Smdt1;Oxa1l;Emc10;Emc9;Tecr;Uqcc3
GO:0006400	blue	tRNA modification	BP	0.1	50	2.00919	Osgep;Urm1;Mocs3;Gtpbp3;Ctu1;Trdmt1;Mettl1;Nsun2;Trmt10c;Ftsj1;Pus1;Wdr4;Qtrt1;Thg1l;Uba5;Adat2;Trmt6;Ctu2;Trit1;Cdk5rap1;Pus3;Alkbh8;Trmt112;Mto1;Tyw5;Cdkal1;Mtfmt;Rpusd4;Trmu;Osgepl1;Trub1;Nsun4;Trmt11;Elp3;Trmo;Trmt5;Trmt44;Rpusd3;Qtrtd1;Rpusd1;Trmt10a;Trmt1;Gm17296;Aars2;Trmt13;Yrdc;Aars;Rpusd2;Trmt61a;Lcmt2	5	Osgep;Urm1;Mocs3;Gtpbp3;Ctu1
GO:0019829	blue	cation-transporting ATPase activity	MF	0.1	50	2.00919	Atp6v0e;Atp5l;Atp6v1f;Atp5e;Atp6v0b;Anxa5;Atp1a1;Atp1b1;Atp1b2;Atp1b3;Atp2a1;Atp2a2;Atp2b2;Atp4a;Atp5a1;Atp5b;Atp5c1;Atp5f1;Atp6v1a;Atp6v0d1;Atp6v1e1;Atp6v0a1;Atp7a;Atp7b;Atp6v0c;Cpox;Atp6v0a2;Tcirg1;Atp1a4;Atp5o;Atp2a3;Atp6ap1;Atp5d;Atp6v1g2;Atp6v1g1;Atp6v1c1;Atp2b1;Atp6v1c2;Atp2c2;Atp13a2;Atp6v0e2;Atp1a2;Atp6v1h;Atp6v0a4;Atp13a1;Atp13a3;Atp1a3;Atp2c1;Atp2b3;Atp2b4	5	Atp6v0e;Atp5l;Atp6v1f;Atp5e;Atp6v0b
GO:0009083	brown	branched-chain amino acid catabolic process	BP	0.454545	11	5.53675	Bckdha;Bckdhb;Bckdk;Acad8;Aldh6a1;Auh;Bcat1;Bcat2;Ivd;Hibadh;Hibch	5	Bckdha;Bckdhb;Bckdk;Acad8;Aldh6a1
GO:0044282	brown	small molecule catabolic process	BP	0.143498	223	5.33105	Adh7;Bckdha;Bckdhb;Bckdk;Glb1;Hagh;Gstz1;Phyh;Pex7;Pfkm;Inpp5k;Sord;Aadat;Eci2;Aass;Pnkd;Hacl1;Smpdl3a;Etfdh;Acad8;Pnpla8;Ddo;Crot;Acad11;Aldh6a1;Mpi;Etfb;Thnsl2;Csad;Pon3;Gcdh;Mettl20;Acadl;Acadm;Acadvl;Acads;Acox1;Actn3;Adh1;Adh5;Akt1;Akt2;Abcd1;Apoe;Arg1;Arg2;Auh;Bad;Bcat1;Bcat2;Cdo1;Cel;Cnr1;Cpt1a;Crabp1;Cyp1a1;Cyp26a1;Cyp27b1;Cyp46a1;Dao;Dbi;Eci1;Esd;Faah;Fah;Akr1b8;Lpin1;Gad2;Galt;Galk1;Gls…	32	Adh7;Bckdha;Bckdhb;Bckdk;Glb1;Hagh;Gstz1;Phyh;Pex7;Pfkm;Inpp5k;Sord;Aadat;Eci2;Aass;Pnkd;Hacl1;Smpdl3a;Etfdh;Acad8;Pnpla8;Ddo;Crot;Acad11;Aldh6a1;Mpi;Etfb;Thnsl2;Csad;Pon3;Gcdh;Mettl20
GO:0004364	brown	glutathione transferase activity	MF	0.296296	27	5.20151	Gdap1;Gstm4;Gstm5;Gstz1;Mgst1;Mgst3;Gsto2;Gstk1;Gsta3;Gsta4;Gstm1;Gstm2;Gstm3;Gstm6;Gstp2;Gstp1;Gstt1;Gstt2;Gsto1;Ltc4s;Hpgds;Eef1e1;Eef1g;Gstm7;Gstt3;Mgst2;Gdap1l1	8	Gdap1;Gstm4;Gstm5;Gstz1;Mgst1;Mgst3;Gsto2;Gstk1
GO:0005777	brown	peroxisome	CC	0.164179	134	5.13711	Cav1;Rida;Phyh;Pex7;Scp2;Eci2;Ech1;Mgst1;Hacl1;Pex5l;Marc2;Pnpla8;Pex11g;Ddo;Crot;Acbd5;Mff;Gstk1;Acad11;Pecr;Paox;Pik3c3;Acox1;Abcd1;Aldh3a2;Arf1;Baat;Cat;Crat;Dao;Ephx2;Acsl1;Gnpat;Hao1;Hmgcl;Hmgcr;Hsd17b4;Hspd1;Ide;Idh1;Amacr;Mpv17;Mvk;Myo5a;Nos2;Prdx1;Pex11a;Pex11b;Pex16;Pomc;Pipox;Pex19;Abcd3;Pxmp2;Pex2;Pex5;Slc25a17;Sod1;Tkt;Uox;Vim;Xdh;Impdh2;Decr2;Map2k2;Slc27a2;Abcd2;Hrasls;Dhrs4;Acsl4;P…	22	Cav1;Rida;Phyh;Pex7;Scp2;Eci2;Ech1;Mgst1;Hacl1;Pex5l;Marc2;Pnpla8;Pex11g;Ddo;Crot;Acbd5;Mff;Gstk1;Acad11;Pecr;Paox;Pik3c3
GO:0042579	brown	microbody	CC	0.164179	134	5.13711	Cav1;Rida;Phyh;Pex7;Scp2;Eci2;Ech1;Mgst1;Hacl1;Pex5l;Marc2;Pnpla8;Pex11g;Ddo;Crot;Acbd5;Mff;Gstk1;Acad11;Pecr;Paox;Pik3c3;Acox1;Abcd1;Aldh3a2;Arf1;Baat;Cat;Crat;Dao;Ephx2;Acsl1;Gnpat;Hao1;Hmgcl;Hmgcr;Hsd17b4;Hspd1;Ide;Idh1;Amacr;Mpv17;Mvk;Myo5a;Nos2;Prdx1;Pex11a;Pex11b;Pex16;Pomc;Pipox;Pex19;Abcd3;Pxmp2;Pex2;Pex5;Slc25a17;Sod1;Tkt;Uox;Vim;Xdh;Impdh2;Decr2;Map2k2;Slc27a2;Abcd2;Hrasls;Dhrs4;Acsl4;P…	22	Cav1;Rida;Phyh;Pex7;Scp2;Eci2;Ech1;Mgst1;Hacl1;Pex5l;Marc2;Pnpla8;Pex11g;Ddo;Crot;Acbd5;Mff;Gstk1;Acad11;Pecr;Paox;Pik3c3
GO:0000407	brown	pre-autophagosomal structure	CC	0.285714	28	5.06033	Rb1cc1;Nbr1;Atg13;Wdr45;Atg9b;Zfyve1;Pik3c3;Atg14;Atg5;Sqstm1;Rab7;Ulk1;Ulk2;Wipi1;Becn1;Wdr45b;Atg12;Atg101;Atg7;Wipi2;Vmp1;Trappc8;Rab1b;Atg2b;Stx12;D17Wsu92e;Atg9a;Atg2a	8	Rb1cc1;Nbr1;Atg13;Wdr45;Atg9b;Zfyve1;Pik3c3;Atg14
GO:0006749	brown	glutathione metabolic process	BP	0.229167	48	4.97182	Gdap1;Hagh;Gstm4;Gstm5;Gstz1;Ggt5;Hmgn5;Mgst1;Gsto2;Gstk1;Ctns;Eif2ak3;G6pdx;Ggt1;Gclc;Gclm;Gpx1;Gpx3;Gsr;Gss;Gstm1;Gstm2;Gstp2;Gstp1;Gstt1;Gstt2;Gsto1;Idh1;Nfe2l2;Sod1;Sod2;Ethe1;Eef1e1;Eef1g;Gstm7;Nat8;Ggt6;Oplah;Gstt3;Cth;Glo1;Ggct;Ggt7;Mgst2;Aldh5a1;Gdap1l1;Txnrd3;Gpx4	11	Gdap1;Hagh;Gstm4;Gstm5;Gstz1;Ggt5;Hmgn5;Mgst1;Gsto2;Gstk1;Ctns
GO:0033539	brown	fatty acid beta-oxidation using acyl-CoA dehydrogenase	BP	0.333333	18	4.91015	Etfdh;Acad8;Acad11;Etfb;Gcdh;Mettl20;Acadl;Acadm;Acadvl;Acads;Acox1;Ivd;Acadsb;Acad10;Acoxl;Acox3;Etfa;Acad9	6	Etfdh;Acad8;Acad11;Etfb;Gcdh;Mettl20
GO:0000045	brown	autophagosome assembly	BP	0.194444	72	4.84605	Rb1cc1;Ctsd;Atg13;Rnf5;Wdr45;Gabarapl1;Trp53inp1;Map1lc3b;Pink1;Atg9b;Fez2;Pik3c3;Atg4a;Atg14;Atg5;Mtm1;Pikfyve;Pip4k2a;Psen1;Rab1a;Rab20;Rab23;Rab33a;Rab33b;Rab7;Ift88;Ulk1;Wipi1;Ubqln2;Sh3glb1;Ift20;Ubqln1;Becn1;Gabarap;Ralb;Emc6;Atg4b;Lrrk2;Map1lc3a;Wdr45b;Atg12;Atg3;Atg101;Trp53inp2;Atg16l2;Atg7;Mtmr3;Wipi2;Chmp4b;Trappc8;Rab1b;Atg2b;Scfd1;Atg16l1;Phf23;Gabarapl2;Rab3gap2;Stx12;Tbc1d14;Pip4k2…	14	Rb1cc1;Ctsd;Atg13;Rnf5;Wdr45;Gabarapl1;Trp53inp1;Map1lc3b;Pink1;Atg9b;Fez2;Pik3c3;Atg4a;Atg14
GO:0004602	brown	glutathione peroxidase activity	MF	0.333333	15	4.48194	Gstz1;Mgst1;Mgst3;Gpx8;Gstk1;Prdx6;Gpx1;Gpx2;Gpx3;Gstt1;Gstt2;Ltc4s;Gpx7;Mgst2;Gpx4	5	Gstz1;Mgst1;Mgst3;Gpx8;Gstk1
GO:0009081	brown	branched-chain amino acid metabolic process	BP	0.333333	15	4.48194	Bckdha;Bckdhb;Bckdk;Acad8;Aldh6a1;Auh;Bcat1;Bcat2;Dao;Ghr;Stat5a;Stat5b;Ivd;Hibadh;Hibch	5	Bckdha;Bckdhb;Bckdk;Acad8;Aldh6a1
GO:0051539	brown	4 iron, 4 sulfur cluster binding	MF	0.225	40	4.42609	Nthl1;Prim2;Etfdh;Narfl;Cdkal1;Isca2;Nubpl;Tyw1;Ndufs2;Aco1;Aco2;Ercc2;Ndufv1;Pola1;Pold1;Pole;Rev3l;Nubp1;Nubp2;Mocs1;Nfu1;Rsad2;Ireb2;Iscu;Cdk5rap1;Sdhb;Isca1;Mutyh;Exo5;Ndufs7;Lias;Dpyd;Ndufs8;Ndufs1;Brip1;Rsad1;Rtel1;Ddx11;Dna2;AK157302	9	Nthl1;Prim2;Etfdh;Narfl;Cdkal1;Isca2;Nubpl;Tyw1;Ndufs2
GO:0048037	brown	cofactor binding	MF	0.125	248	4.38628	Adh7;Ddc;Dhfr;Phyh;Nfs1;Scp2;Sord;Tyms;Uros;Aadat;Eci2;Hacl1;Aldh1a3;Sqrdl;Sirt3;Etfdh;Acad8;Marc2;Akr1b10;Ddo;Aifm3;Acbd5;Srd5a1;Tyw1;Acad11;Thnsl1;Ndufs2;Thnsl2;Cbr4;Csad;Gcdh;Acadl;Acadm;Acadvl;Acads;Acox1;Adh1;Parp1;Alas1;Alas2;Alb;Aldh2;Gfer;Aoc3;Aox1;Birc5;C3;Cat;Cbs;Cry2;Crym;Cryz;Ctbp1;Ctbp2;Cybb;Dao;Dbi;Dbil5;Dld;Fasn;Fdxr;Fmo1;Fmo5;G6pdx;Gad1;Gad2;Gapdhs;Gch1;Gpd1;Gclc;Glud1;Got1;Got2;G…	31	Adh7;Ddc;Dhfr;Phyh;Nfs1;Scp2;Sord;Tyms;Uros;Aadat;Eci2;Hacl1;Aldh1a3;Sqrdl;Sirt3;Etfdh;Acad8;Marc2;Akr1b10;Ddo;Aifm3;Acbd5;Srd5a1;Tyw1;Acad11;Thnsl1;Ndufs2;Thnsl2;Cbr4;Csad;Gcdh
GO:0016054	brown	organic acid catabolic process	BP	0.141935	155	4.35302	Bckdha;Bckdhb;Bckdk;Gstz1;Phyh;Pex7;Aadat;Eci2;Aass;Hacl1;Etfdh;Acad8;Ddo;Crot;Acad11;Aldh6a1;Etfb;Thnsl2;Csad;Pon3;Gcdh;Mettl20;Acadl;Acadm;Acadvl;Acads;Acox1;Akt1;Akt2;Abcd1;Arg1;Arg2;Auh;Bcat1;Bcat2;Cdo1;Cnr1;Cpt1a;Crabp1;Cyp26a1;Dao;Dbi;Eci1;Faah;Fah;Lpin1;Gad2;Gls;Glud1;Got1;Got2;Hadh;Hal;Hao1;Hdc;Hgd;Hsd17b4;Ido1;Idua;Irs1;Lipe;Nos1;Nos2;Nos3;Oat;Pah;Prodh;Pipox;Abcd3;Pex2;Pex5;Renbp;Shmt1;…	22	Bckdha;Bckdhb;Bckdk;Gstz1;Phyh;Pex7;Aadat;Eci2;Aass;Hacl1;Etfdh;Acad8;Ddo;Crot;Acad11;Aldh6a1;Etfb;Thnsl2;Csad;Pon3;Gcdh;Mettl20
GO:0046395	brown	carboxylic acid catabolic process	BP	0.141935	155	4.35302	Bckdha;Bckdhb;Bckdk;Gstz1;Phyh;Pex7;Aadat;Eci2;Aass;Hacl1;Etfdh;Acad8;Ddo;Crot;Acad11;Aldh6a1;Etfb;Thnsl2;Csad;Pon3;Gcdh;Mettl20;Acadl;Acadm;Acadvl;Acads;Acox1;Akt1;Akt2;Abcd1;Arg1;Arg2;Auh;Bcat1;Bcat2;Cdo1;Cnr1;Cpt1a;Crabp1;Cyp26a1;Dao;Dbi;Eci1;Faah;Fah;Lpin1;Gad2;Gls;Glud1;Got1;Got2;Hadh;Hal;Hao1;Hdc;Hgd;Hsd17b4;Ido1;Idua;Irs1;Lipe;Nos1;Nos2;Nos3;Oat;Pah;Prodh;Pipox;Abcd3;Pex2;Pex5;Renbp;Shmt1;…	22	Bckdha;Bckdhb;Bckdk;Gstz1;Phyh;Pex7;Aadat;Eci2;Aass;Hacl1;Etfdh;Acad8;Ddo;Crot;Acad11;Aldh6a1;Etfb;Thnsl2;Csad;Pon3;Gcdh;Mettl20
GO:0007031	brown	peroxisome organization	BP	0.228571	35	4.22898	Pex7;Scp2;Pex5l;Zfand6;Pex11g;Acbd5;Sec16b;Pik3c3;Acox1;Abcd1;Pex11a;Pex11b;Pex16;Pex19;Abcd3;Pex2;Pex5;Hrasls;Pex14;Pex3;Fis1;Lonp2;Pex1;Pex13;Tmem135;Dnm1l;Pex26;Pik3r4;Trappc8;Pex12;Acot8;Pex6;Mavs;Rab8b;Pex10	8	Pex7;Scp2;Pex5l;Zfand6;Pex11g;Acbd5;Sec16b;Pik3c3
GO:0016226	brown	iron-sulfur cluster assembly	BP	0.294118	17	4.08817	Nfs1;Ciao1;Narfl;Fam96a;Isca2;Fxn;Nubp1;Nubp2;Nfu1;Iscu;Fam96b;Isca1;Mms19;Hscb;Ciapin1;Iba57;AK157302	5	Nfs1;Ciao1;Narfl;Fam96a;Isca2
GO:0031163	brown	metallo-sulfur cluster assembly	BP	0.294118	17	4.08817	Nfs1;Ciao1;Narfl;Fam96a;Isca2;Fxn;Nubp1;Nubp2;Nfu1;Iscu;Fam96b;Isca1;Mms19;Hscb;Ciapin1;Iba57;AK157302	5	Nfs1;Ciao1;Narfl;Fam96a;Isca2
GO:0005776	brown	autophagosome	CC	0.192308	52	4.05072	Nbr1;Rab24;Rpn2;Gabarapl1;Trp53inp1;Map1lc3b;3110043O21Rik;Atg9b;Zfyve1;Atg14;Atg5;Cln3;Hap1;Htt;Hspa8;Fyco1;Sqstm1;Peg3;Pip4k2a;Rab12;Rab23;Ulk1;Srpx;Wipi1;Vti1a;Sh3glb1;Ubqln1;Becn1;Gabarap;Ralb;Lrrk2;Map1lc3a;Stx17;Trp53inp2;Wash1;Tecpr1;Osbpl7;Wdfy3;Tbc1d5;Atg16l2;Vmp1;Atg16l1;Gabarapl2;Ubqln4;Tbc1d14;Pip4k2b;Orai1;Pip4k2c;Usp33;Tbc1d25;D17Wsu92e;Atg9a	10	Nbr1;Rab24;Rpn2;Gabarapl1;Trp53inp1;Map1lc3b;3110043O21Rik;Atg9b;Zfyve1;Atg14
GO:0070972	brown	protein localization to endoplasmic reticulum	BP	0.210526	38	3.93637	Srpr;Ssr3;Spcs1;Sec62;Sec16b;Kdelr3;Sec63;Os9;Macf1;Bcap29;Folr1;Folr2;Grik5;Hspa5;Ppp1r15a;Pex16;Rab10;Ryr2;Srp14;Srp54a;Srp9;Bcap31;Vapa;Sec61a1;Srp19;Spcs2;Srp72;Kdelr2;Kdelr1;Zfand2b;Ubac2;Chmp4b;Rab3gap2;Gbf1;Ank2;Srp68;Rab3gap1;Ankrd13c	8	Srpr;Ssr3;Spcs1;Sec62;Sec16b;Kdelr3;Sec63;Os9
GO:00515361	brown	iron-sulfur cluster binding	MF	0.177419	62	3.92818	Nfs1;Nthl1;Prim2;Etfdh;Narfl;Cdkal1;Aifm3;Isca2;Nubpl;Tyw1;Ndufs2;Aco1;Aco2;Aox1;Cmah;Ercc2;Fdx1;Fech;Fxn;Ndufv1;Pola1;Pold1;Pole;Rev3l;Xdh;Nubp1;Nubp2;Glrx3;Cisd1;Mocs1;Nfu1;Rsad2;Ireb2;Iscu;Uqcrfs1;Cdk5rap1;Cisd2;Sdhb;Fdx1l;Isca1;Glrx2;Mutyh;Ndufv2;Glrx5;Exo5;Elp3;Ndufs7;Lias;Dpyd;Ciapin1;Aox2;Cisd3;Rfesd;Ndufs8;Ndufs1;Brip1;Rsad1;Abat;Rtel1;Ddx11;Dna2;AK157302	11	Nfs1;Nthl1;Prim2;Etfdh;Narfl;Cdkal1;Aifm3;Isca2;Nubpl;Tyw1;Ndufs2
GO:00515401	brown	metal cluster binding	MF	0.177419	62	3.92818	Nfs1;Nthl1;Prim2;Etfdh;Narfl;Cdkal1;Aifm3;Isca2;Nubpl;Tyw1;Ndufs2;Aco1;Aco2;Aox1;Cmah;Ercc2;Fdx1;Fech;Fxn;Ndufv1;Pola1;Pold1;Pole;Rev3l;Xdh;Nubp1;Nubp2;Glrx3;Cisd1;Mocs1;Nfu1;Rsad2;Ireb2;Iscu;Uqcrfs1;Cdk5rap1;Cisd2;Sdhb;Fdx1l;Isca1;Glrx2;Mutyh;Ndufv2;Glrx5;Exo5;Elp3;Ndufs7;Lias;Dpyd;Ciapin1;Aox2;Cisd3;Rfesd;Ndufs8;Ndufs1;Brip1;Rsad1;Abat;Rtel1;Ddx11;Dna2;AK157302	11	Nfs1;Nthl1;Prim2;Etfdh;Narfl;Cdkal1;Aifm3;Isca2;Nubpl;Tyw1;Ndufs2
GO:0042537	brown	benzene-containing compound metabolic process	BP	0.277778	18	3.91376	Cyp4b1;Gstm4;Gstm5;Aadat;Pon3;Cyp1b1;Gstm2;Ido1;Txnrd1;Tdo2;Gstm7;Ccbl1;Kynu;Afmid;Kmo;Ido2;Ccbl2;Ugt1a1	5	Cyp4b1;Gstm4;Gstm5;Aadat;Pon3
GO:0045047	brown	protein targeting to ER	BP	0.277778	18	3.91376	Srpr;Ssr3;Spcs1;Sec62;Sec63;Macf1;Folr1;Folr2;Srp14;Srp54a;Srp9;Sec61a1;Srp19;Spcs2;Srp72;Zfand2b;Chmp4b;Srp68	5	Srpr;Ssr3;Spcs1;Sec62;Sec63
GO:0070861	brown	regulation of protein exit from endoplasmic reticulum	BP	0.277778	18	3.91376	Erlec1;Derl3;Svip;Sec16b;Os9;Sorl1;Ube2g2;Bcap31;Ube2j1;Ubac2;Tmem30a;Gcc2;Slc35d3;Edem2;Derl2;Edem1;Yod1;Tmem30b	5	Erlec1;Derl3;Svip;Sec16b;Os9
GO:0016835	brown	carbon-oxygen lyase activity	MF	0.160494	81	3.84729	Car4;Pcbd1;Nthl1;Ogg1;Pts;Uros;Car5b;Apip;Sirt3;Wdyhv1;Gmds;Thnsl2;Neil2;Aco1;Aco2;Apex1;Auh;Car8;Car2;Car5a;Car7;Cbs;Eno1;Eno2;Eno3;Fasn;Fh1;Xrcc6;Hmbs;Hmga1;Hmga2;Hsd17b4;Alad;Ntan1;Xrcc5;Car14;Rps3;Tor3a;Hacd1;Sirt6;Park7;Hacd3;Sirt2;Acer3;Uba5;Hacd4;Naaa;L3hypdh;Sirt5;Ydjc;Carkd;Hacd2;Smug1;Etnppl;Car13;Aplf;Pcbd2;Neil1;Macrod2;Ehhadh;Sirt4;Tgds;Car12;Apex2;Polq;Car15;Echs1;Sirt1;Hadha;Oard1;…	13	Car4;Pcbd1;Nthl1;Ogg1;Pts;Uros;Car5b;Apip;Sirt3;Wdyhv1;Gmds;Thnsl2;Neil2
GO:0019395	brown	fatty acid oxidation	BP	0.160494	81	3.84729	Adh7;Phyh;Pex7;Eci2;Nucb2;Hacl1;Etfdh;Acad8;Crot;Acad11;Etfb;Gcdh;Mettl20;Acadl;Acadm;Acadvl;Acads;Acox1;Akt1;Akt2;Abcd1;Alox12;Cd36;Cnr1;Cpt1a;Dbi;Eci1;Dgat1;Fabp3;Hadh;Hao1;Hsd17b4;Irs1;Nr4a3;Por;Ppara;Ppard;Pparg;Ppargc1a;Abcd3;Pex2;Pex5;Slc25a17;Twist1;Mapk14;Slc27a2;Abcd2;Pdk4;Acaa2;Ivd;Mlycd;Mtor;Acadsb;Lonp2;Plin5;Decr1;Dgat2;Adipor2;Eci3;C1qtnf2;Bdh2;Tysnd1;Acad10;Pex13;Adipor1;Acoxl;Ehha…	13	Adh7;Phyh;Pex7;Eci2;Nucb2;Hacl1;Etfdh;Acad8;Crot;Acad11;Etfb;Gcdh;Mettl20
GO:0034440	brown	lipid oxidation	BP	0.156627	83	3.7455	Adh7;Phyh;Pex7;Eci2;Nucb2;Hacl1;Etfdh;Acad8;Crot;Acad11;Etfb;Gcdh;Mettl20;Acadl;Acadm;Acadvl;Acads;Acox1;Akt1;Akt2;Abcd1;Alox12;Apod;Cd36;Cnr1;Cpt1a;Dbi;Eci1;Dgat1;Fabp3;Hadh;Hao1;Hsd17b4;Irs1;Nr4a3;Por;Ppara;Ppard;Pparg;Ppargc1a;Abcd3;Pex2;Pex5;Slc25a17;Twist1;Mapk14;Slc27a2;Abcd2;Pla2g7;Pdk4;Acaa2;Ivd;Mlycd;Mtor;Acadsb;Lonp2;Plin5;Decr1;Dgat2;Adipor2;Eci3;C1qtnf2;Bdh2;Tysnd1;Acad10;Pex13;Adipor…	13	Adh7;Phyh;Pex7;Eci2;Nucb2;Hacl1;Etfdh;Acad8;Crot;Acad11;Etfb;Gcdh;Mettl20
GO:0016209	brown	antioxidant activity	MF	0.175439	57	3.70262	Ccs;Gstz1;Nxn;Mgst1;Trp53inp1;Mgst3;Gsto2;Gpx8;Gstk1;Sep15;Prdx3;Prdx6;Apoe;Cat;Epx;Gpx1;Gpx2;Gpx3;Gsr;Gstt1;Gstt2;Gsto1;Hba-a1;Hp;Ltc4s;Nqo1;Prdx1;Ptgs1;Ptgs2;Sepw1;Sod1;Sod2;Sod3;Prdx2;Tpo;Txnrd2;Txnrd1;Txndc17;Prdx4;Prdx5;Apom;Park7;Gpx7;Pxdn;Iyd;Fam213a;Ubiad1;Lpo;Srxn1;Vimp;Hba-a2;Cygb;Mgst2;Txndc2;Txnrd3;Kdm3b;Gpx4	10	Ccs;Gstz1;Nxn;Mgst1;Trp53inp1;Mgst3;Gsto2;Gpx8;Gstk1;Sep15
GO:0030667	brown	secretory granule membrane	CC	0.175439	57	3.70262	Car4;Cav1;Cav2;Cpe;Ica1;Snca;Vamp8;Tmed2;Rab5a;Rab26;Adam8;Anxa7;Aqp1;Rab27a;Bsg;Dmbt1;Flot2;Cuzd1;Itpr1;Kcnq1;Lamp2;Cd46;Msn;Slc11a1;Pam;Pcsk4;Pnliprp2;Ptprn2;Selp;Slc2a3;Sparc;Ift88;Vamp1;Vamp2;Clca1;Sytl4;Abca3;Syt9;Spaca1;Eqtn;Sycn;Tmed10;Zg16;Izumo1;Sun1;Tmem190;Rab27b;Pla1a;Scamp1;Trip11;Sri;Actn1;Abcc4;Lamp3;Myrip;Rph3al;Vgf	10	Car4;Cav1;Cav2;Cpe;Ica1;Snca;Vamp8;Tmed2;Rab5a;Rab26
GO:0008198	brown	ferrous iron binding	MF	0.25	20	3.60053	Heph;Snca;Urod;Nt5e;Isca2;Cdo1;Fxn;Plod1;Th;Trf;Fto;Iscu;Isca1;Alkbh3;Dnajc24;Haao;Alkbh1;Tet2;Alkbh2;AK157302	5	Heph;Snca;Urod;Nt5e;Isca2
GO:0031307	brown	integral component of mitochondrial outer membrane	CC	0.25	20	3.60053	Bnip3;Gdap1;Pink1;Armcx3;Fundc1;Bak1;Cpt1a;Dmpk;Synj2bp;Tomm40;Rhot1;Tomm7;Fis1;Fundc2;Mgarp;Tomm20;Mul1;Abcb6;Rhot2;Tomm22	5	Bnip3;Gdap1;Pink1;Armcx3;Fundc1
GO:0009062	brown	fatty acid catabolic process	BP	0.15942	69	3.51188	Phyh;Pex7;Eci2;Hacl1;Etfdh;Acad8;Crot;Acad11;Etfb;Gcdh;Mettl20;Acadl;Acadm;Acadvl;Acads;Acox1;Akt1;Akt2;Abcd1;Cnr1;Cpt1a;Dbi;Eci1;Faah;Lpin1;Hadh;Hao1;Hsd17b4;Irs1;Lipe;Abcd3;Pex2;Pex5;Slc25a17;Twist1;Slc27a2;Slc27a4;Abcd2;Acaa2;Ivd;Mlycd;Mtor;Lpin2;Lpin3;Acadsb;Lonp2;Plin5;Decr1;Eci3;Bdh2;Acot7;Tysnd1;Acad10;Cyp4f18;Pex13;Acoxl;Ehhadh;Acox3;Hadha;Acacb;Ces1d;Etfa;Acaa1a;Acot2;Acad9;Sesn2;Hadhb;I…	11	Phyh;Pex7;Eci2;Hacl1;Etfdh;Acad8;Crot;Acad11;Etfb;Gcdh;Mettl20
GO:0007033	brown	vacuole organization	BP	0.129496	139	3.49811	Rb1cc1;Ctsd;Aktip;Vamp8;Atg13;Rnf5;Wdr45;Gabarapl1;Trp53inp1;Map1lc3b;Snap29;Pink1;Atg9b;Vps41;Fez2;Pik3c3;Atg4a;Atg14;Abca1;Acp2;Adrb2;Atg5;Arf1;Atp6v0c;Coro1a;Tpp1;Cln3;Gaa;Hexa;Hexb;Hspa8;Idua;Lyst;Man2a1;Mt3;Mtm1;Myo7a;P2rx7;Pikfyve;Pip4k2a;Ppt1;Psen1;Rab1a;Rab20;Rab23;Rab33a;Rab33b;Rab7;Rab34;Vps4b;Snapin;Tfeb;Ift88;Tmem165;Ulk1;Cln8;Naglu;Srpx;Wipi1;Ubqln2;Sh3glb1;Ift20;Ubqln1;Becn1;Mbtps1;…	18	Rb1cc1;Ctsd;Aktip;Vamp8;Atg13;Rnf5;Wdr45;Gabarapl1;Trp53inp1;Map1lc3b;Snap29;Pink1;Atg9b;Vps41;Fez2;Pik3c3;Atg4a;Atg14
GO:0031306	brown	intrinsic component of mitochondrial outer membrane	CC	0.238095	21	3.45892	Bnip3;Gdap1;Pink1;Armcx3;Fundc1;Bak1;Cpt1a;Dmpk;Synj2bp;Tomm40;Rhot1;Tomm7;Fis1;Fundc2;Mgarp;Tomm20;Mul1;Abcb6;Mfn2;Rhot2;Tomm22	5	Bnip3;Gdap1;Pink1;Armcx3;Fundc1
GO:0006914	brown	autophagy	BP	0.0985915	426	3.44721	Bnip3;Bnip3l;Rb1cc1;Ctsd;Gba;Myom1;Nbr1;Nme2;Nthl1;Rab24;Snca;Vamp8;Mid2;Atg13;Stbd1;Rnf5;Wdr45;Tmem59;Gabarapl1;Trp53inp1;Atg10;Dram2;Map1lc3b;Snap29;Rbm18;Pink1;Fundc1;3110043O21Rik;Acbd5;Svip;Dapl1;Gabra5;Atg9b;Vps41;Fez2;Pik3c3;Pdk1;Slc17a9;Yipf1;Nrbf2;Atg4a;Atg14;Abl1;Adrb2;Ager;Akt1;Anxa5;Anxa7;Atg5;Arsb;Arsa;Atm;Atp1b1;Atp6v0a1;Atpif1;Bcl2;Tspo;Calca;Car7;Casp1;Cdc37;Cdkn2a;Cln3;Ackr3;Cox8…	42	Bnip3;Bnip3l;Rb1cc1;Ctsd;Gba;Myom1;Nbr1;Nme2;Nthl1;Rab24;Snca;Vamp8;Mid2;Atg13;Stbd1;Rnf5;Wdr45;Tmem59;Gabarapl1;Trp53inp1;Atg10;Dram2;Map1lc3b;Snap29;Rbm18;Pink1;Fundc1;3110043O21Rik;Acbd5;Svip;Dapl1;Gabra5;Atg9b;Vps41;Fez2;Pik3c3;Pdk1;Slc17a9;Yipf1;Nrbf2;Atg4a;Atg14
GO:0009063	brown	cellular amino acid catabolic process	BP	0.15493	71	3.40241	Bckdha;Bckdhb;Bckdk;Gstz1;Aadat;Aass;Acad8;Ddo;Aldh6a1;Thnsl2;Csad;Arg1;Arg2;Auh;Bcat1;Bcat2;Cdo1;Dao;Fah;Gad2;Gls;Glud1;Got1;Got2;Hal;Hdc;Hgd;Ido1;Nos1;Nos2;Nos3;Oat;Pah;Prodh;Pipox;Shmt1;Ddah2;Prodh2;Ivd;Tdo2;Tdh;Hibadh;Dtd1;Asrgl1;Pcyox1;Hoga1;Gcsh;Kynu;Afmid;Tha1;Abhd12;Kmo;Gldc;Aldh1l1;Ido2;Mtrr;Aldh5a1;Aldh1l2;Gls2;Hibch;Ppat;Sds;Tat;Pcyox1l;Uroc1;Agxt2;Abat;Ahcy;Dtd2;Atp2b4;Amt	11	Bckdha;Bckdhb;Bckdk;Gstz1;Aadat;Aass;Acad8;Ddo;Aldh6a1;Thnsl2;Csad
GO:0044438	brown	microbody part	CC	0.16129	62	3.39062	Cav1;Pex7;Scp2;Eci2;Mgst1;Pex5l;Pnpla8;Pex11g;Pecr;Paox;Acox1;Abcd1;Arf1;Cat;Dao;Acsl1;Gnpat;Hmgcr;Hsd17b4;Hspd1;Ide;Prdx1;Pex11a;Pex11b;Pex16;Pomc;Pex19;Abcd3;Pxmp2;Pex2;Pex5;Slc25a17;Impdh2;Decr2;Map2k2;Slc27a2;Abcd2;Dhrs4;Prdx5;Pex14;Slc22a21;Pex3;Mlycd;Pxmp4;Fis1;Ttc1;Lonp2;Far1;Atad1;Pex1;Pex13;Pex26;Acox3;Pex12;Acot8;Mvd;Pex6;Agps;Mavs;Cnot1;Rab8b;Pex10	10	Cav1;Pex7;Scp2;Eci2;Mgst1;Pex5l;Pnpla8;Pex11g;Pecr;Paox
GO:0044439	brown	peroxisomal part	CC	0.16129	62	3.39062	Cav1;Pex7;Scp2;Eci2;Mgst1;Pex5l;Pnpla8;Pex11g;Pecr;Paox;Acox1;Abcd1;Arf1;Cat;Dao;Acsl1;Gnpat;Hmgcr;Hsd17b4;Hspd1;Ide;Prdx1;Pex11a;Pex11b;Pex16;Pomc;Pex19;Abcd3;Pxmp2;Pex2;Pex5;Slc25a17;Impdh2;Decr2;Map2k2;Slc27a2;Abcd2;Dhrs4;Prdx5;Pex14;Slc22a21;Pex3;Mlycd;Pxmp4;Fis1;Ttc1;Lonp2;Far1;Atad1;Pex1;Pex13;Pex26;Acox3;Pex12;Acot8;Mvd;Pex6;Agps;Mavs;Cnot1;Rab8b;Pex10	10	Cav1;Pex7;Scp2;Eci2;Mgst1;Pex5l;Pnpla8;Pex11g;Pecr;Paox
GO:0072329	brown	monocarboxylic acid catabolic process	BP	0.148148	81	3.37672	Phyh;Pex7;Eci2;Hacl1;Etfdh;Acad8;Crot;Acad11;Etfb;Pon3;Gcdh;Mettl20;Acadl;Acadm;Acadvl;Acads;Acox1;Akt1;Akt2;Abcd1;Cnr1;Cpt1a;Crabp1;Cyp26a1;Dbi;Eci1;Faah;Lpin1;Hadh;Hao1;Hsd17b4;Idua;Irs1;Lipe;Abcd3;Pex2;Pex5;Slc25a17;Twist1;Slc27a2;Slc27a4;Abcd2;Acaa2;Cyp39a1;Ivd;Mlycd;Mtor;Akr1a1;Lpin2;Lpin3;Acadsb;Lonp2;Plin5;Hoga1;Decr1;Eci3;Bdh2;Acot7;Tysnd1;Acad10;Cyp4f18;Pex13;Acoxl;Ehhadh;Acox3;Hadha;Aca…	12	Phyh;Pex7;Eci2;Hacl1;Etfdh;Acad8;Crot;Acad11;Etfb;Pon3;Gcdh;Mettl20
GO:0016667	brown	oxidoreductase activity, acting on a sulfur group of donors	MF	0.177778	45	3.35509	Nxn;Msrb1;Sqrdl;Ero1lb;Gsto2;Gstk1;Msrb2;Enox2;Gfer;Coil;Dld;Gsr;Pdia3;Gsto1;Txn1;Txnrd2;Glrx3;Txnrd1;Ero1l;Txndc17;Txnl1;Txn2;Sumf1;Ifi30;Txndc12;Dnajc10;Pcyox1;Tmx3;Glrx2;Chchd4;Tmx1;Glrx5;Sh3bgrl3;Srxn1;Glrx;Ptges2;Qsox1;Msra;Suox;Txndc2;Qsox2;Txnrd3;Pyroxd1;Pcyox1l;Msrb3	8	Nxn;Msrb1;Sqrdl;Ero1lb;Gsto2;Gstk1;Msrb2;Enox2
GO:0016829	brown	lyase activity	MF	0.118644	177	3.33864	Car4;Cd38;Pcbd1;Ddc;Gucy2c;Nthl1;Ogg1;Pts;Urod;Uros;Car5b;Apip;Poll;Hacl1;Sirt3;Wdyhv1;Tyw1;Gmds;Thnsl2;Csad;Neil2;Aco1;Aco2;Adcy6;Adcy7;Adcy8;Adcy9;Adsl;Aldoa;Aldoc;Amd1;Apex1;Auh;Bst1;Car8;Car2;Car5a;Car7;Cbs;Cyp17a1;Ddt;Eno1;Eno2;Eno3;Fasn;Fech;Fh1;Xrcc6;Gad1;Gad2;Glul;Got1;Gucy2e;Hal;Hccs;Hdc;Hmbs;Hmgcl;Hmga1;Hmga2;Hsd17b4;Irg1;Ltc4s;Alad;Me1;Npr1;Ntan1;Odc1;Pam;Pck1;Polb;Sgpl1;Shmt1;Umps;Xrc…	21	Car4;Cd38;Pcbd1;Ddc;Gucy2c;Nthl1;Ogg1;Pts;Urod;Uros;Car5b;Apip;Poll;Hacl1;Sirt3;Wdyhv1;Tyw1;Gmds;Thnsl2;Csad;Neil2
GO:0072599	brown	establishment of protein localization to endoplasmic reticulum	BP	0.227273	22	3.32581	Srpr;Ssr3;Spcs1;Sec62;Sec63;Macf1;Folr1;Folr2;Rab10;Ryr2;Srp14;Srp54a;Srp9;Sec61a1;Srp19;Spcs2;Srp72;Zfand2b;Chmp4b;Rab3gap2;Srp68;Rab3gap1	5	Srpr;Ssr3;Spcs1;Sec62;Sec63
GO:0005770	brown	late endosome	CC	0.126866	134	3.30493	Clcn3;Cxcr4;F2r;Nbr1;Slc31a2;Vamp8;Rnf13;Vamp5;Tmem59;Rab9;Derl1;Chid1;Lamtor5;Tmem192;Ctns;Vps41;Pik3c3;Anxa6;Apoe;Arf1;Rhob;Rab27a;Atp7a;Atp7b;Anxa2;Cd1d1;Cd63;Cln3;Ddit3;Gja1;H2-Eb1;H2-DMa;H2-DMb2;Htt;Lipc;Hspa8;Irgm1;Igf2r;Cd74;Kcnq1;Lamp1;Lamp2;Ldlr;M6pr;Fyco1;Mtm1;Myo5a;Slc11a1;Slc11a2;Ntrk1;Lgmn;Rab7;Sdf4;Pmel;Slc31a1;Src;Trf;Tsg101;Slc30a3;Slc30a4;Bace1;Map2k1;Map2k2;Mapk1;Mapk3;Dysf;Mica…	17	Clcn3;Cxcr4;F2r;Nbr1;Slc31a2;Vamp8;Rnf13;Vamp5;Tmem59;Rab9;Derl1;Chid1;Lamtor5;Tmem192;Ctns;Vps41;Pik3c3
GO:00313011	brown	integral component of organelle membrane	CC	0.112676	213	3.29604	Bnip3;G6pc2;Gdap1;P2rx4;St8sia4;Vamp5;Ndfip1;Asph;Emc3;Etfdh;Tvp23b;Derl1;Saraf;Apool;Pink1;Spcs1;Pex11g;Derl3;Tmem70;Armcx3;Fundc1;Insig2;Elovl4;Pigk;Abcd1;Aup1;Bak1;Bid;Calr;Cln3;Cpt1a;Creb3;Atf6b;Cux1;Dhcr7;Dmpk;Dpm2;Ext1;Fkbp8;Slc37a4;B4galnt1;Bscl2;Gpaa1;Pdia3;Hspa5;H13;Itm2b;Lfng;Lrmp;Mfng;Sypl2;Emc8;P2rx1;P2rx7;P2rx6;Pcsk7;Pex11a;Pex11b;Pex16;Pkd2;Sypl;Ppox;Pex2;Rce1;Rdh16;Rfng;Scd1;St6gal…	24	Bnip3;G6pc2;Gdap1;P2rx4;St8sia4;Vamp5;Ndfip1;Asph;Emc3;Etfdh;Tvp23b;Derl1;Saraf;Apool;Pink1;Spcs1;Pex11g;Derl3;Tmem70;Armcx3;Fundc1;Insig2;Elovl4;Pigk
GO:00325921	brown	integral component of mitochondrial membrane	CC	0.173913	46	3.28136	Bnip3;Gdap1;Etfdh;Apool;Pink1;Tmem70;Armcx3;Fundc1;Bak1;Bid;Cpt1a;Dmpk;Ppox;Timm17a;Timm17b;Synj2bp;Coa3;Tomm40;Timm23;Abcb10;Rhot1;Chchd3;Chchd6;Tomm7;Fis1;Ptpmt1;Ccdc109b;Fundc2;Mgarp;Tomm20;Apoo;Mul1;Smdt1;Oxa1l;Abcb6;Mcur1;Immt;Uqcc3;Slc8b1;Rhot2;Mcu;Micu1;Tmem11;Tomm22;2410015M20Rik;Cox18	8	Bnip3;Gdap1;Etfdh;Apool;Pink1;Tmem70;Armcx3;Fundc1
GO:0006635	brown	fatty acid beta-oxidation	BP	0.163636	55	3.26645	Pex7;Eci2;Etfdh;Acad8;Crot;Acad11;Etfb;Gcdh;Mettl20;Acadl;Acadm;Acadvl;Acads;Acox1;Akt1;Akt2;Abcd1;Cnr1;Cpt1a;Dbi;Eci1;Hadh;Hsd17b4;Irs1;Abcd3;Pex2;Pex5;Slc25a17;Twist1;Slc27a2;Abcd2;Acaa2;Ivd;Mlycd;Mtor;Acadsb;Lonp2;Plin5;Decr1;Eci3;Bdh2;Tysnd1;Acad10;Acoxl;Ehhadh;Acox3;Hadha;Acacb;Etfa;Acaa1a;Acad9;Sesn2;Hadhb;Irs2;Acsl5	9	Pex7;Eci2;Etfdh;Acad8;Crot;Acad11;Etfb;Gcdh;Mettl20
GO:0044242	brown	cellular lipid catabolic process	BP	0.122449	147	3.23563	Gba;Phyh;Pex7;Mgll;Eci2;Hacl1;Smpdl3a;Etfdh;Acad8;Pnpla8;Abhd5;Crot;Gpcpd1;Acad11;Etfb;Apob;Gcdh;Mettl20;Acadl;Acadm;Acadvl;Acads;Acox1;Adrb2;Gla;Akt1;Akt2;Abcd1;Prdx6;Apoa1;Apoa2;Apoc3;Apoe;Apoh;Cel;Cnr1;Cpt1a;Crabp1;Cyp1b1;Cyp26a1;Dbi;Eci1;Drd1;Ptprv;Faah;Akr1b8;Lpin1;Galc;Gm2a;Gpld1;Hadh;Hao1;Hexa;Hexb;Lipc;Hsd17b4;Idh1;Irs1;Ldlr;Lipe;Lpl;Amacr;Mt3;Naga;Neu1;Enpp2;Prkcd;Pla2g1b;Pla2g2c;Pla2g4a…	18	Gba;Phyh;Pex7;Mgll;Eci2;Hacl1;Smpdl3a;Etfdh;Acad8;Pnpla8;Abhd5;Crot;Gpcpd1;Acad11;Etfb;Apob;Gcdh;Mettl20
GO:0016799	brown	hydrolase activity, hydrolyzing N-glycosyl compounds	MF	0.217391	23	3.20029	Art5;Cd38;Nthl1;Ogg1;Neil2;Adprh;Bst1;Man2a1;Mbd4;Pcna;Tdg;Ung;Rps3;Mutyh;Smug1;Neil1;Macrod2;Macrod1;Man2a2;Ccno;Neil3;Mpg;Dnph1	5	Art5;Cd38;Nthl1;Ogg1;Neil2
GO:0005773	brown	vacuole	CC	0.0940171	468	3.19374	Aga;Glb1;Cd34;Cxcr4;Ctsd;Egf;Gba;Mpz;Napb;Nbr1;P2rx4;Rab24;Rpn2;Vamp8;Rnf13;Atp6ap1;Calcrl;Tmem59;Rab9;Dnase2b;Gabarapl1;Trp53inp1;Dram2;Map1lc3b;Mmd;Chid1;Lamtor5;Slc44a2;Fuca1;Prcp;Tmem192;3110043O21Rik;Stard3nl;Ctns;Atg9b;Zfyve1;Vps41;Ccz1;Slc17a5;March3;Pon2;Atraid;Znrf2;Atg14;Abca2;Ace;Acp2;Acp5;Acr;Ada;Adam8;Gla;Akr1b3;Ank3;Ankfy1;Anxa11;Anxa6;Prdx6;Ap3b1;Ap3d1;Atg5;Apoe;Arsb;Arsa;Asah1;Rab…	44	Aga;Glb1;Cd34;Cxcr4;Ctsd;Egf;Gba;Mpz;Napb;Nbr1;P2rx4;Rab24;Rpn2;Vamp8;Rnf13;Atp6ap1;Calcrl;Tmem59;Rab9;Dnase2b;Gabarapl1;Trp53inp1;Dram2;Map1lc3b;Mmd;Chid1;Lamtor5;Slc44a2;Fuca1;Prcp;Tmem192;3110043O21Rik;Stard3nl;Ctns;Atg9b;Zfyve1;Vps41;Ccz1;Slc17a5;March3;Pon2;Atraid;Znrf2;Atg14
GO:00985731	brown	intrinsic component of mitochondrial membrane	CC	0.166667	48	3.13972	Bnip3;Gdap1;Etfdh;Apool;Pink1;Tmem70;Armcx3;Fundc1;Bak1;Bid;Cpt1a;Dmpk;Ppox;Timm17a;Timm17b;Synj2bp;Coa3;Tomm40;Timm23;Abcb10;Rhot1;Chchd3;Chchd6;Tomm7;Fis1;Ptpmt1;Ccdc109b;Fundc2;Mgarp;Tomm20;Apoo;Mul1;Smdt1;Oxa1l;Abcb6;Dusp18;Mcur1;Immt;Uqcc3;Mfn2;Slc8b1;Rhot2;Mcu;Micu1;Tmem11;Tomm22;2410015M20Rik;Cox18	8	Bnip3;Gdap1;Etfdh;Apool;Pink1;Tmem70;Armcx3;Fundc1
GO:1901565	brown	organonitrogen compound catabolic process	BP	0.110577	208	3.12795	Bckdha;Bckdhb;Bckdk;Cd44;Cpe;Gba;Gda;Gstz1;Aadat;Nt5e;Aass;Smpdl3a;Acad8;Pnpla8;Chid1;Ddo;Nudt9;Nudt16;Aldh6a1;Paox;Chil6;Thnsl2;Csad;Acadl;Ace;Actn3;Ada;Gla;Aicda;Aox1;Apobec1;Arg1;Arg2;Auh;Bcat1;Bcat2;Cdo1;Cel;Chil1;Ovgp1;Tpp1;Comt;Ctsh;Dao;Dio2;Enpep;Fah;Fgf2;Gad2;Galc;Ggt1;Gls;Glud1;Gm2a;Rack1;Got1;Got2;Hal;Hdc;Hexa;Hexb;Hgd;Hint1;Hmox1;Hmox2;Hprt;Hyal1;Hyal2;Ide;Ido1;Idua;Itpa;Anpep;Ldlr;Lta…	23	Bckdha;Bckdhb;Bckdk;Cd44;Cpe;Gba;Gda;Gstz1;Aadat;Nt5e;Aass;Smpdl3a;Acad8;Pnpla8;Chid1;Ddo;Nudt9;Nudt16;Aldh6a1;Paox;Chil6;Thnsl2;Csad
GO:0016042	brown	lipid catabolic process	BP	0.108597	221	3.1003	Gba;Phyh;Pex7;Plcb1;Mgll;Eci2;Pla2g2f;Lgals12;Hacl1;Smpdl3a;Pla2g12a;Etfdh;Acad8;Pnpla8;Abhd5;Crot;Gpcpd1;Acad11;Etfb;Hsd17b11;Apob;Gcdh;Mettl20;Enpp6;Acadl;Acadm;Acadvl;Acads;Acox1;Adora1;Adra2a;Adrb2;Gla;Akt1;Akt2;Abcd1;Prdx6;Apoa1;Apoa2;Apoc3;Apoe;Apoh;Cel;Cidea;Cnr1;Cpt1a;Crabp1;Cyp1a2;Cyp1b1;Cyp26a1;Cyp27b1;Cyp46a1;Dbi;Eci1;Drd1;Ptprv;Faah;Akr1b8;Lpin1;Galc;Gm2a;Bscl2;Gpld1;Hadh;Hao1;Hexa;He…	24	Gba;Phyh;Pex7;Plcb1;Mgll;Eci2;Pla2g2f;Lgals12;Hacl1;Smpdl3a;Pla2g12a;Etfdh;Acad8;Pnpla8;Abhd5;Crot;Gpcpd1;Acad11;Etfb;Hsd17b11;Apob;Gcdh;Mettl20;Enpp6
GO:0009108	brown	coenzyme biosynthetic process	BP	0.137931	87	3.09649	Pcbd1;Dhfr;Nfs1;Pts;Snca;Adck3;Coq9;Nadk2;Nmnat3;Mat2b;Pdk1;Gcdh;Mat1a;Coq7;Dld;Fpgs;G6pdx;Gart;Gch1;Mocs2;Mthfd2;Pdha1;Pdk2;Spr;Pdk4;Pdhx;Vkorc1;Tpk1;Coq5;Mpc1;Pdss1;Mlycd;Mocs1;Nampt;Acss2;Ndufa9;Nmnat1;Ppcdc;Lipt2;Qprt;Dcakd;Pdhb;Aspdh;Mocos;Acss1;Mocs3;Nmrk2;Acot7;Mpc2;Kynu;Pdss2;Ubiad1;Coasy;Coq2;Pcbd2;Pank2;Pank1;Nadsyn1;Lias;Kmo;Acacb;Pnpo;Acly;Ppcs;Haao;Mthfs;Atic;Mthfd1;Qdpr;Nadk;Pank3;P…	12	Pcbd1;Dhfr;Nfs1;Pts;Snca;Adck3;Coq9;Nadk2;Nmnat3;Mat2b;Pdk1;Gcdh
GO:0000062	brown	fatty-acyl-CoA binding	MF	0.1875	32	3.06076	Scp2;Eci2;Acad8;Acbd5;Acad11;Gcdh;Acadl;Acadm;Acadvl;Acads;Acox1;Dbi;Dbil5;Hmgcl;Hnf4a;Pitpna;Soat1;Ivd;Acadsb;Eci3;Acot7;Acad10;Acbd6;Acoxl;Acbd7;Acox3;Hadha;Etfa;Acbd3;Soat2;Acad9;Hadhb	6	Scp2;Eci2;Acad8;Acbd5;Acad11;Gcdh
GO:00313001	brown	intrinsic component of organelle membrane	CC	0.107623	223	3.05263	Bnip3;G6pc2;Gdap1;P2rx4;St8sia4;Vamp5;Ndfip1;Asph;Emc3;Etfdh;Tvp23b;Derl1;Saraf;Apool;Pink1;Spcs1;Pex11g;Derl3;Tmem70;Armcx3;Fundc1;Insig2;Elovl4;Pigk;Abcd1;Aup1;Bak1;Bid;Calr;Cln3;Cpt1a;Creb3;Atf6b;Cux1;Cyp2e1;Dhcr7;Dmpk;Dpm2;Ext1;Fkbp8;Slc37a4;B4galnt1;Bscl2;Gpaa1;Pdia3;Hspa5;H13;Itm2b;Lfng;Lrmp;Mfng;Sypl2;Emc8;P2rx1;P2rx7;P2rx6;Pcsk7;Pex11a;Pex11b;Pex16;Pkd2;Sypl;Ppox;Pex2;Rce1;Rdh16;Rfng;Scd1…	24	Bnip3;G6pc2;Gdap1;P2rx4;St8sia4;Vamp5;Ndfip1;Asph;Emc3;Etfdh;Tvp23b;Derl1;Saraf;Apool;Pink1;Spcs1;Pex11g;Derl3;Tmem70;Armcx3;Fundc1;Insig2;Elovl4;Pigk
GO:00444321	brown	endoplasmic reticulum part	CC	0.0936768	427	3.01679	Casq2;Cav1;Ddost;Dnajc1;Eda;Edn1;Fkbp2;G6pc2;P4ha2;Rdh5;Rpn2;Ssr4;Rnf5;Pigb;Pigp;Serinc1;Asph;Emc3;Fkbp11;Alg5;Ormdl3;Erlec1;Edem3;Magt1;Srpr;Ufl1;Derl1;Saraf;Spcs1;Vrk2;Derl3;Insig2;Svip;Ddrgk1;Tusc3;Elovl4;Sep15;Triqk;Os9;Pigk;Ache;Adam10;Aldh3a2;Anxa7;Atp2a1;Atp2a2;Aup1;Bax;Bche;Bcl2;Hyou1;Pdia4;Calr;Calu;Canx;Capn2;Casq1;Cd4;Cftr;Cln3;Creb3;Atf6b;Pcyt1a;Cyba;Cyp2e1;Dad1;Dbi;Dgat1;Dhcr7;Dmpk;D…	40	Casq2;Cav1;Ddost;Dnajc1;Eda;Edn1;Fkbp2;G6pc2;P4ha2;Rdh5;Rpn2;Ssr4;Rnf5;Pigb;Pigp;Serinc1;Asph;Emc3;Fkbp11;Alg5;Ormdl3;Erlec1;Edem3;Magt1;Srpr;Ufl1;Derl1;Saraf;Spcs1;Vrk2;Derl3;Insig2;Svip;Ddrgk1;Tusc3;Elovl4;Sep15;Triqk;Os9;Pigk
GO:0004601	brown	peroxidase activity	MF	0.181818	33	2.97027	Gstz1;Mgst1;Mgst3;Gpx8;Gstk1;Sep15;Prdx3;Prdx6;Cat;Epx;Gpx1;Gpx2;Gpx3;Gstt1;Gstt2;Hba-a1;Ltc4s;Prdx1;Ptgs1;Ptgs2;Prdx2;Tpo;Txndc17;Prdx4;Prdx5;Gpx7;Pxdn;Iyd;Lpo;Hba-a2;Cygb;Mgst2;Gpx4	6	Gstz1;Mgst1;Mgst3;Gpx8;Gstk1;Sep15
GO:0006575	brown	cellular modified amino acid metabolic process	BP	0.113095	168	2.9464	Dhfr;Gdap1;Hagh;Gstm4;Gstm5;Gstz1;P4ha2;Tyms;Ggt5;Aadat;Hmgn5;Serinc1;Mgst1;Gatm;Ero1lb;Gsto2;Gstk1;Ctns;Mat2b;Mat1a;Ass1;Cacna1a;Cbs;Ckm;Comt;Crym;Dio2;Dnmt1;Dnmt3a;Dnmt3b;Dpep1;Eif2ak3;Folr1;Fpgs;G6pdx;Gamt;Gart;Gata3;Gch1;Ggh;Ggt1;Ghr;Gclc;Gclm;Gnmt;Gpx1;Gpx3;Gsr;Gss;Gstm1;Gstm2;Gstp2;Gstp1;Gstt1;Gstt2;Gsto1;Htt;Lipc;Hpn;Idh1;Ido1;Kcnj6;Mthfd2;Mthfr;Mut;Nfe2l2;Ocln;P4ha1;P4hb;Pax8;Pcmt1;Padi1;…	19	Dhfr;Gdap1;Hagh;Gstm4;Gstm5;Gstz1;P4ha2;Tyms;Ggt5;Aadat;Hmgn5;Serinc1;Mgst1;Gatm;Ero1lb;Gsto2;Gstk1;Ctns;Mat2b
GO:0005788	brown	endoplasmic reticulum lumen	CC	0.156863	51	2.94037	Casq2;Dnajc1;Edn1;Rdh5;Erlec1;Edem3;Sep15;Os9;Ache;Bche;Pdia4;Calr;Calu;Casq1;Cd4;Hspa5;Lrpap1;Lyz2;Lyz1;Ptprn2;Rdh16;Resp18;Hsp90b1;Vtn;Slc27a2;Tor1a;Tor2a;Tor1b;Tor3a;Txndc12;Dnajc10;Erp29;Rnaset2b;Kdelc2;Mzb1;Txndc16;Pdia6;Kdelc1;Tmem43;Erp44;Cln6;Erap1;Ces1d;Txndc5;Gbf1;Poglut1;Colgalt1;Foxred2;Uggt1;Dnajc3;Rnaset2a	8	Casq2;Dnajc1;Edn1;Rdh5;Erlec1;Edem3;Sep15;Os9
GO:0050662	brown	coenzyme binding	MF	0.110497	181	2.91099	Adh7;Dhfr;Scp2;Sord;Eci2;Hacl1;Aldh1a3;Sirt3;Acad8;Marc2;Akr1b10;Ddo;Aifm3;Acbd5;Srd5a1;Tyw1;Acad11;Ndufs2;Cbr4;Gcdh;Acadl;Acadm;Acadvl;Acads;Acox1;Adh1;Parp1;Alas2;Aldh2;Gfer;Aox1;Cat;Cry2;Crym;Cryz;Ctbp1;Ctbp2;Cybb;Dao;Dbi;Dbil5;Dld;Fasn;Fdxr;Fmo1;Fmo5;G6pdx;Gapdhs;Gch1;Gpd1;Gclc;Glud1;Gsr;Hadh;Hsd17b10;Hao1;Hmbs;Hmgcl;Hmgcr;Hnf4a;Hpgd;Hsd11b1;Hsd11b2;Hsd3b4;Idh1;Idh3g;Insr;Kcnab1;Ldhb;Maoa;Me1…	20	Adh7;Dhfr;Scp2;Sord;Eci2;Hacl1;Aldh1a3;Sirt3;Acad8;Marc2;Akr1b10;Ddo;Aifm3;Acbd5;Srd5a1;Tyw1;Acad11;Ndufs2;Cbr4;Gcdh
GO:0051188	brown	cofactor biosynthetic process	BP	0.123894	113	2.89913	Pcbd1;Dhfr;Nfs1;Pts;Snca;Urod;Uros;Adck3;Coq9;Nadk2;Nmnat3;Mat2b;Pdk1;Gcdh;Alas1;Alas2;Mat1a;Ank1;Atpif1;Coq7;Cpox;Dld;Fech;Fpgs;Fxn;G6pdx;Gart;Gch1;Hmbs;Alad;Mocs2;Mthfd2;Slc11a2;Pdha1;Pdk2;Ppox;Sptb;Spr;Hnf1a;Pdk4;Pdhx;Vkorc1;Tpk1;Coq5;Snx3;Mpc1;Pdss1;Mlycd;Mocs1;Nampt;Acss2;Ireb2;Ndufa9;Tmem14c;Nmnat1;Ppcdc;Lipt2;Qprt;Slc25a39;Dcakd;Pdhb;Aspdh;Mocos;Acss1;Mocs3;Nmrk2;Bdh2;Acot7;Cox10;Mpc2;Kynu…	14	Pcbd1;Dhfr;Nfs1;Pts;Snca;Urod;Uros;Adck3;Coq9;Nadk2;Nmnat3;Mat2b;Pdk1;Gcdh
GO:0008748	brown	N-ethylmaleimide reductase activity	MF	0.176471	34	2.88315	Heph;Marc2;Aifm3;Enox2;Oxnad1;Cbr4;Cybb;Fmo1;Frrs1;Vat1;Marc1;Cryzl1;Gfod2;Noxred1;Aifm2;Hsdl2;Cybrd1;Glyr1;Pyroxd2;4833439L19Rik;Kdm1a;Sccpdh;Kdm1b;Zadh2;Cyb561a3;BC026585;Fmo6;Phyhd1;Foxred1;Nox1;Enox1;Vat1l;Gfod1;Fa2h	6	Heph;Marc2;Aifm3;Enox2;Oxnad1;Cbr4
GO:0009066	brown	aspartate family amino acid metabolic process	BP	0.176471	34	2.88315	Aass;Nit2;Apip;Asnsd1;Ddo;Nmnat3;Adssl1;Adss;Ass1;Gnmt;Got1;Got2;Mthfr;Pipox;Asns;Tdh;Bhmt2;Nmnat1;Asrgl1;Aasdhppt;Enoph1;Mri1;Tha1;Ahcyl2;Aspg;Adi1;Mthfd1;Mtrr;Nmnat2;Ahcyl1;Phgdh;Mtr;Ahcy;Mthfd2l	6	Aass;Nit2;Apip;Asnsd1;Ddo;Nmnat3
GO:0016684	brown	oxidoreductase activity, acting on peroxide as acceptor	MF	0.176471	34	2.88315	Gstz1;Mgst1;Mgst3;Gpx8;Gstk1;Sep15;Prdx3;Prdx6;Cat;Epx;Gpx1;Gpx2;Gpx3;Gstt1;Gstt2;Hba-a1;Ltc4s;Prdx1;Ptgs1;Ptgs2;Prdx2;Tpo;Txndc17;Prdx4;Prdx5;Park7;Gpx7;Pxdn;Iyd;Lpo;Hba-a2;Cygb;Mgst2;Gpx4	6	Gstz1;Mgst1;Mgst3;Gpx8;Gstk1;Sep15
GO:0032527	brown	protein exit from endoplasmic reticulum	BP	0.176471	34	2.88315	Erlec1;Derl1;Derl3;Svip;Sec16b;Os9;Aup1;H13;Sel1l;Sorl1;Hsp90b1;Ube2g2;Ufd1l;Bcap31;Ube2j1;Rangrf;Herpud1;Sec61b;Tmem129;Ubac2;Tmem30a;Gcc2;Syvn1;Slc35d3;Faf2;Rhbdd1;Edem2;Vimp;Derl2;Edem1;Nploc4;Yod1;Tmem30b;Vcp	6	Erlec1;Derl1;Derl3;Svip;Sec16b;Os9
GO:0043738	brown	reduced coenzyme F420 dehydrogenase activity	MF	0.176471	34	2.88315	Heph;Marc2;Aifm3;Enox2;Oxnad1;Cbr4;Cybb;Fmo1;Frrs1;Vat1;Marc1;Cryzl1;Gfod2;Noxred1;Aifm2;Hsdl2;Cybrd1;Glyr1;Pyroxd2;4833439L19Rik;Kdm1a;Sccpdh;Kdm1b;Zadh2;Cyb561a3;BC026585;Fmo6;Phyhd1;Foxred1;Nox1;Enox1;Vat1l;Gfod1;Fa2h	6	Heph;Marc2;Aifm3;Enox2;Oxnad1;Cbr4
GO:0043826	brown	sulfur oxygenase reductase activity	MF	0.176471	34	2.88315	Heph;Marc2;Aifm3;Enox2;Oxnad1;Cbr4;Cybb;Fmo1;Frrs1;Vat1;Marc1;Cryzl1;Gfod2;Noxred1;Aifm2;Hsdl2;Cybrd1;Glyr1;Pyroxd2;4833439L19Rik;Kdm1a;Sccpdh;Kdm1b;Zadh2;Cyb561a3;BC026585;Fmo6;Phyhd1;Foxred1;Nox1;Enox1;Vat1l;Gfod1;Fa2h	6	Heph;Marc2;Aifm3;Enox2;Oxnad1;Cbr4
GO:0043883	brown	malolactic enzyme activity	MF	0.176471	34	2.88315	Heph;Marc2;Aifm3;Enox2;Oxnad1;Cbr4;Cybb;Fmo1;Frrs1;Vat1;Marc1;Cryzl1;Gfod2;Noxred1;Aifm2;Hsdl2;Cybrd1;Glyr1;Pyroxd2;4833439L19Rik;Kdm1a;Sccpdh;Kdm1b;Zadh2;Cyb561a3;BC026585;Fmo6;Phyhd1;Foxred1;Nox1;Enox1;Vat1l;Gfod1;Fa2h	6	Heph;Marc2;Aifm3;Enox2;Oxnad1;Cbr4
GO:0052693	brown	epoxyqueuosine reductase activity	MF	0.176471	34	2.88315	Heph;Marc2;Aifm3;Enox2;Oxnad1;Cbr4;Cybb;Fmo1;Frrs1;Vat1;Marc1;Cryzl1;Gfod2;Noxred1;Aifm2;Hsdl2;Cybrd1;Glyr1;Pyroxd2;4833439L19Rik;Kdm1a;Sccpdh;Kdm1b;Zadh2;Cyb561a3;BC026585;Fmo6;Phyhd1;Foxred1;Nox1;Enox1;Vat1l;Gfod1;Fa2h	6	Heph;Marc2;Aifm3;Enox2;Oxnad1;Cbr4
GO:0006631	brown	fatty acid metabolic process	BP	0.0989761	293	2.87557	Adh7;Cav1;Cyp2j6;Edn1;Phyh;Pex7;Snca;Nr1h3;Ggt5;Mgll;Eci2;Ech1;Nucb2;Hacl1;Etfdh;Acad8;Pnpla8;Abhd5;Insig2;Crot;Elovl4;Acad11;Etfb;Pecr;Pdk1;Thnsl2;Cbr4;Gcdh;Mettl20;Acadl;Acadm;Acadvl;Acads;Acox1;Agt;Akt1;Akt2;Abcd1;Alox12;Alox12b;Alox8;Alox5;Alox5ap;Fabp4;Apoa1;Apoa2;Baat;Brca1;C3;Cd36;Ch25h;Cnr1;Cpt1a;Cpt1b;Cpt2;Crat;Cyp1b1;Cyp2a5;Cyp2e1;Cyp2j5;Dbi;Eci1;Degs1;Dgat1;Dld;Edn2;Eif2ak3;Ephx2;Faah;…	29	Adh7;Cav1;Cyp2j6;Edn1;Phyh;Pex7;Snca;Nr1h3;Ggt5;Mgll;Eci2;Ech1;Nucb2;Hacl1;Etfdh;Acad8;Pnpla8;Abhd5;Insig2;Crot;Elovl4;Acad11;Etfb;Pecr;Pdk1;Thnsl2;Cbr4;Gcdh;Mettl20
GO:0016645	brown	oxidoreductase activity, acting on the CH-NH group of donors	MF	0.192308	26	2.8621	Dhfr;Aass;Etfdh;Pycr1;Paox;Crym;Mthfd2;Mthfr;Prodh;Pipox;Aifm1;Prodh2;Pycrl;Pycr2;Noxred1;Aifm2;Aldh1l1;Mthfd1;Qdpr;Sardh;Aldh4a1;Aldh1l2;Smox;Blvrb;Mthfd1l;Mthfd2l	5	Dhfr;Aass;Etfdh;Pycr1;Paox
GO:0030258	brown	lipid modification	BP	0.1125	160	2.84275	Adh7;Phyh;Pex7;Plpp1;Inpp5k;Eci2;Nucb2;Hacl1;Etfdh;Acad8;Plpp5;Crot;Ip6k2;Acad11;Etfb;Pik3c3;Gcdh;Mettl20;Abcg1;Acadl;Acadm;Acadvl;Acads;Acox1;Agt;Agtr1a;Akt1;Akt2;Abcd1;Alox12;Apoa1;Apoa2;Apod;Apoe;Cd36;Cnr1;Cpt1a;Dbi;Eci1;Dgat1;Ephx2;Fabp3;B4galnt1;Hadh;Hao1;Hsd17b4;Inpp1;Inpp5b;Inpp5d;Inppl1;Irs1;Lcat;Mtm1;Nr4a3;Pik3c2a;Pik3c2g;Pik3ca;Pik3cd;Pik3r3;Pip5k1a;Por;Ppara;Ppard;Pparg;Ppargc1a;Pten;A…	18	Adh7;Phyh;Pex7;Plpp1;Inpp5k;Eci2;Nucb2;Hacl1;Etfdh;Acad8;Plpp5;Crot;Ip6k2;Acad11;Etfb;Pik3c3;Gcdh;Mettl20
GO:0016798	brown	hydrolase activity, acting on glycosyl bonds	MF	0.108696	184	2.83146	Art5;Glb1;Cd38;Cd44;Gba;Nthl1;Ogg1;Pigb;Smpdl3a;Fuca2;Edem3;Chid1;Fuca1;Gbe1;Glt8d1;Galnt15;Chil6;Galnt5;Glb1l2;Neil2;Ace;Ache;Adprh;Gla;Amy1;Prdx6;Bche;Bst1;Cel;Chil1;Ovgp1;Ces1e;Fut4;Fut7;Ganab;Gaa;Galc;B4galt1;Gm2a;Hexa;Hexb;Hpse;Hyal1;Hyal2;Idua;Kl;Large;Lyz2;Lyz1;Man1a;Man1a2;Man2a1;Man2b1;Man2b2;Mbd4;Naga;Neu1;Otog;Pcna;Smpd1;Tdg;Ung;Neu2;Parg;B3galt1;B3galt2;Rps3;Hrasls;Naglu;Nagpa;Gne;Neu…	20	Art5;Glb1;Cd38;Cd44;Gba;Nthl1;Ogg1;Pigb;Smpdl3a;Fuca2;Edem3;Chid1;Fuca1;Gbe1;Glt8d1;Galnt15;Chil6;Galnt5;Glb1l2;Neil2
GO:1990748	brown	cellular detoxification	BP	0.150943	53	2.81529	Dhfr;Gstm5;Mgst1;Mgst3;Gsto2;Gpx8;Gstk1;Sep15;Prdx3;Prdx6;Apoe;Atp7a;Cat;Cd36;Fancc;Gch1;Gpx1;Gpx2;Gpx3;Gsr;Gstm2;Gstt1;Gstt2;Gsto1;Nfe2l2;Nqo1;Nos3;Prdx1;Rgn;Sod1;Sod2;Sod3;Prdx2;Tnf;Fbln5;Txnrd2;Txnrd1;Txndc17;Prdx5;Apom;Park7;Gpx7;Gstm7;Pxdn;Fam213a;Ubiad1;Vimp;Cygb;Mgst2;Txndc2;Szt2;Kdm3b;Gpx4	8	Dhfr;Gstm5;Mgst1;Mgst3;Gsto2;Gpx8;Gstk1;Sep15
GO:0043914	brown	NADPH:sulfur oxidoreductase activity	MF	0.171429	35	2.79917	Heph;Marc2;Aifm3;Enox2;Oxnad1;Cbr4;Cybb;Fmo1;Frrs1;Vat1;Marc1;Cryzl1;Gfod2;Noxred1;Aifm2;Hsdl2;Cybrd1;Glyr1;Pyroxd2;4833439L19Rik;Kdm1a;Sccpdh;Kdm1b;Zadh2;Cyb561a3;BC026585;Fmo6;Phyhd1;Foxred1;Nox1;Enox1;Vat1l;Mical2;Gfod1;Fa2h	6	Heph;Marc2;Aifm3;Enox2;Oxnad1;Cbr4
GO:0071466	brown	cellular response to xenobiotic stimulus	BP	0.159091	44	2.7931	E2f1;Gstm4;Gstm5;Rora;As3mt;Gsto2;Pon3;Ahr;Ahrr;Aip;Cryz;Cyp1a1;Cyp1b1;Cyp2e1;Cyp46a1;Acsl1;Grin1;Gstm2;Gstt1;Gsto1;Hnf4a;Mcm7;Nr1i2;Pcna;Rb1;Rorc;Sult1a1;Ugt1a2;Akr1c13;Slco1a6;Fmo2;Sult1b1;Gstm7;Lpo;Ugt1a6a;Nceh1;Ugt1a10;Ugt1a7c;Ugt1a5;Ugt1a9;Ugt1a6b;Ugt1a1;Ugt1a8;Akr1c12	7	E2f1;Gstm4;Gstm5;Rora;As3mt;Gsto2;Pon3
GO:0030970	brown	retrograde protein transport, ER to cytosol	BP	0.185185	27	2.76022	Erlec1;Derl1;Derl3;Svip;Os9;Aup1;H13;Sel1l;Hsp90b1;Ube2g2;Ufd1l;Bcap31;Ube2j1;Herpud1;Sec61b;Tmem129;Ubac2;Syvn1;Faf2;Rhbdd1;Edem2;Vimp;Derl2;Edem1;Nploc4;Yod1;Vcp	5	Erlec1;Derl1;Derl3;Svip;Os9
GO:0043030	brown	regulation of macrophage activation	BP	0.185185	27	2.76022	Cd200;Rora;Snca;Nr1h3;Shpk;Slc7a2;Cd1d1;Cd84;Hspd1;Il4;Il4ra;Lbp;Lgals9;Il1rl1;Tff2;Thbs1;Wnt5a;Pla2g10;Stap1;Muc5b;Il33;Ulbp1;Hamp;Havcr2;Adgrf5;Tnip2;Bpi	5	Cd200;Rora;Snca;Nr1h3;Shpk
GO:0009636	brown	response to toxic substance	BP	0.114286	140	2.74721	Ddc;Dhfr;Ephx1;Gstm5;Gucy2c;Scn3a;Xpa;Mgst1;Mgst3;Gsto2;Pink1;Gpx8;Gstk1;Sep15;Pon3;Pon2;Ahr;Alpl;Aoc3;Prdx3;Prdx6;Apoe;Arnt;Arnt2;Ass1;Atp7a;Bak1;Bax;Bcl2;Ciita;Cat;Cd36;Cdkn1b;Cnp;Crip1;Cyp1a1;Cyp1b1;Drd2;Endog;Ephx2;Ezh2;Fancc;Fas;Gabrb1;Gch1;Gpx1;Gpx2;Gpx3;Gsr;Gstm2;Gstt1;Gstt2;Gsto1;Hdac2;Hdac6;Hif1a;Htr1b;Htr1d;Slc6a4;Hyal1;Id1;Jak1;Jak2;Lcn2;Mbp;Mef2c;Mt1;Mt2;Nfe2l2;Nqo1;Nos3;Nr4a2;Oprd1;P…	16	Ddc;Dhfr;Ephx1;Gstm5;Gucy2c;Scn3a;Xpa;Mgst1;Mgst3;Gsto2;Pink1;Gpx8;Gstk1;Sep15;Pon3;Pon2
GO:00162361	brown	macroautophagy	BP	0.0963455	301	2.7207	Bnip3;Bnip3l;Rb1cc1;Ctsd;Gba;Myom1;Nbr1;Nme2;Nthl1;Vamp8;Atg13;Stbd1;Rnf5;Wdr45;Gabarapl1;Trp53inp1;Map1lc3b;Snap29;Rbm18;Pink1;Gabra5;Atg9b;Fez2;Pik3c3;Pdk1;Slc17a9;Yipf1;Atg4a;Atg14;Adrb2;Anxa5;Atg5;Atp1b1;Atp6v0a1;Atpif1;Tspo;Calca;Car7;Cdc37;Cln3;Ackr3;Cox8a;Hapln1;Csnk2a2;Ctsk;Cttn;Dcn;Eif2s1;Stom;Epm2a;Fancc;Fgf14;Fgf7;Fzd5;Slc37a4;Bloc1s1;Kat2a;Gdf5;Hist2h3c1;Hc;Hdac6;Hif1a;Hk2;Hmox1;Kcnk3…	29	Bnip3;Bnip3l;Rb1cc1;Ctsd;Gba;Myom1;Nbr1;Nme2;Nthl1;Vamp8;Atg13;Stbd1;Rnf5;Wdr45;Gabarapl1;Trp53inp1;Map1lc3b;Snap29;Rbm18;Pink1;Gabra5;Atg9b;Fez2;Pik3c3;Pdk1;Slc17a9;Yipf1;Atg4a;Atg14
GO:0042180	brown	cellular ketone metabolic process	BP	0.111111	153	2.70638	Bmp5;Cav1;Hagh;Kat2b;Scp2;Snca;Nr1h3;Aadat;Nucb2;Pnkd;Adck3;Coq9;Insig2;Srd5a1;Pdk1;Cbr4;Mettl20;Acadl;Acadvl;Agt;Akt1;Akt2;Akr1b3;Apc;Apoa1;Bmp2;Bmp6;Brca1;Cbr1;Cnr1;Comt;Coq7;Cpt1a;Cyp17a1;Cyp21a1;Dab2;Dbi;Dgat1;Eif2ak3;Fabp3;Fgf15;Fgfr4;Akr1b8;Gata3;Gcg;Kat2a;Gpd1;Gpi1;Gk;Hmgcr;Hnf4a;Hpn;Hsd17b1;Ido1;Ins2;Irs1;Atcay;Kcnma1;Anxa1;Nr4a3;Pax8;Pdk2;Prkce;Pla2g4a;Ppara;Pparg;Ppargc1a;Prkg1;Prox1;Re…	17	Bmp5;Cav1;Hagh;Kat2b;Scp2;Snca;Nr1h3;Aadat;Nucb2;Pnkd;Adck3;Coq9;Insig2;Srd5a1;Pdk1;Cbr4;Mettl20
GO:00421751	brown	nuclear outer membrane-endoplasmic reticulum membrane network	CC	0.0932203	354	2.70415	Cav1;Ddost;Eda;Fkbp2;G6pc2;Rpn2;Snca;Ssr4;Nucb2;Rnf5;Pigb;Serinc1;Asph;Emc3;Fkbp11;Alg5;Ormdl3;Magt1;Srpr;Ufl1;Derl1;Saraf;Spcs1;Vrk2;Derl3;Insig2;Svip;Ddrgk1;Tusc3;Elovl4;Triqk;Os9;Pigk;Aldh3a2;Anxa7;Atp2a1;Atp2a2;Aup1;Bax;Bcl2;Calr;Canx;Cd4;Cftr;Cln3;Creb3;Atf6b;Pcyt1a;Cyp2e1;Dad1;Dgat1;Dhcr7;Dmpk;Dpagt1;Dpm1;Dpm2;Dst;Ebp;Rhbdf1;Eif2ak3;Emd;Ext1;Ext2;Faf1;Fkbp1a;Fkbp1b;Fkbp4;Fkbp5;Fkbp10;Fkbp7;…	33	Cav1;Ddost;Eda;Fkbp2;G6pc2;Rpn2;Snca;Ssr4;Nucb2;Rnf5;Pigb;Serinc1;Asph;Emc3;Fkbp11;Alg5;Ormdl3;Magt1;Srpr;Ufl1;Derl1;Saraf;Spcs1;Vrk2;Derl3;Insig2;Svip;Ddrgk1;Tusc3;Elovl4;Triqk;Os9;Pigk
GO:0016765	brown	transferase activity, transferring alkyl or aryl (other than methyl) groups	MF	0.145455	55	2.69582	Gdap1;Gstm4;Gstm5;Gstz1;Mgst1;Mgst3;Gsto2;Gstk1;Mat1a;Fdft1;Fnta;Ggps1;Gsta3;Gsta4;Gstm1;Gstm2;Gstm3;Gstm6;Gstp2;Gstp1;Gstt1;Gstt2;Gsto1;Hmbs;Ltc4s;Rabggtb;Sms;Srm;Nus1;Hpgds;Pdss1;Rabggta;Eef1e1;Trit1;Eef1g;Dhdds;Dph2;Sec14l2;Gstm7;Cox10;Pdss2;Ubiad1;Coq2;Ptar1;Mmab;Nans;Gstt3;Fdps;Fntb;Mgst2;Pggt1b;Agps;Gdap1l1;Mat2a;Dhps	8	Gdap1;Gstm4;Gstm5;Gstz1;Mgst1;Mgst3;Gsto2;Gstk1
GO:0032787	brown	monocarboxylic acid metabolic process	BP	0.0887446	462	2.68718	Adh7;Bpgm;Cav1;Cyp2j6;Edn1;Hagh;Phyh;P4ha2;Pex7;Pfkm;Snca;Nr1h3;Ggt5;Mgll;Eci2;Btd;Ech1;Nucb2;Pnkd;Hacl1;Aldh1a3;As3mt;Etfdh;Acad8;Pnpla8;Abhd5;Ero1lb;Insig2;Crot;Elovl4;Acad11;Mpi;Etfb;Pecr;Pdk1;Thnsl2;Cbr4;Pon3;Gcdh;Dsel;Mettl20;Acadl;Acadm;Acadvl;Acads;Acox1;Actn3;Aspa;Adh1;Agt;Akt1;Akt2;Abcd1;Aldh1a1;Aldoa;Aldoc;Alox12;Alox12b;Alox8;Alox5;Alox5ap;Fabp4;Apoa1;Apoa2;Baat;Brca1;C3;Cbfa2t3;Cd36;E…	41	Adh7;Bpgm;Cav1;Cyp2j6;Edn1;Hagh;Phyh;P4ha2;Pex7;Pfkm;Snca;Nr1h3;Ggt5;Mgll;Eci2;Btd;Ech1;Nucb2;Pnkd;Hacl1;Aldh1a3;As3mt;Etfdh;Acad8;Pnpla8;Abhd5;Ero1lb;Insig2;Crot;Elovl4;Acad11;Mpi;Etfb;Pecr;Pdk1;Thnsl2;Cbr4;Pon3;Gcdh;Dsel;Mettl20
GO:0004520	brown	endodeoxyribonuclease activity	MF	0.127907	86	2.68479	Rida;Nthl1;Ogg1;Pter;Dnase2b;Bphl;4931406C07Rik;Mgme1;Rexo2;Harbi1;Neil2;Apex1;Dmc1;Dnase1;Dnase1l3;Dnase2a;Ercc1;Fen1;Hmga1;Hmga2;Mre11a;Endou;Ptbp1;Rad50;Rad51;Rad51d;Tsn;Wrn;Ercc5;Exo1;Rps3;Ercc4;Slx4;Xrcc2;Dtd1;Gdpd1;Dnase1l2;Rexo1;Eri1;Iah1;Aen;Serhl;Gdpd3;Dnase1l1;Cmbl;Tatdn1;Eri2;Mus81;Smug1;Aplf;Neil1;Exo5;Xrcc3;Meiob;Slx1b;Mpped2;Apex2;Dbr1;Enpp5;Smg6;Pelo;Hmga1-rs1;Rad51c;Eri3;Dclre1b;D…	11	Rida;Nthl1;Ogg1;Pter;Dnase2b;Bphl;4931406C07Rik;Mgme1;Rexo2;Harbi1;Neil2
GO:0090317	brown	negative regulation of intracellular protein transport	BP	0.127907	86	2.68479	Cdk5;Itgb1bp1;Pkia;Ppm1a;Inpp5k;Tacc3;Erlec1;Derl3;Svip;Os9;Lyplal1;Angpt1;Akap1;Apod;Axin2;Bard1;Cd36;Creb3;Csk;Emd;Dmtn;Faf1;Fzd1;Gas6;Gdi1;Hdac3;Hnf4a;Mdfic;Gbp4;Fam89b;Nf1;Nfkbia;Nfkbib;Nov;Pkd1;Pkd2;Pkig;Lypla1;Ppm1b;Ppp2ca;Rab23;Rangap1;Snai2;Sox4;Thra;Trip6;Txn1;Ube2g2;Apc2;Mapk7;Sufu;Slc9a3r1;Keap1;Tnfsf14;Psmd10;Sfrp5;Ccdc22;Ube2j1;Chp1;Gsk3b;Mtor;Litaf;Park7;Lrrk2;Bag4;Ubac2;Dyrk2;Dab2i…	11	Cdk5;Itgb1bp1;Pkia;Ppm1a;Inpp5k;Tacc3;Erlec1;Derl3;Svip;Os9;Lyplal1
GO:0009262	brown	deoxyribonucleotide metabolic process	BP	0.178571	28	2.66296	Adk;Rrm2;Tyms;Nudt16;Tbpl1;Ada;Ak2;Guk1;Nudt1;Pnp;Rrm1;Shmt1;Dtymk;Cmpk2;Dguok;Nt5c;Samhd1;Ak3;Tk2;Cmpk1;Mgea5;Nt5m;Dut;Nudt18;Nudt15;Dera;Rrm2b;Ak9	5	Adk;Rrm2;Tyms;Nudt16;Tbpl1
GO:0030659	brown	cytoplasmic vesicle membrane	CC	0.107143	168	2.61881	Car4;Cav1;Cav2;Cpe;Ica1;Snap91;Snca;Vamp8;Golga5;Vamp5;Tmed2;Copz2;Tmed3;Necap1;Rassf9;Rab5a;Rab26;Znrf2;Adam8;Anxa3;Anxa7;Ap1s1;Aqp1;Rab27a;Bsg;Cftr;Clta;Copa;Dmbt1;Dab2;Drd2;Epn2;Eps15;Flot2;Gad2;Gria2;Htt;Itm2b;Cuzd1;Itpr1;Kcnq1;Kif1b;Lamp1;Lamp2;Cd46;Msn;Slc11a1;Gpr143;Pam;Furin;Pcsk4;Pnliprp2;Ptprn2;Rph3a;Sec23a;Selp;Sema4c;Slc2a3;Slc2a4;Sparc;Stx1a;Abcc8;Syn1;Syn2;Syngr1;Syngr2;Syngr3;Syp;S…	18	Car4;Cav1;Cav2;Cpe;Ica1;Snap91;Snca;Vamp8;Golga5;Vamp5;Tmed2;Copz2;Tmed3;Necap1;Rassf9;Rab5a;Rab26;Znrf2
GO:0030792	brown	methylarsonite methyltransferase activity	MF	0.12987	77	2.6127	Tfb2m;As3mt;Mettl21a;Hemk1;Mettl10;Mettl23;Smyd2;6430573F11Rik;Mettl20;Prdm14;Prdm1;Fbl;Emg1;Trmt2a;Prmt5;Mettl17;Trmt10c;Mettl2;Ftsj3;Setd6;Wbscr22;Dimt1;Mettl6;Rnmtl1;Mettl16;Alkbh8;Setd8;Ftsj2;Eef1akmt1;Comtd1;Ndufaf5;Trmt10b;Mettl18;Eef2kmt;Prdm5;Nsun7;Mettl13;Prmt3;Nsun4;Prdm4;Armt1;Trmt11;Nsun6;Trmo;Bcdin3d;Mettl5;Mettl4;Mettl15;Ehmt1;Trmt1l;Nsun5;B630005N14Rik;Rrp8;Prmt9;Nsun3;Ece2;Trmt10a…	10	Tfb2m;As3mt;Mettl21a;Hemk1;Mettl10;Mettl23;Smyd2;6430573F11Rik;Mettl20;Prdm14
GO:0032410	brown	negative regulation of transporter activity	BP	0.148936	47	2.59246	Actn2;Casq2;Cav1;Fgf12;Snca;Ndfip1;Tcaf2;Agrn;Ank3;Apoa2;Crhr1;Drd2;Drd3;Fkbp1b;Gnb5;Gsto1;Insr;Kcnab1;Kcnq1;Mmp9;Oprl1;Pkd2;Ppp2ca;Twist1;Sumo1;Grk6;Slc9a3r1;Stk39;Ubqln1;Kcne3;Wwp2;Gstm7;Stoml1;Ano9;Ndfip2;Cttnbp2nl;Tlr9;Nedd4l;Atp1a2;Pcsk9;Ppif;Camk2d;Oxsr1;Sri;Kcne2;Kcnrg;Cbarp	7	Actn2;Casq2;Cav1;Fgf12;Snca;Ndfip1;Tcaf2
GO:0098754	brown	detoxification	BP	0.140351	57	2.58149	Dhfr;Gstm5;Mgst1;Mgst3;Gsto2;Gpx8;Gstk1;Sep15;Prdx3;Prdx6;Apoe;Atp7a;Cat;Cd36;Fancc;Gch1;Gpx1;Gpx2;Gpx3;Gsr;Gstm2;Gstt1;Gstt2;Gsto1;Mt1;Mt2;Nfe2l2;Nqo1;Nos3;Prdx1;Rgn;Sod1;Sod2;Sod3;Prdx2;Tnf;Slc30a1;Slc30a3;Fbln5;Txnrd2;Txnrd1;Txndc17;Prdx5;Apom;Park7;Gpx7;Gstm7;Pxdn;Fam213a;Ubiad1;Vimp;Cygb;Mgst2;Txndc2;Szt2;Kdm3b;Gpx4	8	Dhfr;Gstm5;Mgst1;Mgst3;Gsto2;Gpx8;Gstk1;Sep15
GO:0012506	brown	vesicle membrane	CC	0.102564	195	2.55197	Car4;Cav1;Cav2;Clcn3;Cpe;Ica1;Snap91;Snca;Vamp8;Golga5;Vamp5;Tmed2;Copz2;Tmed3;Necap1;Rassf9;Apob;Rab5a;Rab26;Znrf2;Adam8;Agtr1a;Anxa3;Anxa4;Anxa7;Ap1s1;Aqp1;Rab27a;Atp2a2;Bsg;Cftr;Clta;Copa;Dmbt1;Dab2;Drd2;Enpep;Epn2;Eps15;Flot2;Gad2;Grb2;Gria2;Htt;Itm2b;Cuzd1;Itpr1;Kcnq1;Kif1b;Lamp1;Lamp2;Anpep;Cd46;Msn;Myo6;Nck1;Nck2;Nos1;Nos2;Nos3;Slc11a1;Gpr143;Pam;Furin;Pcsk4;Pikfyve;Pnliprp2;Ptprn2;Rph3a;S…	20	Car4;Cav1;Cav2;Clcn3;Cpe;Ica1;Snap91;Snca;Vamp8;Golga5;Vamp5;Tmed2;Copz2;Tmed3;Necap1;Rassf9;Apob;Rab5a;Rab26;Znrf2
GO:00057891	brown	endoplasmic reticulum membrane	CC	0.0919881	337	2.54054	Cav1;Ddost;Eda;Fkbp2;G6pc2;Rpn2;Ssr4;Rnf5;Pigb;Serinc1;Asph;Emc3;Fkbp11;Alg5;Ormdl3;Magt1;Srpr;Ufl1;Derl1;Saraf;Spcs1;Vrk2;Derl3;Insig2;Svip;Ddrgk1;Tusc3;Elovl4;Triqk;Os9;Pigk;Aldh3a2;Anxa7;Atp2a1;Atp2a2;Aup1;Bax;Bcl2;Calr;Canx;Cd4;Cftr;Cln3;Creb3;Atf6b;Pcyt1a;Cyp2e1;Dad1;Dgat1;Dhcr7;Dmpk;Dpagt1;Dpm1;Dpm2;Dst;Ebp;Rhbdf1;Eif2ak3;Ext1;Ext2;Faf1;Fkbp1a;Fkbp1b;Fkbp4;Fkbp5;Fkbp10;Fkbp7;Fkbp8;Slc37a4;B…	31	Cav1;Ddost;Eda;Fkbp2;G6pc2;Rpn2;Ssr4;Rnf5;Pigb;Serinc1;Asph;Emc3;Fkbp11;Alg5;Ormdl3;Magt1;Srpr;Ufl1;Derl1;Saraf;Spcs1;Vrk2;Derl3;Insig2;Svip;Ddrgk1;Tusc3;Elovl4;Triqk;Os9;Pigk
GO:0030170	brown	pyridoxal phosphate binding	MF	0.145833	48	2.52902	Ddc;Nfs1;Aadat;Marc2;Thnsl1;Thnsl2;Csad;Alas1;Alas2;Alb;Cbs;Gad1;Gad2;Got1;Got2;Hdc;Oat;Pygm;Sgpl1;Shmt1;Sptlc2;Srr;Marc1;Mocos;Ccbl1;Kynu;Etnppl;Phykpl;Gadl1;Gpt;Pdxdc1;Gldc;Cth;Shmt2;Gpt2;Pygb;Pygl;Prosc;Pdxk;Ccbl2;Sds;Tat;Sdsl;Sptlc1;Agxt2;Abat;Accs;Accsl	7	Ddc;Nfs1;Aadat;Marc2;Thnsl1;Thnsl2;Csad
GO:0032370	brown	positive regulation of lipid transport	BP	0.145833	48	2.52902	Edn1;Abcb4;Scp2;Tnfrsf11a;Nr1h3;Nucb2;C1qtnf1;Abca1;Abcg1;Apoe;Atp8a1;Bmp6;Runx1;Cyp2j5;Dab2;Gal;Galr1;Il1a;Il1b;Lipg;Lrp1;Mif;Nfkbia;Ntsr1;P2rx7;P2ry2;Prkcd;Pla2r1;Pltp;Ptch1;Tac1;Nr1h2;Map2k6;Mapk9;Pla2g10;Abca7;Atp8a2;Pla2g6;Ghrl;Prelid1;Triap1;Cyp4f18;Sirt1;Acat2;Acsl6;Fam132b;Tmf1;Acsl5	7	Edn1;Abcb4;Scp2;Tnfrsf11a;Nr1h3;Nucb2;C1qtnf1
GO:0016628	brown	oxidoreductase activity, acting on the CH-CH group of donors, NAD or NADP as acceptor	MF	0.137931	58	2.52611	Heph;Marc2;Aifm3;Srd5a1;Pecr;Enox2;Oxnad1;Cbr4;Cybb;Dhcr7;Fasn;Fmo1;Frrs1;Decr2;Mecr;Vat1;Srd5a3;Marc1;Dus2;Cryzl1;Ptgr1;Decr1;Dus1l;Bdh2;Gfod2;Noxred1;Aifm2;Dhdh;Dus4l;Hsdl2;Tm7sf2;Cybrd1;Glyr1;Pyroxd2;Dhcr24;Ptgr2;Akr1c21;4833439L19Rik;Lbr;Dpyd;Kdm1a;Sccpdh;Blvra;Akr1d1;Kdm1b;Dus3l;Zadh2;Cyb561a3;BC026585;Fmo6;Phyhd1;Blvrb;Foxred1;Nox1;Enox1;Vat1l;Gfod1;Fa2h	8	Heph;Marc2;Aifm3;Srd5a1;Pecr;Enox2;Oxnad1;Cbr4
GO:1903828	brown	negative regulation of cellular protein localization	BP	0.112903	124	2.51896	Actn2;Cdk5;Itgb1bp1;Pkia;Ppm1a;Inpp5k;Tacc3;Tmem59;Erlec1;Derl3;Svip;Os9;Lyplal1;Leprot;Angpt1;Akap1;Ap2m1;Apod;Axin2;Bard1;Bcl2l1;Cd36;Creb3;Csk;Dab2;Dclk1;Emd;Dmtn;Faf1;Fzd1;Gas6;Gdi1;Gpm6b;Hdac3;Hnf4a;Hsph1;Mdfic;Gbp4;Fam89b;Commd1;Nf1;Nfkbia;Nfkbib;Nov;Numb;Pkd1;Pkd2;Pkig;Lypla1;Ppm1b;Ppp2ca;Rab23;Rangap1;Sin3a;Snai2;Sox4;Terf1;Tgfb1;Thra;Trip6;Txn1;Ube2g2;Apc2;Mapk7;Sufu;H2afy;Slc9a3r1;Keap1…	14	Actn2;Cdk5;Itgb1bp1;Pkia;Ppm1a;Inpp5k;Tacc3;Tmem59;Erlec1;Derl3;Svip;Os9;Lyplal1;Leprot
GO:0006730	brown	one-carbon metabolic process	BP	0.166667	30	2.48085	Car4;Dhfr;Tyms;Car5b;Mat2b;Mat1a;Car8;Car2;Car5a;Car7;Fpgs;Gnmt;Mthfd2;Mthfr;Shmt1;Car13;Ahcyl2;Car12;Aldh1l1;Mthfs;Shmt2;Mthfd1;Sardh;Aldh1l2;Ahcyl1;Car9;Mat2a;Mthfd1l;Mthfd2l;Mthfsl	5	Car4;Dhfr;Tyms;Car5b;Mat2b
GO:0006790	brown	sulfur compound metabolic process	BP	0.0970464	237	2.4555	Gdap1;Hagh;Gstm4;Gstm5;Gstz1;Scp2;Snca;Ggt5;Btd;Hmgn5;Apip;Mgst1;Sqrdl;Gsto2;Mcee;Isca2;Gstk1;Ctns;Mat2b;Pdk1;Csad;Gcdh;Dsel;Angpt1;Mat1a;Baat;Bgn;Cacna1a;Ctnnb1;Cbs;Cdo1;Comt;Cs;Dcn;Dgat1;Dld;Dnmt1;Dnmt3a;Dnmt3b;Dpep1;Eif2ak3;Ext1;Ext2;Fasn;G6pdx;Gamt;Ggt1;Ghr;Gclc;Gclm;Gnmt;Gpam;Gpc1;Gpx1;Gpx3;Gsr;Gss;Gstm1;Gstm2;Gstp2;Gstp1;Gstt1;Gstt2;Gsto1;Hmgcl;Hnf4a;Hpse;Lipc;Hsd17b4;Ndst1;Idh1;Idua;Igf1;N…	23	Gdap1;Hagh;Gstm4;Gstm5;Gstz1;Scp2;Snca;Ggt5;Btd;Hmgn5;Apip;Mgst1;Sqrdl;Gsto2;Mcee;Isca2;Gstk1;Ctns;Mat2b;Pdk1;Csad;Gcdh;Dsel
GO:0016627	brown	oxidoreductase activity, acting on the CH-CH group of donors	MF	0.116505	103	2.44926	Heph;Htatip2;Acad8;Marc2;Aifm3;Srd5a1;Acad11;Pecr;Enox2;Oxnad1;Cbr4;Gcdh;Acadl;Acadm;Acadvl;Acads;Acox1;Adh5;Cpox;Ctbp1;Cybb;Dhcr7;Fasn;Fmo1;H2-Ke6;Hsd11b2;Kcnab1;Kcnab2;Ppox;Frrs1;Decr2;Mecr;Aifm1;Vat1;Akr1c13;Ivd;Dhodh;Srd5a3;Sdhc;Marc1;Dus2;Cryzl1;Acadsb;Sdhd;Sdha;Ptgr1;Retsat;Decr1;Sdhb;Dus1l;Bdh2;Sdr9c7;Gfod2;Noxred1;Aifm2;Dhdh;Dus4l;Acad10;Hsdl2;Tm7sf2;Cybrd1;Glyr1;Sdr42e1;Acoxl;Pyroxd2;Dhc…	12	Heph;Htatip2;Acad8;Marc2;Aifm3;Srd5a1;Acad11;Pecr;Enox2;Oxnad1;Cbr4;Gcdh
GO:0055088	brown	lipid homeostasis	BP	0.116505	103	2.44926	Cav1;Abcb4;Rora;Nr1h3;Usf1;Ormdl3;Acad8;Col4a3bp;Acad11;Apob;Gcdh;Nr1d2;Abca1;Abcg1;Acadl;Acadm;Acadvl;Acads;Acox1;Adrb1;Fabp4;Apoa1;Apoa2;Apoc3;Apoe;Cd24a;Cebpa;Dgat1;Ehd1;Ephx2;Fabp3;Fgfr4;Slc37a4;Got1;Gpam;Hnf4a;Lipc;Hpn;Ins2;Lcat;Ldlr;Lipg;Lpl;Lrp5;Lyst;Mttp;Npc1;Pold1;Pex2;Ncor1;Nr1h4;Soat1;Scarb1;Srebf2;Nr1h2;Usf2;Xbp1;Nr5a2;Pla2g10;Abcg5;Slco1a6;Angptl3;Nus1;Ivd;Angptl4;Mlxipl;Lamtor1;Acad…	12	Cav1;Abcb4;Rora;Nr1h3;Usf1;Ormdl3;Acad8;Col4a3bp;Acad11;Apob;Gcdh;Nr1d2
GO:1901136	brown	carbohydrate derivative catabolic process	BP	0.116505	103	2.44926	Cd44;Gba;Nt5e;Ngly1;Fuca2;Edem3;Chid1;Fuca1;Nudt9;Nudt16;Chil6;Adamts12;Ada;Gla;Aicda;Apobec1;Chil1;Ovgp1;Cst3;Fgf2;Galc;Galt;Gpd1;Gm2a;Rack1;Gpc1;Hexa;Hexb;Hint1;Hpse;Hprt;Hyal1;Hyal2;Idua;Itpa;Mgat1;Nudt1;Naga;Neu1;Pde1a;Pde1b;Pde1c;Pde3b;Pde4a;Pde4b;Pde9a;Prkcd;Pnliprp2;Pnp;Renbp;Tgfb1;Pglyrp1;Upp1;Neu2;Pde10a;Gnpda1;Fbxo6;Nt5c;Neu3;Pde3a;Samhd1;Nagk;Mlycd;Pglyrp2;Pycrl;Entpd4;Nudt7;Stt3b;Chit…	12	Cd44;Gba;Nt5e;Ngly1;Fuca2;Edem3;Chid1;Fuca1;Nudt9;Nudt16;Chil6;Adamts12
GO:0019842	brown	vitamin binding	MF	0.128571	70	2.4446	Adh7;Dhfr;Gc;Phyh;P4ha2;Tyms;Hacl1;Akr1b10;C8g;Calb1;Comp;Crabp1;Crabp2;Folr1;Folr2;Gnmt;P3h3;Mut;Ogdh;P4ha1;Pam;Pcx;Plod1;Aldh1a2;Rbp1;Rbp2;Rbp3;Rbp4;Rlbp1;Slc19a1;Tcn2;Tkt;Vdr;Plod2;Plod3;Adh4;Tpk1;Opn4;Ttpa;Slc46a1;Cd320;Ggcx;P3h1;Rbp7;Cubn;Ogfod3;Ogfod2;Mmachc;Lmbrd1;P4htm;Acacb;Acaca;Mthfs;Pygl;Hlcs;Egln1;Egln2;Egln3;Bspry;Sardh;Dhtkd1;P3h2;Rho;Pdxk;Ilvbl;Mtr;Ogfod1;Afm;P4ha3;Mthfsl	9	Adh7;Dhfr;Gc;Phyh;P4ha2;Tyms;Hacl1;Akr1b10;C8g
GO:0097164	brown	ammonium ion metabolic process	BP	0.110236	127	2.42202	Ddc;Gba;Plpp1;Snca;Pnkd;Smpdl3a;Pnpla8;Sat2;Crot;Sgpp1;Abhd3;Paox;Cbr4;Enpp6;Acadl;Acadm;Ache;Chrnb2;Agtr1a;Akr1b3;Amd1;Apoa1;Apoa2;Atp2b2;Atp7a;Bche;Chat;Chkb;Chka;Cln3;Comt;Cpt1a;Crat;Pcyt1a;Dao;Dbi;Dnmt1;Dnmt3a;Dnmt3b;Drd1;Drd2;Fabp3;Fgf7;Akr1b8;Gch1;Grin2a;Hdc;Lipc;Hprt;Fabp5;Lcat;Ldlr;Maoa;Mecp2;Npr1;Nr4a2;Odc1;Pde1b;Enpp2;Pemt;Prkcd;Pla2g1b;Pla2g5;Sat1;Slc22a5;Smpd1;Sms;Sphk1;Spr;Sptlc2;Sca…	14	Ddc;Gba;Plpp1;Snca;Pnkd;Smpdl3a;Pnpla8;Sat2;Crot;Sgpp1;Abhd3;Paox;Cbr4;Enpp6
GO:0006805	brown	xenobiotic metabolic process	BP	0.15	40	2.4196	Gstm4;Gstm5;Rora;As3mt;Gsto2;Pon3;Ahr;Ahrr;Aip;Cryz;Cyp1a1;Cyp1b1;Cyp2e1;Cyp46a1;Acsl1;Grin1;Gstm2;Gstt1;Gsto1;Hnf4a;Nr1i2;Rorc;Sult1a1;Ugt1a2;Akr1c13;Slco1a6;Fmo2;Sult1b1;Gstm7;Lpo;Ugt1a6a;Nceh1;Ugt1a10;Ugt1a7c;Ugt1a5;Ugt1a9;Ugt1a6b;Ugt1a1;Ugt1a8;Akr1c12	6	Gstm4;Gstm5;Rora;As3mt;Gsto2;Pon3
GO:0009410	brown	response to xenobiotic stimulus	BP	0.14	50	2.40679	E2f1;Gstm4;Gstm5;Rora;As3mt;Gsto2;Pon3;Ahr;Ahrr;Aip;Arnt2;Cryz;Cyp1a1;Cyp1b1;Cyp2e1;Cyp46a1;Acsl1;Gclc;Gpx1;Grin1;Gstm2;Gstt1;Gsto1;Hnf4a;Mcm7;Nr1i2;Pcna;Rb1;Rorc;Sult1a1;Ugt1a2;Akr1c13;Slco1a6;Fmo2;Sult1b1;Gstm7;Slitrk5;Lpo;Ugt1a6a;Rhbdd3;Tigar;Nceh1;Ugt1a10;Ugt1a7c;Ugt1a5;Ugt1a9;Ugt1a6b;Ugt1a1;Ugt1a8;Akr1c12	7	E2f1;Gstm4;Gstm5;Rora;As3mt;Gsto2;Pon3
GO:0098869	brown	cellular oxidant detoxification	BP	0.14	50	2.40679	Dhfr;Mgst1;Mgst3;Gsto2;Gpx8;Gstk1;Sep15;Prdx3;Prdx6;Apoe;Atp7a;Cat;Cd36;Fancc;Gch1;Gpx1;Gpx2;Gpx3;Gsr;Gstt1;Gstt2;Gsto1;Nfe2l2;Nqo1;Nos3;Prdx1;Rgn;Sod1;Sod2;Sod3;Prdx2;Tnf;Fbln5;Txnrd2;Txnrd1;Txndc17;Prdx5;Apom;Park7;Gpx7;Pxdn;Fam213a;Ubiad1;Vimp;Cygb;Mgst2;Txndc2;Szt2;Kdm3b;Gpx4	7	Dhfr;Mgst1;Mgst3;Gsto2;Gpx8;Gstk1;Sep15
GO:0016836	brown	hydro-lyase activity	MF	0.131148	61	2.3666	Car4;Pcbd1;Uros;Car5b;Apip;Sirt3;Wdyhv1;Gmds;Aco1;Aco2;Auh;Car8;Car2;Car5a;Car7;Cbs;Eno1;Eno2;Eno3;Fasn;Fh1;Hmbs;Hsd17b4;Alad;Ntan1;Car14;Tor3a;Hacd1;Sirt6;Park7;Hacd3;Sirt2;Acer3;Uba5;Hacd4;Naaa;L3hypdh;Sirt5;Ydjc;Carkd;Hacd2;Car13;Pcbd2;Macrod2;Ehhadh;Sirt4;Tgds;Car12;Car15;Echs1;Sirt1;Hadha;Oard1;Macrod1;Sirt7;Pddc1;Eno4;Hibch;Car9;Hadhb;Uroc1	8	Car4;Pcbd1;Uros;Car5b;Apip;Sirt3;Wdyhv1;Gmds
GO:0008907	brown	integrase activity	MF	0.137255	51	2.34786	Rida;Pter;Bphl;4931406C07Rik;Mgme1;Rexo2;Harbi1;Apex1;Fen1;Endou;Tsn;Wrn;Ercc5;Exo1;Ercc4;Dtd1;Gdpd1;Rexo1;Eri1;Iah1;Aen;Serhl;Gdpd3;Cmbl;Eri2;Exo5;Meiob;Slx1b;Mpped2;Apex2;Dbr1;Enpp5;Smg6;Pelo;Eri3;Dclre1b;Pld6;Gen1;Rbbp8;Mppe1;Zranb3;Dclre1c;Rexo4;Isg20l2;Zc3h12a;Gdpd5;Zc3h12d;Pgap1;Zc3h12c;Dna2;Dtd2	7	Rida;Pter;Bphl;4931406C07Rik;Mgme1;Rexo2;Harbi1
GO:0043765	brown	T/G mismatch-specific endonuclease activity	MF	0.137255	51	2.34786	Rida;Pter;Bphl;4931406C07Rik;Mgme1;Rexo2;Harbi1;Apex1;Fen1;Endou;Tsn;Wrn;Ercc5;Exo1;Ercc4;Dtd1;Gdpd1;Rexo1;Eri1;Iah1;Aen;Serhl;Gdpd3;Cmbl;Eri2;Exo5;Meiob;Slx1b;Mpped2;Apex2;Dbr1;Enpp5;Smg6;Pelo;Eri3;Dclre1b;Pld6;Gen1;Rbbp8;Mppe1;Zranb3;Dclre1c;Rexo4;Isg20l2;Zc3h12a;Gdpd5;Zc3h12d;Pgap1;Zc3h12c;Dna2;Dtd2	7	Rida;Pter;Bphl;4931406C07Rik;Mgme1;Rexo2;Harbi1
GO:0044823	brown	retroviral integrase activity	MF	0.137255	51	2.34786	Rida;Pter;Bphl;4931406C07Rik;Mgme1;Rexo2;Harbi1;Apex1;Fen1;Endou;Tsn;Wrn;Ercc5;Exo1;Ercc4;Dtd1;Gdpd1;Rexo1;Eri1;Iah1;Aen;Serhl;Gdpd3;Cmbl;Eri2;Exo5;Meiob;Slx1b;Mpped2;Apex2;Dbr1;Enpp5;Smg6;Pelo;Eri3;Dclre1b;Pld6;Gen1;Rbbp8;Mppe1;Zranb3;Dclre1c;Rexo4;Isg20l2;Zc3h12a;Gdpd5;Zc3h12d;Pgap1;Zc3h12c;Dna2;Dtd2	7	Rida;Pter;Bphl;4931406C07Rik;Mgme1;Rexo2;Harbi1
GO:0044824	brown	retroviral 3' processing activity	MF	0.137255	51	2.34786	Rida;Pter;Bphl;4931406C07Rik;Mgme1;Rexo2;Harbi1;Apex1;Fen1;Endou;Tsn;Wrn;Ercc5;Exo1;Ercc4;Dtd1;Gdpd1;Rexo1;Eri1;Iah1;Aen;Serhl;Gdpd3;Cmbl;Eri2;Exo5;Meiob;Slx1b;Mpped2;Apex2;Dbr1;Enpp5;Smg6;Pelo;Eri3;Dclre1b;Pld6;Gen1;Rbbp8;Mppe1;Zranb3;Dclre1c;Rexo4;Isg20l2;Zc3h12a;Gdpd5;Zc3h12d;Pgap1;Zc3h12c;Dna2;Dtd2	7	Rida;Pter;Bphl;4931406C07Rik;Mgme1;Rexo2;Harbi1
GO:0044433	brown	cytoplasmic vesicle part	CC	0.100559	179	2.32991	Car4;Cav1;Cav2;Cpe;Ica1;Snap91;Snca;Vamp8;Golga5;Vamp5;Tmed2;Copz2;Tmed3;Necap1;Rassf9;Rab5a;Rab26;Znrf2;Acr;Adam8;Anxa3;Anxa7;Ap1s1;Aqp1;Rab27a;Bsg;Cftr;Clta;Copa;Dmbt1;Dab2;Dld;Drd2;Egfr;Epn2;Eps15;Flot2;Gad2;Gria2;Htt;Itm2b;Cuzd1;Itpr1;Kcnq1;Kif1b;Lamp1;Lamp2;Cd46;Sypl2;Msn;Slc11a1;Gpr143;Pam;Furin;Pcsk4;Pnliprp2;Sypl;Ptprn2;Rph3a;Sec23a;Selp;Sema4c;Slc2a3;Slc2a4;Sparc;Stx1a;Abcc8;Syn1;Syn2;Sy…	18	Car4;Cav1;Cav2;Cpe;Ica1;Snap91;Snca;Vamp8;Golga5;Vamp5;Tmed2;Copz2;Tmed3;Necap1;Rassf9;Rab5a;Rab26;Znrf2
GO:0016525	brown	negative regulation of angiogenesis	BP	0.123288	73	2.30551	Cd59a;Col4a3;Itgb1bp1;Tek;Foxo4;Ecscr;Mmrn2;Adgrb3;Stard13;Adamts1;Adrb2;Angpt2;Angpt4;Agt;Apoh;Rhoa;Cd36;Cxcr3;Ccr2;Col4a2;Crhr2;Cx3cr1;Dcn;Epha2;Fasl;Gtf2i;Hdac5;Hhex;Hoxa5;Cxcl10;Klf4;Lif;Foxc1;Nf1;Ngfr;Notch1;Pde3b;Serpine1;Plg;Pml;Ptn;Ptprm;Rock1;Rock2;Ccl2;Serpinf1;Sema3e;Sema4a;Sparc;Stat1;Tcf4;Thbs1;Thbs2;Tie1;Map2k5;Synj2bp;Amot;Dll4;Pdcd10;Pf4;Rgcc;Dab2ip;Krit1;Adgrb1;Stab1;Flcn;Adgrb2;…	9	Cd59a;Col4a3;Itgb1bp1;Tek;Foxo4;Ecscr;Mmrn2;Adgrb3;Stard13
GO:0072376	brown	protein activation cascade	BP	0.134615	52	2.29029	Cd59a;Cr1l;Cd55;F8;C8g;Prcp;C1rl;Apoh;Serpinc1;Serping1;C1qa;C1qb;C1qbp;C1qc;C2;C3;C4b;C4bp;C6;Cfh;Cfi;Cr2;Crp;Cd55b;Fbln1;Fcna;Fga;Cfb;Hc;Ighm;Igkc;Krt1;Masp1;Masp2;Mbl1;Mbl2;Cd46;Cfp;Phb;C1s1;C1ra;F12;Rgcc;Mvp;Susd4;Fgg;Fgb;C8b;C1s2;Cd59b;C4a;C1rb	7	Cd59a;Cr1l;Cd55;F8;C8g;Prcp;C1rl
GO:19030081	brown	organelle disassembly	BP	0.0979381	194	2.27154	Bnip3l;Eif2d;Myom1;Nme2;Nthl1;Atg13;Wdr45;Hbs1l;Gabarapl1;Map1lc3b;Pink1;Fundc1;Gabra5;Atg9b;Pdk1;Slc17a9;Yipf1;Atg4a;Atg14;Adrb2;Anxa5;Atg5;Atp1b1;Atpif1;Tspo;Calca;Car7;Cdk1;Cdc37;Cdkn2a;Plk3;Cox8a;Hapln1;Csnk2a2;Ctsk;Cttn;Eif2s1;Stom;Fancc;Fzd5;Slc37a4;Bloc1s1;Kat2a;Gdf5;Hc;Hdac6;Hif1a;Hk2;Kcnk3;Kif5b;Kif9;Klc1;Krt15;Cd93;Mdh1;Mstn;Map1a;Myh11;Sqstm1;Pik3ca;Ppy;Prkg1;Rpl28;Sfrp4;Slc1a3;Snrpb;S…	19	Bnip3l;Eif2d;Myom1;Nme2;Nthl1;Atg13;Wdr45;Hbs1l;Gabarapl1;Map1lc3b;Pink1;Fundc1;Gabra5;Atg9b;Pdk1;Slc17a9;Yipf1;Atg4a;Atg14
GO:00421581	brown	lipoprotein biosynthetic process	BP	0.117647	85	2.2684	Ppm1a;Wdr45;Pigb;Pigp;Alg5;Atg10;Svip;Apob;Pigk;Atg4a;Abca1;Alox12b;Atg5;Apoa1;Apobec1;Apoe;Dpm1;Dpm2;Gpaa1;Pigq;Lcat;Mttp;Nmt1;Nmt2;Piga;Pigf;Ppm1b;Pign;Zdhhc8;Wipi1;Porcn;Pigo;Golga7;Zdhhc12;Pigyl;Pyurf;Atg4b;Wdr45b;Zdhhc6;Pigc;Atg12;Pigm;Zdhhc21;Dpm3;Zdhhc3;Pigw;Zdhhc2;Zdhhc1;Pigx;Zdhhc16;Atg7;Hhatl;Wipi2;Zdhhc20;Clip3;Pigt;Selk;Rab3gap2;Zdhhc7;Zdhhc15;Pigh;Map6d1;Zdhhc9;Zdhhc14;Mppe1;Rab3gap1…	10	Ppm1a;Wdr45;Pigb;Pigp;Alg5;Atg10;Svip;Apob;Pigk;Atg4a
GO:0030433	brown	ER-associated ubiquitin-dependent protein catabolic process	BP	0.126984	63	2.26534	Rnf103;Rnf5;Erlec1;Edem3;Derl1;Derl3;Svip;Os9;Aup1;Psmc1;Psmc2;Psmc3;Psmc5;Hsp90b1;Ube2g2;Ufd1l;Wfs1;Amfr;Psmc4;Bcap31;Dnajb9;Tor1a;Fbxo6;Ankzf1;Sgta;Ubqln2;Ubqln1;Ube2j1;Dnajb2;Usp14;Sdf2l1;Herpud1;Tmub1;Sec61b;Trim13;Dnajc10;Psmc6;Ccdc47;Ubxn4;Stt3b;Tmem129;Usp19;Syvn1;Rnf121;Faf2;Jkamp;Ubxn8;Edem2;Vimp;Derl2;Ube2j2;Edem1;Rnf185;Nrros;Erlin1;Yod1;Man1b1;AI314180;Fbxo2;Foxred2;Erlin2;Vcp;Tmem67	8	Rnf103;Rnf5;Erlec1;Edem3;Derl1;Derl3;Svip;Os9
GO:0010508	brown	positive regulation of autophagy	BP	0.121622	74	2.26063	Bnip3;Bnip3l;Gba;Mid2;Tmem59;Trp53inp1;Pink1;Svip;Atg14;Adrb2;Ager;Atg5;Dcn;Epm2a;Hif1a;Hmox1;Kdr;Sqstm1;Pafah1b2;Pim2;Pip4k2a;Rab12;Plk2;Sptlc2;Trim21;Stk11;Supt5;Tfeb;Tsc2;Ulk1;Xbp1;Tlr2;Mapk3;Eif2ak4;Mefv;Sh3glb1;Becn1;Scoc;Foxo1;Tbk1;Ralb;Trim13;Lrrk2;Mtdh;Trp53inp2;Wdfy3;Tbc1d5;Plekhf1;Larp1;Atg7;Uvrag;Tlr9;Trim8;Sirt1;Sh3bp4;Rab3gap2;Prkaa1;Nod1;Prkaa2;Pip4k2b;Pip4k2c;Ripk2;Flcn;Wac;Rab3gap…	9	Bnip3;Bnip3l;Gba;Mid2;Tmem59;Trp53inp1;Pink1;Svip;Atg14
GO:0019318	brown	hexose metabolic process	BP	0.0974359	195	2.24765	Glb1;Bpgm;Fbp2;G6pc2;Nr3c1;Kat2b;Pfkm;Inpp5k;Rora;Sord;Usf1;C1qtnf1;Pgm1;Fuca2;Fam132a;Fuom;Fuca1;Mpi;Pdk1;Acadm;Actn3;Adra1b;Akt1;Akt2;Aldoa;Apod;Atf3;Atf4;Bad;Gdf2;Cacna1a;Car5a;Clk2;Cpt1a;Cry1;Aimp1;Fbp1;G6pdx;Galt;Gapdh;Gapdhs;Gcg;Gcgr;Kat2a;Gpd1;Gpd2;Gfpt1;B4galt1;Galk1;Gnmt;Gpi1;Gpld1;Grb10;Hif1a;Hk1;Hk2;Hmgb1;Foxa2;Hnf4a;Onecut1;Hsd11b1;Igf1;Igf2;Igfbp3;Igfbp4;Igfbp5;Il6;Inppl1;Ins1;Ins2;I…	19	Glb1;Bpgm;Fbp2;G6pc2;Nr3c1;Kat2b;Pfkm;Inpp5k;Rora;Sord;Usf1;C1qtnf1;Pgm1;Fuca2;Fam132a;Fuom;Fuca1;Mpi;Pdk1
GO:00427751	brown	mitochondrial ATP synthesis coupled electron transport	BP	0.151515	33	2.23407	Snca;Taz;Coq9;Pink1;Cox4i2;Bdnf;Coq7;Cox4i1;Cox5a;Cox8a;Cycs;Cyct;Dld;Mecp2;CYTB;ND2;ND4;Uqcrc1;Park7;Sdhc;Sdhaf2;Dnajc15;Uqcr10;Ndufb9;Uqcrh;Uqcrc2;Ndufb8;Ndufa10;Uqcrb;Ndufc2;Ndufv2;Pmpcb;Uqcc3	5	Snca;Taz;Coq9;Pink1;Cox4i2
GO:0046503	brown	glycerolipid catabolic process	BP	0.151515	33	2.23407	Mgll;Pnpla8;Abhd5;Gpcpd1;Apob;Apoa1;Apoa2;Apoc3;Apoe;Apoh;Drd1;Gpld1;Lipc;Ldlr;Lipe;Lpl;Enpp2;Scarb1;Pik3cg;Fgf21;Abhd6;Pnpla2;Plin5;Ddhd2;Abhd12;Smpd4;Inpp5f;Ces1d;Pnpla3;Pla2g15;Pla2g4b;Pla2g4c;Dagla	5	Mgll;Pnpla8;Abhd5;Gpcpd1;Apob
GO:0045178	brown	basal part of cell	CC	0.132075	53	2.23403	Cav1;Cd34;Edn1;Tek;P2ry12;Prcp;Itga1;Ace;Ager;Ank3;Aqp1;Aqp4;Bmpr2;Cldn4;Dlg1;Mark2;Eps15;Erbb2;Fap;Hfe;Itga2;Itga6;Met;Myo1c;Slc11a2;Cldn11;Pkd2;Plec;Reg1;Slc23a1;Trf;Slc27a5;Homer3;Slc23a2;Slc16a8;Clasp2;Clasp1;Otof;Ldlrap1;Slco2b1;Phldb1;Gck;Itga9;Slco3a1;Itgb4;Phldb2;Shroom4;Rapgef3;Muc20;Clrn1;Adcy10;C5ar2;Myo1a	7	Cav1;Cd34;Edn1;Tek;P2ry12;Prcp;Itga1
GO:0006612	brown	protein targeting to membrane	BP	0.116279	86	2.22804	Cdk5;Itgb1bp1;Inpp5k;Tmed2;Srpr;Ssr3;Sec62;Sec63;Tcaf2;Atg4a;Macf1;Adora1;Akt2;Ank1;Ank3;Bsg;Cacnb1;Anxa2;Cdk5r1;Chm;Dmtn;Stom;Erbb2;Folr1;Folr2;Gas6;Gdi1;Hpca;Kcnb1;Myo1c;Ncf1;Palm;Pex16;Pip5k1a;Prkg2;Ptch1;Pex19;Pex5;Ccl2;Exoc4;Sptbn1;Srp14;Cib1;Srp54a;Micall1;Srp9;Myadm;Sec61a1;Arl6ip1;Pex3;Rabgef1;Ehd3;Tesc;Pdzk1;Srp19;Fis1;Atg4b;Srp72;Myl12a;Rtp4;Mtcl1;Zfand2b;Atp2c2;Nkd2;Pex26;C2cd5;Dusp18;…	10	Cdk5;Itgb1bp1;Inpp5k;Tmed2;Srpr;Ssr3;Sec62;Sec63;Tcaf2;Atg4a
GO:0006893	brown	Golgi to plasma membrane transport	BP	0.139535	43	2.2186	Vamp5;Golph3;Chic2;Stxbp6;Lyplal1;Rab26;Ank3;Csk;Dnm2;Rack1;Kif13a;Krt18;Llgl1;Commd1;Nsf;Lypla1;Rab10;Rab34;Sptbn1;Vamp2;Vamp3;Bbs1;Vamp4;Golga4;Ccdc22;Golga7;Blzf1;Sys1;Exoc2;Bbs2;Exoc1;Ccdc93;9030624J02Rik;Optn;Steap2;Acsl3;Arfrp1;Amn;Arfgef2;Pkdcc;Rab31;Cnst;D230025D16Rik	6	Vamp5;Golph3;Chic2;Stxbp6;Lyplal1;Rab26
GO:1903513	brown	endoplasmic reticulum to cytosol transport	BP	0.139535	43	2.2186	Casq2;Erlec1;Derl1;Derl3;Svip;Os9;Aup1;Casq1;Ccr5;Dmd;Fkbp1b;Gsto1;H13;Hrc;Pln;Ryr1;Ryr2;Sel1l;Slc8a1;Hsp90b1;Ube2g2;Ufd1l;Bcap31;Ube2j1;Herpud1;Sec61b;Gstm7;Tmem129;Ubac2;Syvn1;Faf2;Rhbdd1;Nol3;Camk2d;Edem2;Ank2;Vimp;Derl2;Edem1;Nploc4;Yod1;Pde4d;Vcp	6	Casq2;Erlec1;Derl1;Derl3;Svip;Os9
GO:0004536	brown	deoxyribonuclease activity	MF	0.112245	98	2.21003	Rida;Nthl1;Ogg1;Pter;Dnase2b;Bphl;4931406C07Rik;Mgme1;Rexo2;Harbi1;Neil2;Apex1;Dffb;Dmc1;Dnase1;Dnase1l3;Dnase2a;Endog;Ercc1;Fen1;Hmga1;Hmga2;Mre11a;Nme1;Pold1;Endou;Ptbp1;Rad1;Rad50;Rad51;Rad51d;Rad9a;Trex1;Tsn;Wrn;Ercc5;Trex2;Exo1;Rps3;Ercc4;Slx4;Dclre1a;Xrcc2;Isg20;Dtd1;Aptx;Gdpd1;Dnase1l2;Rexo1;Eri1;Iah1;Aen;Serhl;Gdpd3;Dnase1l1;Cmbl;Tatdn1;Eri2;Mus81;Smug1;Aplf;Neil1;Exo5;Xrcc3;Meiob;Slx1b;M…	11	Rida;Nthl1;Ogg1;Pter;Dnase2b;Bphl;4931406C07Rik;Mgme1;Rexo2;Harbi1;Neil2
GO:0016853	brown	isomerase activity	MF	0.104478	134	2.20562	Bpgm;Fkbp2;Gstz1;Eci2;Ech1;Fkbp11;Pgm1;Ero1lb;Gnpda2;Ebpl;Fuom;Mcee;Mpi;Dsel;Acadm;Pdia4;Eci1;Dct;Ebp;Fkbp1a;Fkbp1b;Fkbp4;Fkbp5;Fkbp10;Fkbp7;Fkbp8;Gpi1;Pdia3;Hsd17b4;Hsd3b2;Hsd3b3;Itgb3;Lss;Amacr;Mif;Mut;Nktr;P4hb;Pgam1;Ppib;Ppic;Ptgds;Ptgis;Ranbp2;Renbp;Rpia;Tbxas1;Top1;Top2a;Top2b;Top3a;Top3b;Tpi1;Tsta3;Aloxe3;Pin1;Gnpda1;Fkbp9;Srr;Pmm1;Fkbp3;Ero1l;Gne;Tmx4;Pmm2;Hpgds;Pgam2;Ppie;Fkbpl;Ptges3;Pu…	14	Bpgm;Fkbp2;Gstz1;Eci2;Ech1;Fkbp11;Pgm1;Ero1lb;Gnpda2;Ebpl;Fuom;Mcee;Mpi;Dsel
GO:00105061	brown	regulation of autophagy	BP	0.0978261	184	2.20511	Bnip3;Bnip3l;Rb1cc1;Gba;Snca;Mid2;Rnf5;Tmem59;Trp53inp1;Dram2;Map1lc3b;Pink1;Svip;Dapl1;Fez2;Slc17a9;Nrbf2;Atg14;Adrb2;Ager;Akt1;Atg5;Atm;Atp6v0a1;Bcl2;Tspo;Casp1;Cln3;Csnk2a2;Ctsk;Cttn;Dcn;Epm2a;Fzd5;Gata4;Kat2a;Gfap;Hif1a;Hmox1;Htr2b;Kdr;Lepr;Lmx1b;Mt3;Mapt;Mtm1;Npc1;Sqstm1;Pafah1b2;Pik3r2;Pikfyve;Pim2;Pip4k2a;Ctsa;Ptpn22;Rab12;Rab20;Rab33a;Rab33b;Rab7;Rpl28;Plk2;Sptlc2;Srebf1;Srebf2;Trim21;Stk…	18	Bnip3;Bnip3l;Rb1cc1;Gba;Snca;Mid2;Rnf5;Tmem59;Trp53inp1;Dram2;Map1lc3b;Pink1;Svip;Dapl1;Fez2;Slc17a9;Nrbf2;Atg14
GO:19036501	brown	negative regulation of cytoplasmic transport	BP	0.111111	99	2.17354	Casq2;Cdk5;Pkia;Ppm1a;Tacc3;Snx12;Erlec1;Derl3;Svip;Os9;Lyplal1;Angpt1;Akap1;Apod;Axin2;Bard1;Bcl2;Cd36;Creb3;Csk;Emd;Faf1;Fkbp1b;Fzd1;Gas6;Gsto1;Hdac3;Hnf4a;Hrc;Mdfic;Gbp4;Fam89b;Nf1;Nfkbia;Nfkbib;Nov;Ntsr1;Prkce;Pkd1;Pkd2;Pkig;Lypla1;Ppm1b;Ppp2ca;Rab23;Rangap1;Sar1a;Snai2;Sox4;Tgfb1;Tgfb2;Thra;Trip6;Txn1;Ube2g2;Apc2;Mapk7;Sufu;Slc9a3r1;Keap1;Tnfsf14;Psmd10;Snx3;Sfrp5;Ccdc22;Ube2j1;Chp1;Gsk3b;Mt…	11	Casq2;Cdk5;Pkia;Ppm1a;Tacc3;Snx12;Erlec1;Derl3;Svip;Os9;Lyplal1
GO:0000179	brown	rRNA (adenine-N6,N6-)-dimethyltransferase activity	MF	0.118421	76	2.17295	Tfb2m;Mettl21a;Hemk1;Mettl10;Mettl23;Smyd2;6430573F11Rik;Mettl20;Prdm14;Prdm1;Fbl;Emg1;Trmt2a;Prmt5;Mettl17;Trmt10c;Mettl2;Ftsj3;Setd6;Wbscr22;Dimt1;Mettl6;Rnmtl1;Mettl16;Alkbh8;Setd8;Ftsj2;Eef1akmt1;Comtd1;Ndufaf5;Trmt10b;Mettl18;Eef2kmt;Prdm5;Nsun7;Mettl13;Prmt3;Nsun4;Prdm4;Armt1;Trmt11;Nsun6;Trmo;Bcdin3d;Mettl5;Mettl4;Mettl15;Ehmt1;Trmt1l;Nsun5;B630005N14Rik;Rrp8;Prmt9;Nsun3;Ece2;Trmt10a;Nop2;…	9	Tfb2m;Mettl21a;Hemk1;Mettl10;Mettl23;Smyd2;6430573F11Rik;Mettl20;Prdm14
GO:0008650	brown	rRNA (uridine-2'-O-)-methyltransferase activity	MF	0.118421	76	2.17295	Tfb2m;Mettl21a;Hemk1;Mettl10;Mettl23;Smyd2;6430573F11Rik;Mettl20;Prdm14;Prdm1;Fbl;Emg1;Trmt2a;Prmt5;Mettl17;Trmt10c;Mettl2;Ftsj3;Setd6;Wbscr22;Dimt1;Mettl6;Rnmtl1;Mettl16;Alkbh8;Setd8;Ftsj2;Eef1akmt1;Comtd1;Ndufaf5;Trmt10b;Mettl18;Eef2kmt;Prdm5;Nsun7;Mettl13;Prmt3;Nsun4;Prdm4;Armt1;Trmt11;Nsun6;Trmo;Bcdin3d;Mettl5;Mettl4;Mettl15;Ehmt1;Trmt1l;Nsun5;B630005N14Rik;Rrp8;Prmt9;Nsun3;Ece2;Trmt10a;Nop2;…	9	Tfb2m;Mettl21a;Hemk1;Mettl10;Mettl23;Smyd2;6430573F11Rik;Mettl20;Prdm14
GO:0008988	brown	rRNA (adenine-N6-)-methyltransferase activity	MF	0.118421	76	2.17295	Tfb2m;Mettl21a;Hemk1;Mettl10;Mettl23;Smyd2;6430573F11Rik;Mettl20;Prdm14;Prdm1;Fbl;Emg1;Trmt2a;Prmt5;Mettl17;Trmt10c;Mettl2;Ftsj3;Setd6;Wbscr22;Dimt1;Mettl6;Rnmtl1;Mettl16;Alkbh8;Setd8;Ftsj2;Eef1akmt1;Comtd1;Ndufaf5;Trmt10b;Mettl18;Eef2kmt;Prdm5;Nsun7;Mettl13;Prmt3;Nsun4;Prdm4;Armt1;Trmt11;Nsun6;Trmo;Bcdin3d;Mettl5;Mettl4;Mettl15;Ehmt1;Trmt1l;Nsun5;B630005N14Rik;Rrp8;Prmt9;Nsun3;Ece2;Trmt10a;Nop2;…	9	Tfb2m;Mettl21a;Hemk1;Mettl10;Mettl23;Smyd2;6430573F11Rik;Mettl20;Prdm14
GO:0009383	brown	rRNA (cytosine-C5-)-methyltransferase activity	MF	0.118421	76	2.17295	Tfb2m;Mettl21a;Hemk1;Mettl10;Mettl23;Smyd2;6430573F11Rik;Mettl20;Prdm14;Prdm1;Fbl;Emg1;Trmt2a;Prmt5;Mettl17;Trmt10c;Mettl2;Ftsj3;Setd6;Wbscr22;Dimt1;Mettl6;Rnmtl1;Mettl16;Alkbh8;Setd8;Ftsj2;Eef1akmt1;Comtd1;Ndufaf5;Trmt10b;Mettl18;Eef2kmt;Prdm5;Nsun7;Mettl13;Prmt3;Nsun4;Prdm4;Armt1;Trmt11;Nsun6;Trmo;Bcdin3d;Mettl5;Mettl4;Mettl15;Ehmt1;Trmt1l;Nsun5;B630005N14Rik;Rrp8;Prmt9;Nsun3;Ece2;Trmt10a;Nop2;…	9	Tfb2m;Mettl21a;Hemk1;Mettl10;Mettl23;Smyd2;6430573F11Rik;Mettl20;Prdm14
GO:0016205	brown	selenocysteine methyltransferase activity	MF	0.118421	76	2.17295	Tfb2m;Mettl21a;Hemk1;Mettl10;Mettl23;Smyd2;6430573F11Rik;Mettl20;Prdm14;Prdm1;Fbl;Emg1;Trmt2a;Prmt5;Mettl17;Trmt10c;Mettl2;Ftsj3;Setd6;Wbscr22;Dimt1;Mettl6;Rnmtl1;Mettl16;Alkbh8;Setd8;Ftsj2;Eef1akmt1;Comtd1;Ndufaf5;Trmt10b;Mettl18;Eef2kmt;Prdm5;Nsun7;Mettl13;Prmt3;Nsun4;Prdm4;Armt1;Trmt11;Nsun6;Trmo;Bcdin3d;Mettl5;Mettl4;Mettl15;Ehmt1;Trmt1l;Nsun5;B630005N14Rik;Rrp8;Prmt9;Nsun3;Ece2;Trmt10a;Nop2;…	9	Tfb2m;Mettl21a;Hemk1;Mettl10;Mettl23;Smyd2;6430573F11Rik;Mettl20;Prdm14
GO:0016433	brown	rRNA (adenine) methyltransferase activity	MF	0.118421	76	2.17295	Tfb2m;Mettl21a;Hemk1;Mettl10;Mettl23;Smyd2;6430573F11Rik;Mettl20;Prdm14;Prdm1;Fbl;Emg1;Trmt2a;Prmt5;Mettl17;Trmt10c;Mettl2;Ftsj3;Setd6;Wbscr22;Dimt1;Mettl6;Rnmtl1;Mettl16;Alkbh8;Setd8;Ftsj2;Eef1akmt1;Comtd1;Ndufaf5;Trmt10b;Mettl18;Eef2kmt;Prdm5;Nsun7;Mettl13;Prmt3;Nsun4;Prdm4;Armt1;Trmt11;Nsun6;Trmo;Bcdin3d;Mettl5;Mettl4;Mettl15;Ehmt1;Trmt1l;Nsun5;B630005N14Rik;Rrp8;Prmt9;Nsun3;Ece2;Trmt10a;Nop2;…	9	Tfb2m;Mettl21a;Hemk1;Mettl10;Mettl23;Smyd2;6430573F11Rik;Mettl20;Prdm14
GO:0016434	brown	rRNA (cytosine) methyltransferase activity	MF	0.118421	76	2.17295	Tfb2m;Mettl21a;Hemk1;Mettl10;Mettl23;Smyd2;6430573F11Rik;Mettl20;Prdm14;Prdm1;Fbl;Emg1;Trmt2a;Prmt5;Mettl17;Trmt10c;Mettl2;Ftsj3;Setd6;Wbscr22;Dimt1;Mettl6;Rnmtl1;Mettl16;Alkbh8;Setd8;Ftsj2;Eef1akmt1;Comtd1;Ndufaf5;Trmt10b;Mettl18;Eef2kmt;Prdm5;Nsun7;Mettl13;Prmt3;Nsun4;Prdm4;Armt1;Trmt11;Nsun6;Trmo;Bcdin3d;Mettl5;Mettl4;Mettl15;Ehmt1;Trmt1l;Nsun5;B630005N14Rik;Rrp8;Prmt9;Nsun3;Ece2;Trmt10a;Nop2;…	9	Tfb2m;Mettl21a;Hemk1;Mettl10;Mettl23;Smyd2;6430573F11Rik;Mettl20;Prdm14
GO:0016435	brown	rRNA (guanine) methyltransferase activity	MF	0.118421	76	2.17295	Tfb2m;Mettl21a;Hemk1;Mettl10;Mettl23;Smyd2;6430573F11Rik;Mettl20;Prdm14;Prdm1;Fbl;Emg1;Trmt2a;Prmt5;Mettl17;Trmt10c;Mettl2;Ftsj3;Setd6;Wbscr22;Dimt1;Mettl6;Rnmtl1;Mettl16;Alkbh8;Setd8;Ftsj2;Eef1akmt1;Comtd1;Ndufaf5;Trmt10b;Mettl18;Eef2kmt;Prdm5;Nsun7;Mettl13;Prmt3;Nsun4;Prdm4;Armt1;Trmt11;Nsun6;Trmo;Bcdin3d;Mettl5;Mettl4;Mettl15;Ehmt1;Trmt1l;Nsun5;B630005N14Rik;Rrp8;Prmt9;Nsun3;Ece2;Trmt10a;Nop2;…	9	Tfb2m;Mettl21a;Hemk1;Mettl10;Mettl23;Smyd2;6430573F11Rik;Mettl20;Prdm14
GO:0018707	brown	1-phenanthrol methyltransferase activity	MF	0.118421	76	2.17295	Tfb2m;Mettl21a;Hemk1;Mettl10;Mettl23;Smyd2;6430573F11Rik;Mettl20;Prdm14;Prdm1;Fbl;Emg1;Trmt2a;Prmt5;Mettl17;Trmt10c;Mettl2;Ftsj3;Setd6;Wbscr22;Dimt1;Mettl6;Rnmtl1;Mettl16;Alkbh8;Setd8;Ftsj2;Eef1akmt1;Comtd1;Ndufaf5;Trmt10b;Mettl18;Eef2kmt;Prdm5;Nsun7;Mettl13;Prmt3;Nsun4;Prdm4;Armt1;Trmt11;Nsun6;Trmo;Bcdin3d;Mettl5;Mettl4;Mettl15;Ehmt1;Trmt1l;Nsun5;B630005N14Rik;Rrp8;Prmt9;Nsun3;Ece2;Trmt10a;Nop2;…	9	Tfb2m;Mettl21a;Hemk1;Mettl10;Mettl23;Smyd2;6430573F11Rik;Mettl20;Prdm14
GO:0019702	brown	protein-arginine N5-methyltransferase activity	MF	0.118421	76	2.17295	Tfb2m;Mettl21a;Hemk1;Mettl10;Mettl23;Smyd2;6430573F11Rik;Mettl20;Prdm14;Prdm1;Fbl;Emg1;Trmt2a;Prmt5;Mettl17;Trmt10c;Mettl2;Ftsj3;Setd6;Wbscr22;Dimt1;Mettl6;Rnmtl1;Mettl16;Alkbh8;Setd8;Ftsj2;Eef1akmt1;Comtd1;Ndufaf5;Trmt10b;Mettl18;Eef2kmt;Prdm5;Nsun7;Mettl13;Prmt3;Nsun4;Prdm4;Armt1;Trmt11;Nsun6;Trmo;Bcdin3d;Mettl5;Mettl4;Mettl15;Ehmt1;Trmt1l;Nsun5;B630005N14Rik;Rrp8;Prmt9;Nsun3;Ece2;Trmt10a;Nop2;…	9	Tfb2m;Mettl21a;Hemk1;Mettl10;Mettl23;Smyd2;6430573F11Rik;Mettl20;Prdm14
GO:0034541	brown	dimethylarsinite methyltransferase activity	MF	0.118421	76	2.17295	Tfb2m;Mettl21a;Hemk1;Mettl10;Mettl23;Smyd2;6430573F11Rik;Mettl20;Prdm14;Prdm1;Fbl;Emg1;Trmt2a;Prmt5;Mettl17;Trmt10c;Mettl2;Ftsj3;Setd6;Wbscr22;Dimt1;Mettl6;Rnmtl1;Mettl16;Alkbh8;Setd8;Ftsj2;Eef1akmt1;Comtd1;Ndufaf5;Trmt10b;Mettl18;Eef2kmt;Prdm5;Nsun7;Mettl13;Prmt3;Nsun4;Prdm4;Armt1;Trmt11;Nsun6;Trmo;Bcdin3d;Mettl5;Mettl4;Mettl15;Ehmt1;Trmt1l;Nsun5;B630005N14Rik;Rrp8;Prmt9;Nsun3;Ece2;Trmt10a;Nop2;…	9	Tfb2m;Mettl21a;Hemk1;Mettl10;Mettl23;Smyd2;6430573F11Rik;Mettl20;Prdm14
GO:0034807	brown	4,5-dihydroxybenzo(a)pyrene methyltransferase activity	MF	0.118421	76	2.17295	Tfb2m;Mettl21a;Hemk1;Mettl10;Mettl23;Smyd2;6430573F11Rik;Mettl20;Prdm14;Prdm1;Fbl;Emg1;Trmt2a;Prmt5;Mettl17;Trmt10c;Mettl2;Ftsj3;Setd6;Wbscr22;Dimt1;Mettl6;Rnmtl1;Mettl16;Alkbh8;Setd8;Ftsj2;Eef1akmt1;Comtd1;Ndufaf5;Trmt10b;Mettl18;Eef2kmt;Prdm5;Nsun7;Mettl13;Prmt3;Nsun4;Prdm4;Armt1;Trmt11;Nsun6;Trmo;Bcdin3d;Mettl5;Mettl4;Mettl15;Ehmt1;Trmt1l;Nsun5;B630005N14Rik;Rrp8;Prmt9;Nsun3;Ece2;Trmt10a;Nop2;…	9	Tfb2m;Mettl21a;Hemk1;Mettl10;Mettl23;Smyd2;6430573F11Rik;Mettl20;Prdm14
GO:0034931	brown	1-hydroxypyrene methyltransferase activity	MF	0.118421	76	2.17295	Tfb2m;Mettl21a;Hemk1;Mettl10;Mettl23;Smyd2;6430573F11Rik;Mettl20;Prdm14;Prdm1;Fbl;Emg1;Trmt2a;Prmt5;Mettl17;Trmt10c;Mettl2;Ftsj3;Setd6;Wbscr22;Dimt1;Mettl6;Rnmtl1;Mettl16;Alkbh8;Setd8;Ftsj2;Eef1akmt1;Comtd1;Ndufaf5;Trmt10b;Mettl18;Eef2kmt;Prdm5;Nsun7;Mettl13;Prmt3;Nsun4;Prdm4;Armt1;Trmt11;Nsun6;Trmo;Bcdin3d;Mettl5;Mettl4;Mettl15;Ehmt1;Trmt1l;Nsun5;B630005N14Rik;Rrp8;Prmt9;Nsun3;Ece2;Trmt10a;Nop2;…	9	Tfb2m;Mettl21a;Hemk1;Mettl10;Mettl23;Smyd2;6430573F11Rik;Mettl20;Prdm14
GO:0034933	brown	1-hydroxy-6-methoxypyrene methyltransferase activity	MF	0.118421	76	2.17295	Tfb2m;Mettl21a;Hemk1;Mettl10;Mettl23;Smyd2;6430573F11Rik;Mettl20;Prdm14;Prdm1;Fbl;Emg1;Trmt2a;Prmt5;Mettl17;Trmt10c;Mettl2;Ftsj3;Setd6;Wbscr22;Dimt1;Mettl6;Rnmtl1;Mettl16;Alkbh8;Setd8;Ftsj2;Eef1akmt1;Comtd1;Ndufaf5;Trmt10b;Mettl18;Eef2kmt;Prdm5;Nsun7;Mettl13;Prmt3;Nsun4;Prdm4;Armt1;Trmt11;Nsun6;Trmo;Bcdin3d;Mettl5;Mettl4;Mettl15;Ehmt1;Trmt1l;Nsun5;B630005N14Rik;Rrp8;Prmt9;Nsun3;Ece2;Trmt10a;Nop2;…	9	Tfb2m;Mettl21a;Hemk1;Mettl10;Mettl23;Smyd2;6430573F11Rik;Mettl20;Prdm14
GO:0043770	brown	demethylmenaquinone methyltransferase activity	MF	0.118421	76	2.17295	Tfb2m;Mettl21a;Hemk1;Mettl10;Mettl23;Smyd2;6430573F11Rik;Mettl20;Prdm14;Prdm1;Fbl;Emg1;Trmt2a;Prmt5;Mettl17;Trmt10c;Mettl2;Ftsj3;Setd6;Wbscr22;Dimt1;Mettl6;Rnmtl1;Mettl16;Alkbh8;Setd8;Ftsj2;Eef1akmt1;Comtd1;Ndufaf5;Trmt10b;Mettl18;Eef2kmt;Prdm5;Nsun7;Mettl13;Prmt3;Nsun4;Prdm4;Armt1;Trmt11;Nsun6;Trmo;Bcdin3d;Mettl5;Mettl4;Mettl15;Ehmt1;Trmt1l;Nsun5;B630005N14Rik;Rrp8;Prmt9;Nsun3;Ece2;Trmt10a;Nop2;…	9	Tfb2m;Mettl21a;Hemk1;Mettl10;Mettl23;Smyd2;6430573F11Rik;Mettl20;Prdm14
GO:0043776	brown	cobalt-precorrin-6B C5-methyltransferase activity	MF	0.118421	76	2.17295	Tfb2m;Mettl21a;Hemk1;Mettl10;Mettl23;Smyd2;6430573F11Rik;Mettl20;Prdm14;Prdm1;Fbl;Emg1;Trmt2a;Prmt5;Mettl17;Trmt10c;Mettl2;Ftsj3;Setd6;Wbscr22;Dimt1;Mettl6;Rnmtl1;Mettl16;Alkbh8;Setd8;Ftsj2;Eef1akmt1;Comtd1;Ndufaf5;Trmt10b;Mettl18;Eef2kmt;Prdm5;Nsun7;Mettl13;Prmt3;Nsun4;Prdm4;Armt1;Trmt11;Nsun6;Trmo;Bcdin3d;Mettl5;Mettl4;Mettl15;Ehmt1;Trmt1l;Nsun5;B630005N14Rik;Rrp8;Prmt9;Nsun3;Ece2;Trmt10a;Nop2;…	9	Tfb2m;Mettl21a;Hemk1;Mettl10;Mettl23;Smyd2;6430573F11Rik;Mettl20;Prdm14
GO:0043777	brown	cobalt-precorrin-7 C15-methyltransferase activity	MF	0.118421	76	2.17295	Tfb2m;Mettl21a;Hemk1;Mettl10;Mettl23;Smyd2;6430573F11Rik;Mettl20;Prdm14;Prdm1;Fbl;Emg1;Trmt2a;Prmt5;Mettl17;Trmt10c;Mettl2;Ftsj3;Setd6;Wbscr22;Dimt1;Mettl6;Rnmtl1;Mettl16;Alkbh8;Setd8;Ftsj2;Eef1akmt1;Comtd1;Ndufaf5;Trmt10b;Mettl18;Eef2kmt;Prdm5;Nsun7;Mettl13;Prmt3;Nsun4;Prdm4;Armt1;Trmt11;Nsun6;Trmo;Bcdin3d;Mettl5;Mettl4;Mettl15;Ehmt1;Trmt1l;Nsun5;B630005N14Rik;Rrp8;Prmt9;Nsun3;Ece2;Trmt10a;Nop2;…	9	Tfb2m;Mettl21a;Hemk1;Mettl10;Mettl23;Smyd2;6430573F11Rik;Mettl20;Prdm14
GO:0043780	brown	cobalt-precorrin-5B C1-methyltransferase activity	MF	0.118421	76	2.17295	Tfb2m;Mettl21a;Hemk1;Mettl10;Mettl23;Smyd2;6430573F11Rik;Mettl20;Prdm14;Prdm1;Fbl;Emg1;Trmt2a;Prmt5;Mettl17;Trmt10c;Mettl2;Ftsj3;Setd6;Wbscr22;Dimt1;Mettl6;Rnmtl1;Mettl16;Alkbh8;Setd8;Ftsj2;Eef1akmt1;Comtd1;Ndufaf5;Trmt10b;Mettl18;Eef2kmt;Prdm5;Nsun7;Mettl13;Prmt3;Nsun4;Prdm4;Armt1;Trmt11;Nsun6;Trmo;Bcdin3d;Mettl5;Mettl4;Mettl15;Ehmt1;Trmt1l;Nsun5;B630005N14Rik;Rrp8;Prmt9;Nsun3;Ece2;Trmt10a;Nop2;…	9	Tfb2m;Mettl21a;Hemk1;Mettl10;Mettl23;Smyd2;6430573F11Rik;Mettl20;Prdm14
GO:0043782	brown	cobalt-precorrin-3 C17-methyltransferase activity	MF	0.118421	76	2.17295	Tfb2m;Mettl21a;Hemk1;Mettl10;Mettl23;Smyd2;6430573F11Rik;Mettl20;Prdm14;Prdm1;Fbl;Emg1;Trmt2a;Prmt5;Mettl17;Trmt10c;Mettl2;Ftsj3;Setd6;Wbscr22;Dimt1;Mettl6;Rnmtl1;Mettl16;Alkbh8;Setd8;Ftsj2;Eef1akmt1;Comtd1;Ndufaf5;Trmt10b;Mettl18;Eef2kmt;Prdm5;Nsun7;Mettl13;Prmt3;Nsun4;Prdm4;Armt1;Trmt11;Nsun6;Trmo;Bcdin3d;Mettl5;Mettl4;Mettl15;Ehmt1;Trmt1l;Nsun5;B630005N14Rik;Rrp8;Prmt9;Nsun3;Ece2;Trmt10a;Nop2;…	9	Tfb2m;Mettl21a;Hemk1;Mettl10;Mettl23;Smyd2;6430573F11Rik;Mettl20;Prdm14
GO:0043791	brown	dimethylamine methyltransferase activity	MF	0.118421	76	2.17295	Tfb2m;Mettl21a;Hemk1;Mettl10;Mettl23;Smyd2;6430573F11Rik;Mettl20;Prdm14;Prdm1;Fbl;Emg1;Trmt2a;Prmt5;Mettl17;Trmt10c;Mettl2;Ftsj3;Setd6;Wbscr22;Dimt1;Mettl6;Rnmtl1;Mettl16;Alkbh8;Setd8;Ftsj2;Eef1akmt1;Comtd1;Ndufaf5;Trmt10b;Mettl18;Eef2kmt;Prdm5;Nsun7;Mettl13;Prmt3;Nsun4;Prdm4;Armt1;Trmt11;Nsun6;Trmo;Bcdin3d;Mettl5;Mettl4;Mettl15;Ehmt1;Trmt1l;Nsun5;B630005N14Rik;Rrp8;Prmt9;Nsun3;Ece2;Trmt10a;Nop2;…	9	Tfb2m;Mettl21a;Hemk1;Mettl10;Mettl23;Smyd2;6430573F11Rik;Mettl20;Prdm14
GO:0043803	brown	hydroxyneurosporene-O-methyltransferase activity	MF	0.118421	76	2.17295	Tfb2m;Mettl21a;Hemk1;Mettl10;Mettl23;Smyd2;6430573F11Rik;Mettl20;Prdm14;Prdm1;Fbl;Emg1;Trmt2a;Prmt5;Mettl17;Trmt10c;Mettl2;Ftsj3;Setd6;Wbscr22;Dimt1;Mettl6;Rnmtl1;Mettl16;Alkbh8;Setd8;Ftsj2;Eef1akmt1;Comtd1;Ndufaf5;Trmt10b;Mettl18;Eef2kmt;Prdm5;Nsun7;Mettl13;Prmt3;Nsun4;Prdm4;Armt1;Trmt11;Nsun6;Trmo;Bcdin3d;Mettl5;Mettl4;Mettl15;Ehmt1;Trmt1l;Nsun5;B630005N14Rik;Rrp8;Prmt9;Nsun3;Ece2;Trmt10a;Nop2;…	9	Tfb2m;Mettl21a;Hemk1;Mettl10;Mettl23;Smyd2;6430573F11Rik;Mettl20;Prdm14
GO:0043827	brown	tRNA (adenine-57, 58-N(1)-) methyltransferase activity	MF	0.118421	76	2.17295	Tfb2m;Mettl21a;Hemk1;Mettl10;Mettl23;Smyd2;6430573F11Rik;Mettl20;Prdm14;Prdm1;Fbl;Emg1;Trmt2a;Prmt5;Mettl17;Trmt10c;Mettl2;Ftsj3;Setd6;Wbscr22;Dimt1;Mettl6;Rnmtl1;Mettl16;Alkbh8;Setd8;Ftsj2;Eef1akmt1;Comtd1;Ndufaf5;Trmt10b;Mettl18;Eef2kmt;Prdm5;Nsun7;Mettl13;Prmt3;Nsun4;Prdm4;Armt1;Trmt11;Nsun6;Trmo;Bcdin3d;Mettl5;Mettl4;Mettl15;Ehmt1;Trmt1l;Nsun5;B630005N14Rik;Rrp8;Prmt9;Nsun3;Ece2;Trmt10a;Nop2;…	9	Tfb2m;Mettl21a;Hemk1;Mettl10;Mettl23;Smyd2;6430573F11Rik;Mettl20;Prdm14
GO:0043833	brown	methylamine-specific methylcobalamin:coenzyme M methyltransferase activity	MF	0.118421	76	2.17295	Tfb2m;Mettl21a;Hemk1;Mettl10;Mettl23;Smyd2;6430573F11Rik;Mettl20;Prdm14;Prdm1;Fbl;Emg1;Trmt2a;Prmt5;Mettl17;Trmt10c;Mettl2;Ftsj3;Setd6;Wbscr22;Dimt1;Mettl6;Rnmtl1;Mettl16;Alkbh8;Setd8;Ftsj2;Eef1akmt1;Comtd1;Ndufaf5;Trmt10b;Mettl18;Eef2kmt;Prdm5;Nsun7;Mettl13;Prmt3;Nsun4;Prdm4;Armt1;Trmt11;Nsun6;Trmo;Bcdin3d;Mettl5;Mettl4;Mettl15;Ehmt1;Trmt1l;Nsun5;B630005N14Rik;Rrp8;Prmt9;Nsun3;Ece2;Trmt10a;Nop2;…	9	Tfb2m;Mettl21a;Hemk1;Mettl10;Mettl23;Smyd2;6430573F11Rik;Mettl20;Prdm14
GO:0043834	brown	trimethylamine methyltransferase activity	MF	0.118421	76	2.17295	Tfb2m;Mettl21a;Hemk1;Mettl10;Mettl23;Smyd2;6430573F11Rik;Mettl20;Prdm14;Prdm1;Fbl;Emg1;Trmt2a;Prmt5;Mettl17;Trmt10c;Mettl2;Ftsj3;Setd6;Wbscr22;Dimt1;Mettl6;Rnmtl1;Mettl16;Alkbh8;Setd8;Ftsj2;Eef1akmt1;Comtd1;Ndufaf5;Trmt10b;Mettl18;Eef2kmt;Prdm5;Nsun7;Mettl13;Prmt3;Nsun4;Prdm4;Armt1;Trmt11;Nsun6;Trmo;Bcdin3d;Mettl5;Mettl4;Mettl15;Ehmt1;Trmt1l;Nsun5;B630005N14Rik;Rrp8;Prmt9;Nsun3;Ece2;Trmt10a;Nop2;…	9	Tfb2m;Mettl21a;Hemk1;Mettl10;Mettl23;Smyd2;6430573F11Rik;Mettl20;Prdm14
GO:0043851	brown	methanol-specific methylcobalamin:coenzyme M methyltransferase activity	MF	0.118421	76	2.17295	Tfb2m;Mettl21a;Hemk1;Mettl10;Mettl23;Smyd2;6430573F11Rik;Mettl20;Prdm14;Prdm1;Fbl;Emg1;Trmt2a;Prmt5;Mettl17;Trmt10c;Mettl2;Ftsj3;Setd6;Wbscr22;Dimt1;Mettl6;Rnmtl1;Mettl16;Alkbh8;Setd8;Ftsj2;Eef1akmt1;Comtd1;Ndufaf5;Trmt10b;Mettl18;Eef2kmt;Prdm5;Nsun7;Mettl13;Prmt3;Nsun4;Prdm4;Armt1;Trmt11;Nsun6;Trmo;Bcdin3d;Mettl5;Mettl4;Mettl15;Ehmt1;Trmt1l;Nsun5;B630005N14Rik;Rrp8;Prmt9;Nsun3;Ece2;Trmt10a;Nop2;…	9	Tfb2m;Mettl21a;Hemk1;Mettl10;Mettl23;Smyd2;6430573F11Rik;Mettl20;Prdm14
GO:0043852	brown	monomethylamine methyltransferase activity	MF	0.118421	76	2.17295	Tfb2m;Mettl21a;Hemk1;Mettl10;Mettl23;Smyd2;6430573F11Rik;Mettl20;Prdm14;Prdm1;Fbl;Emg1;Trmt2a;Prmt5;Mettl17;Trmt10c;Mettl2;Ftsj3;Setd6;Wbscr22;Dimt1;Mettl6;Rnmtl1;Mettl16;Alkbh8;Setd8;Ftsj2;Eef1akmt1;Comtd1;Ndufaf5;Trmt10b;Mettl18;Eef2kmt;Prdm5;Nsun7;Mettl13;Prmt3;Nsun4;Prdm4;Armt1;Trmt11;Nsun6;Trmo;Bcdin3d;Mettl5;Mettl4;Mettl15;Ehmt1;Trmt1l;Nsun5;B630005N14Rik;Rrp8;Prmt9;Nsun3;Ece2;Trmt10a;Nop2;…	9	Tfb2m;Mettl21a;Hemk1;Mettl10;Mettl23;Smyd2;6430573F11Rik;Mettl20;Prdm14
GO:0051994	brown	P-methyltransferase activity	MF	0.118421	76	2.17295	Tfb2m;Mettl21a;Hemk1;Mettl10;Mettl23;Smyd2;6430573F11Rik;Mettl20;Prdm14;Prdm1;Fbl;Emg1;Trmt2a;Prmt5;Mettl17;Trmt10c;Mettl2;Ftsj3;Setd6;Wbscr22;Dimt1;Mettl6;Rnmtl1;Mettl16;Alkbh8;Setd8;Ftsj2;Eef1akmt1;Comtd1;Ndufaf5;Trmt10b;Mettl18;Eef2kmt;Prdm5;Nsun7;Mettl13;Prmt3;Nsun4;Prdm4;Armt1;Trmt11;Nsun6;Trmo;Bcdin3d;Mettl5;Mettl4;Mettl15;Ehmt1;Trmt1l;Nsun5;B630005N14Rik;Rrp8;Prmt9;Nsun3;Ece2;Trmt10a;Nop2;…	9	Tfb2m;Mettl21a;Hemk1;Mettl10;Mettl23;Smyd2;6430573F11Rik;Mettl20;Prdm14
GO:0051995	brown	Se-methyltransferase activity	MF	0.118421	76	2.17295	Tfb2m;Mettl21a;Hemk1;Mettl10;Mettl23;Smyd2;6430573F11Rik;Mettl20;Prdm14;Prdm1;Fbl;Emg1;Trmt2a;Prmt5;Mettl17;Trmt10c;Mettl2;Ftsj3;Setd6;Wbscr22;Dimt1;Mettl6;Rnmtl1;Mettl16;Alkbh8;Setd8;Ftsj2;Eef1akmt1;Comtd1;Ndufaf5;Trmt10b;Mettl18;Eef2kmt;Prdm5;Nsun7;Mettl13;Prmt3;Nsun4;Prdm4;Armt1;Trmt11;Nsun6;Trmo;Bcdin3d;Mettl5;Mettl4;Mettl15;Ehmt1;Trmt1l;Nsun5;B630005N14Rik;Rrp8;Prmt9;Nsun3;Ece2;Trmt10a;Nop2;…	9	Tfb2m;Mettl21a;Hemk1;Mettl10;Mettl23;Smyd2;6430573F11Rik;Mettl20;Prdm14
GO:0052624	brown	2-phytyl-1,4-naphthoquinone methyltransferase activity	MF	0.118421	76	2.17295	Tfb2m;Mettl21a;Hemk1;Mettl10;Mettl23;Smyd2;6430573F11Rik;Mettl20;Prdm14;Prdm1;Fbl;Emg1;Trmt2a;Prmt5;Mettl17;Trmt10c;Mettl2;Ftsj3;Setd6;Wbscr22;Dimt1;Mettl6;Rnmtl1;Mettl16;Alkbh8;Setd8;Ftsj2;Eef1akmt1;Comtd1;Ndufaf5;Trmt10b;Mettl18;Eef2kmt;Prdm5;Nsun7;Mettl13;Prmt3;Nsun4;Prdm4;Armt1;Trmt11;Nsun6;Trmo;Bcdin3d;Mettl5;Mettl4;Mettl15;Ehmt1;Trmt1l;Nsun5;B630005N14Rik;Rrp8;Prmt9;Nsun3;Ece2;Trmt10a;Nop2;…	9	Tfb2m;Mettl21a;Hemk1;Mettl10;Mettl23;Smyd2;6430573F11Rik;Mettl20;Prdm14
GO:0052665	brown	tRNA (uracil-2'-O-)-methyltransferase activity	MF	0.118421	76	2.17295	Tfb2m;Mettl21a;Hemk1;Mettl10;Mettl23;Smyd2;6430573F11Rik;Mettl20;Prdm14;Prdm1;Fbl;Emg1;Trmt2a;Prmt5;Mettl17;Trmt10c;Mettl2;Ftsj3;Setd6;Wbscr22;Dimt1;Mettl6;Rnmtl1;Mettl16;Alkbh8;Setd8;Ftsj2;Eef1akmt1;Comtd1;Ndufaf5;Trmt10b;Mettl18;Eef2kmt;Prdm5;Nsun7;Mettl13;Prmt3;Nsun4;Prdm4;Armt1;Trmt11;Nsun6;Trmo;Bcdin3d;Mettl5;Mettl4;Mettl15;Ehmt1;Trmt1l;Nsun5;B630005N14Rik;Rrp8;Prmt9;Nsun3;Ece2;Trmt10a;Nop2;…	9	Tfb2m;Mettl21a;Hemk1;Mettl10;Mettl23;Smyd2;6430573F11Rik;Mettl20;Prdm14
GO:0052666	brown	tRNA (cytosine-2'-O-)-methyltransferase activity	MF	0.118421	76	2.17295	Tfb2m;Mettl21a;Hemk1;Mettl10;Mettl23;Smyd2;6430573F11Rik;Mettl20;Prdm14;Prdm1;Fbl;Emg1;Trmt2a;Prmt5;Mettl17;Trmt10c;Mettl2;Ftsj3;Setd6;Wbscr22;Dimt1;Mettl6;Rnmtl1;Mettl16;Alkbh8;Setd8;Ftsj2;Eef1akmt1;Comtd1;Ndufaf5;Trmt10b;Mettl18;Eef2kmt;Prdm5;Nsun7;Mettl13;Prmt3;Nsun4;Prdm4;Armt1;Trmt11;Nsun6;Trmo;Bcdin3d;Mettl5;Mettl4;Mettl15;Ehmt1;Trmt1l;Nsun5;B630005N14Rik;Rrp8;Prmt9;Nsun3;Ece2;Trmt10a;Nop2;…	9	Tfb2m;Mettl21a;Hemk1;Mettl10;Mettl23;Smyd2;6430573F11Rik;Mettl20;Prdm14
GO:0052667	brown	phosphomethylethanolamine N-methyltransferase activity	MF	0.118421	76	2.17295	Tfb2m;Mettl21a;Hemk1;Mettl10;Mettl23;Smyd2;6430573F11Rik;Mettl20;Prdm14;Prdm1;Fbl;Emg1;Trmt2a;Prmt5;Mettl17;Trmt10c;Mettl2;Ftsj3;Setd6;Wbscr22;Dimt1;Mettl6;Rnmtl1;Mettl16;Alkbh8;Setd8;Ftsj2;Eef1akmt1;Comtd1;Ndufaf5;Trmt10b;Mettl18;Eef2kmt;Prdm5;Nsun7;Mettl13;Prmt3;Nsun4;Prdm4;Armt1;Trmt11;Nsun6;Trmo;Bcdin3d;Mettl5;Mettl4;Mettl15;Ehmt1;Trmt1l;Nsun5;B630005N14Rik;Rrp8;Prmt9;Nsun3;Ece2;Trmt10a;Nop2;…	9	Tfb2m;Mettl21a;Hemk1;Mettl10;Mettl23;Smyd2;6430573F11Rik;Mettl20;Prdm14
GO:0052735	brown	tRNA (cytosine-3-)-methyltransferase activity	MF	0.118421	76	2.17295	Tfb2m;Mettl21a;Hemk1;Mettl10;Mettl23;Smyd2;6430573F11Rik;Mettl20;Prdm14;Prdm1;Fbl;Emg1;Trmt2a;Prmt5;Mettl17;Trmt10c;Mettl2;Ftsj3;Setd6;Wbscr22;Dimt1;Mettl6;Rnmtl1;Mettl16;Alkbh8;Setd8;Ftsj2;Eef1akmt1;Comtd1;Ndufaf5;Trmt10b;Mettl18;Eef2kmt;Prdm5;Nsun7;Mettl13;Prmt3;Nsun4;Prdm4;Armt1;Trmt11;Nsun6;Trmo;Bcdin3d;Mettl5;Mettl4;Mettl15;Ehmt1;Trmt1l;Nsun5;B630005N14Rik;Rrp8;Prmt9;Nsun3;Ece2;Trmt10a;Nop2;…	9	Tfb2m;Mettl21a;Hemk1;Mettl10;Mettl23;Smyd2;6430573F11Rik;Mettl20;Prdm14
GO:0070677	brown	rRNA (cytosine-2'-O-)-methyltransferase activity	MF	0.118421	76	2.17295	Tfb2m;Mettl21a;Hemk1;Mettl10;Mettl23;Smyd2;6430573F11Rik;Mettl20;Prdm14;Prdm1;Fbl;Emg1;Trmt2a;Prmt5;Mettl17;Trmt10c;Mettl2;Ftsj3;Setd6;Wbscr22;Dimt1;Mettl6;Rnmtl1;Mettl16;Alkbh8;Setd8;Ftsj2;Eef1akmt1;Comtd1;Ndufaf5;Trmt10b;Mettl18;Eef2kmt;Prdm5;Nsun7;Mettl13;Prmt3;Nsun4;Prdm4;Armt1;Trmt11;Nsun6;Trmo;Bcdin3d;Mettl5;Mettl4;Mettl15;Ehmt1;Trmt1l;Nsun5;B630005N14Rik;Rrp8;Prmt9;Nsun3;Ece2;Trmt10a;Nop2;…	9	Tfb2m;Mettl21a;Hemk1;Mettl10;Mettl23;Smyd2;6430573F11Rik;Mettl20;Prdm14
GO:0071424	brown	rRNA (cytosine-N4-)-methyltransferase activity	MF	0.118421	76	2.17295	Tfb2m;Mettl21a;Hemk1;Mettl10;Mettl23;Smyd2;6430573F11Rik;Mettl20;Prdm14;Prdm1;Fbl;Emg1;Trmt2a;Prmt5;Mettl17;Trmt10c;Mettl2;Ftsj3;Setd6;Wbscr22;Dimt1;Mettl6;Rnmtl1;Mettl16;Alkbh8;Setd8;Ftsj2;Eef1akmt1;Comtd1;Ndufaf5;Trmt10b;Mettl18;Eef2kmt;Prdm5;Nsun7;Mettl13;Prmt3;Nsun4;Prdm4;Armt1;Trmt11;Nsun6;Trmo;Bcdin3d;Mettl5;Mettl4;Mettl15;Ehmt1;Trmt1l;Nsun5;B630005N14Rik;Rrp8;Prmt9;Nsun3;Ece2;Trmt10a;Nop2;…	9	Tfb2m;Mettl21a;Hemk1;Mettl10;Mettl23;Smyd2;6430573F11Rik;Mettl20;Prdm14
GO:0080012	brown	trihydroxyferuloyl spermidine O-methyltransferase activity	MF	0.118421	76	2.17295	Tfb2m;Mettl21a;Hemk1;Mettl10;Mettl23;Smyd2;6430573F11Rik;Mettl20;Prdm14;Prdm1;Fbl;Emg1;Trmt2a;Prmt5;Mettl17;Trmt10c;Mettl2;Ftsj3;Setd6;Wbscr22;Dimt1;Mettl6;Rnmtl1;Mettl16;Alkbh8;Setd8;Ftsj2;Eef1akmt1;Comtd1;Ndufaf5;Trmt10b;Mettl18;Eef2kmt;Prdm5;Nsun7;Mettl13;Prmt3;Nsun4;Prdm4;Armt1;Trmt11;Nsun6;Trmo;Bcdin3d;Mettl5;Mettl4;Mettl15;Ehmt1;Trmt1l;Nsun5;B630005N14Rik;Rrp8;Prmt9;Nsun3;Ece2;Trmt10a;Nop2;…	9	Tfb2m;Mettl21a;Hemk1;Mettl10;Mettl23;Smyd2;6430573F11Rik;Mettl20;Prdm14
GO:2000181	brown	negative regulation of blood vessel morphogenesis	BP	0.118421	76	2.17295	Cd59a;Col4a3;Itgb1bp1;Tek;Foxo4;Ecscr;Mmrn2;Adgrb3;Stard13;Adamts1;Adrb2;Angpt2;Angpt4;Agt;Apoh;Rhoa;Cd36;Cxcr3;Ccr2;Col4a2;Crhr2;Cx3cr1;Dcn;Epha2;Fasl;Gtf2i;Hdac5;Hhex;Hoxa5;Cxcl10;Klf4;Lif;Foxc1;Nf1;Ngfr;Notch1;Pde3b;Serpine1;Plg;Pml;Ptger4;Ptn;Ptprm;Rock1;Rock2;Ccl2;Serpinf1;Sema3e;Sema4a;Sparc;Stat1;Tcf4;Thbs1;Thbs2;Tie1;Wnt4;Xdh;Map2k5;Synj2bp;Amot;Dll4;Pdcd10;Pf4;Rgcc;Dab2ip;Krit1;Adgrb1;St…	9	Cd59a;Col4a3;Itgb1bp1;Tek;Foxo4;Ecscr;Mmrn2;Adgrb3;Stard13
GO:0032387	brown	negative regulation of intracellular transport	BP	0.105691	123	2.16954	Casq2;Cdk5;Itgb1bp1;Pkia;Ppm1a;Inpp5k;Tacc3;Snx12;Erlec1;Derl3;Svip;Os9;Lyplal1;Angpt1;Akap1;Slc25a5;Apod;Axin2;Bard1;Bcl2;Cd36;Cd84;Cnih2;Creb3;Cryab;Csk;Emd;Dmtn;Faf1;Fkbp1b;Fzd1;Gas6;Gdi1;Gsto1;Hdac3;Foxf1;Hmox1;Hnf4a;Hrc;Ier3;Mdfic;Gbp4;Map1b;Mapt;Fam89b;Nf1;Nfkbia;Nfkbib;Nov;Ntsr1;Prkce;Pkd1;Pkd2;Pkig;Lypla1;Ppm1b;Ppp2ca;Rab23;Rangap1;Sar1a;Snai2;Sox4;Tgfb1;Tgfb2;Thra;Trip6;Txn1;Ube2g2;Apc2;…	13	Casq2;Cdk5;Itgb1bp1;Pkia;Ppm1a;Inpp5k;Tacc3;Snx12;Erlec1;Derl3;Svip;Os9;Lyplal1
GO:0000323	brown	lytic vacuole	CC	0.084788	401	2.16015	Aga;Glb1;Cd34;Cxcr4;Ctsd;Egf;Gba;Mpz;Nbr1;P2rx4;Vamp8;Rnf13;Calcrl;Tmem59;Rab9;Dnase2b;Dram2;Mmd;Chid1;Lamtor5;Slc44a2;Fuca1;Prcp;Tmem192;3110043O21Rik;Stard3nl;Ctns;Vps41;Ccz1;Slc17a5;March3;Pon2;Atraid;Znrf2;Abca2;Ace;Acp2;Acp5;Ada;Adam8;Gla;Akr1b3;Ank3;Ankfy1;Anxa11;Anxa6;Prdx6;Ap3b1;Ap3d1;Apoe;Arsb;Arsa;Asah1;Rab27a;Ass1;Atp6v1a;Atp6v1b2;Atp6v0d1;Atp6v1e1;Atp6v0c;Bcl10;Btk;Anxa2;Capn1;Capn2;C…	34	Aga;Glb1;Cd34;Cxcr4;Ctsd;Egf;Gba;Mpz;Nbr1;P2rx4;Vamp8;Rnf13;Calcrl;Tmem59;Rab9;Dnase2b;Dram2;Mmd;Chid1;Lamtor5;Slc44a2;Fuca1;Prcp;Tmem192;3110043O21Rik;Stard3nl;Ctns;Vps41;Ccz1;Slc17a5;March3;Pon2;Atraid;Znrf2
GO:0005764	brown	lysosome	CC	0.084788	401	2.16015	Aga;Glb1;Cd34;Cxcr4;Ctsd;Egf;Gba;Mpz;Nbr1;P2rx4;Vamp8;Rnf13;Calcrl;Tmem59;Rab9;Dnase2b;Dram2;Mmd;Chid1;Lamtor5;Slc44a2;Fuca1;Prcp;Tmem192;3110043O21Rik;Stard3nl;Ctns;Vps41;Ccz1;Slc17a5;March3;Pon2;Atraid;Znrf2;Abca2;Ace;Acp2;Acp5;Ada;Adam8;Gla;Akr1b3;Ank3;Ankfy1;Anxa11;Anxa6;Prdx6;Ap3b1;Ap3d1;Apoe;Arsb;Arsa;Asah1;Rab27a;Ass1;Atp6v1a;Atp6v1b2;Atp6v0d1;Atp6v1e1;Atp6v0c;Bcl10;Btk;Anxa2;Capn1;Capn2;C…	34	Aga;Glb1;Cd34;Cxcr4;Ctsd;Egf;Gba;Mpz;Nbr1;P2rx4;Vamp8;Rnf13;Calcrl;Tmem59;Rab9;Dnase2b;Dram2;Mmd;Chid1;Lamtor5;Slc44a2;Fuca1;Prcp;Tmem192;3110043O21Rik;Stard3nl;Ctns;Vps41;Ccz1;Slc17a5;March3;Pon2;Atraid;Znrf2
GO:0016538	brown	cyclin-dependent protein serine/threonine kinase regulator activity	MF	0.147059	34	2.15783	Ccne1;Ccni;Cdkn2c;Kat2b;Fn3k;Casp3;Ccnd1;Ccne2;Ccnk;Ccnt1;Cdkn1a;Cdkn1b;Cdkn1c;Cdkn2a;Cdkn2b;Cdkn2d;Ccnc;Cks1b;Ccnl2;Ccnl1;Cks2;Ccnh;Ccny;Uckl1;Fam58b;Hexim2;Ccnt2;Nol9;Pomk;Fggy;Inca1;Hexim1;Fam20b;Fn3krp	5	Ccne1;Ccni;Cdkn2c;Kat2b;Fn3k
GO:0005507	brown	copper ion binding	MF	0.136364	44	2.15532	Ccs;F8;Heph;P2rx4;S100a13;Snca;Adnp;Ang;Aoc3;Atox1;Atp7a;Atp7b;Cox17;Cp;F5;Gpc1;Il1a;Lox;Loxl1;Loxl3;COX2;Mt1;Commd1;Slc11a2;Pam;Prnp;Sod1;Sod3;Trp53;Tyr;Prnd;Mettl17;Park7;Moxd1;Cutc;Loxl4;Cox11;Hamp;Loxl2;Rnpep;P2rx2;Aoc2;Ahcy;Sco2	6	Ccs;F8;Heph;P2rx4;S100a13;Snca
GO:00306621	brown	coated vesicle membrane	CC	0.136364	44	2.15532	Snap91;Golga5;Copz2;Tmed3;Necap1;Rassf9;Ap1s1;Clta;Copa;Dab2;Epn2;Eps15;Furin;Sec23a;Trf;Vamp3;Sec23b;Copb2;Copg2;Copg1;Uso1;Copz1;Cope;Nrgn;Necap2;Cltc;1190002N15Rik;Sec31a;Copb1;Tbc1d5;Sgip1;Cltb;Sec24a;Scyl1;Cemip;Sec24b;Ldlrap1;Arcn1;Aftph;Synrg;Dennd1a;Ap2s1;Picalm;Sec31b	6	Snap91;Golga5;Copz2;Tmed3;Necap1;Rassf9
GO:0006520	brown	cellular amino acid metabolic process	BP	0.090566	265	2.14944	Bckdha;Bckdhb;Bckdk;Ddc;Dhfr;Gstz1;P4ha2;Tyms;Aadat;Aass;Nit2;Apip;Serinc1;Acad8;Gatm;Ero1lb;Bphl;Asnsd1;Ddo;Nmnat3;Aldh6a1;Pycr1;Thnsl2;Csad;Adssl1;Adss;Apc;Arg1;Arg2;Ass1;Atp7a;Auh;Baat;Bcat1;Bcat2;Cacna1a;Cbs;Cdo1;Cln3;Comt;Dao;Dct;Dnmt1;Dnmt3a;Dnmt3b;Dpep1;Fah;Il4i1;Folr1;Fpgs;Gad1;Gad2;Gamt;Gart;Gata3;Gch1;Gfpt1;Gfpt2;Ggh;Ggt1;Ghr;Gclc;Gclm;Glul;Gls;Glud1;Gnmt;Got1;Got2;Hal;Hars;Hdc;Htt;Hgd;…	24	Bckdha;Bckdhb;Bckdk;Ddc;Dhfr;Gstz1;P4ha2;Tyms;Aadat;Aass;Nit2;Apip;Serinc1;Acad8;Gatm;Ero1lb;Bphl;Asnsd1;Ddo;Nmnat3;Aldh6a1;Pycr1;Thnsl2;Csad
GO:0004809	brown	tRNA (guanine-N2-)-methyltransferase activity	MF	0.116883	77	2.13012	Tfb2m;Mettl21a;Hemk1;Mettl10;Mettl23;Smyd2;6430573F11Rik;Mettl20;Prdm14;Prdm1;Fbl;Emg1;Trmt2a;Prmt5;Mettl17;Trmt10c;Mettl2;Ftsj3;Setd6;Wbscr22;Dimt1;Mettl6;Rnmtl1;Mettl16;Alkbh8;Setd8;Ftsj2;Eef1akmt1;Comtd1;Ndufaf5;Trmt10b;Mettl18;Eef2kmt;Prdm5;Nsun7;Mettl13;Prmt3;Nsun4;Prdm4;Armt1;Trmt11;Nsun6;Trmo;Bcdin3d;Mettl5;Mettl4;Mettl15;Ehmt1;Trmt1l;Nsun5;B630005N14Rik;Rrp8;Prmt9;Nsun3;Ece2;Trmt10a;Nop2;…	9	Tfb2m;Mettl21a;Hemk1;Mettl10;Mettl23;Smyd2;6430573F11Rik;Mettl20;Prdm14
GO:0008169	brown	C-methyltransferase activity	MF	0.116883	77	2.13012	Tfb2m;Mettl21a;Hemk1;Mettl10;Mettl23;Smyd2;6430573F11Rik;Mettl20;Prdm14;Prdm1;Fbl;Emg1;Trmt2a;Prmt5;Mettl17;Trmt10c;Mettl2;Ftsj3;Setd6;Wbscr22;Dimt1;Mettl6;Rnmtl1;Mettl16;Alkbh8;Setd8;Ftsj2;Eef1akmt1;Comtd1;Ndufaf5;Trmt10b;Mettl18;Eef2kmt;Prdm5;Nsun7;Mettl13;Prmt3;Nsun4;Prdm4;Armt1;Trmt11;Nsun6;Trmo;Bcdin3d;Mettl5;Mettl4;Mettl15;Ehmt1;Trmt1l;Nsun5;B630005N14Rik;Rrp8;Prmt9;Nsun3;Ece2;Trmt10a;Nop2;…	9	Tfb2m;Mettl21a;Hemk1;Mettl10;Mettl23;Smyd2;6430573F11Rik;Mettl20;Prdm14
GO:0008425	brown	2-polyprenyl-6-methoxy-1,4-benzoquinone methyltransferase activity	MF	0.116883	77	2.13012	Tfb2m;Mettl21a;Hemk1;Mettl10;Mettl23;Smyd2;6430573F11Rik;Mettl20;Prdm14;Prdm1;Fbl;Emg1;Trmt2a;Prmt5;Mettl17;Trmt10c;Mettl2;Ftsj3;Setd6;Wbscr22;Dimt1;Mettl6;Rnmtl1;Mettl16;Alkbh8;Setd8;Ftsj2;Eef1akmt1;Comtd1;Ndufaf5;Trmt10b;Mettl18;Eef2kmt;Prdm5;Nsun7;Mettl13;Prmt3;Nsun4;Prdm4;Armt1;Trmt11;Nsun6;Trmo;Bcdin3d;Mettl5;Mettl4;Mettl15;Ehmt1;Trmt1l;Nsun5;B630005N14Rik;Rrp8;Prmt9;Nsun3;Ece2;Trmt10a;Nop2;…	9	Tfb2m;Mettl21a;Hemk1;Mettl10;Mettl23;Smyd2;6430573F11Rik;Mettl20;Prdm14
GO:0008649	brown	rRNA methyltransferase activity	MF	0.116883	77	2.13012	Tfb2m;Mettl21a;Hemk1;Mettl10;Mettl23;Smyd2;6430573F11Rik;Mettl20;Prdm14;Prdm1;Fbl;Emg1;Trmt2a;Prmt5;Mettl17;Trmt10c;Mettl2;Ftsj3;Setd6;Wbscr22;Dimt1;Mettl6;Rnmtl1;Mettl16;Alkbh8;Setd8;Ftsj2;Eef1akmt1;Comtd1;Ndufaf5;Trmt10b;Mettl18;Eef2kmt;Prdm5;Nsun7;Mettl13;Prmt3;Nsun4;Prdm4;Armt1;Trmt11;Nsun6;Trmo;Bcdin3d;Mettl5;Mettl4;Mettl15;Ehmt1;Trmt1l;Nsun5;B630005N14Rik;Rrp8;Prmt9;Nsun3;Ece2;Trmt10a;Nop2;…	9	Tfb2m;Mettl21a;Hemk1;Mettl10;Mettl23;Smyd2;6430573F11Rik;Mettl20;Prdm14
GO:0009019	brown	tRNA (guanine-N1-)-methyltransferase activity	MF	0.116883	77	2.13012	Tfb2m;Mettl21a;Hemk1;Mettl10;Mettl23;Smyd2;6430573F11Rik;Mettl20;Prdm14;Prdm1;Fbl;Emg1;Trmt2a;Prmt5;Mettl17;Trmt10c;Mettl2;Ftsj3;Setd6;Wbscr22;Dimt1;Mettl6;Rnmtl1;Mettl16;Alkbh8;Setd8;Ftsj2;Eef1akmt1;Comtd1;Ndufaf5;Trmt10b;Mettl18;Eef2kmt;Prdm5;Nsun7;Mettl13;Prmt3;Nsun4;Prdm4;Armt1;Trmt11;Nsun6;Trmo;Bcdin3d;Mettl5;Trmt5;Mettl4;Mettl15;Ehmt1;Trmt1l;Nsun5;B630005N14Rik;Rrp8;Prmt9;Nsun3;Ece2;Trmt10a…	9	Tfb2m;Mettl21a;Hemk1;Mettl10;Mettl23;Smyd2;6430573F11Rik;Mettl20;Prdm14
GO:0016426	brown	tRNA (adenine) methyltransferase activity	MF	0.116883	77	2.13012	Tfb2m;Mettl21a;Hemk1;Mettl10;Mettl23;Smyd2;6430573F11Rik;Mettl20;Prdm14;Prdm1;Fbl;Emg1;Trmt2a;Prmt5;Mettl17;Trmt10c;Mettl2;Ftsj3;Setd6;Wbscr22;Dimt1;Mettl6;Rnmtl1;Mettl16;Alkbh8;Setd8;Ftsj2;Eef1akmt1;Comtd1;Ndufaf5;Trmt10b;Mettl18;Eef2kmt;Prdm5;Nsun7;Mettl13;Prmt3;Nsun4;Prdm4;Armt1;Trmt11;Nsun6;Trmo;Bcdin3d;Mettl5;Mettl4;Mettl15;Ehmt1;Trmt1l;Nsun5;B630005N14Rik;Rrp8;Prmt9;Nsun3;Ece2;Trmt10a;Nop2;…	9	Tfb2m;Mettl21a;Hemk1;Mettl10;Mettl23;Smyd2;6430573F11Rik;Mettl20;Prdm14
GO:0016427	brown	tRNA (cytosine) methyltransferase activity	MF	0.116883	77	2.13012	Tfb2m;Mettl21a;Hemk1;Mettl10;Mettl23;Smyd2;6430573F11Rik;Mettl20;Prdm14;Prdm1;Fbl;Emg1;Trmt2a;Prmt5;Nsun2;Mettl17;Trmt10c;Mettl2;Ftsj3;Setd6;Wbscr22;Dimt1;Mettl6;Rnmtl1;Mettl16;Alkbh8;Setd8;Ftsj2;Eef1akmt1;Comtd1;Ndufaf5;Trmt10b;Mettl18;Eef2kmt;Prdm5;Nsun7;Mettl13;Prmt3;Nsun4;Prdm4;Armt1;Trmt11;Nsun6;Trmo;Bcdin3d;Mettl5;Mettl4;Mettl15;Ehmt1;Trmt1l;Nsun5;B630005N14Rik;Rrp8;Prmt9;Nsun3;Ece2;Trmt10a…	9	Tfb2m;Mettl21a;Hemk1;Mettl10;Mettl23;Smyd2;6430573F11Rik;Mettl20;Prdm14
GO:0016428	brown	tRNA (cytosine-5-)-methyltransferase activity	MF	0.116883	77	2.13012	Tfb2m;Mettl21a;Hemk1;Mettl10;Mettl23;Smyd2;6430573F11Rik;Mettl20;Prdm14;Prdm1;Fbl;Emg1;Trmt2a;Prmt5;Nsun2;Mettl17;Trmt10c;Mettl2;Ftsj3;Setd6;Wbscr22;Dimt1;Mettl6;Rnmtl1;Mettl16;Alkbh8;Setd8;Ftsj2;Eef1akmt1;Comtd1;Ndufaf5;Trmt10b;Mettl18;Eef2kmt;Prdm5;Nsun7;Mettl13;Prmt3;Nsun4;Prdm4;Armt1;Trmt11;Nsun6;Trmo;Bcdin3d;Mettl5;Mettl4;Mettl15;Ehmt1;Trmt1l;Nsun5;B630005N14Rik;Rrp8;Prmt9;Nsun3;Ece2;Trmt10a…	9	Tfb2m;Mettl21a;Hemk1;Mettl10;Mettl23;Smyd2;6430573F11Rik;Mettl20;Prdm14
GO:0016429	brown	tRNA (adenine-N1-)-methyltransferase activity	MF	0.116883	77	2.13012	Tfb2m;Mettl21a;Hemk1;Mettl10;Mettl23;Smyd2;6430573F11Rik;Mettl20;Prdm14;Prdm1;Fbl;Emg1;Trmt2a;Prmt5;Mettl17;Trmt10c;Mettl2;Ftsj3;Setd6;Wbscr22;Dimt1;Mettl6;Rnmtl1;Mettl16;Alkbh8;Setd8;Ftsj2;Eef1akmt1;Comtd1;Ndufaf5;Trmt10b;Mettl18;Eef2kmt;Prdm5;Nsun7;Mettl13;Prmt3;Nsun4;Prdm4;Armt1;Trmt11;Nsun6;Trmo;Bcdin3d;Mettl5;Mettl4;Mettl15;Ehmt1;Trmt1l;Nsun5;B630005N14Rik;Rrp8;Prmt9;Nsun3;Ece2;Trmt10a;Nop2;…	9	Tfb2m;Mettl21a;Hemk1;Mettl10;Mettl23;Smyd2;6430573F11Rik;Mettl20;Prdm14
GO:0016436	brown	rRNA (uridine) methyltransferase activity	MF	0.116883	77	2.13012	Tfb2m;Mettl21a;Hemk1;Mettl10;Mettl23;Smyd2;6430573F11Rik;Mettl20;Prdm14;Prdm1;Fbl;Emg1;Trmt2a;Prmt5;Mettl17;Trmt10c;Mettl2;Ftsj3;Setd6;Wbscr22;Dimt1;Mettl6;Rnmtl1;Mettl16;Alkbh8;Setd8;Ftsj2;Eef1akmt1;Comtd1;Ndufaf5;Trmt10b;Mettl18;Eef2kmt;Prdm5;Nsun7;Mettl13;Prmt3;Nsun4;Prdm4;Armt1;Trmt11;Nsun6;Trmo;Bcdin3d;Mettl5;Mettl4;Mettl15;Ehmt1;Trmt1l;Nsun5;B630005N14Rik;Rrp8;Prmt9;Nsun3;Ece2;Trmt10a;Nop2;…	9	Tfb2m;Mettl21a;Hemk1;Mettl10;Mettl23;Smyd2;6430573F11Rik;Mettl20;Prdm14
GO:0018423	brown	protein C-terminal leucine carboxyl O-methyltransferase activity	MF	0.116883	77	2.13012	Tfb2m;Mettl21a;Hemk1;Mettl10;Mettl23;Smyd2;6430573F11Rik;Mettl20;Prdm14;Prdm1;Fbl;Emg1;Trmt2a;Prmt5;Lcmt1;Mettl17;Trmt10c;Mettl2;Ftsj3;Setd6;Wbscr22;Dimt1;Mettl6;Rnmtl1;Mettl16;Alkbh8;Setd8;Ftsj2;Eef1akmt1;Comtd1;Ndufaf5;Trmt10b;Mettl18;Eef2kmt;Prdm5;Nsun7;Mettl13;Prmt3;Nsun4;Prdm4;Armt1;Trmt11;Nsun6;Trmo;Bcdin3d;Mettl5;Mettl4;Mettl15;Ehmt1;Trmt1l;Nsun5;B630005N14Rik;Rrp8;Prmt9;Nsun3;Ece2;Trmt10a…	9	Tfb2m;Mettl21a;Hemk1;Mettl10;Mettl23;Smyd2;6430573F11Rik;Mettl20;Prdm14
GO:0030580	brown	quinone cofactor methyltransferase activity	MF	0.116883	77	2.13012	Tfb2m;Mettl21a;Hemk1;Mettl10;Mettl23;Smyd2;6430573F11Rik;Mettl20;Prdm14;Prdm1;Fbl;Emg1;Trmt2a;Prmt5;Mettl17;Trmt10c;Mettl2;Ftsj3;Setd6;Wbscr22;Dimt1;Mettl6;Rnmtl1;Mettl16;Alkbh8;Setd8;Ftsj2;Eef1akmt1;Comtd1;Ndufaf5;Trmt10b;Mettl18;Eef2kmt;Prdm5;Nsun7;Mettl13;Prmt3;Nsun4;Prdm4;Armt1;Trmt11;Nsun6;Trmo;Bcdin3d;Mettl5;Mettl4;Mettl15;Ehmt1;Trmt1l;Nsun5;B630005N14Rik;Rrp8;Prmt9;Nsun3;Ece2;Trmt10a;Nop2;…	9	Tfb2m;Mettl21a;Hemk1;Mettl10;Mettl23;Smyd2;6430573F11Rik;Mettl20;Prdm14
GO:0016300	brown	tRNA (uracil) methyltransferase activity	MF	0.115385	78	2.08793	Tfb2m;Mettl21a;Hemk1;Mettl10;Mettl23;Smyd2;6430573F11Rik;Mettl20;Prdm14;Prdm1;Fbl;Emg1;Trmt2a;Prmt5;Mettl17;Trmt10c;Mettl2;Ftsj3;Setd6;Wbscr22;Dimt1;Mettl6;Rnmtl1;Mettl16;Alkbh8;Setd8;Ftsj2;Eef1akmt1;Comtd1;Ndufaf5;Trmt10b;Mettl18;Eef2kmt;Prdm5;Nsun7;Mettl13;Prmt3;Nsun4;Prdm4;Armt1;Trmt11;Nsun6;Trmo;Bcdin3d;Mettl5;Mettl4;Mettl15;Ehmt1;Trmt44;Trmt1l;Nsun5;B630005N14Rik;Rrp8;Prmt9;Nsun3;Ece2;Trmt10…	9	Tfb2m;Mettl21a;Hemk1;Mettl10;Mettl23;Smyd2;6430573F11Rik;Mettl20;Prdm14
GO:0016790	brown	thiolester hydrolase activity	MF	0.142857	35	2.08427	Hagh;Pnkd;Aldh6a1;Ufsp2;Lyplal1;Baat;Esd;Ces1e;Fasn;Gnpat;Hnf4a;Lypla1;Ppt1;Ptprt;Lypla2;Acot1;Ppt2;Acot9;Park7;Acot10;Acot13;Nudt7;Haghl;Acot7;Ufsp1;Acot12;Them4;Acot8;Acot2;Acot3;Acot4;Acot5;Acot6;Hibch;Acot11	5	Hagh;Pnkd;Aldh6a1;Ufsp2;Lyplal1
GO:00004221	brown	mitophagy	BP	0.0960452	177	2.06168	Bnip3l;Myom1;Nme2;Nthl1;Atg13;Wdr45;Gabarapl1;Map1lc3b;Pink1;Fundc1;Gabra5;Atg9b;Pdk1;Slc17a9;Yipf1;Atg4a;Atg14;Adrb2;Anxa5;Atg5;Atp1b1;Atpif1;Tspo;Calca;Car7;Cdc37;Cdkn2a;Cox8a;Hapln1;Csnk2a2;Ctsk;Cttn;Eif2s1;Stom;Fancc;Fzd5;Slc37a4;Bloc1s1;Kat2a;Gdf5;Hc;Hdac6;Hif1a;Hk2;Kcnk3;Krt15;Cd93;Mdh1;Mstn;Map1a;Myh11;Sqstm1;Pik3ca;Ppy;Prkg1;Rpl28;Sfrp4;Slc1a3;Snrpb;Snrpd1;Srebf1;Srebf2;Stat2;Nr2c2;Trp53;…	17	Bnip3l;Myom1;Nme2;Nthl1;Atg13;Wdr45;Gabarapl1;Map1lc3b;Pink1;Fundc1;Gabra5;Atg9b;Pdk1;Slc17a9;Yipf1;Atg4a;Atg14
GO:00617261	brown	mitochondrion disassembly	BP	0.0960452	177	2.06168	Bnip3l;Myom1;Nme2;Nthl1;Atg13;Wdr45;Gabarapl1;Map1lc3b;Pink1;Fundc1;Gabra5;Atg9b;Pdk1;Slc17a9;Yipf1;Atg4a;Atg14;Adrb2;Anxa5;Atg5;Atp1b1;Atpif1;Tspo;Calca;Car7;Cdc37;Cdkn2a;Cox8a;Hapln1;Csnk2a2;Ctsk;Cttn;Eif2s1;Stom;Fancc;Fzd5;Slc37a4;Bloc1s1;Kat2a;Gdf5;Hc;Hdac6;Hif1a;Hk2;Kcnk3;Krt15;Cd93;Mdh1;Mstn;Map1a;Myh11;Sqstm1;Pik3ca;Ppy;Prkg1;Rpl28;Sfrp4;Slc1a3;Snrpb;Snrpd1;Srebf1;Srebf2;Stat2;Nr2c2;Trp53;…	17	Bnip3l;Myom1;Nme2;Nthl1;Atg13;Wdr45;Gabarapl1;Map1lc3b;Pink1;Fundc1;Gabra5;Atg9b;Pdk1;Slc17a9;Yipf1;Atg4a;Atg14
GO:0003880	brown	protein C-terminal carboxyl O-methyltransferase activity	MF	0.113924	79	2.04635	Tfb2m;Mettl21a;Hemk1;Mettl10;Mettl23;Smyd2;6430573F11Rik;Mettl20;Prdm14;Prdm1;Fbl;Emg1;Trmt2a;Prmt5;Lcmt1;Mettl17;Trmt10c;Mettl2;Ftsj3;Icmt;Setd6;Wbscr22;Dimt1;Mettl6;Rnmtl1;Mettl16;Alkbh8;Setd8;Ftsj2;Eef1akmt1;Comtd1;Ndufaf5;Trmt10b;Mettl18;Eef2kmt;Prdm5;Nsun7;Mettl13;Prmt3;Nsun4;Prdm4;Armt1;Trmt11;Nsun6;Trmo;Bcdin3d;Mettl5;Mettl4;Mettl15;Ehmt1;Trmt1l;Nsun5;B630005N14Rik;Rrp8;Prmt9;Nsun3;Ece2;Tr…	9	Tfb2m;Mettl21a;Hemk1;Mettl10;Mettl23;Smyd2;6430573F11Rik;Mettl20;Prdm14
GO:0009008	brown	DNA-methyltransferase activity	MF	0.113924	79	2.04635	Tfb2m;Mettl21a;Hemk1;Mettl10;Mettl23;Smyd2;6430573F11Rik;Mettl20;Prdm14;Prdm1;Dnmt1;Dnmt3a;Dnmt3b;Fbl;Emg1;Trmt2a;Prmt5;Mettl17;Trmt10c;Mettl2;Ftsj3;Setd6;Wbscr22;Dimt1;Mettl6;Rnmtl1;Mettl16;Alkbh8;Setd8;Ftsj2;Eef1akmt1;Comtd1;Ndufaf5;Trmt10b;Mettl18;Eef2kmt;Prdm5;Nsun7;Mettl13;Prmt3;Nsun4;Prdm4;Armt1;Trmt11;Nsun6;Trmo;Bcdin3d;Mettl5;Mettl4;Mettl15;Ehmt1;Trmt1l;Nsun5;B630005N14Rik;Rrp8;Prmt9;Nsun…	9	Tfb2m;Mettl21a;Hemk1;Mettl10;Mettl23;Smyd2;6430573F11Rik;Mettl20;Prdm14
GO:0032092	brown	positive regulation of protein binding	BP	0.113924	79	2.04635	Cav1;Cdk5;Aktip;Crbn;Map1lc3b;Derl1;Bambi;Cthrc1;Cald1;Abl1;Abl2;Ace;Add1;Add2;Agrn;B2m;Bmp2;Bmp4;Csf3;Mapre1;Eif2ak3;Ephb6;Fkbp1a;Flot1;Gcg;Hfe;Hipk2;Hsf1;Hsp90ab1;Hspa4;Itga2;Lfng;Mef2c;Men1;Mfng;Mmp9;Ngf;Pkd1;Ran;Rfng;Plk2;Tcf7l2;Tert;Tiam1;Traf2;Traf4;Vtn;Wnt5a;Amfr;Arhgef7;Stk3;Gsk3b;Park7;Stk4;Dact1;Ralb;Herpud1;Lrrk2;Plxnd1;Tmem173;Sppl3;Rapgef2;Krit1;Mapre3;Ticam1;Pacs1;Arrb1;Tirap;Usp33;…	9	Cav1;Cdk5;Aktip;Crbn;Map1lc3b;Derl1;Bambi;Cthrc1;Cald1
GO:1901343	brown	negative regulation of vasculature development	BP	0.113924	79	2.04635	Cd59a;Col4a3;Itgb1bp1;Tek;Foxo4;Ecscr;Mmrn2;Adgrb3;Stard13;Adamts1;Adrb2;Angpt2;Angpt4;Agt;Apoh;Rhoa;Bmp4;Bmp7;Cd36;Cxcr3;Ccr2;Col4a2;Crhr2;Cx3cr1;Dcn;Epha2;Fasl;Gtf2i;Hdac5;Hhex;Hoxa5;Cxcl10;Klf4;Lif;Foxc1;Nf1;Ngfr;Notch1;Pde3b;Serpine1;Plg;Pml;Ptger4;Ptn;Ptprm;Rock1;Rock2;Ccl2;Serpinf1;Sema3e;Sema4a;Sparc;Stat1;Tcf4;Thbs1;Thbs2;Tie1;Wnt4;Wt1;Xdh;Map2k5;Synj2bp;Amot;Dll4;Pdcd10;Pf4;Rgcc;Dab2ip;K…	9	Cd59a;Col4a3;Itgb1bp1;Tek;Foxo4;Ecscr;Mmrn2;Adgrb3;Stard13
GO:0042445	brown	hormone metabolic process	BP	0.102362	127	2.0457	Adh7;Bmp5;Cpe;Dio1;Nr3c1;Scp2;Scg5;Aldh1a3;Ero1lb;Ddo;Srd5a1;Plekha1;Hsd17b11;Aanat;Ace;Adh1;Adm;Agt;Aldh1a1;Arnt;Atp1a1;Bmp2;Bmp6;Bmpr1b;Cacna1a;Cel;Comt;Crabp1;Crabp2;Crhbp;Crym;Cyp17a1;Cyp1a1;Cyp1b1;Cyp21a1;Cyp26a1;Dab2;Dio2;Esr1;Fdx1;Gal;Gata3;H2-Ke6;Htt;Hfe;Hif1a;Foxa1;Hpn;Hsd17b1;Hsd17b4;Ide;Igf1;Igf1r;Igf2;Kcnj6;Kcnma1;Myt1;Pax8;Pcsk1;Pcsk2;Furin;Pcsk5;Pcsk6;Pdgfra;Por;Med1;Ppargc1a;Prkg1;…	13	Adh7;Bmp5;Cpe;Dio1;Nr3c1;Scp2;Scg5;Aldh1a3;Ero1lb;Ddo;Srd5a1;Plekha1;Hsd17b11
GO:0030176	brown	integral component of endoplasmic reticulum membrane	CC	0.10989	91	2.03403	G6pc2;Asph;Emc3;Derl1;Saraf;Spcs1;Derl3;Insig2;Elovl4;Pigk;Aup1;Calr;Cln3;Creb3;Atf6b;Dhcr7;Dpm2;Ext1;Fkbp8;Slc37a4;Bscl2;Gpaa1;Pdia3;Hspa5;H13;Lrmp;Emc8;Pkd2;Rce1;Scd1;Srebf2;Stim1;Tap1;Tap2;Tapbp;Tex261;Wfs1;Xbp1;Amfr;Esyt1;Creb3l1;Slc27a2;Slc27a5;Ero1l;Porcn;Abcb9;Dolpp1;Emc6;Acer3;Fam134b;Sppl2a;Emc2;Samd8;Dgat2;Emc4;G6pc3;Dpm3;Rtn4;Fitm1;Emc10;Ankle2;Emc7;Tm7sf2;Sppl2b;Sppl3;Dcstamp;Rhbdd1;P…	10	G6pc2;Asph;Emc3;Derl1;Saraf;Spcs1;Derl3;Insig2;Elovl4;Pigk
GO:0016811	brown	hydrolase activity, acting on carbon-nitrogen (but not peptide) bonds, in linear amides	MF	0.117647	68	2.0279	Aga;Btd;Nit2;Asah2;Ngly1;Sirt3;Wdyhv1;Hdac11;Aspa;Asah1;Cat;Faah;Gls;Hdac2;Hdac3;Hdac5;Hdac6;Klk1;Klk1b5;Klk1b4;Klk1b3;Ntan1;Sin3a;Sin3b;Pglyrp1;Vnn1;Mta2;Vnn3;Sirt6;Brms1l;Hdac7;Park7;Pglyrp2;Sall1;Sirt2;Acer3;Asrgl1;Naaa;Nacc2;Pdf;Sirt5;Ydjc;Hdac8;Afmid;Acy3;Suds3;Naalad2;Macrod2;Sirt4;Nadsyn1;Hdac9;Sirt1;Upb1;Aspg;Oard1;Macrod1;Brms1;Acy1;Atxn3;Hdac10;Acer1;Hdac4;Sirt7;Gls2;Acer2;Amdhd2;Pigl;H…	8	Aga;Btd;Nit2;Asah2;Ngly1;Sirt3;Wdyhv1;Hdac11
GO:1902936	brown	phosphatidylinositol bisphosphate binding	MF	0.117647	68	2.0279	Actn2;Kif16b;Plcb1;Phlda3;Wdr45;Plekha1;Stxbp6;Zfyve1;Akt1;Anxa2;Dab2;Asap1;Gab2;Hcn1;Kcnj2;Kcnq1;Commd1;Myo1b;Ncf1;Pfn1;Pfn2;Plcd1;Twf1;Rph3a;Rs1;Syt1;Tulp1;Vil1;Twf2;Dapp1;Cadps;Fam21;Ttpa;Wipi1;Snx3;Plek;Kcnj1;Jph2;Chmp3;Wdr45b;Exoc1;Snx20;Amer2;Amer1;Clvs1;Wipi2;Rab35;Krit1;Sytl2;Pard3;Ldlrap1;Snx21;Arap3;Gbf1;Plekha5;Tirap;Snx18;Pirt;Adap2;Fcho2;Mark1;Mapkap1;Sestd1;Snx14;Myo1g;Sh3pxd2b;Apba…	8	Actn2;Kif16b;Plcb1;Phlda3;Wdr45;Plekha1;Stxbp6;Zfyve1
GO:0045022	brown	early endosome to late endosome transport	BP	0.138889	36	2.01319	Aktip;Kif16b;Snx12;Pik3c3;Rab5a;Dab2;Emp2;Ighm;Lyst;Msn;Rab7;Rdx;Vps4b;Src;Ezr;Map2k1;Map2k2;Mapk1;Mapk3;Snf8;Snx3;Stx8;Vps11;Fam160a2;Snx16;Mtmr2;Hook1;Ptpn23;Hook2;Flna;Rab21;Lmtk2;Dnajc13;Ankrd27;Rilp;Hook3	5	Aktip;Kif16b;Snx12;Pik3c3;Rab5a
GO:0051353	brown	positive regulation of oxidoreductase activity	BP	0.138889	36	2.01319	Ccs;Dhfr;Edn1;Npr3;Snca;Abl1;Abl2;Akt1;Apoe;Atp7a;Cdh3;Cyp27b1;Edn2;Esr1;Fcer2a;Fdx1;Fxn;Gch1;Gdnf;Htr2b;Il1b;Kras;Lgals9;Por;Ptk2b;Rgn;Scarb1;Terf2;Tert;Tnf;Vdr;Rfk;Ripk3;Park7;Nod1;Nod2	5	Ccs;Dhfr;Edn1;Npr3;Snca
GO:00064971	brown	protein lipidation	BP	0.1125	80	2.00538	Ppm1a;Wdr45;Pigb;Pigp;Alg5;Atg10;Svip;Pigk;Atg4a;Abca1;Alox12b;Atg5;Dpm1;Dpm2;Gpaa1;Pigq;Mttp;Nmt1;Nmt2;Piga;Pigf;Ppm1b;Pign;Zdhhc8;Wipi1;Porcn;Pigo;Golga7;Zdhhc12;Pigyl;Pyurf;Atg4b;Wdr45b;Zdhhc6;Pigc;Atg12;Pigm;Zdhhc21;Dpm3;Zdhhc3;Pigw;Zdhhc2;Zdhhc1;Pigx;Zdhhc16;Atg7;Hhatl;Wipi2;Zdhhc20;Clip3;Pigt;Selk;Rab3gap2;Zdhhc7;Zdhhc15;Pigh;Map6d1;Zdhhc9;Zdhhc14;Mppe1;Rab3gap1;Hhat;Zdhhc5;Pigu;Pigv;Pgap2;…	9	Ppm1a;Wdr45;Pigb;Pigp;Alg5;Atg10;Svip;Pigk;Atg4a
GO:0031012	cyan	extracellular matrix	CC	0.196078	357	28.3578	Aebp1;Bgn;Bmp4;Runx1;Col14a1;Col18a1;Col3a1;Col5a1;Col5a2;Col6a1;Col6a2;Col8a1;Col1a1;Col1a2;Dcn;Ecm1;Eln;Fbln1;Fbln2;Fbn1;Fbn2;Fmod;Fn1;Gpc3;Lama2;Lgals1;Lox;Lum;Il1rl1;Mmp2;Ogn;Pcolce;Serpinf1;Serpine2;Tgm2;Thbs2;Timp1;Clec3b;Tnc;Trf;Vtn;Wisp1;Gpc6;Lamc3;Mmp17;Adamts8;Mfap5;Postn;Col5a3;Cpxm2;Htra1;Dpt;Mmp19;Smoc2;Ccdc80;Rarres2;Mfap4;Tnxb;Col16a1;Prelp;Col28a1;Adamts2;Spon1;Podn;Ltbp1;Abi3bp;F…	70	Aebp1;Bgn;Bmp4;Runx1;Col14a1;Col18a1;Col3a1;Col5a1;Col5a2;Col6a1;Col6a2;Col8a1;Col1a1;Col1a2;Dcn;Ecm1;Eln;Fbln1;Fbln2;Fbn1;Fbn2;Fmod;Fn1;Gpc3;Lama2;Lgals1;Lox;Lum;Il1rl1;Mmp2;Ogn;Pcolce;Serpinf1;Serpine2;Tgm2;Thbs2;Timp1;Clec3b;Tnc;Trf;Vtn;Wisp1;Gpc6;Lamc3;Mmp17;Adamts8;Mfap5;Postn;Col5a3;Cpxm2;Htra1;Dpt;Mmp19;Smoc2;Ccdc80;Rarres2;Mfap4;Tnxb;Col16a1;Prelp;Col28a1;Adamts2;Spon1;Podn;Ltbp1;Abi3bp;F…
GO:0005578	cyan	proteinaceous extracellular matrix	CC	0.209836	305	28.1598	Bgn;Bmp4;Runx1;Col14a1;Col18a1;Col3a1;Col5a1;Col5a2;Col6a1;Col6a2;Col8a1;Col1a1;Col1a2;Dcn;Ecm1;Eln;Fbln1;Fbln2;Fbn1;Fbn2;Fmod;Fn1;Gpc3;Lama2;Lgals1;Lox;Lum;Il1rl1;Mmp2;Ogn;Serpinf1;Tgm2;Thbs2;Timp1;Clec3b;Tnc;Trf;Vtn;Wisp1;Gpc6;Lamc3;Mmp17;Adamts8;Mfap5;Postn;Col5a3;Dpt;Mmp19;Smoc2;Ccdc80;Mfap4;Tnxb;Col16a1;Prelp;Col28a1;Adamts2;Spon1;Podn;Ltbp1;Abi3bp;Frem1;Flrt2;Ecm2;Col6a5;Ache;Adamts1;Acan;A…	64	Bgn;Bmp4;Runx1;Col14a1;Col18a1;Col3a1;Col5a1;Col5a2;Col6a1;Col6a2;Col8a1;Col1a1;Col1a2;Dcn;Ecm1;Eln;Fbln1;Fbln2;Fbn1;Fbn2;Fmod;Fn1;Gpc3;Lama2;Lgals1;Lox;Lum;Il1rl1;Mmp2;Ogn;Serpinf1;Tgm2;Thbs2;Timp1;Clec3b;Tnc;Trf;Vtn;Wisp1;Gpc6;Lamc3;Mmp17;Adamts8;Mfap5;Postn;Col5a3;Dpt;Mmp19;Smoc2;Ccdc80;Mfap4;Tnxb;Col16a1;Prelp;Col28a1;Adamts2;Spon1;Podn;Ltbp1;Abi3bp;Frem1;Flrt2;Ecm2;Col6a5
GO:0044420	cyan	extracellular matrix component	CC	0.246154	130	21.6996	Runx1;Col18a1;Col3a1;Col5a1;Col5a2;Col8a1;Col1a1;Col1a2;Dcn;Eln;Fbln1;Fbn1;Fbn2;Fn1;Lama2;Lum;Serpinf1;Thbs2;Timp1;Tnc;Trf;Vtn;Lamc3;Mfap5;Col5a3;Smoc2;Ccdc80;Mfap4;Tnxb;Col28a1;Ltbp1;Frem1;Ache;Adamts1;Acan;Agrn;Alb;Amelx;Ang;Anxa2;Cask;Cd151;Entpd1;Entpd2;Col11a1;Col11a2;Col12a1;Col15a1;Col17a1;Col2a1;Col4a1;Col4a2;Col4a3;Col4a4;Col4a5;Col7a1;Smc3;Cst3;Dag1;Dlg1;Efna5;Fgf9;Gsto1;Hspg2;Itga6;Itg…	32	Runx1;Col18a1;Col3a1;Col5a1;Col5a2;Col8a1;Col1a1;Col1a2;Dcn;Eln;Fbln1;Fbn1;Fbn2;Fn1;Lama2;Lum;Serpinf1;Thbs2;Timp1;Tnc;Trf;Vtn;Lamc3;Mfap5;Col5a3;Smoc2;Ccdc80;Mfap4;Tnxb;Col28a1;Ltbp1;Frem1
GO:0008201	cyan	heparin binding	MF	0.25	124	21.5419	Bmp4;Cfh;Col5a1;Fmod;Fn1;Fstl1;Lipg;Ogn;Pcolce;Ccl2;Ccl7;Ccl8;Selp;Serpine2;Thbs2;Clec3b;Vtn;Wisp1;Adamts8;Postn;Col5a3;Pf4;Smoc2;Ccdc80;Rspo3;Tnxb;Gpnmb;Prelp;Col23a1;Abi3bp;Ecm2;Adamts1;Ager;Ang;Aplp1;Aplp2;Apoe;Apoh;App;Serpinc1;Bmp7;Chrd;Col13a1;Comp;Fgf1;Fgf12;Fgf14;Fgf2;Fgf7;Fgf9;Fgfr1;Fgfr2;Fgfr4;Ctgf;Serpind1;Hdgf;Hbegf;Lipc;Cxcl10;Cyr61;Itgam;Lamc2;Lpl;Lrpap1;Ltbp2;Ltf;Lxn;Mdk;Mmp7;Mstn;…	31	Bmp4;Cfh;Col5a1;Fmod;Fn1;Fstl1;Lipg;Ogn;Pcolce;Ccl2;Ccl7;Ccl8;Selp;Serpine2;Thbs2;Clec3b;Vtn;Wisp1;Adamts8;Postn;Col5a3;Pf4;Smoc2;Ccdc80;Rspo3;Tnxb;Gpnmb;Prelp;Col23a1;Abi3bp;Ecm2
GO:0005539	cyan	glycosaminoglycan binding	MF	0.214724	163	21.0138	Bgn;Bmp4;Cfh;Col5a1;Dcn;Fmod;Fn1;Fstl1;Lipg;Ogn;Pcolce;Ccl2;Ccl7;Ccl8;Selp;Serpine2;Thbs2;Clec3b;Tnfaip6;Vtn;Wisp1;Adamts8;Postn;Col5a3;Pf4;Smoc2;Ccdc80;Rspo3;Tnxb;Gpnmb;Prelp;Col23a1;Layn;Abi3bp;Ecm2;Adamts1;Acan;Ager;Agrn;Ang;Aplp1;Aplp2;Apoe;Apoh;App;Serpinc1;Bcan;Bmp7;C1qbp;Cd44;Chrd;Col13a1;Comp;Hapln1;Vcan;Ncan;Eng;Fgf1;Fgf12;Fgf14;Fgf2;Fgf7;Fgf9;Fgfr1;Fgfr2;Fgfr4;Ctgf;Serpind1;Hdgf;Hbegf;H…	35	Bgn;Bmp4;Cfh;Col5a1;Dcn;Fmod;Fn1;Fstl1;Lipg;Ogn;Pcolce;Ccl2;Ccl7;Ccl8;Selp;Serpine2;Thbs2;Clec3b;Tnfaip6;Vtn;Wisp1;Adamts8;Postn;Col5a3;Pf4;Smoc2;Ccdc80;Rspo3;Tnxb;Gpnmb;Prelp;Col23a1;Layn;Abi3bp;Ecm2
GO:0030198	cyan	extracellular matrix organization	BP	0.187817	197	20.0083	Serpinh1;Col14a1;Col18a1;Col3a1;Col5a1;Col5a2;Col1a1;Col1a2;Cyp1b1;Eln;Fbln1;Foxc2;Fmod;Fn1;Gpm6b;Has1;Has2;Lox;Lum;Ddr2;Pdgfra;Vtn;Mfap5;Postn;Col5a3;Dpt;Smoc2;Ccdc80;Mfap4;Tnxb;Adamts2;Sulf1;Itga8;Sh3pxd2b;Abi3bp;Flrt2;Ecm2;Abl1;Abl2;Acan;Agt;Apbb1;Apbb2;Aplp1;Aplp2;App;Atp7a;Bcl3;Ddr1;Anxa2;Cd36;Mia;Col11a1;Col11a2;Col19a1;Col2a1;Col4a1;Col4a3;Col4a4;Comp;Cst3;Ctss;Dag1;Dmp1;Dpp4;Elf3;Eng;Ercc…	37	Serpinh1;Col14a1;Col18a1;Col3a1;Col5a1;Col5a2;Col1a1;Col1a2;Cyp1b1;Eln;Fbln1;Foxc2;Fmod;Fn1;Gpm6b;Has1;Has2;Lox;Lum;Ddr2;Pdgfra;Vtn;Mfap5;Postn;Col5a3;Dpt;Smoc2;Ccdc80;Mfap4;Tnxb;Adamts2;Sulf1;Itga8;Sh3pxd2b;Abi3bp;Flrt2;Ecm2
GO:0030199	cyan	collagen fibril organization	BP	0.4	40	19.9976	Serpinh1;Col14a1;Col3a1;Col5a1;Col5a2;Col1a1;Col1a2;Cyp1b1;Foxc2;Fmod;Lox;Lum;Ddr2;Dpt;Tnxb;Adamts2;Acan;Atp7a;Anxa2;Col11a1;Col11a2;Col2a1;Lmx1b;Foxc1;Mmp11;Nf1;P4ha1;Serpinf2;Scx;Sfrp2;Tgfb2;Tgfbr1;Grem1;Plod3;P3h1;Loxl2;Mkx;Chadl;Adamts14;Mia3	16	Serpinh1;Col14a1;Col3a1;Col5a1;Col5a2;Col1a1;Col1a2;Cyp1b1;Foxc2;Fmod;Lox;Lum;Ddr2;Dpt;Tnxb;Adamts2
GO:0043062	cyan	extracellular structure organization	BP	0.186869	198	19.9495	Serpinh1;Col14a1;Col18a1;Col3a1;Col5a1;Col5a2;Col1a1;Col1a2;Cyp1b1;Eln;Fbln1;Foxc2;Fmod;Fn1;Gpm6b;Has1;Has2;Lox;Lum;Ddr2;Pdgfra;Vtn;Mfap5;Postn;Col5a3;Dpt;Smoc2;Ccdc80;Mfap4;Tnxb;Adamts2;Sulf1;Itga8;Sh3pxd2b;Abi3bp;Flrt2;Ecm2;Abl1;Abl2;Acan;Agt;Apbb1;Apbb2;Aplp1;Aplp2;App;Atp7a;Bcl3;Ddr1;Anxa2;Cd36;Mia;Col11a1;Col11a2;Col19a1;Col2a1;Col4a1;Col4a3;Col4a4;Comp;Cst3;Ctss;Dag1;Dmp1;Dpp4;Elf3;Eng;Ercc…	37	Serpinh1;Col14a1;Col18a1;Col3a1;Col5a1;Col5a2;Col1a1;Col1a2;Cyp1b1;Eln;Fbln1;Foxc2;Fmod;Fn1;Gpm6b;Has1;Has2;Lox;Lum;Ddr2;Pdgfra;Vtn;Mfap5;Postn;Col5a3;Dpt;Smoc2;Ccdc80;Mfap4;Tnxb;Adamts2;Sulf1;Itga8;Sh3pxd2b;Abi3bp;Flrt2;Ecm2
GO:0005581	cyan	collagen trimer	CC	0.28	75	18.8656	Col14a1;Col18a1;Col3a1;Col5a1;Col5a2;Col6a1;Col6a2;Col8a1;Col1a1;Col1a2;Dcn;Lox;Lum;Col5a3;Colec11;Tnxb;Col16a1;C1qtnf7;Col28a1;Col23a1;Col6a5;C1qa;C1qb;C1qc;Col10a1;Col11a1;Col11a2;Col12a1;Col13a1;Col15a1;Col17a1;Col19a1;Col2a1;Col4a1;Col4a2;Col4a3;Col4a4;Col4a5;Col6a3;Col7a1;Col9a2;Col9a3;Eda;Fcna;Mbl1;Mbl2;Msr1;Sftpd;C1qtnf1;Col6a4;Cthrc1;C1qtnf2;Col24a1;C1qtnf6;Col20a1;Wdr33;Col25a1;C1qtnf3;C…	21	Col14a1;Col18a1;Col3a1;Col5a1;Col5a2;Col6a1;Col6a2;Col8a1;Col1a1;Col1a2;Dcn;Lox;Lum;Col5a3;Colec11;Tnxb;Col16a1;C1qtnf7;Col28a1;Col23a1;Col6a5
GO:0005583	cyan	fibrillar collagen trimer	CC	0.666667	12	18.5261	Col3a1;Col5a1;Col5a2;Col1a1;Col1a2;Lum;Col5a3;Tnxb;Col11a1;Col11a2;Col2a1;Col27a1	8	Col3a1;Col5a1;Col5a2;Col1a1;Col1a2;Lum;Col5a3;Tnxb
GO:0098643	cyan	banded collagen fibril	CC	0.666667	12	18.5261	Col3a1;Col5a1;Col5a2;Col1a1;Col1a2;Lum;Col5a3;Tnxb;Col11a1;Col11a2;Col2a1;Col27a1	8	Col3a1;Col5a1;Col5a2;Col1a1;Col1a2;Lum;Col5a3;Tnxb
GO:1901681	cyan	sulfur compound binding	MF	0.165049	206	17.7681	Bmp4;Cfh;Col5a1;Fmod;Fn1;Fst;Fstl1;Gpc3;Lipg;Ogn;Pcolce;Ccl2;Ccl7;Ccl8;Selp;Serpine2;Thbs2;Clec3b;Vtn;Wisp1;Gpc6;Adamts8;Postn;Col5a3;Pf4;Smoc2;Ccdc80;Rspo3;Tnxb;Gpnmb;Prelp;Col23a1;Abi3bp;Ecm2;Acadl;Acadm;Acadvl;Acads;Acox1;Adamts1;Ager;Agrn;Ang;Aplp1;Aplp2;Apoe;Apoh;App;Serpinc1;Bmp7;Cbs;Cd34;Chrd;Col13a1;Comp;Dbi;Dbil5;Dld;Fgf1;Fgf12;Fgf14;Fgf2;Fgf7;Fgf9;Fgfr1;Fgfr2;Fgfr4;Ctgf;Glra1;Gpc1;Gpc4;…	34	Bmp4;Cfh;Col5a1;Fmod;Fn1;Fst;Fstl1;Gpc3;Lipg;Ogn;Pcolce;Ccl2;Ccl7;Ccl8;Selp;Serpine2;Thbs2;Clec3b;Vtn;Wisp1;Gpc6;Adamts8;Postn;Col5a3;Pf4;Smoc2;Ccdc80;Rspo3;Tnxb;Gpnmb;Prelp;Col23a1;Abi3bp;Ecm2
GO:0008009	cyan	chemokine activity	MF	0.4	30	17.3133	Cxcl1;Ccl11;Ccl2;Ccl22;Ccl7;Ccl8;Cxcl5;Ccl19;Pf4;Cxcl14;Cxcl3;Gm2564;Cxcl10;Cxcl9;Ccl12;Ccl17;Ccl20;Ccl25;Ccl3;Ccl4;Ccl5;Ccl6;Ccl9;Cxcl2;Cx3cl1;Cxcl12;Cxcl13;Ccl28;Cxcl16;Cklf	12	Cxcl1;Ccl11;Ccl2;Ccl22;Ccl7;Ccl8;Cxcl5;Ccl19;Pf4;Cxcl14;Cxcl3;Gm2564
GO:0098644	cyan	complex of collagen trimers	CC	0.473684	19	16.4106	Col3a1;Col5a1;Col5a2;Col1a1;Col1a2;Dcn;Lum;Col5a3;Tnxb;Col11a1;Col11a2;Col2a1;Col4a1;Col4a2;Col4a3;Col4a4;Col4a5;Col4a6;Col27a1	9	Col3a1;Col5a1;Col5a2;Col1a1;Col1a2;Dcn;Lum;Col5a3;Tnxb
GO:0005201	cyan	extracellular matrix structural constituent	MF	0.37931	29	16.1069	Col3a1;Col5a1;Col5a2;Col1a1;Col1a2;Eln;Fbln1;Fbn1;Fbn2;Mfap5;Prelp;Amelx;Col11a1;Col11a2;Col2a1;Col4a1;Col4a2;Col4a3;Col4a4;Comp;Lama1;Lamb1;Mgp;Tecta;Pxdn;Col24a1;Emilin1;Lamc1;Col27a1	11	Col3a1;Col5a1;Col5a2;Col1a1;Col1a2;Eln;Fbln1;Fbn1;Fbn2;Mfap5;Prelp
GO:0070098	cyan	chemokine-mediated signaling pathway	BP	0.282609	46	14.9075	Ccr7;Ackr1;Cxcl1;Ccl11;Ccl2;Ccl22;Ccl7;Ccl8;Cxcl5;Ccl19;Pf4;Cxcl3;Gm2564;Cxcr2;Cxcr3;Cxcr4;Ccr1;Ccr5;Ackr3;Cx3cr1;Cxcl10;Cxcl9;Padi2;Ptk2b;Robo1;Ccl12;Ccl17;Ccl20;Ccl25;Ccl3;Ccl4;Ccl5;Ccl6;Ccl9;Cxcl2;Cx3cl1;Cxcl12;Slit2;Slit3;Tff2;Thpo;Cib1;Cxcl13;Trem2;Gpr75;Ackr4	13	Ccr7;Ackr1;Cxcl1;Ccl11;Ccl2;Ccl22;Ccl7;Ccl8;Cxcl5;Ccl19;Pf4;Cxcl3;Gm2564
GO:0042379	cyan	chemokine receptor binding	MF	0.292683	41	14.6018	Cxcl1;Ccl11;Ccl2;Ccl22;Ccl7;Ccl8;Cxcl5;Ccl19;Pf4;Cxcl14;Cxcl3;Gm2564;Creb3;Cxcl10;Itch;Jak1;Cxcl9;Nes;Ccl12;Ccl17;Ccl20;Ccl25;Ccl3;Ccl4;Ccl5;Ccl6;Ccl9;Cxcl2;Cx3cl1;Cxcl12;Stat1;Stat3;Tff2;Ccrl2;Cxcl13;Ccl28;Cxcl16;S100a14;Cklf;Cnih4;Nup85	12	Cxcl1;Ccl11;Ccl2;Ccl22;Ccl7;Ccl8;Cxcl5;Ccl19;Pf4;Cxcl14;Cxcl3;Gm2564
GO:0005604	cyan	basement membrane	CC	0.188119	101	14.3107	Runx1;Col18a1;Col5a1;Col8a1;Fbln1;Fbn1;Fn1;Lama2;Serpinf1;Thbs2;Timp1;Tnc;Trf;Vtn;Lamc3;Smoc2;Ccdc80;Col28a1;Frem1;Ache;Adamts1;Acan;Agrn;Alb;Amelx;Ang;Anxa2;Cask;Cd151;Entpd1;Entpd2;Col15a1;Col17a1;Col2a1;Col4a1;Col4a2;Col4a3;Col4a4;Col4a5;Col7a1;Smc3;Cst3;Dag1;Dlg1;Efna5;Fgf9;Gsto1;Hspg2;Itga6;Itgb1;Lad1;Lama1;Lama3;Lama4;Lama5;Lamb1;Lamb2;Lamb3;Lamc2;Rpsa;Loxl1;Matn2;Nid1;Nid2;Ntn1;Ptn;Sparc;S…	19	Runx1;Col18a1;Col5a1;Col8a1;Fbln1;Fbn1;Fn1;Lama2;Serpinf1;Thbs2;Timp1;Tnc;Trf;Vtn;Lamc3;Smoc2;Ccdc80;Col28a1;Frem1
GO:0005518	cyan	collagen binding	MF	0.241379	58	14.1646	Serpinh1;Ctsk;Dcn;Lum;Mrc2;Ddr2;Pcolce;Vtn;Antxr1;Tnxb;Podn;Itga11;Abi3bp;Ecm2;Ache;Adam9;Ap1g1;Ddr1;Coch;Comp;Ctsb;Ctss;Dpp4;Gp5;Gpc1;Adgrg1;Itga2;Itga3;Itgb1;Smad3;Smad4;Smad7;Mmp13;Map1a;Nid1;Pak1;Pdgfa;Pdgfb;Srgn;Sparc;Tgfbi;Thbs1;Thbs4;Tll1;Ush2a;Vwf;Hsd17b12;C1qtnf1;Aspn;Lrrc15;Pcolce2;Itga9;Itga1;Cspg4;Itga10;Chadl;Rell2;Ccbe1	14	Serpinh1;Ctsk;Dcn;Lum;Mrc2;Ddr2;Pcolce;Vtn;Antxr1;Tnxb;Podn;Itga11;Abi3bp;Ecm2
GO:0005125	cyan	cytokine activity	MF	0.154362	149	14.0108	Bmp4;Csf2;Csf3;Cxcl1;Il11;Il6;Inhba;Lif;Ccl11;Ccl2;Ccl22;Ccl7;Ccl8;Cxcl5;Timp1;Ccl19;Clcf1;Pf4;Cxcl14;Il34;Il33;Cxcl3;Gm2564;Areg;Bmp1;Bmp2;Bmp5;Bmp6;Bmp7;Bmp8a;Bmp8b;Gdf2;Cer1;Cntf;Crlf1;Csf1;Ctf1;Lefty1;Edn1;Aimp1;Fasl;Fgf2;Flt3l;Gdf1;Gdf10;Gdf11;Gdf3;Gdf5;Gdf9;Gpi1;Grn;Hmgb1;Cxcl10;Ifna2;Ifnb1;Il10;Il12a;Il12b;Il15;Il16;Il18;Il1a;Il1b;Il1rn;Il2;Il4;Il5;Il7;Inha;Inhbb;Lta;Ltb;Kitl;Mif;Cxcl9;Mst…	23	Bmp4;Csf2;Csf3;Cxcl1;Il11;Il6;Inhba;Lif;Ccl11;Ccl2;Ccl22;Ccl7;Ccl8;Cxcl5;Timp1;Ccl19;Clcf1;Pf4;Cxcl14;Il34;Il33;Cxcl3;Gm2564
GO:0040017	cyan	positive regulation of locomotion	BP	0.0969267	423	13.986	Aqp1;Bdkrb1;Bmp4;Cdh13;Ccr7;Col18a1;Col1a1;Cyp1b1;Fbln1;Foxc2;Fn1;Gli1;Pdpn;Cxcl1;Has2;Hgf;Itga5;Lgals1;Mmp2;Ddr2;Pdgfra;Pld1;Ptgs2;Ccl11;Ccl2;Cxcl5;Sele;Selp;Sema3b;Sema6a;Tnfaip6;Trf;Vtn;Ccl19;Postn;Pf4;Cxcl14;Rarres2;Adgra2;Mylk;Cxcl3;Acvr1;Acvr1b;Adam10;Adam17;Adam8;Adam9;Adora3;Adra2a;Ager;Angpt1;Angpt4;Agt;Aif1;Akt1;Akt2;Alox12;Anxa3;Aoc3;Apc;Rhob;Rhod;Arhgap5;Artn;Atp8a1;Bcl2;Bmp2;Bmpr2;C1…	41	Aqp1;Bdkrb1;Bmp4;Cdh13;Ccr7;Col18a1;Col1a1;Cyp1b1;Fbln1;Foxc2;Fn1;Gli1;Pdpn;Cxcl1;Has2;Hgf;Itga5;Lgals1;Mmp2;Ddr2;Pdgfra;Pld1;Ptgs2;Ccl11;Ccl2;Cxcl5;Sele;Selp;Sema3b;Sema6a;Tnfaip6;Trf;Vtn;Ccl19;Postn;Pf4;Cxcl14;Rarres2;Adgra2;Mylk;Cxcl3
GO:2000147	cyan	positive regulation of cell motility	BP	0.0987654	405	13.9851	Aqp1;Bdkrb1;Bmp4;Cdh13;Ccr7;Col18a1;Col1a1;Cyp1b1;Fbln1;Foxc2;Fn1;Gli1;Pdpn;Cxcl1;Has2;Hgf;Itga5;Mmp2;Ddr2;Pdgfra;Pld1;Ptgs2;Ccl11;Ccl2;Cxcl5;Sele;Selp;Sema3b;Sema6a;Tnfaip6;Trf;Vtn;Ccl19;Postn;Pf4;Cxcl14;Rarres2;Adgra2;Mylk;Cxcl3;Acvr1;Acvr1b;Adam10;Adam17;Adam8;Adam9;Adora3;Adra2a;Ager;Angpt1;Angpt4;Agt;Aif1;Akt1;Akt2;Alox12;Anxa3;Aoc3;Apc;Rhob;Rhod;Arhgap5;Atp8a1;Bcl2;Bmp2;Bmpr2;C1qbp;C3ar1;C5…	40	Aqp1;Bdkrb1;Bmp4;Cdh13;Ccr7;Col18a1;Col1a1;Cyp1b1;Fbln1;Foxc2;Fn1;Gli1;Pdpn;Cxcl1;Has2;Hgf;Itga5;Mmp2;Ddr2;Pdgfra;Pld1;Ptgs2;Ccl11;Ccl2;Cxcl5;Sele;Selp;Sema3b;Sema6a;Tnfaip6;Trf;Vtn;Ccl19;Postn;Pf4;Cxcl14;Rarres2;Adgra2;Mylk;Cxcl3
GO:0030335	cyan	positive regulation of cell migration	BP	0.0987342	395	13.8021	Aqp1;Bdkrb1;Bmp4;Cdh13;Ccr7;Col18a1;Col1a1;Cyp1b1;Fbln1;Foxc2;Fn1;Gli1;Pdpn;Cxcl1;Has2;Hgf;Itga5;Mmp2;Ddr2;Pdgfra;Pld1;Ptgs2;Ccl11;Ccl2;Cxcl5;Sele;Selp;Sema3b;Sema6a;Tnfaip6;Vtn;Ccl19;Postn;Pf4;Cxcl14;Rarres2;Adgra2;Mylk;Cxcl3;Acvr1;Acvr1b;Adam10;Adam17;Adam8;Adam9;Adora3;Adra2a;Ager;Angpt1;Angpt4;Agt;Aif1;Akt1;Akt2;Alox12;Anxa3;Aoc3;Apc;Rhob;Rhod;Arhgap5;Atp8a1;Bcl2;Bmp2;Bmpr2;C1qbp;C3ar1;C5ar1;…	39	Aqp1;Bdkrb1;Bmp4;Cdh13;Ccr7;Col18a1;Col1a1;Cyp1b1;Fbln1;Foxc2;Fn1;Gli1;Pdpn;Cxcl1;Has2;Hgf;Itga5;Mmp2;Ddr2;Pdgfra;Pld1;Ptgs2;Ccl11;Ccl2;Cxcl5;Sele;Selp;Sema3b;Sema6a;Tnfaip6;Vtn;Ccl19;Postn;Pf4;Cxcl14;Rarres2;Adgra2;Mylk;Cxcl3
GO:0048407	cyan	platelet-derived growth factor binding	MF	0.5	12	13.7874	Col3a1;Col5a1;Col6a1;Col1a1;Col1a2;Pdgfra;Col2a1;Col4a1;Pdgfa;Pdgfb;Pdgfrb;Pdap1	6	Col3a1;Col5a1;Col6a1;Col1a1;Col1a2;Pdgfra
GO:0051272	cyan	positive regulation of cellular component movement	BP	0.0966184	414	13.7806	Aqp1;Bdkrb1;Bmp4;Cdh13;Ccr7;Col18a1;Col1a1;Cyp1b1;Fbln1;Foxc2;Fn1;Gli1;Pdpn;Cxcl1;Has2;Hgf;Itga5;Mmp2;Ddr2;Pdgfra;Pld1;Ptgs2;Ccl11;Ccl2;Cxcl5;Sele;Selp;Sema3b;Sema6a;Tnfaip6;Trf;Vtn;Ccl19;Postn;Pf4;Cxcl14;Rarres2;Adgra2;Mylk;Cxcl3;Acvr1;Acvr1b;Adam10;Adam17;Adam8;Adam9;Adora3;Adra2a;Ager;Angpt1;Angpt4;Agt;Aif1;Akt1;Akt2;Alox12;Anxa3;Aoc3;Apc;Rhob;Rhod;Arhgap5;Atp8a1;Bcl2;Bcl6;Bmp2;Bmpr2;C1qbp;C3a…	40	Aqp1;Bdkrb1;Bmp4;Cdh13;Ccr7;Col18a1;Col1a1;Cyp1b1;Fbln1;Foxc2;Fn1;Gli1;Pdpn;Cxcl1;Has2;Hgf;Itga5;Mmp2;Ddr2;Pdgfra;Pld1;Ptgs2;Ccl11;Ccl2;Cxcl5;Sele;Selp;Sema3b;Sema6a;Tnfaip6;Trf;Vtn;Ccl19;Postn;Pf4;Cxcl14;Rarres2;Adgra2;Mylk;Cxcl3
GO:0032963	cyan	collagen metabolic process	BP	0.2	70	12.7202	Bmp4;Serpinh1;Col5a1;Col1a1;Ctsk;Il6;Mmp2;Mrc2;Ccl2;Mmp19;Mfap4;Tnxb;Adamts2;Ltbp1;Adam15;Adora2b;Ager;Arg1;Ctsb;Ctss;Eng;F2;F2r;Fap;Fgfr3;Ctgf;Hif1a;Id1;Ihh;Il18;Il6ra;Itga2;Itgb1;Mmp10;Mmp11;Mmp13;Mmp14;Mmp16;Mmp3;Mmp7;Mmp9;P2rx7;Pdgfb;Pdgfrb;Pepd;Prkcd;Serpinf2;Ppard;Pparg;Scx;Tgfb1;Tgfb3;Tgfbr3;Prss2;Wnt4;Cbx8;Prdx5;P3h1;Rgcc;Errfi1;Rap1a;Cygb;Tram2;Tns2;P3h2;Mkx;Rapgef3;Suco;Ep300;Adamts3	14	Bmp4;Serpinh1;Col5a1;Col1a1;Ctsk;Il6;Mmp2;Mrc2;Ccl2;Mmp19;Mfap4;Tnxb;Adamts2;Ltbp1
GO:0044259	cyan	multicellular organismal macromolecule metabolic process	BP	0.197183	71	12.616	Bmp4;Serpinh1;Col5a1;Col1a1;Ctsk;Il6;Mmp2;Mrc2;Ccl2;Mmp19;Mfap4;Tnxb;Adamts2;Ltbp1;Adam15;Adora2b;Ager;Arg1;Ctsb;Ctss;Eng;F2;F2r;Fap;Fgfr3;Ctgf;Hif1a;Id1;Ihh;Il18;Il6ra;Itga2;Itgb1;Mmp10;Mmp11;Mmp13;Mmp14;Mmp16;Mmp3;Mmp7;Mmp9;P2rx7;Pdgfb;Pdgfrb;Pepd;Prkcd;Serpinf2;Ppard;Pparg;Scx;Tgfb1;Tgfb3;Tgfbr3;Prss2;Wnt4;Cbx8;Prdx5;P3h1;Rgcc;Errfi1;Acaca;Rap1a;Cygb;Tram2;Tns2;P3h2;Mkx;Rapgef3;Suco;Ep300;Adam…	14	Bmp4;Serpinh1;Col5a1;Col1a1;Ctsk;Il6;Mmp2;Mrc2;Ccl2;Mmp19;Mfap4;Tnxb;Adamts2;Ltbp1
GO:0005614	cyan	interstitial matrix	CC	0.4	15	12.237	Col14a1;Tnc;Smoc2;Ccdc80;Abi3bp;Ecm2;Igf1;Mamdc2;Vit;Nav2;Kazald1;Adamtsl4;Vwa1;Egflam;Vwc2	6	Col14a1;Tnc;Smoc2;Ccdc80;Abi3bp;Ecm2
GO:0001527	cyan	microfibril	CC	0.454545	11	11.9627	Fbn1;Fbn2;Mfap5;Mfap4;Ltbp1;Mfap2;Adamtsl5;Mfap1a;Thsd4;Adamts10;Mfap1b	5	Fbn1;Fbn2;Mfap5;Mfap4;Ltbp1
GO:0043206	cyan	extracellular fibril organization	BP	0.454545	11	11.9627	Col3a1;Col5a1;Mfap5;Mfap4;Tnxb;Cst3;Fkbp1a;Ilk;Ltbp2;Muc5ac;B4galt7	5	Col3a1;Col5a1;Mfap5;Mfap4;Tnxb
GO:0048247	cyan	lymphocyte chemotaxis	BP	0.25	36	11.577	Ccr7;Ccl11;Ccl2;Ccl22;Ccl7;Ccl8;Ccl19;Cxcl14;Gm2564;Adam10;Adam17;Adam8;Cxcr3;Ccr2;Gas6;Cxcl10;Padi2;Ptk2b;Ccl12;Ccl17;Ccl20;Ccl25;Ccl27a;Ccl3;Ccl4;Ccl5;Ccl6;Ccl9;Cx3cl1;Wnt5a;Pik3cg;Tnfsf14;Cxcl13;Cxcl16;Cklf;Tmem102	9	Ccr7;Ccl11;Ccl2;Ccl22;Ccl7;Ccl8;Ccl19;Cxcl14;Gm2564
GO:0031589	cyan	cell-substrate adhesion	BP	0.0989011	273	11.4553	Cdh13;Col3a1;Col8a1;Col1a1;Epha3;Fbln1;Fbln2;Fn1;Gpm6b;Has2;Itga5;Lgals1;Vcam1;Vtn;Axl;Postn;Col5a3;Smoc2;Ccdc80;Antxr1;Tnxb;Col16a1;Itga8;Itga11;Abi3bp;Frem1;Ecm2;Abl1;Macf1;Actn2;Acvrl1;Adam15;Adam8;Adam9;Angpt1;Angpt2;Agt;Apoa1;Apod;Rhoa;Rhod;Arhgap6;Bcl2;Bcl6;Bcl2l11;C1qbp;Ddr1;Calr;Cask;Ctnnb1;Cd34;Cd36;Cd63;Cdk5;Cdk6;Cdkn2a;Mia;Coro1a;Col13a1;Csf1;Cttn;Dab2;Dag1;Dapk3;Dmd;Dmp1;Dnm2;Eda;Edil…	27	Cdh13;Col3a1;Col8a1;Col1a1;Epha3;Fbln1;Fbln2;Fn1;Gpm6b;Has2;Itga5;Lgals1;Vcam1;Vtn;Axl;Postn;Col5a3;Smoc2;Ccdc80;Antxr1;Tnxb;Col16a1;Itga8;Itga11;Abi3bp;Frem1;Ecm2
GO:0044236	cyan	multicellular organism metabolic process	BP	0.164706	85	11.3467	Bmp4;Serpinh1;Col5a1;Col1a1;Ctsk;Il6;Mmp2;Mrc2;Ccl2;Mmp19;Mfap4;Tnxb;Adamts2;Ltbp1;Adam15;Adora2b;Adrb1;Adrb2;Ager;Arg1;Bmp8a;Bmp8b;Ctsb;Ctss;Eng;F2;F2r;Fap;Fgfr3;Ctgf;Ghr;Hif1a;Id1;Ihh;Il18;Il6ra;Itga2;Itgb1;Mc4r;Mmp10;Mmp11;Mmp13;Mmp14;Mmp16;Mmp3;Mmp7;Mmp9;P2rx7;Pdgfb;Pdgfrb;Pepd;Prkcd;Pla2g1b;Serpinf2;Ppard;Pparg;Scx;Tgfb1;Tgfb3;Tgfbr3;Prss2;Wnt4;Cbx8;Prdx5;P3h1;Trpv4;Rgcc;Oma1;Gpr39;Errfi1;Ti…	14	Bmp4;Serpinh1;Col5a1;Col1a1;Ctsk;Il6;Mmp2;Mrc2;Ccl2;Mmp19;Mfap4;Tnxb;Adamts2;Ltbp1
GO:0005126	cyan	cytokine receptor binding	MF	0.102679	224	10.8283	Bmp4;Csf2;Ecm1;Cxcl1;Il11;Il6;Inhba;Lif;Ngf;Ccl11;Ccl2;Ccl22;Ccl7;Ccl8;Cxcl5;Ccl19;Clcf1;Pf4;Cxcl14;Il34;Spred1;Cxcl3;Gm2564;Adam17;Angpt1;Angpt2;Angpt4;Amh;Bdnf;Ngfrap1;Bmp1;Bmp2;Bmp5;Bmp6;Bmp7;Bmp8a;Bmp8b;Gdf2;Casp3;Casp8;Cd2ap;Cd44;Cflar;Cntf;Creb3;Crlf1;Csf1;Ctf1;Lefty1;Eda;Efna5;Eng;Fadd;Fasl;Fem1b;Figf;Fkbp1a;Gata3;Usp15;Gdf1;Gdf10;Gdf11;Gdf3;Gdf5;Gdf9;Gdnf;Grb2;Grin2b;Hsd17b7;Cxcl10;Ifna2;…	23	Bmp4;Csf2;Ecm1;Cxcl1;Il11;Il6;Inhba;Lif;Ngf;Ccl11;Ccl2;Ccl22;Ccl7;Ccl8;Cxcl5;Ccl19;Clcf1;Pf4;Cxcl14;Il34;Spred1;Cxcl3;Gm2564
GO:0048020	cyan	CCR chemokine receptor binding	MF	0.269231	26	10.6409	Ccl11;Ccl2;Ccl22;Ccl7;Ccl8;Ccl19;Gm2564;Creb3;Jak1;Nes;Ccl12;Ccl17;Ccl20;Ccl25;Ccl3;Ccl4;Ccl5;Ccl6;Ccl9;Cx3cl1;Stat1;Stat3;Ccrl2;Cxcl13;Cnih4;Nup85	7	Ccl11;Ccl2;Ccl22;Ccl7;Ccl8;Ccl19;Gm2564
GO:0043205	cyan	fibril	CC	0.357143	14	10.5055	Fbn1;Fbn2;Mfap5;Mfap4;Ltbp1;Mfap2;Muc5ac;Slc1a3;Snca;Adamtsl5;Mfap1a;Thsd4;Adamts10;Mfap1b	5	Fbn1;Fbn2;Mfap5;Mfap4;Ltbp1
GO:0035987	cyan	endodermal cell differentiation	BP	0.3	20	10.4607	Col5a1;Col5a2;Fn1;Inhba;Itga5;Vtn;Ctnnb1;Gata6;Itgav;Mesp1;Sox17;Hnf1b;Ctr9;Paf1;Dusp6;Hsbp1;Nanog;Rtf1;Cdc73;Leo1	6	Col5a1;Col5a2;Fn1;Inhba;Itga5;Vtn
GO:0006954	cyan	inflammatory response	BP	0.0720165	486	10.4486	Bdkrb1;Cfh;Ccr7;Ackr1;Ecm1;Fn1;Cxcl1;Hgf;Il6;Anxa1;Il1rl1;Ptgs2;Ccl11;Ccl2;Ccl22;Ccl7;Ccl8;Cxcl5;Serpinf1;Sele;Selp;Sdc1;Tgm2;Tnfaip6;Ccl19;Axl;Clcf1;Pf4;Rarres2;Il34;Il33;Il1rl2;Olr1;Cxcl3;Gm2564;Ace;Acp5;Chrna7;Ada;Adam17;Adam8;Adcyap1;Adora1;Adora2a;Adora2b;Adora3;Adra2a;Adrb2;Ager;Agt;Agtr1a;Ahsg;Akt1;Alox5;Alox5ap;Aoc3;Fabp4;Birc2;Apoa1;Apod;Apoe;Slc7a2;Atrn;Bcl6;Bdkrb2;Btk;Serping1;C1qbp;C3…	35	Bdkrb1;Cfh;Ccr7;Ackr1;Ecm1;Fn1;Cxcl1;Hgf;Il6;Anxa1;Il1rl1;Ptgs2;Ccl11;Ccl2;Ccl22;Ccl7;Ccl8;Cxcl5;Serpinf1;Sele;Selp;Sdc1;Tgm2;Tnfaip6;Ccl19;Axl;Clcf1;Pf4;Rarres2;Il34;Il33;Il1rl2;Olr1;Cxcl3;Gm2564
GO:0043394	cyan	proteoglycan binding	MF	0.25	28	10.2076	Cfh;Col5a1;Ctsk;Fst;Gpc3;Gpc6;Col5a3;Agrn;Comp;Ctsb;Ctss;Gpc1;Gpc4;Lipc;Itgam;Nid1;Pla2g2d;Ptn;Ptprc;Ptprf;Sema5a;Slit1;Slit2;Grem1;Psg23;Gpc2;Atp1a3;Lrrtm4	7	Cfh;Col5a1;Ctsk;Fst;Gpc3;Gpc6;Col5a3
GO:0010810	cyan	regulation of cell-substrate adhesion	BP	0.113208	159	10.1998	Cdh13;Col8a1;Col1a1;Epha3;Fbln1;Fbln2;Fn1;Gpm6b;Has2;Itga5;Lgals1;Vtn;Postn;Smoc2;Ccdc80;Col16a1;Abi3bp;Ecm2;Macf1;Acvrl1;Adam15;Angpt2;Apoa1;Apod;Rhod;Arhgap6;Bcl2;Bcl6;C1qbp;Ddr1;Calr;Cask;Cd36;Cdk6;Cdkn2a;Csf1;Dab2;Dapk3;Dmd;Dmp1;Dnm2;Edil3;Efna5;Emp2;Dmtn;Epha1;Ptk2;Fmn1;Fzd4;Fzd7;Gcnt2;Foxf1;Onecut1;Hoxa7;Cyr61;Ilk;Itga3;Itga6;Itgb1;Itgb1bp1;Itgb3;Jak2;Kdr;Smad3;Men1;Mmp14;Myoc;Nf1;Nid1;Ninj…	18	Cdh13;Col8a1;Col1a1;Epha3;Fbln1;Fbln2;Fn1;Gpm6b;Has2;Itga5;Lgals1;Vtn;Postn;Smoc2;Ccdc80;Col16a1;Abi3bp;Ecm2
GO:0061134	cyan	peptidase regulator activity	MF	0.111842	152	9.83193	Serpinh1;Ctsc;Dpep1;Fbln1;Fn1;Gpc3;Itih3;Ngf;Pcolce;Serpinb2;Serpinf1;Serpine2;Tfpi2;Timp1;Pi15;Itih5;Col28a1;Pzp;Agt;Ahsg;Ambp;Prdx3;Apaf1;Birc3;Birc2;Xiap;Birc5;App;Serpinc1;Bad;Bcl10;Bcl2a1d;Bcl2l1;Birc6;Serping1;C3;Cast;Cav1;Cdkn1b;Cflar;Col7a1;Cst3;Cst7;Cstb;Ctla2b;Ctsh;Wfdc18;Gas6;Rack1;Hc;Serpind1;Itih1;Itih2;Itih4;Serpina3c;Lef1;Lxn;Mmp14;Naip1;Furin;Serpine1;Serpinf2;Psme1;Psme2;Psme3;Re…	17	Serpinh1;Ctsc;Dpep1;Fbln1;Fn1;Gpc3;Itih3;Ngf;Pcolce;Serpinb2;Serpinf1;Serpine2;Tfpi2;Timp1;Pi15;Itih5;Col28a1
GO:0072676	cyan	lymphocyte migration	BP	0.169492	59	9.74822	Ccr7;Ecm1;Ccl11;Ccl2;Ccl22;Ccl7;Ccl8;Ccl19;Cxcl14;Gm2564;Adam10;Adam17;Adam8;Aif1;Apod;Artn;Cxcr3;Ccr2;S1pr1;Fadd;Gas6;Gata3;Cxcl10;Itga4;Itgb3;Itgb7;Lgals9;Msn;Padi2;Ptk2b;Ccl12;Ccl17;Ccl20;Ccl25;Ccl27a;Ccl3;Ccl4;Ccl5;Ccl6;Ccl9;Cx3cl1;Cxcl12;Stk10;Tnfsf4;Wnt5a;Pik3cg;Tnfsf14;Cxcl13;Ripk3;Tbx21;Cxcl16;Pycard;Med23;Cklf;Selk;Spns2;Tnfrsf14;Myo1g;Tmem102	10	Ccr7;Ecm1;Ccl11;Ccl2;Ccl22;Ccl7;Ccl8;Ccl19;Cxcl14;Gm2564
GO:0018149	cyan	peptide cross-linking	BP	0.26087	23	9.67805	Bgn;Col3a1;Dcn;Fn1;Anxa1;Tgm2;Epb42;Evpl;Sprr1a;Tgm1;Tgm3;Thbs1;Abca7;Ndnf;Mamdc2;Spock3;F13a1;Crct1;Tgm5;Spock2;Dsp;Egflam;Tgm4	6	Bgn;Col3a1;Dcn;Fn1;Anxa1;Tgm2
GO:0010811	cyan	positive regulation of cell-substrate adhesion	BP	0.134021	97	9.63878	Cdh13;Col8a1;Fbln1;Fbln2;Fn1;Has2;Itga5;Vtn;Smoc2;Ccdc80;Col16a1;Abi3bp;Ecm2;Apoa1;C1qbp;Calr;Cd36;Cdk6;Csf1;Dab2;Dmd;Dmp1;Dnm2;Edil3;Emp2;Dmtn;Epha1;Fmn1;Foxf1;Cyr61;Ilk;Itga3;Itga6;Itgb1;Itgb1bp1;Itgb3;Jak2;Kdr;Smad3;Myoc;Nid1;Ninj1;Enpp2;Prkce;Prkcz;Ptk2b;Ptn;Ptprj;Rac1;Rock1;Rsu1;S100a10;Ccl25;Spp1;Sdc4;Tek;Thbs1;Utrn;Vegfa;Vegfc;Wnt4;Cib1;Hacd1;Myadm;Arhgef7;Egfl6;Dbn1;Hsd17b12;Net1;Gsk3b;Cc…	13	Cdh13;Col8a1;Fbln1;Fbln2;Fn1;Has2;Itga5;Vtn;Smoc2;Ccdc80;Col16a1;Abi3bp;Ecm2
GO:0002548	cyan	monocyte chemotaxis	BP	0.2	40	9.60707	Anxa1;Ccl11;Ccl2;Ccl22;Ccl7;Ccl8;Ccl19;Gm2564;Aif1;Ccr1;Ccr2;Creb3;Flt1;Cxcl10;Lgals3;Lyn;Myo9b;Nbl1;Nov;Pdgfb;Serpine1;Ptpro;Rps19;Ccl12;Ccl17;Ccl20;Ccl25;Ccl3;Ccl4;Ccl5;Ccl6;Ccl9;Cx3cl1;Cxcl12;Slit2;Grem1;Pla2g7;S100a14;Ano6;Tnfsf18	8	Anxa1;Ccl11;Ccl2;Ccl22;Ccl7;Ccl8;Ccl19;Gm2564
GO:0048514	cyan	blood vessel morphogenesis	BP	0.0682303	469	9.57671	Aqp1;Bmp4;Runx1;Cdh13;Col18a1;Col3a1;Col8a1;Cyp1b1;Dcn;Ecm1;Ereg;Foxc2;Fn1;Has2;Hgf;Itga5;Itga7;Lif;Mmp2;Pdgfra;Prrx1;Ptgs2;Ccl11;Ccl2;Serpinf1;Thbs2;Pf4;Mmp19;Rspo3;Adgra2;Mylk;Sulf1;Ace;Chrna7;Acvr1;Acvrl1;Adam15;Adam8;Adamts1;Add1;Adm;Adora2b;Adrb2;Angpt1;Angpt2;Angpt4;Agt;Ahr;Alox12;Ang;Anxa3;Apoe;Apoh;Nr2f2;Rhoa;Rhob;Atp5b;Bak1;Bax;Prdm1;Gdf2;Brca1;Zfp36l1;Klf5;Btg1;C3;C3ar1;C5ar1;C6;Anxa2;C…	32	Aqp1;Bmp4;Runx1;Cdh13;Col18a1;Col3a1;Col8a1;Cyp1b1;Dcn;Ecm1;Ereg;Foxc2;Fn1;Has2;Hgf;Itga5;Itga7;Lif;Mmp2;Pdgfra;Prrx1;Ptgs2;Ccl11;Ccl2;Serpinf1;Thbs2;Pf4;Mmp19;Rspo3;Adgra2;Mylk;Sulf1
GO:0071621	cyan	granulocyte chemotaxis	BP	0.141176	85	9.56235	Ccr7;Cxcl1;Anxa1;Ccl11;Ccl2;Ccl22;Ccl7;Ccl8;Ccl19;Rarres2;Cxcl3;Gm2564;C1qbp;C3ar1;C5ar1;Cxcr2;Ccr3;Csf1;Csf3r;Cxadr;Dapk2;Edn1;Edn2;Edn3;Ednra;Fcer1g;Fcgr3;Slc37a4;Cmklr1;Hrh1;Cd74;Il17ra;Il1b;Il4;Itgam;Itgb2;Lbp;Lgals3;Mpp1;Pde4b;Prkca;Ptprj;Rac1;Rac2;Scg2;Ccl12;Ccl17;Ccl20;Ccl25;Ccl3;Ccl4;Ccl5;Ccl6;Ccl9;Cxcl2;Cx3cl1;Sell;Slit2;Spp1;Syk;Thbs1;Thbs4;Vav1;Vegfa;Pik3cg;Vav3;Trem1;Trpv4;S100a14;Ckl…	12	Ccr7;Cxcl1;Anxa1;Ccl11;Ccl2;Ccl22;Ccl7;Ccl8;Ccl19;Rarres2;Cxcl3;Gm2564
GO:0019221	cyan	cytokine-mediated signaling pathway	BP	0.0851852	270	9.5272	Bgn;Ccr7;Csf2rb2;Dcn;Ackr1;Ecm1;Ereg;Cxcl1;Il6;Osmr;Ccl11;Ccl2;Ccl22;Ccl7;Ccl8;Cxcl5;Ccl19;Axl;Pf4;Podn;Cxcl3;Flrt2;Gm2564;Angpt1;Apoa1;Bad;Cav1;Cd24a;Cdc37;Cebpa;Chad;Cish;Socs3;Socs1;Cxcr2;Cxcr3;Cxcr4;Ccr1;Ccr2;Ccr5;Ackr3;Cntf;Cntfr;Csf1;Csf1r;Csf2rb;Csnk2b;Cx3cr1;Edn2;Egr1;Epor;F2rl1;F3;Acsl1;Fadd;Fas;Fer;Fkbp1a;Flt3;Gab1;Gas6;Gfi1;Ghr;Gp1ba;Ptpn6;Hipk1;Hpx;Prmt2;Cxcl10;Ifna2;Ifnar1;Ifnar2;Ifn…	23	Bgn;Ccr7;Csf2rb2;Dcn;Ackr1;Ecm1;Ereg;Cxcl1;Il6;Osmr;Ccl11;Ccl2;Ccl22;Ccl7;Ccl8;Cxcl5;Ccl19;Axl;Pf4;Podn;Cxcl3;Flrt2;Gm2564
GO:0050900	cyan	leukocyte migration	BP	0.0889831	236	9.3802	Bdkrb1;Ccr7;Ecm1;Cxcl1;Anxa1;Ccl11;Ccl2;Ccl22;Ccl7;Ccl8;Cxcl5;Sele;Selp;Vcam1;Ccl19;Pf4;Cxcl14;Rarres2;Il33;Cxcl3;Gm2564;Ada;Adam10;Adam17;Adam8;Adora1;Adora3;Aif1;Aoc3;Apod;Artn;C1qbp;C3ar1;C5ar1;Calr;Ccr6;Cd24a;Cd34;Cdc42;Chga;Coro1a;Cxcr2;Cxcr3;Ccr1;Ccr3;Ccr2;Creb3;Csf1;Csf3r;Cx3cr1;Cxadr;Dapk2;S1pr1;Edn1;Edn2;Edn3;Ednra;Ednrb;Aimp1;Eps8;Epx;F2rl1;F7;Fadd;Fcer1g;Fcgr3;Fer;Figf;Flt1;Fut7;Slc37a…	21	Bdkrb1;Ccr7;Ecm1;Cxcl1;Anxa1;Ccl11;Ccl2;Ccl22;Ccl7;Ccl8;Cxcl5;Sele;Selp;Vcam1;Ccl19;Pf4;Cxcl14;Rarres2;Il33;Cxcl3;Gm2564
GO:0008083	cyan	growth factor activity	MF	0.119658	117	9.31314	Bmp4;Csf2;Csf3;Ereg;Cxcl1;Hgf;Il11;Il6;Inhba;Lif;Ngf;Ogn;Timp1;Il34;Gfer;Amelx;Areg;Artn;Bdnf;Bmp1;Bmp2;Bmp5;Bmp6;Bmp7;Bmp8a;Bmp8b;Gdf2;Btc;Mia;Cntf;Csf1;Lefty1;Egf;Fbrs;Fgf1;Fgf11;Fgf12;Fgf13;Fgf14;Fgf15;Fgf17;Fgf18;Fgf2;Fgf5;Fgf7;Fgf9;Figf;Ctgf;Gdf10;Gdf11;Gdf3;Gdf5;Gdf9;Gdnf;Gpi1;Hdgf;Hbegf;Igf1;Igf2;Il12a;Il12b;Il2;Il4;Il5;Il7;Inha;Inhbb;Jag2;Mdk;Kitl;Mstn;Klk1b4;Klk1b3;Nov;Nrg3;Nrtn;Ntf3;Osm…	14	Bmp4;Csf2;Csf3;Ereg;Cxcl1;Hgf;Il11;Il6;Inhba;Lif;Ngf;Ogn;Timp1;Il34
GO:1903036	cyan	positive regulation of response to wounding	BP	0.11194	134	9.23588	Ccr7;Foxc2;Pdpn;Il6;Anxa1;Il1rl1;Ptgs2;Ccl11;Ccl2;Ccl7;Ccl8;Selp;Tgm2;Il33;Mylk;Ace;Adam8;Adora2b;Adora3;Adra2a;Ager;Alox5ap;Aoc3;Fabp4;Apoh;C3;Capn3;Cd24a;Cd28;Cd36;Cd6;Clock;Ccr2;Ccr5;Cnr1;Cntf;Ctss;Ednra;Egfr;Dmtn;F2;F2r;F7;Fcer1g;Fcgr1;Fcgr3;Fkbp1b;Hbegf;Hpse;Hras;Hspd1;Hyal2;Ido1;Igf1r;Il17ra;Il1b;Insl3;Itga2;Cd47;Jak2;Lbp;Lta;Mif;Myc;Nfe2l2;Ntrk3;Prkca;Prkce;Pla2g4a;Serpine1;Plg;Serpinf2;Pp…	15	Ccr7;Foxc2;Pdpn;Il6;Anxa1;Il1rl1;Ptgs2;Ccl11;Ccl2;Ccl7;Ccl8;Selp;Tgm2;Il33;Mylk
GO:0002828	cyan	regulation of type 2 immune response	BP	0.24	25	9.23387	Ecm1;Il6;Anxa1;Il27ra;Clcf1;Il33;Bcl6;Ccr2;Gata3;Hlx;Ido1;Ifnb1;Cd74;Il4ra;Irf1;Prkcz;Rara;Stat6;Tnfsf4;Zfp35;Socs5;Rsad2;Ndfip1;Nlrp3;Nod2	6	Ecm1;Il6;Anxa1;Il27ra;Clcf1;Il33
GO:0071347	cyan	cellular response to interleukin-1	BP	0.166667	54	9.15406	Fn1;Il6;Ccl11;Ccl2;Ccl22;Ccl7;Ccl8;Ccl19;Gm2564;Cebpb;Egr1;Hyal1;Hyal2;Ikbkb;Il1r1;Irak1;Il1rn;Irf1;Irg1;Nfkb1;Serpine1;Plcb1;Rbmx;Rela;Upf1;Rora;Saa3;Ccl12;Ccl17;Ccl20;Ccl25;Ccl3;Ccl4;Ccl5;Ccl6;Ccl9;Cx3cl1;Traf6;Yy1;Mapk3;Rps6ka4;Pycard;Dab2ip;Vrk2;Cactin;Rps6ka5;Irak3;Ankrd1;Adamts7;Irak2;Hyal3;Mylk3;Tnip2;Adamts12	9	Fn1;Il6;Ccl11;Ccl2;Ccl22;Ccl7;Ccl8;Ccl19;Gm2564
GO:0097435	cyan	fibril organization	BP	0.277778	18	9.14933	Col3a1;Col5a1;Mfap5;Mfap4;Tnxb;App;Cd36;Cst3;Fkbp1a;Hspa8;Hsp90ab1;Ilk;Ltbp2;Muc5ac;Ripk1;Ripk3;B4galt7;Gsn	5	Col3a1;Col5a1;Mfap5;Mfap4;Tnxb
GO:0085029	cyan	extracellular matrix assembly	BP	0.230769	26	9.03054	Gpm6b;Has1;Has2;Lox;Mfap4;Tnxb;Agt;Atp7a;Dag1;Has3;Ihh;Smad3;Myh11;Notch1;Sox9;Tgfb1;Fbln5;Plod3;Ramp2;Rgcc;Hapln2;Clasp2;Clasp1;Phldb1;Thsd4;Phldb2	6	Gpm6b;Has1;Has2;Lox;Mfap4;Tnxb
GO:0001525	cyan	angiogenesis	BP	0.0701299	385	8.96424	Aqp1;Bmp4;Runx1;Cdh13;Col18a1;Col8a1;Cyp1b1;Dcn;Ecm1;Ereg;Foxc2;Fn1;Hgf;Itga5;Lif;Mmp2;Pdgfra;Ptgs2;Ccl11;Ccl2;Serpinf1;Thbs2;Pf4;Mmp19;Rspo3;Adgra2;Sulf1;Ace;Chrna7;Acvr1;Acvrl1;Adam15;Adam8;Adamts1;Add1;Adm;Adora2b;Adrb2;Angpt1;Angpt2;Angpt4;Agt;Ahr;Alox12;Ang;Anxa3;Apoh;Rhoa;Rhob;Atp5b;Bak1;Bax;Gdf2;Brca1;Klf5;Btg1;C3;C3ar1;C5ar1;C6;Anxa2;Casp8;Ctnnb1;Cav1;Cd34;Cd36;Cd59a;Cdc42;Chil1;Cxcr2;Cxc…	27	Aqp1;Bmp4;Runx1;Cdh13;Col18a1;Col8a1;Cyp1b1;Dcn;Ecm1;Ereg;Foxc2;Fn1;Hgf;Itga5;Lif;Mmp2;Pdgfra;Ptgs2;Ccl11;Ccl2;Serpinf1;Thbs2;Pf4;Mmp19;Rspo3;Adgra2;Sulf1
GO:0070555	cyan	response to interleukin-1	BP	0.147059	68	8.94733	Fn1;Il6;Ccl11;Ccl2;Ccl22;Ccl7;Ccl8;Sele;Ccl19;Gm2564;Cebpb;Cited1;Egr1;Aes;Hyal1;Hyal2;Ikbkb;Il1r1;Irak1;Il1rn;Irf1;Irg1;Myd88;Nfkb1;Igbp1;Prkca;Prkci;Serpine1;Plcb1;Rbmx;Rela;Upf1;Rora;Saa3;Ccl12;Ccl17;Ccl20;Ccl25;Ccl3;Ccl4;Ccl5;Ccl6;Ccl9;Cx3cl1;Snca;Src;Tnfrsf11a;Traf6;Yy1;Mapk3;Rps6ka4;Pycard;Dab2ip;Vrk2;Cactin;Rps6ka5;Irak3;Ankrd1;Taf9;Adamts7;Irak2;Hyal3;Ripk2;Hdac4;Mylk3;Tnip2;Adamts12;Ythd…	10	Fn1;Il6;Ccl11;Ccl2;Ccl22;Ccl7;Ccl8;Sele;Ccl19;Gm2564
GO:0097530	cyan	granulocyte migration	BP	0.126316	95	8.92045	Ccr7;Cxcl1;Anxa1;Ccl11;Ccl2;Ccl22;Ccl7;Ccl8;Ccl19;Rarres2;Cxcl3;Gm2564;Adam8;C1qbp;C3ar1;C5ar1;Cxcr2;Ccr3;Csf1;Csf3r;Cxadr;Dapk2;Edn1;Edn2;Edn3;Ednra;Epx;Fcer1g;Fcgr3;Slc37a4;Cmklr1;Hrh1;Cd74;Il17ra;Il1a;Il1b;Il4;Itgam;Itgb2;Lbp;Lgals3;Mpp1;Myd88;Pde4b;Prkca;Ptger3;Ptger4;Ptprj;Rac1;Rac2;Scg2;Ccl12;Ccl17;Ccl20;Ccl25;Ccl3;Ccl4;Ccl5;Ccl6;Ccl9;Cxcl2;Cx3cl1;Sell;Slit2;Spp1;Syk;Thbs1;Thbs4;Vav1;Vegfa;…	12	Ccr7;Cxcl1;Anxa1;Ccl11;Ccl2;Ccl22;Ccl7;Ccl8;Ccl19;Rarres2;Cxcl3;Gm2564
GO:0034097	cyan	response to cytokine	BP	0.0635246	488	8.90899	Bgn;Ccr7;Col3a1;Csf2rb2;Csf3;Dcn;Ackr1;Ecm1;Ereg;Fn1;Cxcl1;Il6;Mrc1;Osmr;Ptgs2;Ccl11;Ccl2;Ccl22;Ccl7;Ccl8;Cxcl5;Sele;Selp;Timp1;Ccl19;Axl;Pf4;Podn;Cxcl3;Flrt2;Gm2564;Acp5;Adam10;Adam9;Angpt1;Akt1;Apoa1;Aqp4;Rplp0;Avpr2;Bad;Bcl2;Bcl2l1;Brca1;Ciita;Casp6;Casp8;Ctnnb1;Cav1;Cd14;Cd24a;Entpd2;Cdc37;Cebpa;Cebpb;Chad;Chuk;Cish;Socs3;Socs1;Cited1;Coro1a;Cxcr2;Cxcr3;Cxcr4;Ccr1;Ccr2;Ccr5;Ackr3;Cntf;Cntfr;C…	31	Bgn;Ccr7;Col3a1;Csf2rb2;Csf3;Dcn;Ackr1;Ecm1;Ereg;Fn1;Cxcl1;Il6;Mrc1;Osmr;Ptgs2;Ccl11;Ccl2;Ccl22;Ccl7;Ccl8;Cxcl5;Sele;Selp;Timp1;Ccl19;Axl;Pf4;Podn;Cxcl3;Flrt2;Gm2564
GO:0030593	cyan	neutrophil chemotaxis	BP	0.144928	69	8.86759	Ccr7;Cxcl1;Ccl11;Ccl2;Ccl22;Ccl7;Ccl8;Ccl19;Cxcl3;Gm2564;C1qbp;C3ar1;C5ar1;Cxcr2;Csf3r;Cxadr;Dapk2;Edn1;Edn2;Edn3;Ednra;Fcer1g;Fcgr3;Slc37a4;Cd74;Il1b;Itgam;Itgb2;Lbp;Lgals3;Mpp1;Pde4b;Prkca;Rac1;Rac2;Ccl12;Ccl17;Ccl20;Ccl25;Ccl3;Ccl4;Ccl5;Ccl6;Ccl9;Cxcl2;Cx3cl1;Sell;Slit2;Spp1;Syk;Thbs4;Vav1;Pik3cg;Vav3;Trem1;Cklf;Il23a;Jam3;Itga9;Nckap1l;Gbf1;Itga1;Tirap;Camk1d;Pde4d;Nod2;Amica1;Prex1;C5ar2	10	Ccr7;Cxcl1;Ccl11;Ccl2;Ccl22;Ccl7;Ccl8;Ccl19;Cxcl3;Gm2564
GO:0010466	cyan	negative regulation of peptidase activity	BP	0.0993789	161	8.81783	Aqp1;Dpep1;Ecm1;Gpc3;Hgf;Il6;Itih3;Ngf;Serpinb2;Serpine2;Tfpi2;Timp1;Vtn;Pi15;Itih5;Col28a1;Pzp;Adora2a;Akt1;Akt2;Ambp;Prdx3;Birc3;Birc2;Xiap;Birc5;App;Serpinc1;Bcl2a1d;Bcl2l1;Birc6;Serping1;Cast;Cd44;Cdkn2d;Cflar;Col7a1;Cryab;Csnk2a1;Cst3;Cst7;Cstb;Ddx3x;Wfdc18;Gas6;Gpi1;Gpx1;Serpind1;Htt;Nr4a1;Hspa1b;Igf1;Itih1;Itih2;Itih4;Klf4;Serpina3c;Lef1;Lxn;Mdm2;Mmp9;Naip1;Naip2;Igbp1;Furin;Serpine1;Plaur…	16	Aqp1;Dpep1;Ecm1;Gpc3;Hgf;Il6;Itih3;Ngf;Serpinb2;Serpine2;Tfpi2;Timp1;Vtn;Pi15;Itih5;Col28a1
GO:0002685	cyan	regulation of leukocyte migration	BP	0.103448	145	8.76803	Bdkrb1;Ccr7;Ecm1;Cxcl1;Anxa1;Ccl2;Cxcl5;Sele;Selp;Ccl19;Pf4;Cxcl14;Rarres2;Il33;Cxcl3;Ada;Adam10;Adam17;Adam8;Adora1;Adora3;Aif1;Aoc3;Apod;C1qbp;C3ar1;C5ar1;Calr;Ccr6;Cxcr2;Cxcr3;Ccr1;Ccr2;Creb3;Csf1;Dapk2;Edn1;Edn2;Edn3;Ednra;F2rl1;F7;Fadd;Figf;Gas6;Cmklr1;Hc;Mst1;Hoxa7;Icam1;Cxcl10;Cd74;Il12a;Il1a;Il1b;Il4;Itga2;Itga2b;Itga4;Itgb3;Lbp;Lgals3;Lgals9;Lyn;Madcam1;Kitl;Cxcl9;Mmp9;Mpp1;Msn;Myd88;Nbl…	15	Bdkrb1;Ccr7;Ecm1;Cxcl1;Anxa1;Ccl2;Cxcl5;Sele;Selp;Ccl19;Pf4;Cxcl14;Rarres2;Il33;Cxcl3
GO:0071345	cyan	cellular response to cytokine stimulus	BP	0.0680101	397	8.7555	Bgn;Ccr7;Csf2rb2;Csf3;Dcn;Ackr1;Ecm1;Ereg;Fn1;Cxcl1;Il6;Mrc1;Osmr;Ccl11;Ccl2;Ccl22;Ccl7;Ccl8;Cxcl5;Selp;Ccl19;Axl;Pf4;Podn;Cxcl3;Flrt2;Gm2564;Angpt1;Akt1;Apoa1;Aqp4;Rplp0;Bad;Brca1;Cav1;Cd24a;Entpd2;Cdc37;Cebpa;Cebpb;Chad;Chuk;Cish;Socs3;Socs1;Coro1a;Cxcr2;Cxcr3;Cxcr4;Ccr1;Ccr2;Ccr5;Ackr3;Cntf;Cntfr;Crhbp;Csf1;Csf1r;Csf2ra;Csf2rb;Csnk2b;Cx3cr1;Dapk3;Edn2;Egr1;Epor;F2rl1;F3;Acsl1;Fadd;Fas;Fasn;Fer…	27	Bgn;Ccr7;Csf2rb2;Csf3;Dcn;Ackr1;Ecm1;Ereg;Fn1;Cxcl1;Il6;Mrc1;Osmr;Ccl11;Ccl2;Ccl22;Ccl7;Ccl8;Cxcl5;Selp;Ccl19;Axl;Pf4;Podn;Cxcl3;Flrt2;Gm2564
GO:0060326	cyan	cell chemotaxis	BP	0.0895522	201	8.71434	Ccr7;Cxcl1;Hgf;Anxa1;Pdgfra;Ccl11;Ccl2;Ccl22;Ccl7;Ccl8;Cxcl5;Vcam1;Ccl19;Pf4;Cxcl14;Rarres2;Cxcl3;Gm2564;Adam10;Adam17;Adam8;Agtr1a;Aif1;C1qbp;C3ar1;C5ar1;Calr;Ccr6;Chga;Coro1a;Cxcr2;Cxcr3;Ccr1;Ccr3;Ccr2;Creb3;Bcar1;Csf1;Csf3r;Cx3cr1;Cxadr;Dapk2;Edn1;Edn2;Edn3;Ednra;Ednrb;Egr3;Eng;Epha2;F2rl1;F7;Fcer1g;Fcgr3;Fgf1;Fgf18;Fgf2;Fgfr1;Figf;Flt1;Slc37a4;Gas6;Lpar1;Cmklr1;Hc;Hbegf;Mst1;Nr4a1;Hoxb9;Hrh1;…	18	Ccr7;Cxcl1;Hgf;Anxa1;Pdgfra;Ccl11;Ccl2;Ccl22;Ccl7;Ccl8;Cxcl5;Vcam1;Ccl19;Pf4;Cxcl14;Rarres2;Cxcl3;Gm2564
GO:0001968	cyan	fibronectin binding	MF	0.214286	28	8.65575	Ctsk;Fbln1;Igfbp5;Mmp2;Tnc;Ccdc80;Comp;Ctss;Ctgf;Igfbp3;Itga3;Itga4;Itgav;Itgb1;Itgb3;Mfap2;Mmp13;Mmp9;Myoc;Sdc4;Thbs1;Thbs4;Vegfa;Hsd17b12;Lrrc15;Plekha2;Fstl3;Ssc5d	6	Ctsk;Fbln1;Igfbp5;Mmp2;Tnc;Ccdc80
GO:1903034	cyan	regulation of response to wounding	BP	0.0704225	355	8.64588	Cfh;Ccr7;Foxc2;Pdpn;Hgf;Il6;Anxa1;Il1rl1;Pdgfra;Ptgs2;Ccl11;Ccl2;Ccl7;Ccl8;Serpinf1;Selp;Serpine2;Tgm2;Thbd;Tnfaip6;Clcf1;Scara5;Il33;Il1rl2;Mylk;Asic2;Ace;Acp5;Chrna7;Ada;Adam8;Adcyap1;Adora1;Adora2a;Adora2b;Adora3;Adra2a;Adrb2;Ager;Agt;Ahsg;Alox12;Alox5ap;Anxa5;Aoc3;Fabp4;Birc2;Apoa1;Apod;Apoe;Apoh;Serpinc1;Slc7a2;Bcl6;Serping1;C1qbp;C3;C6;Anxa2;Capn3;Cask;Casp1;Casp4;Cav1;Cd24a;Cd28;Cd34;Cd36;…	25	Cfh;Ccr7;Foxc2;Pdpn;Hgf;Il6;Anxa1;Il1rl1;Pdgfra;Ptgs2;Ccl11;Ccl2;Ccl7;Ccl8;Serpinf1;Selp;Serpine2;Tgm2;Thbd;Tnfaip6;Clcf1;Scara5;Il33;Il1rl2;Mylk
GO:0030574	cyan	collagen catabolic process	BP	0.25	20	8.62496	Ctsk;Mmp2;Mrc2;Mmp19;Adamts2;Adam15;Ctsb;Ctss;Fap;Itgb1;Mmp10;Mmp11;Mmp13;Mmp14;Mmp16;Mmp3;Mmp7;Mmp9;Pepd;Prss2	5	Ctsk;Mmp2;Mrc2;Mmp19;Adamts2
GO:0030595	cyan	leukocyte chemotaxis	BP	0.100671	149	8.60983	Ccr7;Cxcl1;Anxa1;Ccl11;Ccl2;Ccl22;Ccl7;Ccl8;Cxcl5;Ccl19;Pf4;Cxcl14;Rarres2;Cxcl3;Gm2564;Adam10;Adam17;Adam8;Aif1;C1qbp;C3ar1;C5ar1;Calr;Ccr6;Chga;Coro1a;Cxcr2;Cxcr3;Ccr1;Ccr3;Ccr2;Creb3;Csf1;Csf3r;Cx3cr1;Cxadr;Dapk2;Edn1;Edn2;Edn3;Ednra;Ednrb;F2rl1;F7;Fcer1g;Fcgr3;Figf;Flt1;Slc37a4;Gas6;Cmklr1;Hc;Mst1;Hrh1;Cxcl10;Cd74;Il12a;Il16;Il17ra;Il1b;Il4;Itgam;Itgb2;Kit;Lbp;Lgals3;Lyn;Lyst;Cxcl9;Mpp1;Myo9b…	15	Ccr7;Cxcl1;Anxa1;Ccl11;Ccl2;Ccl22;Ccl7;Ccl8;Cxcl5;Ccl19;Pf4;Cxcl14;Rarres2;Cxcl3;Gm2564
GO:0050840	cyan	extracellular matrix binding	MF	0.163265	49	8.52305	Bgn;Dcn;Ecm1;Eln;Fbln2;Itga7;Lgals1;Vtn;Ache;Adam9;Ctss;Dmp1;Gpc1;Adgrg1;Cyr61;Itga2;Itga2b;Itga3;Itga6;Itgav;Itgb1;Itgb3;Rpsa;Lgals3;Ncl;Nid1;Shh;Slit2;Sparc;Spp1;Tgfbi;Thbs1;Thbs4;Vegfa;Zan;Adamts5;Bcam;Ntn4;Smoc1;Cd248;Lrrc15;Plekha2;Spock2;Tinagl1;Itga9;Adamts15;Olfml2a;Ssc5d;Olfml2b	8	Bgn;Dcn;Ecm1;Eln;Fbln2;Itga7;Lgals1;Vtn
GO:0006935	cyan	chemotaxis	BP	0.0640732	437	8.51299	Bmp4;Cdh13;Ccr7;Egr2;Fn1;Cxcl1;Hgf;Lama2;Anxa1;Lsp1;Pdgfra;Ccl11;Ccl2;Ccl22;Ccl7;Ccl8;Cxcl5;Sema3b;Sema6a;Vcam1;Ccl19;Pf4;Cxcl14;Rarres2;Adgra2;Cxcl3;Flrt2;Gm2564;Adam10;Adam17;Adam8;Ager;Angpt1;Angpt2;Agrn;Agtr1a;Aif1;Akt2;Alcam;Ank3;Apbb1;Apbb2;Apoa1;App;Rhoa;Artn;Arx;Neurog2;Bdnf;Cxcr5;Bmp7;Bmpr1b;Bmpr2;C1qbp;C3ar1;C5ar1;Calr;Casr;Runx3;Ccr6;Cdh4;Cdk5;Cdk5r1;Chga;Chl1;Coro1a;Cxcr2;Cxcr3;Cxcr4;…	28	Bmp4;Cdh13;Ccr7;Egr2;Fn1;Cxcl1;Hgf;Lama2;Anxa1;Lsp1;Pdgfra;Ccl11;Ccl2;Ccl22;Ccl7;Ccl8;Cxcl5;Sema3b;Sema6a;Vcam1;Ccl19;Pf4;Cxcl14;Rarres2;Adgra2;Cxcl3;Flrt2;Gm2564
GO:0001706	cyan	endoderm formation	BP	0.206897	29	8.48246	Col5a1;Col5a2;Fn1;Inhba;Itga5;Vtn;Ctnnb1;Dusp2;Gata4;Gata6;Itgav;Lhx1;Smad2;Mesp1;Dusp1;Sox17;Sox7;Hnf1b;Ctr9;Paf1;Dusp6;Hsbp1;Nanog;Rtf1;Cdc73;Tnrc6c;Leo1;Dusp5;Dusp4	6	Col5a1;Col5a2;Fn1;Inhba;Itga5;Vtn
GO:0042330	cyan	taxis	BP	0.0637813	439	8.48212	Bmp4;Cdh13;Ccr7;Egr2;Fn1;Cxcl1;Hgf;Lama2;Anxa1;Lsp1;Pdgfra;Ccl11;Ccl2;Ccl22;Ccl7;Ccl8;Cxcl5;Sema3b;Sema6a;Vcam1;Ccl19;Pf4;Cxcl14;Rarres2;Adgra2;Cxcl3;Flrt2;Gm2564;Adam10;Adam17;Adam8;Ager;Angpt1;Angpt2;Agrn;Agtr1a;Aif1;Akt2;Alcam;Ank3;Apbb1;Apbb2;Apoa1;App;Rhoa;Artn;Arx;Neurog2;Bdnf;Cxcr5;Bmp7;Bmpr1b;Bmpr2;C1qbp;C3ar1;C5ar1;Calr;Casr;Runx3;Ccr6;Cdh4;Cdk5;Cdk5r1;Chga;Chl1;Coro1a;Cxcr2;Cxcr3;Cxcr4;…	28	Bmp4;Cdh13;Ccr7;Egr2;Fn1;Cxcl1;Hgf;Lama2;Anxa1;Lsp1;Pdgfra;Ccl11;Ccl2;Ccl22;Ccl7;Ccl8;Cxcl5;Sema3b;Sema6a;Vcam1;Ccl19;Pf4;Cxcl14;Rarres2;Adgra2;Cxcl3;Flrt2;Gm2564
GO:0042060	cyan	wound healing	BP	0.0745763	295	8.4578	Aqp1;Col3a1;Col5a1;Col1a1;Fbln1;Foxc2;Fn1;Pdpn;Lox;Anxa1;Pdgfra;Serpinb2;Procr;Selp;Serpine2;Sdc1;Tfpi2;Thbd;Axl;Pf4;Scara5;Mylk;Asic2;Macf1;Actb;Actg1;Acvrl1;Adra2a;Adrb1;Adrb2;Ager;Alox12;Anxa5;Ap3b1;Apoe;Apoh;Rab27a;Serpinc1;Serping1;C3;Ddr1;Anxa2;Capn3;Cask;Cav1;Cd34;Cd36;Entpd1;Entpd2;Cd44;Celsr1;Cflar;Ccr2;Cnn2;Crp;Csrp1;Cxadr;Egfr;Elk3;Eng;Dmtn;Stx2;Erbb2;Erbb4;Evl;Ezh2;F10;F2;F2r;F2rl1;F2…	22	Aqp1;Col3a1;Col5a1;Col1a1;Fbln1;Foxc2;Fn1;Pdpn;Lox;Anxa1;Pdgfra;Serpinb2;Procr;Selp;Serpine2;Sdc1;Tfpi2;Thbd;Axl;Pf4;Scara5;Mylk
GO:0045785	cyan	positive regulation of cell adhesion	BP	0.0721003	319	8.43515	Cdh13;Ccr7;Col8a1;Fbln1;Fbln2;Foxc2;Fn1;Has2;Il6;Itga5;Lgals1;Anxa1;Ccl2;Selp;Tgm2;Vcam1;Vtn;Smoc2;Ccdc80;Il1rl2;Col16a1;Abi3bp;Ecm2;Ada;Adam8;Adam9;Adk;Ager;Angpt1;Aif1;Alox12;Ank3;Ap3b1;Ap3d1;Apc;Apoa1;Rhoa;Rhod;Bad;Bcl10;Blm;Bmi1;Bmp7;C1qbp;Calca;Calr;Cav1;Cd1d1;Cd1d2;Cd24a;Cd28;Cd36;Cd3e;Cd4;Cd44;Cd5;Cd6;Cd63;Cd80;Cd83;Cd86;Cdk6;Chrd;Coro1a;Ccr2;Ccr5;Csf1;Dab2;Dmd;Dmp1;Dnm2;Dpp4;Edil3;Efnb1;E…	23	Cdh13;Ccr7;Col8a1;Fbln1;Fbln2;Foxc2;Fn1;Has2;Il6;Itga5;Lgals1;Anxa1;Ccl2;Selp;Tgm2;Vcam1;Vtn;Smoc2;Ccdc80;Il1rl2;Col16a1;Abi3bp;Ecm2
GO:0032964	cyan	collagen biosynthetic process	BP	0.179487	39	8.43369	Bmp4;Serpinh1;Col5a1;Col1a1;Il6;Ccl2;Ltbp1;Adora2b;Ager;Arg1;Eng;F2;F2r;Ctgf;Ihh;Il18;Il6ra;Itga2;Pdgfb;Pdgfrb;Serpinf2;Ppard;Pparg;Scx;Tgfb1;Tgfb3;Wnt4;Cbx8;Prdx5;Rgcc;Errfi1;Rap1a;Cygb;Tram2;Mkx;Rapgef3;Suco;Ep300;Adamts3	7	Bmp4;Serpinh1;Col5a1;Col1a1;Il6;Ccl2;Ltbp1
GO:0071230	cyan	cellular response to amino acid stimulus	BP	0.16	50	8.42012	Col3a1;Col5a2;Col6a1;Col1a1;Col1a2;Mmp2;Pdgfra;Col16a1;Bcl2l1;Capn2;Cdh1;Cebpb;Socs1;Col4a1;Cpeb1;Dnmt1;Dnmt3a;Dnmt3b;Egfr;Folr1;Glra1;Grin2a;Hsf1;Mmp3;Neurl1a;Ntrk2;Zeb1;Tnf;Ubr1;Xbp1;Rragd;Rragc;Pdgfc;Lamtor3;Nsmf;Lamtor4;Lamtor1;Cpeb4;Rraga;Lamtor5;Ipo5;Pdgfd;Rptor;Lamtor2;Col4a6;Sh3bp4;Cpeb3;Ubr2;Rragb;Slc38a9	8	Col3a1;Col5a2;Col6a1;Col1a1;Col1a2;Mmp2;Pdgfra;Col16a1
GO:0002825	cyan	regulation of T-helper 1 type immune response	BP	0.238095	21	8.39033	Ccr7;Anxa1;Il1rl1;Il27ra;Il33;Ccr2;H2-Ab1;Hlx;Il12b;Il12rb1;Il4ra;Irf1;Jak3;Slc11a1;Tnfsf4;Socs5;Il23a;Havcr2;Ripk2;Nlrp10;Il27	5	Ccr7;Anxa1;Il1rl1;Il27ra;Il33
GO:0030414	cyan	peptidase inhibitor activity	MF	0.106557	122	8.31993	Serpinh1;Dpep1;Gpc3;Itih3;Ngf;Serpinb2;Serpinf1;Serpine2;Tfpi2;Timp1;Pi15;Itih5;Col28a1;Pzp;Agt;Ahsg;Ambp;Prdx3;Birc3;Birc2;Xiap;Birc5;App;Serpinc1;Bcl2a1d;Bcl2l1;Birc6;Serping1;C3;Cast;Col7a1;Cst3;Cst7;Cstb;Ctla2b;Wfdc18;Gas6;Hc;Serpind1;Itih1;Itih2;Itih4;Serpina3c;Lef1;Lxn;Naip1;Furin;Serpine1;Serpinf2;Renbp;Rps6ka1;Slpi;Snca;Serpina1a;Serpina1b;Serpina1c;Serpina1d;Serpina1e;Serpinb9b;Serpinb6b…	13	Serpinh1;Dpep1;Gpc3;Itih3;Ngf;Serpinb2;Serpinf1;Serpine2;Tfpi2;Timp1;Pi15;Itih5;Col28a1
GO:0042092	cyan	type 2 immune response	BP	0.2	30	8.31752	Ecm1;Il6;Anxa1;Il27ra;Clcf1;Il33;Bcl3;Bcl6;Ccr2;Gata3;Hlx;Ido1;Ifnb1;Cd74;Il4;Il4ra;Irf1;Prkcz;Rara;Stat6;Tnfsf4;Zfp35;Batf;Socs5;Crlf2;Rsad2;Ndfip1;Nlrp3;Nod2;Dennd1b	6	Ecm1;Il6;Anxa1;Il27ra;Clcf1;Il33
GO:0032103	cyan	positive regulation of response to external stimulus	BP	0.077821	257	8.31539	Cdh13;Ccr7;Dcn;Fn1;Cxcl1;Il6;Il1rl1;Ptgs2;Ccl11;Ccl2;Ccl7;Ccl8;Cxcl5;Tgm2;Ccl19;Pf4;Cxcl14;Rarres2;Il33;Cxcl3;Ace;Adam10;Adam17;Adam8;Adora2b;Adora3;Adrb2;Ager;Aif1;Akt2;Alox5ap;Aoc3;Fabp4;Atg5;Apoh;Artn;Bmp6;Bmpr2;Bnip3;Bnip3l;C1qbp;C3;C3ar1;C5ar1;Calr;Casr;Ccr6;Cd24a;Cd28;Cd6;Clock;Cxcr2;Cxcr3;Ccr1;Ccr2;Ccr4;Ccr5;Cnr1;Cntf;Creb3;Csf1;Ctss;Cyba;Cyp27b1;Dapk2;Dscam;S1pr1;Edn1;Edn2;Edn3;Ednra;Egfr…	20	Cdh13;Ccr7;Dcn;Fn1;Cxcl1;Il6;Il1rl1;Ptgs2;Ccl11;Ccl2;Ccl7;Ccl8;Cxcl5;Tgm2;Ccl19;Pf4;Cxcl14;Rarres2;Il33;Cxcl3
GO:1990266	cyan	neutrophil migration	BP	0.12987	77	8.28323	Ccr7;Cxcl1;Ccl11;Ccl2;Ccl22;Ccl7;Ccl8;Ccl19;Cxcl3;Gm2564;Adam8;C1qbp;C3ar1;C5ar1;Cxcr2;Csf3r;Cxadr;Dapk2;Edn1;Edn2;Edn3;Ednra;Fcer1g;Fcgr3;Slc37a4;Cd74;Il1a;Il1b;Itgam;Itgb2;Lbp;Lgals3;Mpp1;Myd88;Pde4b;Prkca;Ptger3;Ptger4;Rac1;Rac2;Ccl12;Ccl17;Ccl20;Ccl25;Ccl3;Ccl4;Ccl5;Ccl6;Ccl9;Cxcl2;Cx3cl1;Sell;Slit2;Spp1;Syk;Thbs4;Vav1;Pik3cg;Vav3;Trem1;Jagn1;Cklf;Il23a;Jam3;Itga9;Nckap1l;Gbf1;Itga1;Pawr;Tira…	10	Ccr7;Cxcl1;Ccl11;Ccl2;Ccl22;Ccl7;Ccl8;Ccl19;Cxcl3;Gm2564
GO:1901342	cyan	regulation of vasculature development	BP	0.0833333	216	8.28297	Aqp1;Bmp4;Runx1;Cyp1b1;Dcn;Ecm1;Foxc2;Hgf;Itga5;Lif;Ptgs2;Ccl11;Ccl2;Serpinf1;Thbs2;Pf4;Adgra2;Sulf1;Chrna7;Acvrl1;Adamts1;Add1;Adm;Adora2b;Adrb2;Angpt2;Angpt4;Agt;Alox12;Anxa3;Apoh;Rhoa;Rhob;Bmp7;Gdf2;Brca1;Btg1;C3;C3ar1;C5ar1;C6;Cd34;Cd36;Cd59a;Chil1;Cxcr2;Cxcr3;Ccr3;Ccr2;Ccr5;Col4a2;Col4a3;Crhr2;Ctsh;Cx3cr1;Dll1;Efna1;Efnb2;Egr1;Emp2;Eng;Epha1;Epha2;Ephb4;F3;Fasl;Fgf1;Fgf2;Flt1;Gata2;Gata4;Gat…	18	Aqp1;Bmp4;Runx1;Cyp1b1;Dcn;Ecm1;Foxc2;Hgf;Itga5;Lif;Ptgs2;Ccl11;Ccl2;Serpinf1;Thbs2;Pf4;Adgra2;Sulf1
GO:0045765	cyan	regulation of angiogenesis	BP	0.0867347	196	8.27847	Aqp1;Runx1;Cyp1b1;Dcn;Ecm1;Foxc2;Hgf;Itga5;Lif;Ptgs2;Ccl11;Ccl2;Serpinf1;Thbs2;Pf4;Adgra2;Sulf1;Chrna7;Acvrl1;Adamts1;Add1;Adm;Adora2b;Adrb2;Angpt2;Angpt4;Agt;Alox12;Anxa3;Apoh;Rhoa;Rhob;Gdf2;Brca1;Btg1;C3;C3ar1;C5ar1;C6;Cd34;Cd36;Cd59a;Chil1;Cxcr2;Cxcr3;Ccr3;Ccr2;Ccr5;Col4a2;Col4a3;Crhr2;Ctsh;Cx3cr1;Dll1;Efna1;Emp2;Eng;Epha1;Epha2;F3;Fasl;Fgf1;Fgf2;Flt1;Gata2;Gata4;Gata6;Gtf2i;Hc;Hdac5;Hhex;Hif1…	17	Aqp1;Runx1;Cyp1b1;Dcn;Ecm1;Foxc2;Hgf;Itga5;Lif;Ptgs2;Ccl11;Ccl2;Serpinf1;Thbs2;Pf4;Adgra2;Sulf1
GO:0044243	cyan	multicellular organism catabolic process	BP	0.227273	22	8.17127	Ctsk;Mmp2;Mrc2;Mmp19;Adamts2;Adam15;Ctsb;Ctss;Fap;Itgb1;Mmp10;Mmp11;Mmp13;Mmp14;Mmp16;Mmp3;Mmp7;Mmp9;P2rx7;Pepd;Pla2g1b;Prss2	5	Ctsk;Mmp2;Mrc2;Mmp19;Adamts2
GO:0002687	cyan	positive regulation of leukocyte migration	BP	0.110092	109	8.16488	Bdkrb1;Ccr7;Cxcl1;Ccl2;Cxcl5;Sele;Selp;Ccl19;Pf4;Cxcl14;Rarres2;Cxcl3;Adam10;Adam17;Adam8;Adora3;Aif1;Aoc3;C1qbp;C3ar1;C5ar1;Calr;Ccr6;Cxcr2;Ccr1;Ccr2;Creb3;Csf1;Dapk2;Edn1;Edn2;Edn3;Ednra;F2rl1;F7;Fadd;Figf;Gas6;Cmklr1;Icam1;Cxcl10;Cd74;Il12a;Il1a;Il1b;Il4;Itga2;Itga2b;Itga4;Itgb3;Lbp;Lgals3;Lgals9;Madcam1;Kitl;Cxcl9;Mmp9;Pecam1;Serpine1;Ptafr;Ptger3;Ptger4;Ptk2b;Ptprj;Rac1;Rac2;Ccl12;Ccl20;Ccl2…	12	Bdkrb1;Ccr7;Cxcl1;Ccl2;Cxcl5;Sele;Selp;Ccl19;Pf4;Cxcl14;Rarres2;Cxcl3
GO:0005178	cyan	integrin binding	MF	0.117021	94	8.1317	Col3a1;Fbln1;Fbn1;Fn1;Itga5;Itga7;Vcam1;Vtn;Wisp1;Gpnmb;Col16a1;Adam15;Adam17;Adam8;Adam9;Anp32a;Anxa7;Calr;Casr;Cd151;Cd9;Cdh17;Col4a3;Cxadr;Dab2;S1pr3;Edil3;Egfr;Emp2;Ptk2;Fap;Ctgf;Gfap;Gfra1;S1pr2;Icam1;Icam2;Icam5;Igf1;Cyr61;Ilk;Itga2;Itga3;Itga6;Itgb1;Itgb1bp1;Itgb3;Itgb5;Itgb6;Kdr;L1cam;Lama5;Lamb1;Lamb2;Lyn;Madcam1;Mfge8;Mmp14;Nf2;Nov;P4hb;Ptpn2;Pxn;Sema7a;Syk;Thbs1;Thbs4;Thy1;Timp2;Tln1;T…	11	Col3a1;Fbln1;Fbn1;Fn1;Itga5;Itga7;Vcam1;Vtn;Wisp1;Gpnmb;Col16a1
GO:0071346	cyan	cellular response to interferon-gamma	BP	0.150943	53	8.12799	Mrc1;Ccl11;Ccl2;Ccl22;Ccl7;Ccl8;Ccl19;Gm2564;Aqp4;Cdc37;Socs1;Dapk3;Gapdh;Gbp2b;Gbp2;H2-Ab1;H2-Q7;Hpx;Il12b;Il12rb1;Irf1;Irg1;Jak2;Gbp4;Nos2;Med1;Pparg;Ptpn2;Ccl12;Ccl17;Ccl20;Ccl25;Ccl3;Ccl4;Ccl5;Ccl6;Ccl9;Cx3cl1;Stat1;Rpl13a;Txk;Gbp3;Syncrip;Dapk1;Gbp8;Dnaja3;Gbp6;Eprs;Slc26a6;Gbp7;Gbp9;Nlrc5;Gbp10	8	Mrc1;Ccl11;Ccl2;Ccl22;Ccl7;Ccl8;Ccl19;Gm2564
GO:0030246	cyan	carbohydrate binding	MF	0.0810811	222	8.12157	C4b;Gfpt2;Hk2;Lgals1;Mrc1;Mrc2;Ptx3;Sele;Selp;Clec3b;Vtn;Cd302;Colec11;Olr1;Galnt16;Egln3;Layn;Frem1;Acr;Acan;Aldoa;Asgr1;Atrn;Bcan;Bsg;Calr;Canx;Cd22;Cd24a;Cd33;Cd34;Cd69;Cd72;Cntn1;Vcan;Ncan;Dgcr2;Dpm1;Eng;Epm2a;Fbp1;Fcer2a;Fcna;Ganab;G6pdx;Gaa;Galnt1;Galnt3;Galnt4;Gfpt1;Galk1;Gpi1;P3h3;Gys1;Hexb;Hk1;Igf2r;Il2;Itln1;Klra2;Krt1;Lgals3;Lgals4;Lgals7;Lgals9;Phyh;Klrb1c;Cd93;Ly75;M6pr;Mag;Man2a1;Ma…	18	C4b;Gfpt2;Hk2;Lgals1;Mrc1;Mrc2;Ptx3;Sele;Selp;Clec3b;Vtn;Cd302;Colec11;Olr1;Galnt16;Egln3;Layn;Frem1
GO:0001948	cyan	glycoprotein binding	MF	0.109091	110	8.11609	Cfh;Col5a1;Ctsk;Fst;Gpc3;Lgals1;Selp;Sdc1;Vim;Gpc6;Col5a3;Lrrk2;Agrn;Apoh;B2m;Bmpr1a;Bmpr1b;Calr;Canx;Cd2;Cd4;Cd5;Cd6;Cdh1;Ccr5;Cntn1;Comp;Dnajc5;Ctsb;Ctss;Dag1;Dmd;Egfr;Erbb2;F7;Fgfr1;Fyn;Gfap;Gpc1;Gpc4;Hspa5;Lipc;Hsp90ab1;Hsp90aa1;Ide;Igf2r;Itga3;Itgam;Itgb1;Itgb2;Lck;Ldlr;Lrp8;Map2;Nid1;Pla2g2d;Ctsa;Ptn;Ptprc;Ptprf;Sema5a;Shh;Slit1;Slit2;Serpina1a;Serpina1b;Serpina1c;Serpina1d;Serpina1e;Stx1a;…	12	Cfh;Col5a1;Ctsk;Fst;Gpc3;Lgals1;Selp;Sdc1;Vim;Gpc6;Col5a3;Lrrk2
GO:0050920	cyan	regulation of chemotaxis	BP	0.0877193	171	7.83294	Cdh13;Ccr7;Fn1;Cxcl1;Pdgfra;Ccl2;Cxcl5;Sema3b;Sema6a;Ccl19;Pf4;Cxcl14;Rarres2;Adgra2;Cxcl3;Adam10;Adam17;Ager;Angpt2;Agrn;Aif1;Akt2;Artn;Bmpr2;C1qbp;C3ar1;C5ar1;Calr;Casr;Ccr6;Cxcr2;Cxcr3;Cxcr4;Ccr1;Ccr2;Ccr4;Creb3;Csf1;Dapk2;Dscam;S1pr1;Edn1;Edn2;Edn3;Ednra;Efnb2;F2rl1;F7;Fgf1;Fgf18;Fgf2;Fgfr1;Figf;Gas6;Lpar1;Cmklr1;Hc;Mst1;Hmgb1;Hspb1;Cxcl10;Cd74;Il12a;Il16;Il1b;Il4;Itga2;Kdr;Lbp;Lyn;Smad3;Met;…	15	Cdh13;Ccr7;Fn1;Cxcl1;Pdgfra;Ccl2;Cxcl5;Sema3b;Sema6a;Ccl19;Pf4;Cxcl14;Rarres2;Adgra2;Cxcl3
GO:0050795	cyan	regulation of behavior	BP	0.0756303	238	7.71833	Cdh13;Ccr7;Csf2;Fn1;Cxcl1;Il6;Pdgfra;Penk;Ccl2;Cxcl5;Sema3b;Sema6a;Ccl19;Pf4;Cxcl14;Rarres2;Adgra2;Cxcl3;Chrnb2;Ada;Adam10;Adam17;Adora1;Adora2a;Ager;Angpt2;Agrn;Agrp;Aif1;Akt2;Alb;Artn;Zfhx3;Bmpr2;C1qbp;C3ar1;C5ar1;Calr;Casp1;Casr;Ccr6;Cxcr2;Cxcr3;Cxcr4;Ccr1;Ccr2;Ccr4;Cnr1;Cort;Creb3;Crhr1;Crhr2;Csf1;Dapk2;Dgat1;Dlg4;Drd1;Drd2;Drd3;Dscam;S1pr1;Edn1;Edn2;Edn3;Ednra;Efnb2;F2rl1;F7;Fgf1;Fgf18;Fgf2;…	18	Cdh13;Ccr7;Csf2;Fn1;Cxcl1;Il6;Pdgfra;Penk;Ccl2;Cxcl5;Sema3b;Sema6a;Ccl19;Pf4;Cxcl14;Rarres2;Adgra2;Cxcl3
GO:0002690	cyan	positive regulation of leukocyte chemotaxis	BP	0.125	72	7.66882	Ccr7;Cxcl1;Ccl2;Cxcl5;Ccl19;Pf4;Cxcl14;Rarres2;Cxcl3;Adam10;Adam17;Aif1;C1qbp;C3ar1;C5ar1;Calr;Ccr6;Cxcr2;Ccr1;Ccr2;Creb3;Csf1;Dapk2;Edn1;Edn2;Edn3;Ednra;F2rl1;F7;Figf;Gas6;Cmklr1;Cxcl10;Cd74;Il12a;Il1b;Il4;Lbp;Cxcl9;Serpine1;Ptk2b;Ptprj;Rac1;Rac2;Ccl27a;Ccl4;Ccl5;Cxcl2;Cx3cl1;Cxcl12;Sell;Swap70;Thbs1;Thbs4;Vegfa;Vegfb;Vegfc;Wnt5a;Pla2g7;Tnfsf14;Cxcl13;Trpv4;S100a14;Zfp580;Il23a;Ano6;Nckap1l;Gpsm…	9	Ccr7;Cxcl1;Ccl2;Cxcl5;Ccl19;Pf4;Cxcl14;Rarres2;Cxcl3
GO:0050729	cyan	positive regulation of inflammatory response	BP	0.114943	87	7.66196	Ccr7;Il6;Il1rl1;Ptgs2;Ccl11;Ccl2;Ccl7;Ccl8;Tgm2;Il33;Ace;Adam8;Adora2b;Adora3;Ager;Alox5ap;Aoc3;Fabp4;C3;Cd24a;Cd28;Cd6;Clock;Ccr2;Ccr5;Cnr1;Ctss;Ednra;Egfr;Fcer1g;Fcgr1;Fcgr3;Hspd1;Hyal2;Ido1;Il17ra;Il1b;Itga2;Cd47;Jak2;Lbp;Lta;Mif;Prkca;Pla2g4a;Serpine1;Ptger3;Ptger4;Rps19;Ccl12;Ccl3;Ccl4;Ccl5;Ccl6;Ccl9;Cx3cl1;Stat5a;Stat5b;Tac1;Tlr4;Tnf;Tnfrsf11a;Tnfrsf1a;Tnfsf4;Vamp8;Wnt5a;Tlr2;Pik3cg;Il17rb;…	10	Ccr7;Il6;Il1rl1;Ptgs2;Ccl11;Ccl2;Ccl7;Ccl8;Tgm2;Il33
GO:0019838	cyan	growth factor binding	MF	0.0991736	121	7.61673	Col3a1;Col5a1;Col6a1;Col1a1;Col1a2;Igfbp5;Osmr;Pdgfra;Wisp1;Htra1;Htra3;Ltbp1;Pzp;Acvr1;Acvr1b;Acvr2a;Acvr2b;Acvrl1;Agrn;Api5;Bmpr2;Cd36;Col2a1;Col4a1;Egfr;Eng;Erbb2;Erbb3;Erbb4;Fgfr1;Fgfr2;Fgfr3;Fgfr4;Ctgf;Flt1;Flt4;Ghr;Gpc1;Hap1;Hspa9;Hyal2;Igf1r;Igf2r;Igfals;Cyr61;Igfbp3;Igfbp4;Il10ra;Il11ra1;Il1rn;Il2ra;Il2rb;Il2rg;Il3ra;Il6ra;Il6st;Il9r;Insr;Itgav;Kdr;Kl;Lifr;Rps2;Ltbp2;Ltbp3;Ngfr;Nov;Nrp1;N…	12	Col3a1;Col5a1;Col6a1;Col1a1;Col1a2;Igfbp5;Osmr;Pdgfra;Wisp1;Htra1;Htra3;Ltbp1
GO:0060740	cyan	prostate gland epithelium morphogenesis	BP	0.2	25	7.59171	Ar;Bmp4;Mmp2;Tnc;Sulf1;Bmp7;Cd44;Cyp7b1;Esr1;Fem1b;Fgfr2;Gli2;Foxa1;Id4;Igf1;Igf1r;Notch1;Rarg;Rxra;Sfrp1;Shh;Sox9;Stat5a;Wnt5a;Frs2	5	Ar;Bmp4;Mmp2;Tnc;Sulf1
GO:0004857	cyan	enzyme inhibitor activity	MF	0.0680272	294	7.51381	Bgn;Serpinh1;Dcn;Dpep1;Gpc3;Itih3;Anxa1;Ngf;Serpinb2;Serpinf1;Serpine2;Tfpi2;Timp1;Lrrk2;Pi15;Spred1;Itih5;Col28a1;Podn;Flrt2;Pzp;Agrn;Agt;Ahsg;Ambp;Anxa3;Prdx3;Birc3;Birc2;Xiap;Birc5;Apoa1;Apoa2;Apoc3;App;Serpinc1;Atpif1;Bcl2a1d;Bcl2l1;Birc6;Serping1;C3;Anxa2;Calu;Casp3;Cast;Cdkn1a;Cdkn1b;Cdkn1c;Cdkn2a;Cdkn2b;Cdkn2c;Cdkn2d;Chad;Cish;Socs3;Socs1;Col7a1;Cst3;Cst7;Cstb;Ctla2b;Cd55;Cd55b;Wfdc18;Gas6…	20	Bgn;Serpinh1;Dcn;Dpep1;Gpc3;Itih3;Anxa1;Ngf;Serpinb2;Serpinf1;Serpine2;Tfpi2;Timp1;Lrrk2;Pi15;Spred1;Itih5;Col28a1;Podn;Flrt2
GO:0051346	cyan	negative regulation of hydrolase activity	BP	0.0680272	294	7.51381	Aqp1;Dpep1;Ecm1;Gpc3;Hgf;Il6;Itih3;Anxa1;Ngf;Serpinb2;Ptx3;Serpine2;Tfpi2;Timp1;Vtn;Lrrk2;Pi15;Spred1;Itih5;Col28a1;Pzp;Abl1;Adcyap1;Adora2a;Agrn;Aip;Akt1;Akt2;Ambp;Prdx3;Birc3;Birc2;Xiap;Birc5;Apoa1;Apoa2;Apoc3;App;Serpinc1;Atpif1;Bcl2a1d;Bcl2l1;Bicd1;Birc6;Serping1;Cast;Cd44;Cdkn2d;Cflar;Col7a1;Cry2;Cryab;Csnk2a1;Cst3;Cst7;Cstb;Ddx3x;Ell;Wfdc18;Fkbp1a;Fkbp1b;Gas6;Gpi1;Gpx1;Serpind1;Htt;Nr4a1;Hp…	20	Aqp1;Dpep1;Ecm1;Gpc3;Hgf;Il6;Itih3;Anxa1;Ngf;Serpinb2;Ptx3;Serpine2;Tfpi2;Timp1;Vtn;Lrrk2;Pi15;Spred1;Itih5;Col28a1
GO:0060512	cyan	prostate gland morphogenesis	BP	0.192308	26	7.42022	Ar;Bmp4;Mmp2;Tnc;Sulf1;Bmp7;Cd44;Cyp7b1;Esr1;Fem1b;Fgfr2;Gli2;Foxa1;Id4;Igf1;Igf1r;Notch1;Rarg;Rxra;Sfrp1;Shh;Sox9;Serpinb5;Stat5a;Wnt5a;Frs2	5	Ar;Bmp4;Mmp2;Tnc;Sulf1
GO:0001503	cyan	ossification	BP	0.0636364	330	7.30825	Bmp4;Runx1;Col6a1;Col1a1;Ecm1;Egr2;Fbn2;Foxc2;Gli1;Gpc3;Gpm6b;Igfbp5;Mmp2;Mrc2;Ddr2;Ptgs2;Clec3b;Tnc;Chrdl1;Itga11;Dnm3os;Actn3;Acvr1;Acvr2a;Acvr2b;Adrb2;Ahsg;Alpl;Akt1;Ank;Apc;Areg;Rhoa;Atp5b;Axin2;Bcap29;Bcl2;Bglap3;Bmp1;Bmp2;Bmp5;Bmp6;Bmp7;Bmp8a;Bmp8b;Gdf2;Bmpr1a;Bmpr1b;Bmpr2;Calca;Cat;Casr;Ctnnb1;Runx2;Runx3;Cbfb;Cbs;Noct;Cdk6;Cebpa;Cebpb;Cebpd;Cer1;Chrd;Cited1;Ccr1;Col11a2;Col13a1;Col2a1;Csf…	21	Bmp4;Runx1;Col6a1;Col1a1;Ecm1;Egr2;Fbn2;Foxc2;Gli1;Gpc3;Gpm6b;Igfbp5;Mmp2;Mrc2;Ddr2;Ptgs2;Clec3b;Tnc;Chrdl1;Itga11;Dnm3os
GO:0007160	cyan	cell-matrix adhesion	BP	0.0828402	169	7.26353	Cdh13;Col3a1;Epha3;Fn1;Gpm6b;Vcam1;Vtn;Postn;Col5a3;Tnxb;Col16a1;Itga8;Itga11;Frem1;Macf1;Actn2;Acvrl1;Adam15;Adam8;Adam9;Agt;Apod;Rhoa;Rhod;Arhgap6;Bcl2;Bcl6;Bcl2l11;Ddr1;Cask;Ctnnb1;Cd34;Cd36;Cd63;Cdk5;Cdk6;Cdkn2a;Mia;Col13a1;Csf1;Cttn;Dag1;Dapk3;Dmd;Eda;Efna5;Emp2;Dmtn;Epha1;Ptk2;Fga;Ctgf;Fmn1;Gp5;Onecut1;Hoxa7;Hoxd3;Hpse;Ilk;Itga2;Itga2b;Itga4;Itga6;Itgal;Itgav;Itgb1;Itgb1bp1;Itgb2;Itgb3;Itgb…	14	Cdh13;Col3a1;Epha3;Fn1;Gpm6b;Vcam1;Vtn;Postn;Col5a3;Tnxb;Col16a1;Itga8;Itga11;Frem1
GO:0052547	cyan	regulation of peptidase activity	BP	0.0671378	283	7.24569	Aqp1;Casp12;Dpep1;Ecm1;Gpc3;Hgf;Il6;Itih3;Ngf;Pcolce;Serpinb2;Rest;Serpine2;Tfpi2;Timp1;Vtn;Pi15;Itih5;Col28a1;Pzp;Adora2a;Akt1;Akt2;Alox12;Ambp;Prdx3;Apaf1;Birc3;Birc2;Xiap;Birc5;App;Rhoa;Serpinc1;Bad;Bak1;Bax;Bcl10;Bcl2a1d;Bcl2l1;Bid;Bcl2l11;Birc6;Serping1;Casp8;Casp9;Cast;Cav1;Cck;Cd44;Cdh1;Cdkn1b;Cdkn2a;Cdkn2d;Cflar;Cideb;Col4a3;Col7a1;Cradd;Cryab;Csnk2a1;Cst3;Cst7;Cstb;Ctsh;Cycs;Cyct;Ddx3x;E…	19	Aqp1;Casp12;Dpep1;Ecm1;Gpc3;Hgf;Il6;Itih3;Ngf;Pcolce;Serpinb2;Rest;Serpine2;Tfpi2;Timp1;Vtn;Pi15;Itih5;Col28a1
GO:0050727	cyan	regulation of inflammatory response	BP	0.07173	237	7.20576	Cfh;Ccr7;Hgf;Il6;Anxa1;Il1rl1;Ptgs2;Ccl11;Ccl2;Ccl7;Ccl8;Serpinf1;Tgm2;Tnfaip6;Clcf1;Il33;Il1rl2;Ace;Acp5;Chrna7;Ada;Adam8;Adcyap1;Adora1;Adora2a;Adora2b;Adora3;Adrb2;Ager;Agt;Ahsg;Alox5ap;Aoc3;Fabp4;Birc2;Apoa1;Apod;Apoe;Slc7a2;Bcl6;Serping1;C1qbp;C3;C6;Casp1;Casp4;Cd24a;Cd28;Cd44;Cd59a;Cd6;Socs3;Clock;Ccr2;Ccr5;Cnr1;Cnr2;Cr1l;Ctla2a;Ctss;Cx3cr1;Cd55;Ednra;Ednrb;Egfr;Esr1;Fanca;Fcer1g;Fcgr1;Fcgr…	17	Cfh;Ccr7;Hgf;Il6;Anxa1;Il1rl1;Ptgs2;Ccl11;Ccl2;Ccl7;Ccl8;Serpinf1;Tgm2;Tnfaip6;Clcf1;Il33;Il1rl2
GO:0050921	cyan	positive regulation of chemotaxis	BP	0.0973451	113	7.19889	Cdh13;Ccr7;Fn1;Cxcl1;Ccl2;Cxcl5;Ccl19;Pf4;Cxcl14;Rarres2;Cxcl3;Adam10;Adam17;Ager;Aif1;Akt2;Artn;Bmpr2;C1qbp;C3ar1;C5ar1;Calr;Casr;Ccr6;Cxcr2;Cxcr3;Ccr1;Ccr2;Ccr4;Creb3;Csf1;Dapk2;Dscam;S1pr1;Edn1;Edn2;Edn3;Ednra;F2rl1;F7;Fgf18;Fgf2;Fgfr1;Figf;Gas6;Lpar1;Cmklr1;Hmgb1;Hspb1;Cxcl10;Cd74;Il12a;Il16;Il1b;Il4;Itga2;Kdr;Lbp;Smad3;Met;Cxcl9;Nrp1;Ntf3;Ntrk3;Pdgfb;Pdgfrb;Prkca;Prkd1;Serpine1;Ptk2b;Ptprj;R…	11	Cdh13;Ccr7;Fn1;Cxcl1;Ccl2;Cxcl5;Ccl19;Pf4;Cxcl14;Rarres2;Cxcl3
GO:0043200	cyan	response to amino acid	BP	0.123077	65	7.15755	Col3a1;Col5a2;Col6a1;Col1a1;Col1a2;Mmp2;Pdgfra;Col16a1;Bche;Bcl2l1;Capn2;Cbs;Cdh1;Cdo1;Cebpb;Cfl1;Socs1;Col4a1;Cpeb1;Dnmt1;Dnmt3a;Dnmt3b;Egfr;Folr1;Glra1;Glra4;Glrb;Grin2a;Hsf1;Igf1r;Lrp6;Mmp3;Neurl1a;Ntrk2;Slc1a2;Slc1a3;Zeb1;Tnf;Ubr1;Xbp1;Rragd;Rragc;Pdgfc;Lamtor3;Mtor;Nsmf;Lamtor4;Lamtor1;Ufl1;Cpeb4;Rraga;Lamtor5;Ipo5;Pdgfd;Rptor;Lamtor2;Col4a6;Sh3bp4;Tmbim6;Cpeb3;Gprc6a;Ubr2;Aars;Rragb;Slc38a9	8	Col3a1;Col5a2;Col6a1;Col1a1;Col1a2;Mmp2;Pdgfra;Col16a1
GO:0048520	cyan	positive regulation of behavior	BP	0.0902256	133	7.13832	Cdh13;Ccr7;Fn1;Cxcl1;Penk;Ccl2;Cxcl5;Ccl19;Pf4;Cxcl14;Rarres2;Cxcl3;Adam10;Adam17;Adora2a;Ager;Agrp;Aif1;Akt2;Alb;Artn;Bmpr2;C1qbp;C3ar1;C5ar1;Calr;Casp1;Casr;Ccr6;Cxcr2;Cxcr3;Ccr1;Ccr2;Ccr4;Creb3;Csf1;Dapk2;Drd1;Dscam;S1pr1;Edn1;Edn2;Edn3;Ednra;F2rl1;F7;Fgf18;Fgf2;Fgfr1;Figf;Gas6;Gja1;Lpar1;Cmklr1;Cfap20;Hmgb1;Hspb1;Cxcl10;Cd74;Il12a;Il16;Il1b;Il4;Itga2;Kdr;Lbp;Smad3;Mc1r;Mef2c;Met;Cxcl9;Nr4a3;N…	12	Cdh13;Ccr7;Fn1;Cxcl1;Penk;Ccl2;Cxcl5;Ccl19;Pf4;Cxcl14;Rarres2;Cxcl3
GO:0010574	cyan	regulation of vascular endothelial growth factor production	BP	0.178571	28	7.10392	Cyp1b1;Il6;Ptgs2;Ccl2;Sulf1;Adora2b;Aqp4;Arnt;Atf4;Brca1;C3;C3ar1;C5ar1;Ccr2;Eif2ak3;Flt4;Gata4;Hc;Hif1a;Hpse;Il1a;Il1b;Isl1;Rora;Ndrg2;Nutf2;Sulf2;Ccbe1	5	Cyp1b1;Il6;Ptgs2;Ccl2;Sulf1
GO:0004866	cyan	endopeptidase inhibitor activity	MF	0.0948276	116	7.07124	Serpinh1;Dpep1;Itih3;Ngf;Serpinb2;Serpinf1;Serpine2;Tfpi2;Timp1;Itih5;Col28a1;Pzp;Agt;Ahsg;Ambp;Prdx3;Birc3;Birc2;Xiap;Birc5;App;Serpinc1;Bcl2a1d;Bcl2l1;Birc6;Serping1;C3;Cast;Col7a1;Cst3;Cst7;Cstb;Ctla2b;Gas6;Hc;Serpind1;Itih1;Itih2;Itih4;Serpina3c;Lef1;Lxn;Naip1;Furin;Serpine1;Serpinf2;Renbp;Rps6ka1;Slpi;Snca;Serpina1a;Serpina1b;Serpina1c;Serpina1d;Serpina1e;Serpinb9b;Serpinb6b;Serpini1;Serpina…	11	Serpinh1;Dpep1;Itih3;Ngf;Serpinb2;Serpinf1;Serpine2;Tfpi2;Timp1;Itih5;Col28a1
GO:0097529	cyan	myeloid leukocyte migration	BP	0.0888889	135	7.06428	Ccr7;Cxcl1;Anxa1;Ccl11;Ccl2;Ccl22;Ccl7;Ccl8;Ccl19;Rarres2;Cxcl3;Gm2564;Adam8;Aif1;C1qbp;C3ar1;C5ar1;Chga;Cxcr2;Ccr1;Ccr3;Ccr2;Creb3;Csf1;Csf3r;Cx3cr1;Cxadr;Dapk2;Edn1;Edn2;Edn3;Ednra;Ednrb;Epx;Fcer1g;Fcgr3;Figf;Flt1;Slc37a4;Cmklr1;Hc;Mst1;Hrh1;Cxcl10;Cd74;Il17ra;Il1a;Il1b;Il4;Itgam;Itgb2;Kit;Lbp;Lgals3;Lyn;Mitf;Mpp1;Myd88;Myo9b;Nbl1;Nov;Pde4b;Pdgfb;Prkca;Serpine1;Plcb1;Ptger3;Ptger4;Ptk2b;Ptprj;P…	12	Ccr7;Cxcl1;Anxa1;Ccl11;Ccl2;Ccl22;Ccl7;Ccl8;Ccl19;Rarres2;Cxcl3;Gm2564
GO:0071622	cyan	regulation of granulocyte chemotaxis	BP	0.15	40	7.00944	Ccr7;Cxcl1;Ccl2;Ccl19;Rarres2;Cxcl3;C1qbp;C3ar1;C5ar1;Cxcr2;Csf1;Dapk2;Edn1;Ednra;Cmklr1;Cd74;Il1b;Il4;Lbp;Mpp1;Ptprj;Rac1;Rac2;Ccl5;Cxcl2;Cx3cl1;Sell;Slit2;Thbs1;Thbs4;Trpv4;S100a14;Il23a;Jam3;Nckap1l;Tirap;Camk1d;Tnfsf18;Nod2;C5ar2	6	Ccr7;Cxcl1;Ccl2;Ccl19;Rarres2;Cxcl3
GO:0004867	cyan	serine-type endopeptidase inhibitor activity	MF	0.117647	68	6.95339	Serpinh1;Itih3;Serpinb2;Serpinf1;Serpine2;Tfpi2;Itih5;Col28a1;Pzp;Agt;Ambp;App;Serpinc1;Serping1;Col7a1;Serpind1;Itih1;Itih2;Itih4;Serpina3c;Furin;Serpine1;Serpinf2;Slpi;Serpina1a;Serpina1b;Serpina1c;Serpina1d;Serpina1e;Serpinb9b;Serpinb6b;Serpini1;Serpina3g;Serpina3n;Serpinb6a;Serpinb9;Serpinb5;Serpinb8;Spink1;Spink4;Spint1;Spint2;Tfpi;Pebp1;Pcsk1n;Crim1;Reck;Serpinb1a;Wfdc2;Wfdc1;Serpini2;Spink…	8	Serpinh1;Itih3;Serpinb2;Serpinf1;Serpine2;Tfpi2;Itih5;Col28a1
GO:0071363	cyan	cellular response to growth factor stimulus	BP	0.0547945	438	6.90882	Bmp4;Runx1;Col3a1;Col1a2;Dcn;Fbn1;Fbn2;Fst;Gpc3;Has1;Has2;Hgf;Il6;Ngf;Pdgfra;Ccl2;Htra1;Htra3;Adgra2;Chrdl1;Sulf1;Itga8;Ltbp1;Flrt2;Abl1;Slc33a1;Acvr1;Acvr2a;Acvr2b;Acvrl1;Adam17;Adam9;Parp1;Angpt1;Agt;Akt1;Apaf1;Axin1;Bmp1;Bmp2;Bmp5;Bmp6;Bmp7;Bmp8a;Bmp8b;Gdf2;Bmpr1a;Bmpr1b;Bmpr2;Calca;Cask;Casp3;Ctnnb1;Cav1;Cav2;Runx2;Cd44;Cd59a;Cd63;Cdh5;Cdkn2b;Cer1;Chrd;Cidea;Cited1;Coro1a;Cldn5;Col2a1;Creb1;C…	24	Bmp4;Runx1;Col3a1;Col1a2;Dcn;Fbn1;Fbn2;Fst;Gpc3;Has1;Has2;Hgf;Il6;Ngf;Pdgfra;Ccl2;Htra1;Htra3;Adgra2;Chrdl1;Sulf1;Itga8;Ltbp1;Flrt2
GO:0030850	cyan	prostate gland development	BP	0.146341	41	6.90429	Ar;Bmp4;Mmp2;Serpinf1;Tnc;Sulf1;Ahr;Apc;Bmp7;Ctnnb1;Cd44;Cdkn1b;Cyp7b1;Esr1;Fem1b;Fgfr2;Fkbp4;Gli2;Foxa1;Id4;Igf1;Igf1r;Notch1;Plaur;Prlr;Psap;Pten;Rarg;Rxra;Sfrp1;Shh;Sox9;Serpinb5;Stat5a;Stk11;Ube3a;Wnt5a;Plag1;Wdr77;Eaf2;Frs2	6	Ar;Bmp4;Mmp2;Serpinf1;Tnc;Sulf1
GO:0030282	cyan	bone mineralization	BP	0.105882	85	6.88586	Bmp4;Ecm1;Fbn2;Gpc3;Gpm6b;Ddr2;Ptgs2;Clec3b;Dnm3os;Actn3;Acvr1;Acvr2a;Acvr2b;Adrb2;Ahsg;Ank;Axin2;Bglap3;Bmp2;Bmp6;Bmp7;Bmpr1a;Bmpr1b;Bmpr2;Cer1;Ccr1;Cyp27b1;S1pr1;Eif2ak3;Ercc2;Fgfr2;Fgfr3;Gata1;Gja1;Hif1a;Igf1;Kl;Ltbp3;Smad3;Mef2c;Mgp;Mmp13;Nbr1;Nfe2;P2rx7;Phex;Srgn;Pth1r;Ptk2b;Ptn;Slc8a1;Sox9;Tcf7l2;Klf10;Twist1;Wnt10b;Wnt11;Wnt4;Grem1;Aspn;Sbds;Fbxl15;Trpm4;Bcor;Fam101a;Ifitm5;Asxl2;Fam101b;F…	9	Bmp4;Ecm1;Fbn2;Gpc3;Gpm6b;Ddr2;Ptgs2;Clec3b;Dnm3os
GO:0051384	cyan	response to glucocorticoid	BP	0.127273	55	6.83777	Aqp1;Bmp4;Il6;Anxa1;Pappa;Rest;Acsbg1;Adam9;Agtr1a;Alpl;Aldh3a1;Areg;Ass1;Bche;Bcl2;Casp9;Cdo1;Fas;Gba;Gdnf;Gpr83;Nr3c1;Hmgb1;Htr7;Ifnb1;Il10;Il1rn;Jak2;Klf9;Lcat;Mstn;ND3;Pik3r1;Rxra;Sgk1;Sstr2;Sstr4;Sstr5;Sult1a1;Tgfb1;Tnf;Ube2l3;Map2k1;Pdcd7;Hnrnpu;Fbxo32;Smyd3;Akap13;Crebrf;Agl;Tfap4;Cpn1;Npas4;Tat;Ep300	7	Aqp1;Bmp4;Il6;Anxa1;Pappa;Rest;Acsbg1
GO:0045861	cyan	negative regulation of proteolysis	BP	0.0669291	254	6.83099	Aqp1;Dpep1;Ecm1;Gpc3;Hgf;Il6;Itih3;Ngf;Serpinb2;Serpine2;Tfpi2;Timp1;Vtn;Lrrk2;Pi15;Itih5;Col28a1;Pzp;Adora2a;Akt1;Akt2;Ambp;Prdx3;Apc;Birc3;Birc2;Xiap;Birc5;App;Serpinc1;Atm;Bcl2a1d;Bcl2l1;Birc6;Bub1;Bub1b;Serping1;Cast;Cd44;Cd59a;Cdh1;Cdk5;Cdkn2a;Cdkn2d;Cflar;Cln3;Col7a1;Cr1l;Cryab;Csnk2a1;Csnk2a2;Cst3;Cst7;Cstb;Ctla2a;Ddx3x;Wfdc18;F2;Fhit;Gas1;Gas6;Gpi1;Gpx1;Serpind1;Hdac6;Htt;Hfe;Nr4a1;Hspa1b…	17	Aqp1;Dpep1;Ecm1;Gpc3;Hgf;Il6;Itih3;Ngf;Serpinb2;Serpine2;Tfpi2;Timp1;Vtn;Lrrk2;Pi15;Itih5;Col28a1
GO:0061135	cyan	endopeptidase regulator activity	MF	0.0901639	122	6.82893	Serpinh1;Dpep1;Itih3;Ngf;Serpinb2;Serpinf1;Serpine2;Tfpi2;Timp1;Itih5;Col28a1;Pzp;Agt;Ahsg;Ambp;Prdx3;Birc3;Birc2;Xiap;Birc5;App;Serpinc1;Bcl2a1d;Bcl2l1;Birc6;Serping1;C3;Cast;Col7a1;Cst3;Cst7;Cstb;Ctla2b;Gas6;Hc;Serpind1;Itih1;Itih2;Itih4;Serpina3c;Lef1;Lxn;Naip1;Furin;Serpine1;Serpinf2;Psme1;Psme2;Psme3;Renbp;Rps6ka1;Sfrp2;Slpi;Snca;Serpina1a;Serpina1b;Serpina1c;Serpina1d;Serpina1e;Serpinb9b;Se…	11	Serpinh1;Dpep1;Itih3;Ngf;Serpinb2;Serpinf1;Serpine2;Tfpi2;Timp1;Itih5;Col28a1
GO:0010573	cyan	vascular endothelial growth factor production	BP	0.166667	30	6.81822	Cyp1b1;Il6;Ptgs2;Ccl2;Sulf1;Adora2b;Aqp4;Arnt;Atf4;Brca1;C3;C3ar1;C5ar1;Ccr2;Eif2ak3;Flt4;Gata4;Adgrg1;Hc;Hif1a;Hpse;Il1a;Il1b;Isl1;Rora;Ndrg2;Nutf2;Sulf2;Ccbe1;Adamts3	5	Cyp1b1;Il6;Ptgs2;Ccl2;Sulf1
GO:0022612	cyan	gland morphogenesis	BP	0.0894309	123	6.79012	Ar;Bmp4;Gli1;Hgf;Igfbp5;Il6;Mmp2;Ccl11;Tgm2;Tnc;Sulf1;Areg;Bax;Phb2;Bcl2;Bmp7;Btrc;Ddr1;Capn1;Ctnnd1;Cav1;Cd44;Cdh1;Cdkn2a;Cebpb;Csf1;Cyp7b1;Dag1;Eda;Edar;Egfr;Elf3;Epha2;Esr1;Fem1b;Fgf7;Fgfr1;Fgfr2;B4galt1;Gli2;Gli3;Nr3c1;Mst1;Foxa1;Hpn;Id4;Igf1;Igf1r;Lama1;Lama5;Lrp5;Lrp6;Met;Mki67;Msn;Ncoa3;Nfib;Nkx2-3;Notch1;Notch2;Nrg3;Nrp1;Ntn1;Pax6;Pdgfa;Pdgfb;Etv4;Pgr;Plau;Plxna1;Pml;Polb;Med1;Prox1;Ptch1…	11	Ar;Bmp4;Gli1;Hgf;Igfbp5;Il6;Mmp2;Ccl11;Tgm2;Tnc;Sulf1
GO:0071229	cyan	cellular response to acid chemical	BP	0.0894309	123	6.79012	Aqp1;Col3a1;Col5a2;Col6a1;Col1a1;Col1a2;Epha3;Mmp2;Ngf;Pdgfra;Col16a1;Abca1;Abl2;Adcy6;Add1;Akt1;Bcl2l1;Bdnf;Anxa2;Capn2;Cdh1;Cebpb;Socs1;Col4a1;Cpeb1;Dnmt1;Dnmt3a;Dnmt3b;Phc1;Egfr;Egr1;Eno1;Folr1;Glra1;Gnas;Grin2a;Hoxa1;Hoxa2;Hsf1;Id3;Kcnk4;Kcnmb1;Ltk;Lyn;Mef2c;Mmp3;Neurl1a;Ntrk2;Pdgfb;Abcb4;Prkce;Pkd2;Ptger2;Ptgfr;Ptk2b;Ranbp1;Rara;Rarg;Ret;Rxrb;Nr1h4;S100a10;Shmt1;Ptk6;Sipa1;Sox9;Zeb1;Tead1;Te…	11	Aqp1;Col3a1;Col5a2;Col6a1;Col1a1;Col1a2;Epha3;Mmp2;Ngf;Pdgfra;Col16a1
GO:0070848	cyan	response to growth factor	BP	0.0535714	448	6.77409	Bmp4;Runx1;Col3a1;Col1a2;Dcn;Fbn1;Fbn2;Fst;Gpc3;Has1;Has2;Hgf;Il6;Ngf;Pdgfra;Ccl2;Htra1;Htra3;Adgra2;Chrdl1;Sulf1;Itga8;Ltbp1;Flrt2;Abl1;Slc33a1;Acvr1;Acvr2a;Acvr2b;Acvrl1;Adam17;Adam9;Parp1;Angpt1;Agt;Akt1;Apaf1;Zfhx3;Axin1;Bmp1;Bmp2;Bmp5;Bmp6;Bmp7;Bmp8a;Bmp8b;Gdf2;Bmpr1a;Bmpr1b;Bmpr2;Calca;Cask;Casp3;Ctnnb1;Cav1;Cav2;Runx2;Runx3;Cd44;Cd59a;Cd63;Cdh5;Cdkn2b;Cer1;Chrd;Cidea;Cited1;Coro1a;Cldn5;Co…	24	Bmp4;Runx1;Col3a1;Col1a2;Dcn;Fbn1;Fbn2;Fst;Gpc3;Has1;Has2;Hgf;Il6;Ngf;Pdgfra;Ccl2;Htra1;Htra3;Adgra2;Chrdl1;Sulf1;Itga8;Ltbp1;Flrt2
GO:0001817	cyan	regulation of cytokine production	BP	0.0523013	478	6.77245	Runx1;Ccr7;Csf2;Cyp1b1;Ackr1;Ereg;Fbln1;Fn1;Hgf;Il6;Anxa1;Lum;Il1rl1;Ptgs2;S100b;Ccl2;Cxcl5;Axl;Postn;Il27ra;Pf4;Il33;Gpnmb;Il1rl2;Sulf1;Abl1;Abl2;Acp5;Chrna7;Adam17;Adam8;Adcyap1;Adora2b;Adra2a;Ager;Angpt1;Agt;Agtr1a;Alox8;Anxa4;Atg5;Apoa1;Apoa2;Apod;Aqp4;Arnt;Atf2;Atf4;B2m;Bcl10;Bcl3;Bcl6;Gdf2;Brca1;Btk;Btn1a1;Tspo;C1qbp;C3;C3ar1;C5ar1;Casp1;Casp4;Cd14;Cd1d1;Cd1d2;Cd2;Cd24a;Cd28;Cd2ap;Cd34;Cd36…	25	Runx1;Ccr7;Csf2;Cyp1b1;Ackr1;Ereg;Fbln1;Fn1;Hgf;Il6;Anxa1;Lum;Il1rl1;Ptgs2;S100b;Ccl2;Cxcl5;Axl;Postn;Il27ra;Pf4;Il33;Gpnmb;Il1rl2;Sulf1
GO:0002688	cyan	regulation of leukocyte chemotaxis	BP	0.102273	88	6.7284	Ccr7;Cxcl1;Ccl2;Cxcl5;Ccl19;Pf4;Cxcl14;Rarres2;Cxcl3;Adam10;Adam17;Aif1;C1qbp;C3ar1;C5ar1;Calr;Ccr6;Cxcr2;Ccr1;Ccr2;Creb3;Csf1;Dapk2;Edn1;Edn2;Edn3;Ednra;F2rl1;F7;Figf;Gas6;Cmklr1;Hc;Mst1;Cxcl10;Cd74;Il12a;Il1b;Il4;Lbp;Lyn;Cxcl9;Mpp1;Nbl1;Nov;Padi2;Serpine1;Ptk2b;Ptprj;Rac1;Rac2;Ccl12;Ccl27a;Ccl4;Ccl5;Cxcl2;Cx3cl1;Cxcl12;Sell;Slit2;Swap70;Thbs1;Thbs4;Vegfa;Vegfb;Vegfc;Wnt5a;Grem1;Pla2g7;Tnfsf14;C…	9	Ccr7;Cxcl1;Ccl2;Cxcl5;Ccl19;Pf4;Cxcl14;Rarres2;Cxcl3
GO:0034341	cyan	response to interferon-gamma	BP	0.111111	72	6.69983	Mrc1;Ccl11;Ccl2;Ccl22;Ccl7;Ccl8;Ccl19;Gm2564;Aqp4;Ciita;Cdc37;Socs1;Cited1;Cyp27b1;Dapk3;Gapdh;Gbp2b;Gbp2;Gch1;H2-Aa;H2-Ab1;H2-Eb1;H2-Q7;Hpx;Il12b;Il12rb1;Irf1;Irg1;Jak2;Gbp4;Nos2;Slc11a1;Med1;Pparg;Ptpn2;Ccl12;Ccl17;Ccl20;Ccl25;Ccl3;Ccl4;Ccl5;Ccl6;Ccl9;Cx3cl1;Snca;Trim21;Stat1;Tgtp1;Rpl13a;Txk;Irgm2;Mefv;Gbp3;Syncrip;Cxcl16;Ifitm3;Bst2;Dapk1;Kynu;Gbp8;Parp9;Ifitm2;Dnaja3;Gbp6;Eprs;Slc26a6;Gbp7;G…	8	Mrc1;Ccl11;Ccl2;Ccl22;Ccl7;Ccl8;Ccl19;Gm2564
GO:0031960	cyan	response to corticosteroid	BP	0.122807	57	6.6843	Aqp1;Bmp4;Il6;Anxa1;Pappa;Rest;Acsbg1;Adam9;Agtr1a;Alpl;Aldh3a1;Areg;Ass1;Bche;Bcl2;Casp9;Cdo1;Fas;Gba;Gdnf;Gpr83;Nr3c1;Hmgb1;Htr7;Ifnb1;Il10;Il1rn;Jak2;Kcnma1;Klf9;Lcat;Mstn;ND3;Pik3r1;Rxra;Sgk1;Sstr2;Sstr4;Sstr5;Sult1a1;Tgfb1;Tnf;Ube2l3;Map2k1;Pdcd7;Hnrnpu;Fbxo32;Smyd3;Akap13;Gper1;Crebrf;Agl;Tfap4;Cpn1;Npas4;Tat;Ep300	7	Aqp1;Bmp4;Il6;Anxa1;Pappa;Rest;Acsbg1
GO:0031214	cyan	biomineral tissue development	BP	0.0934579	107	6.67297	Bmp4;Col1a1;Ecm1;Fbn2;Gpc3;Gpm6b;Ddr2;Ptgs2;Clec3b;Dnm3os;Actn3;Acvr1;Acvr2a;Acvr2b;Adrb2;Ahsg;Amelx;Ank;Atp2b2;Axin2;Bglap3;Bmp2;Bmp6;Bmp7;Bmpr1a;Bmpr1b;Bmpr2;Cer1;Ccr1;Cyp27b1;Dmp1;S1pr1;Eif2ak3;Ercc2;Fgfr2;Fgfr3;Gas6;Gata1;Gja1;Hif1a;Igf1;Itgb1bp1;Kl;Ltbp3;Smad3;Mef2c;Mgp;Mmp13;Nbr1;Nfe2;P2rx7;Enpp1;Phex;Ppara;Srgn;Pth1r;Ptk2b;Ptn;Slc8a1;Sox9;Spp1;Stim1;Tbx1;Tcf7l2;Klf10;Otop1;Tuft1;Twist1;Wnt…	10	Bmp4;Col1a1;Ecm1;Fbn2;Gpc3;Gpm6b;Ddr2;Ptgs2;Clec3b;Dnm3os
GO:0001101	cyan	response to acid chemical	BP	0.0732984	191	6.6388	Aqp1;Runx1;Ccr7;Col3a1;Col5a2;Col6a1;Col1a1;Col1a2;Epha3;Mmp2;Ngf;Pdgfra;Ccl19;Col16a1;Aanat;Abca1;Abl2;Adcy6;Add1;Adh1;Akt1;Akr1b3;Aqp3;Bche;Bcl2;Bcl2l1;Bdnf;Anxa2;Capn2;Cbs;Cd36;Cdh1;Cdkn2d;Cdo1;Cebpb;Cfl1;Socs1;Clk2;Col4a1;Cpeb1;Creb1;Ctsh;Cyp27b1;Dhfr;Dnmt1;Dnmt3a;Dnmt3b;Lefty1;Phc1;Egfr;Egr1;Eno1;Folr1;Gata4;Gdap1;Gdap2;Glra1;Glra4;Glrb;Gnas;Grin2a;Hoxa1;Hoxa2;Hsf1;Id3;Igf1r;Igf2r;Kcnk4;Kcnm…	14	Aqp1;Runx1;Ccr7;Col3a1;Col5a2;Col6a1;Col1a1;Col1a2;Epha3;Mmp2;Ngf;Pdgfra;Ccl19;Col16a1
GO:0033627	cyan	cell adhesion mediated by integrin	BP	0.136364	44	6.60931	Cyp1b1;Foxc2;Itga5;Vtn;Col16a1;Itga11;Ada;Adam17;Adam9;Cd24a;Dpp4;Efna1;Epha2;Epha8;Ptk2;Ptpn6;Icam1;Itga2;Itga6;Itgb1bp1;Itgb3;L1cam;Lyn;Nov;Serpine1;Plau;Ptpn11;Ret;Ccl5;Swap70;Syk;Tgfb2;Zap70;Cib1;Cxcl13;Tesc;Ift74;Nckap1l;Lpxn;Fermt3;Npnt;Rac3;Acer2;Piezo1	6	Cyp1b1;Foxc2;Itga5;Vtn;Col16a1;Itga11
GO:0007178	cyan	transmembrane receptor protein serine/threonine kinase signaling pathway	BP	0.0641509	265	6.60564	Bmp4;Col3a1;Col1a2;Fbn1;Fbn2;Fst;Gpc3;Inhba;Ccl2;Trf;Vim;Htra1;Htra3;Chrdl1;Sulf1;Itga8;Ltbp1;Abl1;Slc33a1;Acvr1;Acvr1b;Acvr2a;Acvr2b;Acvrl1;Adam17;Adam9;Parp1;Akap2;Akap3;Axin1;Bmp1;Bmp2;Bmp5;Bmp6;Bmp7;Bmp8a;Bmp8b;Gdf2;Bmpr1a;Bmpr1b;Bmpr2;Cav1;Cav2;Runx2;Cdh5;Cdkn2b;Cer1;Chrd;Cidea;Cited1;Cldn5;Creb1;Csnk2b;Dab2;Dnm2;Lefty1;Egr1;Eng;Ptk2;Foxh1;Fgf9;Fkbp1a;Fkbp8;Folr1;Fos;Fzd1;Gata4;Gata6;Usp15;G…	17	Bmp4;Col3a1;Col1a2;Fbn1;Fbn2;Fst;Gpc3;Inhba;Ccl2;Trf;Vim;Htra1;Htra3;Chrdl1;Sulf1;Itga8;Ltbp1
GO:0050839	cyan	cell adhesion molecule binding	MF	0.0755814	172	6.54331	Cdh13;Col3a1;Fbln1;Fbn1;Fn1;Itga5;Itga7;Vcam1;Vtn;Wisp1;Postn;Gpnmb;Col16a1;Adam15;Adam17;Adam8;Adam9;Ank3;Anp32a;Anxa7;Calr;Caml;Casr;Ctnna1;Ctnna2;Ctnnb1;Ctnnd1;Cd151;Cd1d1;Cd2ap;Cd9;Cdh1;Cdh17;Cdk5r1;Col4a3;Cpe;Cxadr;Dab2;Dsg2;S1pr3;Edil3;Egfr;Emp2;Ptk2;Fap;Fer;Fga;Fgfr1;Ctgf;Gfap;Gfra1;S1pr2;Grin2a;Grin2b;Icam1;Icam2;Icam5;Igf1;Cyr61;Ilk;Itga2;Itga3;Itga4;Itga6;Itgal;Itgb1;Itgb1bp1;Itgb2;Itgb…	13	Cdh13;Col3a1;Fbln1;Fbn1;Fn1;Itga5;Itga7;Vcam1;Vtn;Wisp1;Postn;Gpnmb;Col16a1
GO:0001656	cyan	metanephros development	BP	0.118644	59	6.53814	Bmp4;Fbn1;Foxc2;Gpc3;Lif;Pdgfra;Itga8;Bcl2;Bmp7;Ctnnb1;Cited1;Cxcr2;Egr1;Eya1;Fmn1;Gata3;Gdf11;Gdnf;Gli3;Id2;Lamb2;Smad4;Myc;Nf1;Pax8;Pdgfa;Pdgfb;Pdgfrb;Pou3f3;Ptch1;Ret;Shh;Six2;Six4;Slc5a1;Slit2;Sox8;Sox9;Hnf1b;Tcf21;Wnt9b;Wnt4;Wnt7b;Wt1;Yap1;Grem1;Spry1;Sall1;Aph1c;Dlg5;Wwtr1;Rdh10;Lgr4;Aph1a;Fras1;Robo2;Kif26b;Smo;Fat4	7	Bmp4;Fbn1;Foxc2;Gpc3;Lif;Pdgfra;Itga8
GO:0070206	cyan	protein trimerization	BP	0.133333	45	6.51719	Col6a1;Col6a2;Col1a1;Col1a2;Scara5;Col23a1;Alox5ap;Arg1;Gna11;Gnaq;Gnb1;Lcn2;Mbl1;Mif;Nup62;Ppp2ca;Trim27;Ski;Skil;Trim21;Tnfrsf9;Traf2;Wiz;Hsf4;Nell2;Atxn10;Mgst1;C1qtnf1;Cubn;Col6a4;C1qtnf2;Pnpt1;Nupl1;Uaca;C1qtnf6;Mlkl;C1qtnf3;Trim6;Brk1;Ogt;Dut;Trpm8;C1qtnf5;Nup54;Nell1	6	Col6a1;Col6a2;Col1a1;Col1a2;Scara5;Col23a1
GO:0031099	cyan	regeneration	BP	0.0957447	94	6.43449	Gli1;Hgf;Lif;Anxa1;Mmp2;Prrx1;Cxcl5;Tnc;Vtn;Ace;Adm;Gfer;Apoa1;Apoa2;Apoh;Bcl2;Bdnf;Capn3;Ccnd1;Cdk1;Cebpb;Cflar;Cntf;Dhfr;Epha4;Erbb4;Ezh1;Ezh2;Fas;Fkbp1b;Folr1;Fzd7;Gfap;Gja1;Gpx1;Hmox1;Ifrd1;Igf1;Igf1r;Jak2;Jun;Klf4;Lamb2;Large;Lifr;Matn2;Mif;Naca;Nefl;Ninj1;Nov;Ntrk3;Omg;Pkm;Plau;Plg;Med1;Ppard;Pten;Ptprf;Cxcl12;Sox15;Tec;Tgfb1;Tnr;Txk;Ulk1;Wnt10b;Map2k1;Map2k2;Mapk14;Map4k4;Bin3;Mustn1;Rtn4;…	9	Gli1;Hgf;Lif;Anxa1;Mmp2;Prrx1;Cxcl5;Tnc;Vtn
GO:0048660	cyan	regulation of smooth muscle cell proliferation	BP	0.0869565	115	6.34559	Bmp4;Cdh13;Ereg;Igfbp5;Il6;Pde1a;Ptgir;Ptgs2;Tgm2;Wisp1;Ager;Aif1;Akr1b3;Alox12;Ang;Apod;C3ar1;Ctnnb1;Cav1;Comt;Cyba;S1pr1;Edn1;Egfr;Egr1;Esr1;Ptk2;Fgf2;Fgfr2;Xrcc6;Gnaq;Hbegf;Hif1a;Hmgcr;Hmox1;Id2;Igf1;Igf1r;Igfbp3;Il12a;Il12b;Il15;Il18;Irak1;Il6ra;Ilk;Itga2;Itgb3;Jak2;Jun;Klf4;Mdm2;Mnat1;Myc;Myd88;Nr4a3;Nos3;Notch3;Nppb;Npr1;Npr3;Orc1;Pdgfb;Pdgfrb;Pik3r1;Prkca;Serpinf2;Ppard;Pparg;Ppargc1a;Prkd…	10	Bmp4;Cdh13;Ereg;Igfbp5;Il6;Pde1a;Ptgir;Ptgs2;Tgm2;Wisp1
GO:0070371	cyan	ERK1 and ERK2 cascade	BP	0.0655022	229	6.30292	Bmp4;Fbln1;Fn1;Il6;Lif;Pdgfra;Ccl11;Ccl2;Ccl22;Ccl7;Ccl8;Trf;Ccl19;Clcf1;Gm2564;Abl1;Abl2;Adcyap1;Adra1a;Angpt1;Agt;Atf3;Phb2;Bmp2;C3;C5ar1;Cav1;Cckbr;Cd36;Cd44;Chil1;Ccr1;Ccr3;Ackr3;Crhr2;Csf1r;Csk;Ctsh;Dab2;Dcc;Dlg1;Dmd;Drd2;Ednra;Egf;Egfr;Eif3a;Epha2;Epha7;Epor;Erbb2;Erbb4;Esr1;F2r;F2rl1;Fga;Fgf15;Fgf18;Fgf2;Fgfr2;Fgfr3;Fgfr4;Ctgf;Flt4;Gas6;Gcg;Gcnt2;Gstp1;Ptpn6;Hmgcr;Hras;Htr2a;Htr2b;Icam1;Ig…	15	Bmp4;Fbln1;Fn1;Il6;Lif;Pdgfra;Ccl11;Ccl2;Ccl22;Ccl7;Ccl8;Trf;Ccl19;Clcf1;Gm2564
GO:19013431	cyan	negative regulation of vasculature development	BP	0.101266	79	6.29976	Bmp4;Dcn;Lif;Ccl2;Serpinf1;Thbs2;Pf4;Sulf1;Adamts1;Adrb2;Angpt2;Angpt4;Agt;Apoh;Rhoa;Bmp7;Cd36;Cd59a;Cxcr3;Ccr2;Col4a2;Col4a3;Crhr2;Cx3cr1;Epha2;Fasl;Gtf2i;Hdac5;Hhex;Hoxa5;Cxcl10;Itgb1bp1;Klf4;Foxc1;Nf1;Ngfr;Notch1;Pde3b;Serpine1;Plg;Pml;Ptger4;Ptn;Ptprm;Rock1;Rock2;Sema3e;Sema4a;Sparc;Stat1;Tcf4;Tek;Thbs1;Tie1;Wnt4;Wt1;Xdh;Map2k5;Synj2bp;Amot;Dll4;Foxo4;Pdcd10;Rgcc;Ecscr;Dab2ip;Krit1;Mmrn2;Adgr…	8	Bmp4;Dcn;Lif;Ccl2;Serpinf1;Thbs2;Pf4;Sulf1
[truncated: 8,103 more rows]

## Sheet: KEGG enrichment
	module	path_name	Ontology	set.mean	set.size	z.score	genes	in.set	in.genes
[truncated: 226 more rows]
